# Supplementary material
Source: PubMed Central journal article supplement (PMC7958259)
Supplement: pnas.2000663118.sapp.pdf [file pnas.2000663118.sapp.pdf]

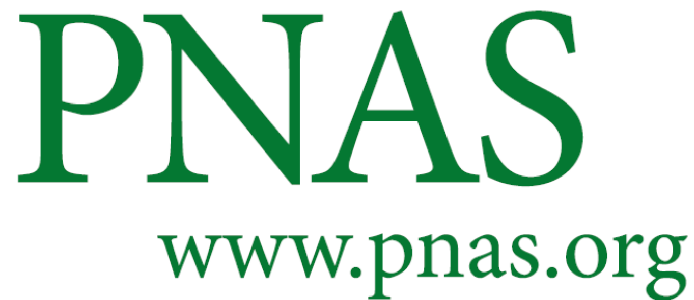

## **Supplementary Information**

### **Human DNA Methylation Signatures Differentiate Persistent from Resolving MRSA Bacteremia**

Yu-Ling Chang, Maura Rossetti, David W. Gjertson, Liudmilla Rubbi, Michael Thompson, Dennis J. Montoya, Marco Morselli, Felicia Ruffin, Alexander Hoffmann, Matteo Pellegrini, Vance G. Fowler, Jr., Michael R. Yeaman, and Elaine F. Reed with the MRSA Systems Immunology Group

Correspondence: Elaine F. Reed, Ph.D.  
[EReed@mednet.ucla.edu](mailto:EReed@mednet.ucla.edu)

#### **This PDF file includes:**

Materials and Methods  
Figures S1 to S6  
Tables S1 to S7  
Preference  
MRSA Systems Immunobiology Group Author List

## **Materials and Methods**

### **Reduced representation bisulfite sequencing (RRBS)**

#### *Library preparation*

Genomic DNA was extracted from whole blood samples using QIAGEN's QIAamp DNA Blood Midi/Maxi Kit, performed at Duke. The purified genomic DNA was shipped on ice to University of California, Los Angeles (UCLA) for RRBS library preparation. Genomic DNA was first quantified by Qubit dsDNA BR Assay Kit (ThermoFisher cat. Q32850). The RRBS libraries were prepared as described(1) with the following conditions. For each sample, 100 ng of purified genomic DNA was digested with 20 U of MspI (NEB, cat # R0106L) at 37°C o/n in the presence of RNase Cocktail Mix (Ambion, cat # AM2286). End-repair and adenylation tailing were performed by the addition of Klenow Fragment 3'→5' exo- (NEB, cat # M0212L) in the presence of dATP, dGTP, and d<sup>5</sup>meCTP (Fermentas). Adapter Ligation was performed by the addition of 0.3 µl of Illumina TruSeq methylated Adapters (Illumina, TruSeq Nano cat# FC-121-4001) and 1 µl of Quick T4 DNA Ligase (NEB cat# M2200L). Samples were pooled and purified using an equal volume of SPRI beads (Beckman Coulter, cat # B23318). Size-selection was performed using SPRI beads to enrich for fragments from 200 to 400 bp. Bisulfite treatment was performed using EpiTect Bisulfite kit (QIAGEN, cat # 59104) according to manufacturer's protocol, except that two consecutive rounds of conversion were performed, for a total of 10 hr of incubation. Purified converted DNA was PCR amplified using MyTaq HS Mix (Bioline, cat# BIO-25045) and TruSeq PCR Primer Cocktail (Illumina, TruSeq Nano cat# FC-121-4001) according to the following protocol: initial denaturation at 98°C for 30 s; 12 cycles of 98°C for 15 s, 60°C for 30 s,

72°C for 30 s; final extension at 72°C for 5 min. Amplified libraries were purified twice with an equal amount of SPRI beads to remove primer and adapter dimers.

### ***Sequence data generation***

Libraries were sequenced in 100 bp single-end (SE) mode (Illumina; HiSeq 3000) at the UCLA BSCRC sequencing core following manufacturer's instructions. Each pool of eight indexed libraries was sequenced in one lane.

### ***Sequence data processing***

The sequencing data were pre-processed with the following steps. The sequencing data were first demultiplexed based on the barcodes of each sample pooled in the lanes. The data were subjected to a quality control step using FastQC (version 0.11.7), where the low quality reads were discarded from further analysis based on the per base sequence quality and per sequence quality score using the default criteria setting in FastQC(2). Sequencing data were trimmed to remove the adaptors and the terminal CG using the trimmomatic software (v0.38) (3). The reads were aligned to the human genome GRCh38/hg38 (release 93, downloaded from Ensembl) and DNA methylation levels were determined using the BS-Seeker2 pipeline(4) with the aligner bowtie (v1.2.2) and the default settings for the fragment length (20 for lower bound, 500 for upper bound). Samples with less than 5 M total raw reads (3 samples) were excluded from further analyses. On average each sample generated about 36 M total raw reads with 73.7% mappability. Within the study, sequencing data were generated from two sequencing runs, termed batch.

## **Targeted Bisulfite Sequencing (TBS-seq)**

### ***Probe design***

The probes were designed by Integrated DNA Technologies based on the coordinates of the DMS we discovered using RRBS data. A total 871 sites, which included 72 regions, (the cut-off of q-value  $< 0.01$  and methylation difference larger than 8% in methylkit analysis) were initially included for the probe design to capture both strands of the CpG. To improve specificity, probes categorized as high off-target risk were removed from the panel before the synthesis of the Discovery Pool probes. The final probe design file is included as **SI Appendix, Table S6**. A total of 1117 probes were designed, including the 160 DMS and 5 DMR reported from the RRBS analysis.

### ***Library Preparation and Data Generation***

500 ng of purified DNA was fragmented to an average of 250 bp using a Bioruptor Pico sonicator (Diagenode) for 15 cycles (30s ON; 90s OFF). End-repair and dA-tailing were performed using the NEBNext Ultra II DNA kit (New England Biolabs) according to manufacturer's instructions. Ligation was performed according the protocol with the addition of 2.5  $\mu$ l of custom pre-methylated unique-dual indexed adapters (15  $\mu$ M, IDT). After purification with 0.8 volumes of Purification Beads (New England Biolabs), samples were pooled in groups of 16. After the addition of human Cot DNA and Universal Blockers TS mix (IDT), the pools were dried in a Vacufuge (Eppendorf). Dried pellets were resuspended with a mixture of Hybridization Buffer, Hybridization Enhancer and custom Discovery Pool probes according to manufacturer's recommendations (IDT – xGen Hybridization Capture of DNA libraries). The hybridization was performed for 24 hrs at 65°C, followed by washes and elution of the captured DNA for 5 minutes at 95°C with TBS elution buffer (10 mM Tris-HCl pH = 8, 0.05% Tween-20). Library pools were then subject to bisulfite treatment (EZ DNA Methylation-Lightning, Zymo Research) and then amplified as follows: 2 min at 98°C; 16 cycles of (98°C for 20 sec;

60°C for 30 sec; 72°C for 30 sec); 72°C for 5 minutes; hold at 4°C. Library QC was performed using the High-Sensitivity D1000 Assay on a 2200 Agilent TapeStation. Libraries were sequenced on a NovaSeq6000 as paired-end 150 bases.

## ***Data processing***

### ***1. DNA methylation data***

The demultiplexed data were subject to FastQC (v0.11.8) before and after adapter sequences were removed with cutadapt (v2.10). Trimmed reads were aligned against the GRCh38 genome using BSBolt (5) according to the pipeline described in (6).

Methylation was called on aligned reads after PCR duplicates removal and the DNA methylation matrix was assembled using the common CpG sites covered by at least 20 reads across all samples.

A total of 3614 intersecting CpG detected from both RRBS and TBS-seq were collected, which included the 121 DMS and 5 DMR reported from RRBS. The correlation between data generated from the two methods was computed and the two-factor ANOVA was used to determine the statistical difference among factors including the disease outcomes and techniques.

### ***2. Genotype data***

As bisulfite conversion leads to the deamination of unmethylated cytosines, it is not possible to distinguish C to T SNPs from conversion events. Therefore, we were only able to detect AA, AG and GG alleles based on reads mapping to the forward strand, and CC, CT and TT alleles based on reads mapping to the reverse strand. As we designed probes to capture both forward and reverse strands at most target regions, we were able to

genotype the majority of alleles in our target regions, and we assign NN genotypes to loci that we could not genotype. To determine which of the possible genotypes was the most probable, we first converted bam files to pileup files using samtools, and then further converted these to ATCGmap files using a custom script. The ATCGmap files contain the counts of ATCG on the forward and atcg on the reverse strands at each position. From these counts vectors we were able to determine the genotypes by correlating the observed counts with the expected counts for each allele combination. We called only alleles for which the correlation was 0.98.

Fisher's exact test was used to determine the association between SNP genotypes and APMB/ARMB outcomes, and the association between genotypes and race group was also tested as a positive control. The adjusted p-values were calculated based on the FDR method.

## **Data Analysis**

### ***Classification of patients***

The classification algorithm, logistic regression, was used to build a classifier using the Python package, scikit-learn version 0.21.2. To build a generalizable classifier and reduce model overfitting, we incorporated a regularization method, elastic net (7), in our classification model. We first optimized the parameter sets for logistic regression including, solvers, modes of penalty, and related C or  $\lambda_1$ \_ratio with corresponding solvers by cross-validated grid-search over a parameter grid. We included all 749,212 CpG in the optimization phase and used both precision and recall score for the model evaluation. We found that the optimal parameter set for our data was a logistic regression model using saga solver with elastic net penalty, setting the C equal to 1,  $\lambda_1$ \_ratio equal to 0.5, and max\_iter equal 1000. Then, the classifiers were trained and tested using

a ten-fold cross-validation strategy. Receiver operating curves (ROC) were used to estimate the sensitivity and specificity of the APMB classification method. The AUC was calculated for each ROC to evaluate the accuracy of APMB classification. The average AUC for the true class label was shown (blue bold line in **Fig. 1A** and **Fig. 2B**; red boxplot in **Fig. 2A**). Within each cross-validation run, the class labels (APMB and ARMB) of samples were randomly shuffled and generated the AUC for random background distribution (black bold line in **Fig. 1A** and **Fig. 2B**; blue boxplot in **Fig. 2A**).

To rank the feature importance of DMS, the logistic regression classification models were developed and evaluated using a 10-fold leave-one-class-out cross-validation strategy. A recursive feature elimination algorithm(8) was used to prune the less important features. Using only the samples in the developing set, we first built the classifiers using all DMS to train the logistic regression model. Next, we selected the top 80% of the DMS with the largest feature importance scores and retrained the logistic regression model using only the selected DMS. This process was iterated until the number of selected DMS reach zero, resulting in the last iteration in a logistic regression classifier trained on only one DMS. Each of the classifiers was evaluated using the samples in the evaluating set; while the permuted class labels (APMB and ARMB) for the evaluating samples were used to calculate the performance for chance outcomes. This iterative backward elimination procedure was repeated using each of the 10 folds as the evaluating set. Note that the evaluating samples were never used for developing the classifiers. The feature importance was measured by regression coefficients generated during developing the classifiers. A 10-fold cross-validation was used among the only developing samples to estimate the feature importance for each DMS, calculating the absolute sum of 10 coefficients for a given DMS, generated during developing of the logistic regression. The absolute sum of coefficient for each DMS (from highest

to lowest) were used to rank the importance of DMS. The following iteration was then used the top 80% ranked DMS to build the new classifiers.

Based on the **Fig. 2A**, a minimum of 16 top ranked DMS was used to generate an optimal classification model using all 142 samples (**Fig. 2B** and **Fig. 2C**). The coefficients were used to calculate the odds ratio by taking an exponent of coefficient. The 95% confidence interval were generated based on the 10-fold cross validation. The mean and 95% confidence interval of odds ratio were plotted using Prism GraphPad.

### ***GREAT Analysis***

To map to the human genome assembly provided in Genomic regions enrichment of annotations tool (GREAT) analysis, we used the command line version of batch coordinate conversion (liftOver) created by the UCSC Genome Browser Group. The program converts genome coordinate and genome annotation files between GRCh37/hg19 and GRCh38/hg38 assemblies.

Functional annotation of the differentially methylated sites was determined using the GREAT tool (<http://great.stanford.edu/public/html/>). This website accepts genomic positions as input. For each run, we provided the list of genomic coordinates of differentially methylated sites (DMS) in the human genome assembly GRCh37/hg19 using the bed file format and used the RRBS-detected CpG sites (after filtering for a minimum of 15x coverage) as background. The analysis was carried out based on the basal plus extension association rules by applying the parameters, proximal 5.0 kb upstream and 1.0 kb downstream, plus distal up to 1Mb. The output is a list of GO classes that are deemed significant by the hypergeometric test. As threshold for significance we set as a False Discovery Rate (FDR) < 0.05 for the region-based hypergeometric test.

### ***Region Set Enrichment Analysis***



We used LOLA(9) to identify significant overlaps of DMS regions with transcription factor binding sites based on ChIP-seq datasets obtained from ENCODE(10) and CODEX(11) database. The Fisher's exact test was used with a significance threshold of 0.05 on FDR adjusted p-values. To facilitate the data interpretation, we manually annotated and grouped the results into broader categories based on cell types and origin of tissue. The figures included all the significant transcription factors that were enriched in at least one of the relevant comparisons. The cutoff was the p-values  $< 0.05$  as previously described(12). The whole enrichment results together with their original and curated annotations are presented in **SI Appendix, Table S4**.

### ***Cell Composition Estimation***

A reference-based cell estimation approach was utilized to estimate proportions of six blood cell types: neutrophils, monocytes, CD4+ T cells, CD8+ T cells, B cells, and NK cells, as previously described (13-15). In summary, whole genome bisulfite sequencing (WGBS) methylomes were obtained from the Blueprint Epigenome Project (16). In total, 34 methylation profiles were analyzed from venous blood-derived cell types (**SI Appendix, Table S5**). First, to process the reference dataset, we used a sliding window to aggregate the methylation values into regions composed of at least two CpG loci that have similar methylation ( $\leq 25\%$  methylation difference) and are within 500bp distance from each other. Second, cell-specific regions were selected that were uniquely hypomethylated in one cell type by at least 30% than all other cell types. An exception to this criteria were CD4+ and CD8+ T cells which because of their similarity led to a dearth of unique regions, therefore additional regions specific to T cells as a whole and regions at least 30% methylation difference between CD4+ and CD8+ T cells were also included. As a result, 145 cell-specific hypomethylated regions were selected and these regions represented 1075 reference CpG loci (**SI Appendix, Fig. S4**). Second, a non-negative least squares regression was

performed on the methylation values of the cell-specific regions of the references and samples to estimate the proportion of each cell type within the samples.

## Figures

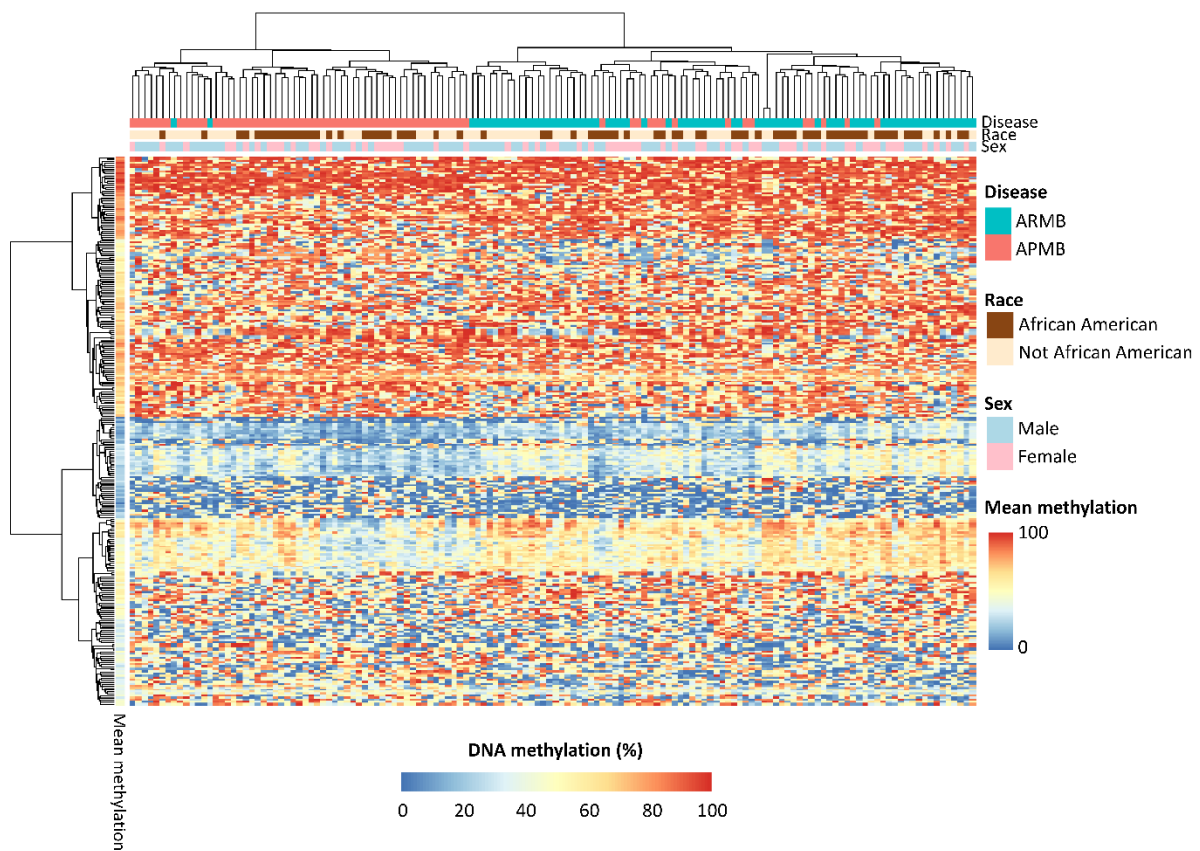

**Figure S1.** DNA methylation levels were analyzed after sex, race and batch correction. The clustered heatmap for the corrected DNA methylation levels of DMS (row) detected within each sample (column) were generated based on the Ward.D2 method. The standardized methylation levels were applied and present in Figure 1.

**A**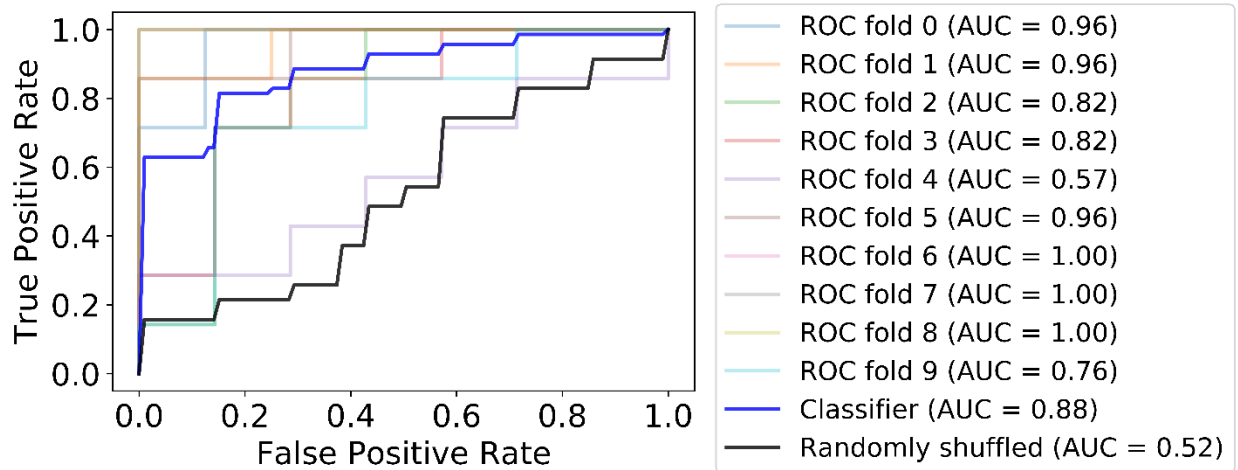**B**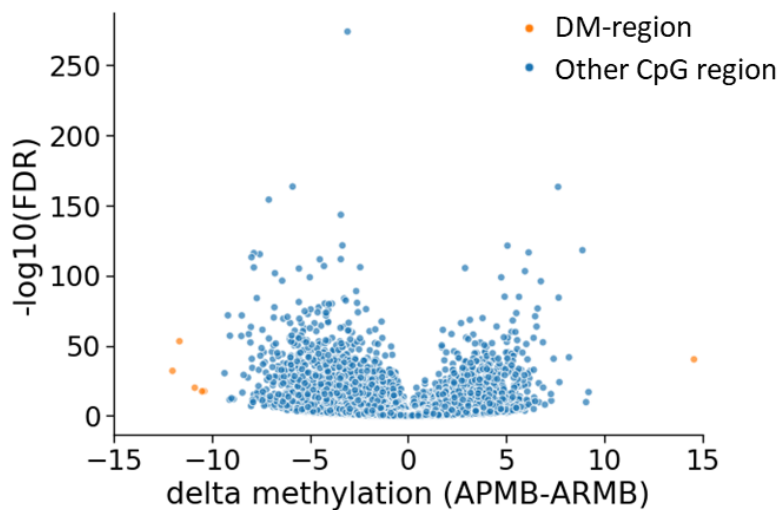

**Figure S2.** Study differential DNA methylation patterns using clustered CpG regions. **A** ROC curve summarizes the test set classification performance (estimated by 10-fold cross validation) of a logistic regression model that uses the DNA methylation levels of 126,144 CpG regions to distinguish APMB and ARMB samples. **B** Volcano plot represents the methylation difference for 126,144 CpG regions by delta methylation (%) and  $-\log_{10}$  adjusted p-value (FDR) generated from methylkit. The cut-off to define DMS (orange dot) was set as  $\text{FDR} < 0.01$  and  $|\text{delta methylation}| > 10\%$ .

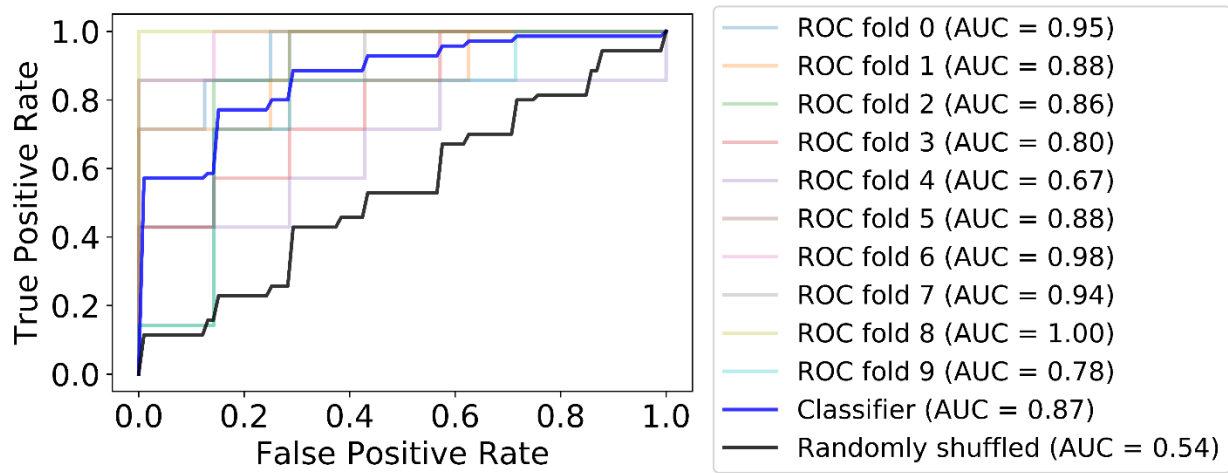

**Figure S3.** Cell-type composition played a moderate effect on the APMB classification. ROC curve of the logistic regression model that uses the DNA methylation levels of 749,212 CpG sites and 6 estimated cell-type proportions to distinguish APMB and ARMB samples.

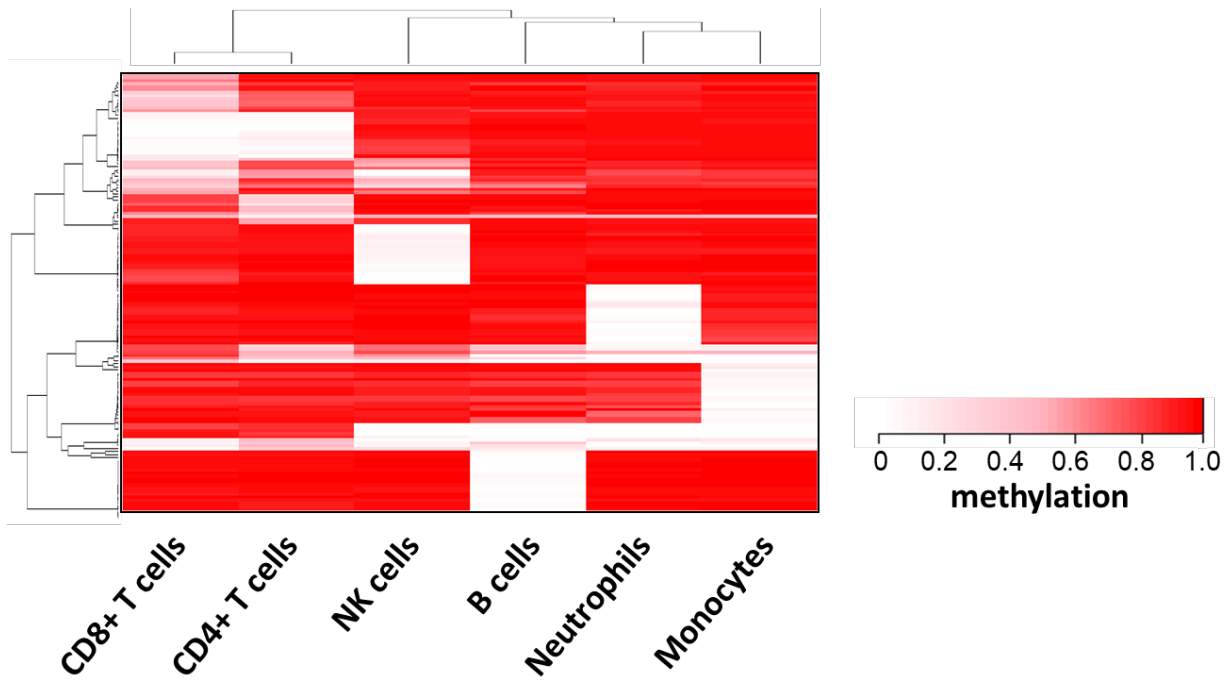

**Figure S4.** Hierarchical clustering of cell-specific methylation across the purified cell references used for estimation of cell quantity in all samples. The average methylation value for each region (rows) from the designated cell type (columns) is depicted.

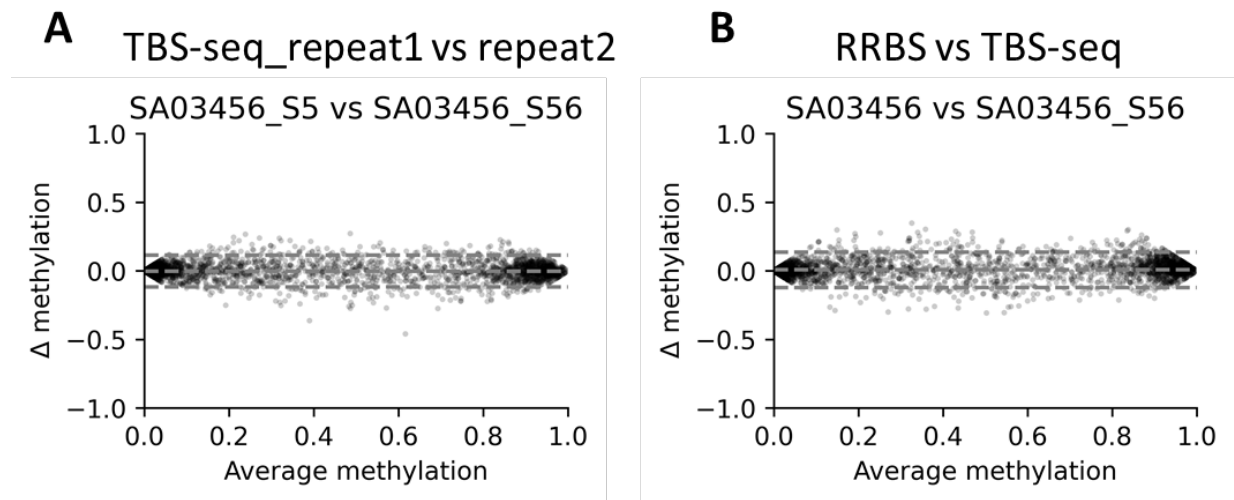

**Figure S5.** Bland-Altman plots demonstrated the good intra-sample correlations among **A** two technical replicates from TBS-seq; **B** two techniques, TBS-seq and RRBS; **A and B** A total of 3614 detected sites were presented. (Representative sample)

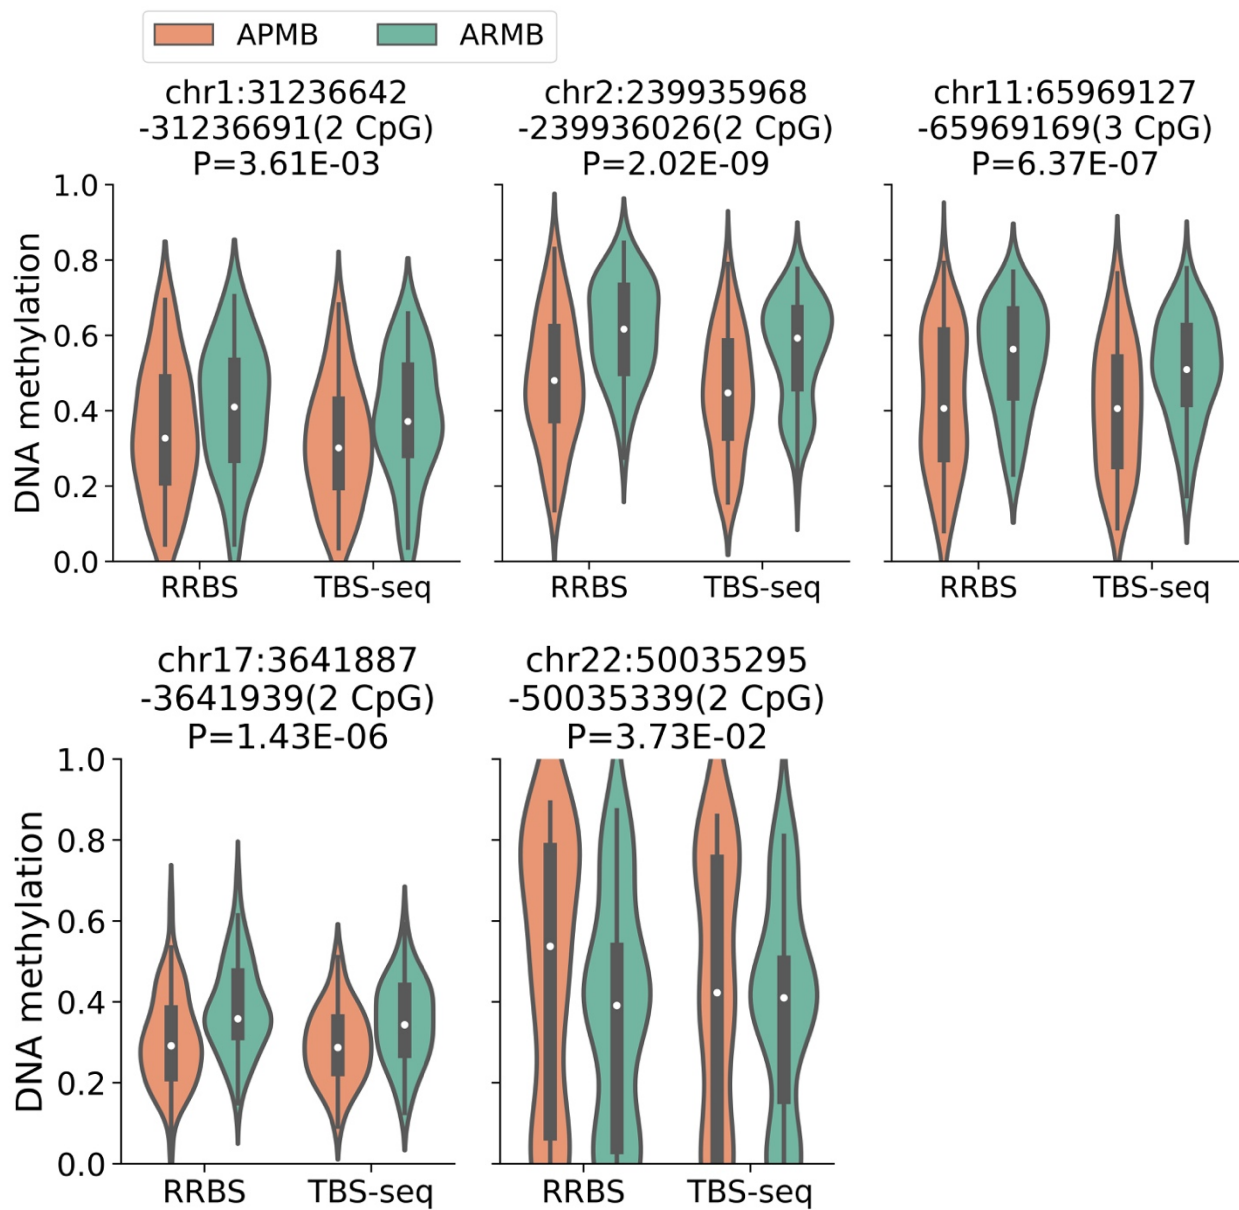

**Figure S6.** Violin plots of methylation levels in RRBS and TBS-seq for DMR reported in Table S3. Numbers of CpG included within the regions were indicated. Two-way ANOVA was used to determine the disease associated (p-value shown).



**Table S1. DMS identified from MethyKit**

| Chromosome coordinate<br>(GRCh38/Hg38) | p-value   | FDR-adjusted<br>p-value | Delta methylation<br>(APMB-ARMB) |
|----------------------------------------|-----------|-------------------------|----------------------------------|
| chr1:2036515                           | 5.98E-28  | 1.36E-24                | -10.59                           |
| chr1:3556781                           | 1.53E-28  | 3.68E-25                | 12.15                            |
| chr1:13525959                          | 3.34E-17  | 1.83E-14                | -10.03                           |
| chr1:18407222                          | 1.32E-20  | 1.20E-17                | -10.26                           |
| chr1:20410039                          | 1.32E-45  | 1.71E-41                | 10.49                            |
| chr1:21943065                          | 5.37E-51  | 1.09E-46                | 13.21                            |
| chr1:22001786                          | 6.51E-38  | 4.10E-34                | -11.66                           |
| chr1:25046088                          | 1.90E-17  | 1.09E-14                | 10.65                            |
| chr1:28097690                          | 9.30E-21  | 8.60E-18                | -10.53                           |
| chr1:31236690                          | 5.76E-25  | 9.46E-22                | -11.66                           |
| chr1:34031251                          | 2.33E-21  | 2.33E-18                | 10.84                            |
| chr1:54748336                          | 1.75E-64  | 9.36E-60                | -18.85                           |
| chr1:58814495                          | 7.52E-25  | 1.21E-21                | -12.11                           |
| chr1:64215091                          | 6.62E-29  | 1.69E-25                | -13.46                           |
| chr1:89088798                          | 4.37E-30  | 1.31E-26                | -10.39                           |
| chr1:106412524                         | 5.23E-34  | 2.14E-30                | -10.12                           |
| chr1:116982836                         | 1.09E-28  | 2.72E-25                | -12.11                           |
| chr1:177964307                         | 3.63E-24  | 5.39E-21                | -11.95                           |
| chr1:201956727                         | 4.95E-111 | 1.85E-105               | -20.79                           |
| chr1:206797125                         | 4.87E-29  | 1.28E-25                | -10.82                           |
| chr1:232531806                         | 6.40E-28  | 1.44E-24                | -11.92                           |
| chr1:243267458                         | 1.50E-29  | 4.25E-26                | -13.03                           |
| chr1:246696421                         | 3.86E-16  | 1.77E-13                | -10.05                           |
| chr1:248804251                         | 7.22E-20  | 6.02E-17                | -11.59                           |
| chr10:3515012                          | 8.28E-28  | 1.85E-24                | 10.38                            |
| chr10:56911268                         | 8.98E-21  | 8.32E-18                | 10.05                            |
| chr10:75108239                         | 3.55E-15  | 1.37E-12                | -10.11                           |
| chr10:94360188                         | 1.27E-48  | 2.02E-44                | 10.84                            |
| chr10:94368118                         | 2.96E-55  | 7.39E-51                | 15.99                            |
| chr10:101037017                        | 2.61E-30  | 7.99E-27                | 12.45                            |
| chr10:103361885                        | 4.28E-22  | 4.82E-19                | -11.25                           |
| chr10:110736940                        | 6.44E-43  | 6.27E-39                | -10.19                           |
| chr10:125835395                        | 3.32E-29  | 8.99E-26                | 10.92                            |
| chr11:10901923                         | 2.24E-40  | 1.88E-36                | 15.02                            |
| chr11:57663997                         | 2.92E-35  | 1.37E-31                | -11.43                           |
| chr11:65969127                         | 1.21E-36  | 6.79E-33                | -12.77                           |
| chr11:65969132                         | 1.26E-31  | 4.33E-28                | -12.10                           |
| chr11:65969168                         | 1.41E-27  | 3.08E-24                | -10.40                           |
| chr11:70457091                         | 5.18E-27  | 1.07E-23                | -14.59                           |
| chr11:71306949                         | 7.89E-61  | 3.11E-56                | 13.21                            |
| chr11:71478444                         | 7.24E-27  | 1.47E-23                | -10.17                           |
| chr11:71478468                         | 3.28E-27  | 6.90E-24                | -10.12                           |
| chr11:72465345                         | 1.74E-25  | 2.98E-22                | 11.31                            |

|                 |          |          |        |
|-----------------|----------|----------|--------|
| chr11:72685944  | 3.11E-19 | 2.35E-16 | 10.23  |
| chr11:97011585  | 1.69E-16 | 8.18E-14 | 10.30  |
| chr11:104278040 | 4.40E-58 | 1.37E-53 | 11.78  |
| chr11:117838312 | 1.46E-72 | 1.22E-67 | 12.38  |
| chr11:126186929 | 4.06E-47 | 5.73E-43 | -13.39 |
| chr11:134843845 | 1.44E-25 | 2.50E-22 | 12.65  |
| chr12:9222322   | 7.68E-27 | 1.55E-23 | -10.25 |
| chr12:11884467  | 1.37E-26 | 2.70E-23 | -10.77 |
| chr12:14441806  | 4.27E-18 | 2.68E-15 | -10.82 |
| chr12:19422599  | 1.09E-16 | 5.49E-14 | -10.29 |
| chr12:38202864  | 4.00E-22 | 4.53E-19 | 11.03  |
| chr12:48520748  | 4.90E-27 | 1.02E-23 | 11.58  |
| chr12:69649244  | 2.15E-70 | 1.61E-65 | 14.71  |
| chr12:87429642  | 8.82E-28 | 1.96E-24 | 11.74  |
| chr12:114730634 | 1.17E-26 | 2.35E-23 | 10.16  |
| chr12:116497224 | 1.45E-45 | 1.84E-41 | -10.72 |
| chr12:124105868 | 8.97E-22 | 9.62E-19 | 11.59  |
| chr12:124301507 | 3.42E-47 | 4.93E-43 | 10.30  |
| chr12:132875488 | 9.85E-32 | 3.45E-28 | -12.04 |
| chr13:23974260  | 5.48E-19 | 3.99E-16 | 11.48  |
| chr13:79097784  | 1.02E-31 | 3.55E-28 | -10.07 |
| chr13:99390832  | 8.03E-49 | 1.34E-44 | 16.50  |
| chr13:109818476 | 2.56E-23 | 3.43E-20 | -11.15 |
| chr13:110452404 | 1.15E-26 | 2.30E-23 | -11.80 |
| chr13:110668271 | 1.25E-30 | 3.94E-27 | 10.29  |
| chr14:39296965  | 5.72E-29 | 1.49E-25 | -13.50 |
| chr14:58447700  | 8.63E-15 | 3.11E-12 | -10.45 |
| chr14:63315206  | 2.15E-53 | 4.87E-49 | -15.52 |
| chr14:64655178  | 9.72E-22 | 1.04E-18 | -11.42 |
| chr14:76160039  | 4.56E-21 | 4.41E-18 | -10.80 |
| chr14:100603571 | 2.75E-26 | 5.15E-23 | -10.48 |
| chr14:100603659 | 1.18E-39 | 9.50E-36 | -11.18 |
| chr14:104285093 | 7.96E-38 | 4.93E-34 | -10.35 |
| chr14:104314729 | 7.38E-59 | 2.51E-54 | 11.14  |
| chr14:104878424 | 4.04E-25 | 6.68E-22 | 10.17  |
| chr15:49947207  | 4.65E-83 | 6.97E-78 | -16.85 |
| chr15:63105996  | 3.58E-20 | 3.09E-17 | 10.03  |
| chr15:85338841  | 1.04E-19 | 8.53E-17 | -10.12 |
| chr15:94317448  | 2.19E-16 | 1.05E-13 | -10.07 |
| chr15:99148275  | 3.09E-17 | 1.71E-14 | -10.80 |
| chr16:3339677   | 5.43E-39 | 3.99E-35 | 12.99  |
| chr16:3339702   | 3.54E-34 | 1.48E-30 | 12.20  |
| chr16:3484891   | 2.64E-17 | 1.49E-14 | 10.14  |
| chr16:9574393   | 7.68E-28 | 1.72E-24 | 10.10  |
| chr16:11135755  | 1.95E-19 | 1.53E-16 | -11.68 |
| chr16:12584582  | 1.30E-28 | 3.18E-25 | 11.40  |
| chr16:14283074  | 1.02E-20 | 9.36E-18 | -10.71 |

|                |          |          |        |
|----------------|----------|----------|--------|
| chr16:17134510 | 2.22E-27 | 4.75E-24 | 13.38  |
| chr16:51108332 | 3.62E-58 | 1.18E-53 | 10.58  |
| chr16:55760866 | 1.29E-32 | 4.72E-29 | -10.84 |
| chr16:55760868 | 1.08E-32 | 4.02E-29 | -11.03 |
| chr16:57893654 | 1.48E-25 | 2.56E-22 | -10.02 |
| chr16:59532978 | 6.33E-40 | 5.21E-36 | 10.22  |
| chr16:76048126 | 6.81E-34 | 2.77E-30 | 14.88  |
| chr16:79167175 | 9.22E-45 | 1.06E-40 | 12.43  |
| chr16:84434719 | 6.71E-47 | 9.31E-43 | -12.30 |
| chr16:87808561 | 4.08E-24 | 6.02E-21 | -10.25 |
| chr16:88909597 | 3.44E-18 | 2.19E-15 | -11.10 |
| chr17:493917   | 2.33E-18 | 1.50E-15 | -11.10 |
| chr17:1469598  | 2.34E-26 | 4.43E-23 | -12.07 |
| chr17:3641887  | 3.08E-21 | 3.05E-18 | -10.96 |
| chr17:3641938  | 9.57E-34 | 3.83E-30 | -10.31 |
| chr17:31512677 | 1.36E-30 | 4.26E-27 | -13.57 |
| chr17:32183905 | 1.21E-25 | 2.13E-22 | -10.41 |
| chr17:50612438 | 1.13E-33 | 4.50E-30 | -12.30 |
| chr17:55270937 | 1.42E-31 | 4.81E-28 | -11.68 |
| chr17:55434242 | 1.40E-56 | 3.76E-52 | 12.96  |
| chr17:64832779 | 5.08E-50 | 9.06E-46 | 12.26  |
| chr17:67273601 | 4.41E-60 | 1.57E-55 | 14.01  |
| chr17:75988992 | 7.20E-36 | 3.62E-32 | -10.30 |
| chr17:76521054 | 5.49E-23 | 7.03E-20 | -10.26 |
| chr17:76532692 | 1.31E-16 | 6.45E-14 | -10.11 |
| chr17:79453012 | 1.01E-44 | 1.14E-40 | 13.54  |
| chr17:81071756 | 7.54E-17 | 3.88E-14 | 10.55  |
| chr17:81501247 | 1.39E-38 | 9.81E-35 | 10.97  |
| chr18:514511   | 5.79E-38 | 3.81E-34 | -10.77 |
| chr18:8478171  | 5.58E-63 | 2.61E-58 | -12.25 |
| chr18:9689202  | 1.84E-47 | 2.70E-43 | -11.62 |
| chr18:10128034 | 1.37E-61 | 6.02E-57 | -12.24 |
| chr18:12747013 | 1.91E-21 | 1.94E-18 | -11.09 |
| chr18:14224865 | 4.13E-55 | 9.98E-51 | -14.91 |
| chr18:29179128 | 6.22E-39 | 4.53E-35 | -10.47 |
| chr18:44127233 | 4.19E-20 | 3.58E-17 | -10.40 |
| chr18:68625631 | 4.19E-27 | 8.72E-24 | -11.37 |
| chr18:79320288 | 3.78E-15 | 1.45E-12 | 10.03  |
| chr19:502553   | 2.82E-35 | 1.33E-31 | 10.89  |
| chr19:660423   | 8.27E-31 | 2.65E-27 | 10.42  |
| chr19:1012120  | 2.02E-57 | 5.61E-53 | 10.10  |
| chr19:1882286  | 5.73E-26 | 1.04E-22 | 10.08  |
| chr19:4735650  | 6.02E-19 | 4.33E-16 | 10.02  |
| chr19:8111756  | 3.00E-20 | 2.62E-17 | 11.63  |
| chr19:9708272  | 8.15E-18 | 4.91E-15 | -10.70 |
| chr19:9708293  | 1.08E-16 | 5.44E-14 | -10.44 |
| chr19:14554121 | 1.65E-19 | 1.30E-16 | 10.72  |

|                |          |          |        |
|----------------|----------|----------|--------|
| chr19:17846094 | 6.34E-26 | 1.14E-22 | -10.77 |
| chr19:18453069 | 1.60E-69 | 1.09E-64 | 14.90  |
| chr19:35785184 | 1.58E-26 | 3.07E-23 | -11.97 |
| chr19:40289873 | 2.16E-24 | 3.29E-21 | -11.10 |
| chr19:44110849 | 1.28E-68 | 7.97E-64 | 11.33  |
| chr19:47385025 | 2.93E-39 | 2.24E-35 | -10.77 |
| chr19:48573344 | 2.20E-44 | 2.39E-40 | 10.92  |
| chr19:48573429 | 1.04E-25 | 1.83E-22 | 11.04  |
| chr19:48864414 | 1.15E-29 | 3.31E-26 | -10.91 |
| chr19:53984703 | 1.33E-22 | 1.61E-19 | 12.28  |
| chr19:57736140 | 3.03E-50 | 5.67E-46 | 12.00  |
| chr2:1267654   | 3.35E-23 | 4.38E-20 | 10.60  |
| chr2:1269996   | 6.61E-17 | 3.44E-14 | 10.42  |
| chr2:10274802  | 1.55E-34 | 6.67E-31 | -11.33 |
| chr2:24879194  | 6.87E-58 | 2.06E-53 | -14.41 |
| chr2:24879198  | 3.96E-30 | 1.20E-26 | -14.23 |
| chr2:24879200  | 7.52E-31 | 2.43E-27 | -14.82 |
| chr2:24879238  | 1.99E-25 | 3.39E-22 | -13.51 |
| chr2:24879268  | 2.33E-25 | 3.94E-22 | -13.59 |
| chr2:28545482  | 4.18E-44 | 4.35E-40 | 13.62  |
| chr2:107392572 | 1.03E-52 | 2.27E-48 | -10.81 |
| chr2:111716295 | 2.03E-28 | 4.81E-25 | 11.73  |
| chr2:112308828 | 1.93E-24 | 2.94E-21 | -11.60 |
| chr2:127631768 | 1.79E-25 | 3.08E-22 | -12.40 |
| chr2:187638001 | 1.31E-26 | 2.59E-23 | 12.58  |
| chr2:205806274 | 5.98E-37 | 3.45E-33 | 12.06  |
| chr2:227667841 | 4.80E-36 | 2.49E-32 | 12.76  |
| chr2:233485840 | 1.44E-22 | 1.73E-19 | 10.76  |
| chr2:239374107 | 1.26E-81 | 1.57E-76 | -11.41 |
| chr2:239935968 | 9.79E-35 | 4.26E-31 | -11.95 |
| chr2:239936025 | 4.06E-42 | 3.81E-38 | -11.56 |
| chr2:241768418 | 9.56E-39 | 6.82E-35 | 12.02  |
| chr20:37033404 | 4.50E-39 | 3.37E-35 | 11.22  |
| chr20:37033434 | 1.70E-40 | 1.45E-36 | 11.44  |
| chr20:56487815 | 2.03E-27 | 4.35E-24 | 10.83  |
| chr20:56958543 | 5.37E-51 | 1.09E-46 | -14.91 |
| chr20:62887880 | 2.29E-21 | 2.30E-18 | 12.73  |
| chr21:13373641 | 9.03E-38 | 5.55E-34 | -14.33 |
| chr21:34595581 | 2.05E-21 | 2.08E-18 | -12.65 |
| chr21:41550703 | 1.83E-44 | 2.01E-40 | 11.91  |
| chr21:43842363 | 9.01E-17 | 4.59E-14 | -10.17 |
| chr21:45386566 | 1.16E-39 | 9.43E-36 | 12.19  |
| chr22:17230982 | 9.26E-44 | 9.25E-40 | 13.20  |
| chr22:30858049 | 1.88E-21 | 1.91E-18 | -10.04 |
| chr22:30922757 | 9.78E-54 | 2.29E-49 | -18.26 |
| chr22:37697965 | 4.46E-83 | 6.97E-78 | -17.62 |
| chr22:44396248 | 1.90E-33 | 7.42E-30 | 10.63  |

|                |          |          |        |
|----------------|----------|----------|--------|
| chr22:45585413 | 1.16E-21 | 1.22E-18 | 11.52  |
| chr22:45585505 | 4.47E-43 | 4.41E-39 | 16.64  |
| chr22:45585567 | 7.92E-35 | 3.49E-31 | 12.37  |
| chr22:46806142 | 1.17E-28 | 2.89E-25 | -12.38 |
| chr22:49017306 | 3.72E-15 | 1.43E-12 | 10.68  |
| chr22:49164475 | 1.75E-35 | 8.37E-32 | 10.27  |
| chr22:50035295 | 6.08E-38 | 3.93E-34 | 13.52  |
| chr22:50035338 | 4.90E-34 | 2.03E-30 | 15.14  |
| chr22:50692955 | 1.26E-48 | 2.02E-44 | -11.62 |
| chr3:54626248  | 4.03E-19 | 2.98E-16 | -10.75 |
| chr3:58123434  | 3.06E-27 | 6.46E-24 | -14.13 |
| chr3:70439711  | 5.39E-35 | 2.43E-31 | -10.89 |
| chr3:103234006 | 6.24E-46 | 8.50E-42 | -12.98 |
| chr3:138896490 | 8.64E-32 | 3.04E-28 | -12.30 |
| chr3:138920773 | 7.77E-41 | 7.01E-37 | 11.81  |
| chr3:156221516 | 2.25E-19 | 1.75E-16 | 10.83  |
| chr3:156221548 | 1.68E-36 | 9.11E-33 | 10.90  |
| chr3:160954639 | 1.86E-37 | 1.12E-33 | -16.10 |
| chr3:170190991 | 9.16E-26 | 1.63E-22 | 10.69  |
| chr3:170923555 | 1.58E-31 | 5.30E-28 | -10.24 |
| chr3:197547814 | 4.21E-25 | 6.95E-22 | -11.41 |
| chr4:1533561   | 3.24E-19 | 2.44E-16 | 11.55  |
| chr4:8286793   | 1.27E-19 | 1.02E-16 | -11.36 |
| chr4:9761350   | 1.23E-45 | 1.62E-41 | 12.03  |
| chr4:54650215  | 3.39E-33 | 1.30E-29 | -10.66 |
| chr4:55447223  | 5.51E-27 | 1.14E-23 | -12.66 |
| chr4:72534065  | 1.25E-22 | 1.52E-19 | -11.63 |
| chr4:108399799 | 1.97E-23 | 2.66E-20 | -10.44 |
| chr4:131141731 | 4.25E-31 | 1.39E-27 | 10.83  |
| chr4:184933072 | 1.23E-63 | 6.16E-59 | -13.68 |
| chr4:187958977 | 1.22E-23 | 1.70E-20 | -11.10 |
| chr4:189266846 | 5.65E-35 | 2.54E-31 | -13.94 |
| chr5:18672185  | 3.88E-44 | 4.09E-40 | 11.78  |
| chr5:33549454  | 2.69E-23 | 3.59E-20 | 10.56  |
| chr5:36364346  | 5.15E-38 | 3.42E-34 | 10.51  |
| chr5:119849603 | 4.65E-37 | 2.70E-33 | 10.49  |
| chr5:173795168 | 3.64E-18 | 2.31E-15 | -10.08 |
| chr5:177082849 | 1.30E-26 | 2.57E-23 | -10.62 |
| chr5:177223143 | 8.20E-19 | 5.73E-16 | -10.63 |
| chr5:177386403 | 3.89E-27 | 8.12E-24 | -11.58 |
| chr5:180771485 | 8.89E-41 | 7.93E-37 | -10.48 |
| chr6:8449026   | 4.43E-36 | 2.32E-32 | -13.21 |
| chr6:15219516  | 3.57E-39 | 2.70E-35 | -10.05 |
| chr6:26309151  | 3.29E-33 | 1.27E-29 | -10.17 |
| chr6:36458313  | 1.26E-30 | 3.98E-27 | 11.50  |
| chr6:37519993  | 8.03E-44 | 8.13E-40 | 12.13  |
| chr6:38881770  | 1.40E-50 | 2.70E-46 | -16.78 |

|                |          |          |        |
|----------------|----------|----------|--------|
| chr6:110595457 | 1.18E-21 | 1.24E-18 | -11.25 |
| chr6:118946385 | 3.18E-31 | 1.05E-27 | 12.15  |
| chr6:139771822 | 3.09E-29 | 8.39E-26 | -10.30 |
| chr6:155256689 | 8.97E-21 | 8.32E-18 | -10.75 |
| chr6:159316215 | 6.35E-30 | 1.87E-26 | -10.16 |
| chr6:169240434 | 2.56E-55 | 6.62E-51 | 12.14  |
| chr6:170242079 | 1.93E-20 | 1.72E-17 | -10.88 |
| chr6:170248145 | 2.28E-19 | 1.77E-16 | -10.77 |
| chr7:376995    | 1.07E-28 | 2.67E-25 | 11.75  |
| chr7:4116423   | 2.38E-41 | 2.20E-37 | -13.30 |
| chr7:23904440  | 4.79E-33 | 1.81E-29 | 10.68  |
| chr7:28531768  | 3.25E-21 | 3.20E-18 | -11.99 |
| chr7:29645809  | 1.22E-49 | 2.13E-45 | -12.04 |
| chr7:34992017  | 8.53E-39 | 6.15E-35 | 10.68  |
| chr7:66706159  | 5.77E-61 | 2.40E-56 | 11.47  |
| chr7:71174455  | 4.28E-30 | 1.29E-26 | -10.94 |
| chr7:105129213 | 1.33E-19 | 1.06E-16 | -10.62 |
| chr7:149822095 | 5.37E-36 | 2.76E-32 | -12.68 |
| chr7:158279847 | 1.12E-31 | 3.89E-28 | -11.01 |
| chr8:11849347  | 1.23E-21 | 1.28E-18 | 10.30  |
| chr8:29711287  | 1.35E-39 | 1.08E-35 | 11.63  |
| chr8:97813316  | 2.76E-25 | 4.63E-22 | -11.47 |
| chr8:133065543 | 1.73E-38 | 1.20E-34 | -10.47 |
| chr8:142017087 | 1.98E-15 | 7.98E-13 | 10.11  |
| chr8:142765584 | 3.95E-26 | 7.25E-23 | 10.08  |
| chr8:143310432 | 1.23E-52 | 2.63E-48 | 15.21  |
| chr8:144398572 | 2.20E-38 | 1.49E-34 | -16.19 |
| chr9:446276    | 1.35E-30 | 4.24E-27 | -11.54 |
| chr9:27921848  | 1.92E-22 | 2.26E-19 | -12.43 |
| chr9:34539872  | 1.26E-23 | 1.75E-20 | -11.10 |
| chr9:100332543 | 5.47E-32 | 1.95E-28 | -11.85 |
| chr9:106530763 | 1.21E-18 | 8.23E-16 | -10.08 |
| chr9:108616106 | 3.54E-38 | 2.37E-34 | -11.89 |
| chr9:113294725 | 7.56E-37 | 4.32E-33 | -13.67 |
| chr9:119361013 | 8.56E-21 | 7.98E-18 | 11.68  |
| chr9:124096410 | 4.43E-22 | 4.97E-19 | -10.99 |
| chr9:126420976 | 2.02E-18 | 1.32E-15 | -10.17 |
| chr9:132197921 | 1.50E-60 | 5.60E-56 | 13.43  |
| chr9:133708289 | 3.70E-22 | 4.23E-19 | 11.89  |
| chr9:134333485 | 1.00E-65 | 5.77E-61 | -19.32 |
| chr9:134416396 | 2.29E-20 | 2.02E-17 | 10.63  |
| chr9:134690733 | 5.07E-45 | 6.03E-41 | 16.13  |
| chr9:136600128 | 5.52E-18 | 3.40E-15 | 10.21  |
| chr9:137041339 | 2.88E-27 | 6.13E-24 | -10.62 |
| chr9:137265634 | 3.00E-31 | 9.89E-28 | -10.30 |

---

**Table S2. Biological annotation for DMS in GREAT and RegulomeDB**

| Chromosome coordinate of DMS (GRCh38/Hg38) | RegulomeDB score | SNP         | CpG island | The first closest gene to DMS | Distance to the TSS of the first closest gene | The second closest gene to DMS | Distance to the TSS of the second closest gene |
|--------------------------------------------|------------------|-------------|------------|-------------------------------|-----------------------------------------------|--------------------------------|------------------------------------------------|
| chr1:2036515                               | 4                | n/a         | Others     | PRKCZ                         | -13954                                        | GABRD                          | 17175                                          |
| chr1:3556781                               | 5                | n/a         | Others     | MEGF6                         | 54713                                         | ARHGEF16                       | 102356                                         |
| chr1:13525959                              | 6                | rs12031108  | Others     | PDPN                          | -57505                                        | LRR38                          | -11912                                         |
| chr1:18407222                              | 5                | rs6695244   | Others     | KLHDC7A                       | -73707                                        | IGSF21                         | 299477                                         |
| chr1:20410039                              | 5                | rs76402501  | Others     | CAMK2N1                       | 76180                                         | VWASB1                         | 119121                                         |
| chr1:21943065                              | 4                | rs6656791   | Others     | CELA3B                        | -33955                                        | HSPG2                          | -5769                                          |
| chr1:22001786                              | 5                | n/a         | Others     | CELA3A                        | 131                                           |                                |                                                |
| chr1:25046088                              | 2b               | rs12731221  | Others     | RUNX3                         | -81079                                        | SYF2                           | 186404                                         |
| chr1:28097690                              | 5                | rs61786971  | Others     | EYA3                          | -8995                                         | PTAFR                          | 79497                                          |
| chr1:31236690                              | 5                | n/a         | Shores     | PUM1                          | -170996                                       | NKAIN1                         | 2863                                           |
| chr1:34031251                              | 7                | n/a         | Others     | CSMD2                         | 134590                                        | HMGB4                          | 170752                                         |
| chr1:54748336                              | 5                | rs369910060 | Others     | PARS2                         | 16177                                         | ENSG00000271723                | 106537                                         |
| chr1:58814495                              | 2b               | n/a         | Shores     | FGGY                          | -482485                                       | JUN                            | -30383                                         |
| chr1:64215091                              | 7                | rs12081070  | Others     | CACHD1                        | -255700                                       | UBE2U                          | 11285                                          |
| chr1:89088798                              | 4                | n/a         | Others     | GBP1                          | -23439                                        | GBP2                           | 37315                                          |
| chr1:106412524                             | 7                | n/a         | Others     | PRMT6                         | -644154                                       |                                |                                                |
| chr1:116982836                             | 2a               | n/a         | Others     | CD101                         | -18923                                        | PTGFRN                         | 72780                                          |
| chr1:177964307                             | 7                | rs3813651   | Others     | SEC16B                        | 5607                                          | FAM5B                          | 792810                                         |
| chr1:201956727                             | 5                | n/a         | Shores     | RNPEP                         | -25896                                        | TIMM17A                        | 1237                                           |
| chr1:206797125                             | 4                | n/a         | Others     | IL19                          | -1744                                         |                                |                                                |
| chr1:232531806                             | 7                | n/a         | Others     | SIPA1L2                       | 29751                                         | DISC1                          | 904992                                         |
| chr1:243267458                             | 7                | n/a         | Others     | SDCCAG8                       | 11403                                         | AKT3                           | 582669                                         |
| chr1:246696421                             | 4                | n/a         | Others     | SCCPDH                        | -27625                                        | CNST                           | 129976                                         |
| chr1:248804251                             | 5                | n/a         | Others     | OR14I1                        | -252822                                       | ZNF672                         | -34028                                         |
| chr10:3515012                              | 5                | n/a         | Others     | PITRM1                        | -342202                                       | KLF6                           | 270262                                         |
| chr10:56911268                             | 5                | n/a         | Others     | ZWINT                         | -549993                                       |                                |                                                |
| chr10:75108239                             | 5                | n/a         | Shores     | SAMD8                         | -3395                                         | DUSP13                         | 951                                            |
| chr10:94360188                             | 7                | rs12773803  | Shores     | NOC3L                         | 2750                                          | PLCE1                          | 366200                                         |
| chr10:94368118                             | 6                | rs34032820  | Others     | TBC1D12                       | -34385                                        | NOC3L                          | -5180                                          |
| chr10:101037017                            | 5                | n/a         | Others     | KAZALD1                       | -24823                                        | SFXN3                          | 5779                                           |
| chr10:103361885                            | 4                | n/a         | Others     | PCGF6                         | -10752                                        | TAF5                           | -6081                                          |
| chr10:110736940                            | 7                | n/a         | Others     | PDCD4                         | -134866                                       | RBM20                          | 92544                                          |
| chr10:125835395                            | 7                | n/a         | Others     | BCCIP                         | 11850                                         | DHX32                          | 45919                                          |
| chr11:10901923                             | 5                | rs10840511  | Others     | ZBED5                         | -43851                                        | CSNK2A3                        | 451433                                         |
| chr11:57663997                             | 7                | rs1783985   | Shores     | ZDHC5                         | -3898                                         |                                |                                                |
| chr11:65969127                             | 4                | n/a         | Others     | BANF1                         | -32951                                        | SART1                          | 7439                                           |
| chr11:65969132                             | 4                | n/a         | Others     | BANF1                         | -32946                                        | SART1                          | 7444                                           |
| chr11:65969168                             | 4                | n/a         | Others     | BANF1                         | -32910                                        | SART1                          | 7480                                           |
| chr11:70457091                             | 5                | rs3132897   | Others     | CTTN                          | 58550                                         | SHANK2                         | 555175                                         |
| chr11:71306949                             | 2b               | rs1792206   | Others     | SHANK2                        | -159624                                       | DHCR7                          | 141485                                         |
| chr11:71478444                             | 5                | rs201214062 | Others     | KRTAP5-7                      | -48822                                        | NADSYN1                        | 25336                                          |
| chr11:71478468                             | 5                | rs34989018  | Others     | KRTAP5-7                      | -48798                                        | NADSYN1                        | 25360                                          |
| chr11:72465345                             | 7                | rs1984826   | Others     | CLPB                          | -30698                                        | PDE2A                          | 209107                                         |
| chr11:72685944                             | 5                | rs12805218  | Others     | PDE2A                         | -11493                                        | ARAP1                          | 66458                                          |
| chr11:97011585                             | 6                | rs35218107  | Others     | JRKL                          | 759428                                        |                                |                                                |
| chr11:104278040                            | 6                | n/a         | Others     | PDGFD                         | -113934                                       | CASP12                         | 620391                                         |
| chr11:117838312                            | 5                | rs516655    | Others     | FXYD2                         | -13569                                        | FXYD6                          | 38869                                          |
| chr11:126186929                            | 1f               | rs632918    | Others     | CDON                          | -123638                                       | RPUSD4                         | 24762                                          |
| chr11:134843845                            | 5                | rs2846150   | Others     | B3GAT1                        | -451493                                       |                                |                                                |
| chr12:9222322                              | 6                | rs7301059   | Others     | PZP                           | -13953                                        | KLRB1                          | 385563                                         |
| chr12:11884467                             | 5                | n/a         | Others     | BCL2L14                       | -186471                                       | ETV6                           | 234614                                         |
| chr12:14441806                             | 5                | n/a         | Others     | ATF7IP                        | 76125                                         | PLBD1                          | 126542                                         |
| chr12:19422599                             | 7                | n/a         | Others     | AEBP2                         | -17074                                        | PLEKHA5                        | 292832                                         |
| chr12:38202864                             | 6                | rs7301806   | Others     | ALG10B                        | -113713                                       |                                |                                                |
| chr12:48520748                             | 6                | rs11612973  | Others     | OR8S1                         | -4883                                         |                                |                                                |
| chr12:69649244                             | 7                | n/a         | Others     | LRR38                         | -38083                                        | BEST3                          | 50171                                          |
| chr12:87429642                             | 7                | n/a         | Others     | CEP290                        | 712573                                        |                                |                                                |
| chr12:114730634                            | 7                | rs10774764  | Others     | TBX3                          | -47045                                        |                                |                                                |
| chr12:116497224                            | 4                | n/a         | Others     | MED13L                        | -219887                                       | MAP1LC3B2                      | -62156                                         |
| chr12:124105868                            | 5                | rs10128763  | Others     | ZNF664                        | 132745                                        | NCOR2                          | 389383                                         |
| chr12:124301507                            | 5                | rs77263762  | Shores     | NCOR2                         | 193744                                        | ZNF664                         | 328384                                         |
| chr12:132875488                            | 6                | rs11147135  | Others     | GOLGA3                        | -46787                                        | CHFR                           | 12119                                          |
| chr13:23974260                             | 7                | rs372370712 | Others     | C1QTNF9B                      | -77206                                        | SPATA13                        | -5544                                          |
| chr13:79097784                             | 6                | n/a         | Others     | RNF219                        | -438606                                       | RBM26                          | 308003                                         |

|                 |    |             |            |                 |         |                 |         |
|-----------------|----|-------------|------------|-----------------|---------|-----------------|---------|
| chr13:99390832  | 5  | rs7983036   | Others     | TM9SF2          | -110584 | GPR183          | -83428  |
| chr13:109818476 | 5  | rs336229    | Others     | IRS2            | -31909  | COL4A1          | 488672  |
| chr13:110452404 | 7  | rs35131825  | Others     | RAB20           | 109328  | COL4A2          | 145138  |
| chr13:110668271 | 7  | n/a         | Others     | CARS2           | 37885   | CARKD           | 52611   |
| chr14:39296965  | 7  | rs12588386  | Others     | CTAGE5          | 29842   | FBXO33          | 135534  |
| chr14:58447700  | 6  | rs1743728   | Others     | DACT1           | -190478 | TIMM9           | -20087  |
| chr14:63315206  | 7  | rs12232119  | Others     | RHOJ            | 110796  | PPP2R5E         | 228170  |
| chr14:64655178  | 4  | n/a         | Others     | PLEKHG3         | -49257  | PPP1R36         | 105277  |
| chr14:76160039  | 7  | rs1900119   | Others     | ESRRB           | -247498 | GPATCH2L        | 8104    |
| chr14:100603571 | 5  | n/a         | Others     | DLK1            | -123255 | BEGAIN          | -35502  |
| chr14:100603659 | 5  | n/a         | Others     | DLK1            | -123167 | BEGAIN          | -35590  |
| chr14:104285093 | 5  | n/a         | Others     | C14orf180       | -294590 | C14orf144       | 40890   |
| chr14:104314729 | 5  | n/a         | Others     | C14orf180       | -264954 | C14orf144       | 70526   |
| chr14:104878424 | 4  | rs368570320 | Others     | PLD4            | -46398  | CEP170B         | 13112   |
| chr15:49947207  | 7  | n/a         | Others     | ATP8B4          | 172014  | FGF7            | 524112  |
| chr15:63105996  | 5  | rs2134265   | Others     | LACTB           | -15803  | TPM1            | 63312   |
| chr15:85338841  | 7  | n/a         | Others     | AKAP13          | -41887  | PDE8A           | 358402  |
| chr15:94317448  | 5  | n/a         | Others     | MCTP2           | 19183   |                 |         |
| chr15:99148275  | 7  | rs8039020   | Others     | MEF2A           | -417424 | SYNM            | 43195   |
| chr16:3339677   | 6  | n/a         | Others     | TIGD7           | -34033  | OR2C1           | -16211  |
| chr16:3339702   | 6  | rs11642109  | Others     | TIGD7           | -34058  | OR2C1           | -16186  |
| chr16:3484891   | 5  | rs13740     | CpG_island | CLUAP1          | -16032  | NAA60           | 41281   |
| chr16:9574393   | 5  | n/a         | Others     | USP7            | -610910 | GRIN2A          | 608360  |
| chr16:11135755  | 4  | n/a         | Others     | SOCS1           | 120423  | CITA            | 258558  |
| chr16:12584582  | 3a | n/a         | Others     | CPPED1          | 219434  | SNX29           | 607845  |
| chr16:14283074  | 7  | rs189369584 | Shores     | MKL2            | 203787  | PARN            | 347192  |
| chr16:17134510  | 4  | rs12708815  | Others     | XYLT1           | 336370  | NOMO3           | 902016  |
| chr16:51108332  | 7  | rs11644161  | Others     | SALL1           | 42942   | CYLD            | 365573  |
| chr16:55760866  | 5  | n/a         | Others     | CES1            | 72291   | SLC6A2          | 104223  |
| chr16:55760868  | 5  | n/a         | Others     | CES1            | 72289   | SLC6A2          | 104225  |
| chr16:57893654  | 3a | n/a         | Others     | KIFC3           | -91059  | CNGB1           | 77457   |
| chr16:59532978  | 7  | rs7184791   | Others     | GOT2            | -798622 |                 |         |
| chr16:76048126  | 7  | rs160953    | Others     | ENSG00000214325 | -347936 | CNTNAP4         | -261769 |
| chr16:79167175  | 7  | rs1946279   | Others     | MAF             | 433538  |                 |         |
| chr16:84434719  | 7  | n/a         | Others     | ATP2C2          | 66193   | TLDC1           | 70038   |
| chr16:87808561  | 4  | n/a         | Others     | KLHDC4          | -42613  | SLC7A5          | 60926   |
| chr16:88909597  | 5  | rs2549208   | CpG_island | PABPN1L         | -42980  | CBFA2T3         | 67606   |
| chr17:493917    | 5  | n/a         | Shores     | FAM101B         | -101428 | VPS53           | 220938  |
| chr17:1469598   | 4  | n/a         | Shores     | CRK             | -13341  | MYO1C           | 23213   |
| chr17:3641887   | 2a | n/a         | Others     | CTNS            | 5409    | TAX1BP3         | 26794   |
| chr17:3641938   | 4  | rs114273516 | Others     | CTNS            | 5460    | TAX1BP3         | 26743   |
| chr17:31512677  | 5  | rs9910757   | Others     | RAB11FIP4       | 121054  | COPRS           | 346660  |
| chr17:32183905  | 6  | n/a         | Others     | RHBDL3          | -82270  | RHOT1           | 41440   |
| chr17:50612438  | 5  | rs3785914   | Others     | ABCC3           | -22418  | CACNA1G         | 50979   |
| chr17:55270937  | 4  | n/a         | Others     | HLF             | 5926    | MMD             | 151054  |
| chr17:55434242  | 4  | rs9907421   | Others     | MMD             | -12251  | TMEM100         | 297878  |
| chr17:64832779  | 7  | n/a         | Shores     | SMURF2          | -170712 | LRRRC37A3       | 86005   |
| chr17:67273601  | 6  | rs11659146  | Others     | HELZ            | -28419  | PSMD12          | 93025   |
| chr17:75988992  | 7  | rs113617218 | Others     | CDK3            | -12345  | ACOX1           | -9630   |
| chr17:76521054  | 7  | n/a         | Others     | RHBDF2          | -19648  | CYGB            | 16850   |
| chr17:76532692  | 7  | n/a         | Others     | RHBDF2          | -31286  | CYGB            | 5212    |
| chr17:79453012  | 5  | rs12450239  | Others     | RBFOX3          | 29468   | ENGASE          | 378068  |
| chr17:81071756  | 5  | rs35663354  | CpG_island | BAIAP2          | 36595   | AATK            | 94260   |
| chr17:81501247  | 7  | rs8064656   | Shores     | ACTG1           | 11533   | ENSG00000171282 | 94734   |
| chr18:514511    | 5  | rs111692475 | CpG_island | CETN1           | -65855  | COLEC12         | -13790  |
| chr18:8478171   | 5  | n/a         | Others     | RAB12           | -131273 | PTPRM           | 911390  |
| chr18:9689202   | 6  | n/a         | Others     | PPP4R1          | -74644  | RAB31           | -18962  |
| chr18:10128034  | 4  | rs630147    | Shores     | APCDD1          | -326593 | VAPA            | 213973  |
| chr18:12747013  | 5  | n/a         | Others     | CEP76           | -44240  | PTPN2           | 137221  |
| chr18:14224865  | 7  | rs11873382  | Others     | ANKRD30B        | -523374 | ZNF519          | -92436  |
| chr18:29179128  | 6  | rs28737314  | Others     | NONE            |         |                 |         |
| chr18:44127233  | 7  | rs1963128   | Others     | SYT4            | -849584 | SETBP1          | -553664 |
| chr18:68625631  | 6  | rs62099966  | Others     | TMX3            | 89666   |                 |         |
| chr18:79320288  | 5  | n/a         | Others     | NFATC1          | -80047  | ATP9B           | 250895  |
| chr19:502553    | 5  | rs4919835   | Shores     | TPGS1           | -4745   |                 |         |
| chr19:660423    | 4  | n/a         | Shores     | RNF126          | 2853    | FGF22           | 20529   |
| chr19:1012120   | 5  | rs7145      | Shores     | TMEM259         | 8997    | GRIN3B          | 11702   |
| chr19:1882286   | 4  | n/a         | Shores     | KLF16           | -18719  | ABHD17A         | 3146    |
| chr19:4735650   | 7  | rs10411311  | Others     | FEM1A           | -56065  | DPP9            | -11788  |



|                |    |             |            |          |         |          |         |
|----------------|----|-------------|------------|----------|---------|----------|---------|
| chr19:8111756  | 5  | n/a         | Others     | FBN3     | 38089   | CCL25    | 58757   |
| chr19:9708272  | 4  | n/a         | Others     | ZNF812   | -7497   | ZNF846   | 60344   |
| chr19:9708293  | 4  | n/a         | Others     | ZNF812   | -7518   | ZNF846   | 60323   |
| chr19:14554121 | 5  | n/a         | Others     | NDUFB7   | 17940   | TECR     | 24562   |
| chr19:17846094 | 7  | n/a         | Shores     | INSL3    | -24521  | JAK3     | 1937    |
| chr19:18453069 | 6  | rs10405479  | Others     | ISYNA1   | -14769  | ELL      | 69057   |
| chr19:35785184 | 3a | rs199806241 | Others     | ARHGAP33 | 9610    | PRODH2   | 28114   |
| chr19:40289873 | 6  | n/a         | Others     | AKT2     | -4479   |          |         |
| chr19:44110849 | 4  | rs78799625  | Shores     | ZNF225   | -2508   |          |         |
| chr19:47385025 | 7  | n/a         | Others     | MEIS3    | 34262   | DHX34    | 35745   |
| chr19:48573344 | 4  | rs3760800   | Others     | SPACA4   | -33398  | SULT2B1  | 21270   |
| chr19:48573429 | 4  | rs3760802   | Others     | SPACA4   | -33313  | SULT2B1  | 21355   |
| chr19:48864414 | 7  | rs538372    | Others     | HSD17B14 | -27737  | PLEKHA4  | 4217    |
| chr19:53984703 | 5  | rs2362381   | Shores     | CACNG6   | -7584   | CACNG8   | 21664   |
| chr19:57736140 | 7  | rs76147066  | Others     | ZNF776   | -10655  | ZNF671   | -8517   |
| chr2:1267654   | 7  | n/a         | Others     | TPO      | -145806 | SNTG2    | 324873  |
| chr2:1269996   | 7  | n/a         | Others     | TPO      | -143464 | SNTG2    | 327215  |
| chr2:10274802  | 6  | n/a         | Others     | HPCAL1   | -28897  | RRM2     | 152474  |
| chr2:24879194  | 5  | n/a         | Others     | PTRHD1   | -85813  | ADCY3    | 40644   |
| chr2:24879198  | 5  | n/a         | Others     | PTRHD1   | -85817  | ADCY3    | 40640   |
| chr2:24879200  | 5  | n/a         | Others     | PTRHD1   | -85819  | ADCY3    | 40638   |
| chr2:24879238  | 4  | n/a         | Others     | PTRHD1   | -85857  | ADCY3    | 40600   |
| chr2:24879268  | 4  | n/a         | Others     | PTRHD1   | -85887  | ADCY3    | 40570   |
| chr2:28545482  | 4  | rs12467291  | Others     | PPP1CB   | -206369 | PLB1     | 49412   |
| chr2:107392572 | 6  | rs11894951  | Others     | ST6GAL2  | -505927 | RGPD4    | -434364 |
| chr2:111716295 | 5  | n/a         | Others     | ANAPC1   | 168394  | BCL2L11  | 595367  |
| chr2:112308828 | 6  | rs7564052   | Others     | ZC3H6    | 33235   | RGPD8    | 124816  |
| chr2:127631768 | 5  | rs200293641 | Others     | GPR17    | -14095  | MYO7B    | 95966   |
| chr2:187638001 | 5  | n/a         | Others     | GULP1    | -654830 | TFPI     | -83510  |
| chr2:205806274 | 4  | rs10932128  | Others     | NRP2     | 123775  | INO80D   | 279907  |
| chr2:227667841 | 7  | rs6436725   | Others     | C2orf83  | -34670  | SLC19A3  | 50170   |
| chr2:233485840 | 5  | rs1048603   | Others     | USP40    | 79749   | DGKD     | 131334  |
| chr2:239374107 | 7  | rs114465705 | Others     | HDAC4    | 26840   | TWIST2   | 539130  |
| chr2:239935968 | 4  | n/a         | Shores     | HDAC4    | -552743 | NDUFA10  | 89433   |
| chr2:239936025 | 4  | n/a         | Shores     | HDAC4    | -552800 | NDUFA10  | 89376   |
| chr2:241768418 | 4  | n/a         | Shores     | GAL3ST2  | -8406   | D2HGDH   | 33840   |
| chr20:37033404 | 7  | n/a         | Others     | SAMHD1   | -81562  | RBL1     | 62590   |
| chr20:37033434 | 6  | n/a         | Others     | SAMHD1   | -81592  | RBL1     | 62560   |
| chr20:56487815 | 7  | n/a         | Others     | FAM209A  | -36670  | RTFDC1   | 19225   |
| chr20:56958543 | 6  | n/a         | Others     | BMP7     | 308084  | TFAP2C   | 329242  |
| chr20:62887880 | 2b | n/a         | Others     | TCFL5    | -26118  | DIDO1    | 50041   |
| chr21:13373641 | 5  | rs55923962  | Others     | POTED    | -236535 |          |         |
| chr21:34595581 | 2b | n/a         | Others     | KCNE1    | -84267  | RCAN1    | 19561   |
| chr21:41550703 | 7  | rs61614992  | Others     | TMPRSS2  | -42639  | RIPK4    | 264635  |
| chr21:43842363 | 5  | n/a         | Others     | AGPAT3   | -82644  | RRP1     | 52851   |
| chr21:45386566 | 2b | n/a         | Others     | POFUT2   | -98669  | COL18A1  | -68921  |
| chr22:17230982 | 5  | rs5748969   | Others     | CECR2    | -244754 | CECR1    | -8994   |
| chr22:30858049 | 5  | n/a         | Others     | MORC2    | 110150  | OSBP2    | 163244  |
| chr22:30922757 | 5  | n/a         | Shores     | MORC2    | 45442   | OSBP2    | 227952  |
| chr22:37697965 | 6  | n/a         | Others     | TRIOBP   | 962     |          |         |
| chr22:44396248 | 5  | n/a         | Others     | PRR5     | -280836 | KIAA1644 | -83398  |
| chr22:45585413 | 4  | rs3788659   | Others     | ATXN10   | -86385  | FBLN1    | 82523   |
| chr22:45585505 | 4  | rs141579499 | Others     | ATXN10   | -86293  | FBLN1    | 82615   |
| chr22:45585567 | 2b | n/a         | Others     | ATXN10   | -86231  | FBLN1    | 82677   |
| chr22:46806142 | 4  | n/a         | Others     | TBC1D22A | 43522   |          |         |
| chr22:49017306 | 4  | rs2318433   | Others     | FAM19A5  | 527847  | BRD1     | 805333  |
| chr22:49164475 | 5  | n/a         | Shores     | BRD1     | 657964  | FAM19A5  | 675216  |
| chr22:50035295 | 5  | rs181659854 | Shores     | TLL8     | 21639   | PIM3     | 119564  |
| chr22:50035338 | 5  | n/a         | Shores     | TLL8     | 21596   | PIM3     | 119607  |
| chr22:50692955 | 7  | rs4428117   | Others     | ACR      | -45240  | SHANK3   | 18314   |
| chr3:54626248  | 5  | rs595993    | CpG_island | LRTM1    | 301825  | CACNA2D3 | 503583  |
| chr3:58123434  | 4  | rs1131356   | CpG_island | DNASE1L3 | 91236   | FLNB     | 115035  |
| chr3:70439711  | 7  | n/a         | Others     | FOXP1    | 691125  | MITF     | 700277  |
| chr3:103234006 | 6  | rs9683380   | Others     | ZPLD1    | 798992  |          |         |
| chr3:138896490 | 7  | rs12485482  | Others     | PIK3CB   | -61739  | FOXO2    | 50649   |
| chr3:138920773 | 7  | rs11720941  | Others     | PIK3CB   | -86022  | FOXO2    | 26366   |
| chr3:156221516 | 7  | rs11915832  | Others     | KCNAB1   | 100969  | SSR3     | 333667  |
| chr3:156221548 | 7  | n/a         | Others     | KCNAB1   | 101001  | SSR3     | 333635  |
| chr3:160954639 | 5  | n/a         | Others     | B3GALNT1 | 150711  | PPM1L    | 198432  |

|                |    |             |        |          |         |          |         |
|----------------|----|-------------|--------|----------|---------|----------|---------|
| chr3:170190991 | 7  | n/a         | Others | PRKCI    | -31373  | PHC3     | -9245   |
| chr3:170923555 | 7  | n/a         | Others | EIF5A2   | -14863  | SLC2A2   | 103194  |
| chr3:197547814 | 2b | n/a         | Others | DLG1     | -249239 | BDH1     | 8172    |
| chr4:1533561   | 4  | n/a         | Shores | NKX1-1   | -135170 | FAM53A   | 150699  |
| chr4:8286793   | 5  | rs7692567   | Others | HTRA3    | 17029   | ACOX3    | 153917  |
| chr4:9761350   | 5  | rs13140817  | Others | DRD5     | -20283  | DEFB131  | 316715  |
| chr4:54650215  | 6  | rs34269143  | Others | KIT      | -7702   | PDGFRA   | 421119  |
| chr4:55447223  | 5  | n/a         | Others | TMEM165  | 51267   | CLOCK    | 62803   |
| chr4:72534065  | 7  | n/a         | Others | ADAMTS3  | 34733   | NPFFR2   | 502262  |
| chr4:108399799 | 5  | rs219455    | Others | LEF1     | -231378 | RPL34    | -220856 |
| chr4:131141731 | 7  | rs7693301   | Others | NONE     |         |          |         |
| chr4:184933072 | 7  | rs6841615   | Others | ACSL1    | -106255 | HELT     | -85856  |
| chr4:187958977 | 6  | rs113110760 | Others | ZFP42    | -36793  |          |         |
| chr4:189266846 | 7  | rs11942078  | Others | FRG1     | -673942 |          |         |
| chr5:18672185  | 7  | rs62348334  | Others | NONE     |         |          |         |
| chr5:33549454  | 5  | n/a         | Others | TARS     | 108489  | ADAMTS12 | 342737  |
| chr5:36364346  | 6  | n/a         | Others | SLC1A3   | -242008 | RANBP3L  | -62447  |
| chr5:119849603 | 7  | n/a         | Others | FAM170A  | 220006  |          |         |
| chr5:173795168 | 4  | n/a         | Others | BOD1     | -178509 | CPEB4    | -93111  |
| chr5:177082849 | 7  | rs384250    | Shores | FGFR4    | -4036   |          |         |
| chr5:177223143 | 5  | n/a         | Others | RAB24    | 80564   | NSD1     | 89219   |
| chr5:177386403 | 5  | rs368438452 | Others | SLC34A1  | 1960    | PFN3     | 14232   |
| chr5:180771485 | 7  | rs112065232 | Others | OR2Y1    | -31387  | MGAT1    | 38343   |
| chr6:8449026   | 7  | rs1855767   | Others | SLC35B3  | -13544  |          |         |
| chr6:15219516  | 5  | n/a         | Others | JARID2   | -26779  |          |         |
| chr6:26309151  | 6  | rs9393700   | Others | BTN3A2   | -56079  | HIST1H4H | -23618  |
| chr6:36458313  | 6  | n/a         | Others | PXT1     | -15425  | STK38    | 89156   |
| chr6:37519993  | 6  | rs4714072   | Others | CCDC167  | -20072  | MDGA1    | 177996  |
| chr6:38881770  | 7  | rs862428    | Others | GLP1R    | -167027 | DNAH8    | 158649  |
| chr6:110595457 | 6  | n/a         | Others | SLC22A16 | -118817 | CDK19    | 219858  |
| chr6:118946385 | 7  | rs9374764   | Others | MCM9     | -11224  | FAM184A  | 132357  |
| chr6:139771822 | 4  | n/a         | Others | CITED2   | -397203 |          |         |
| chr6:155256689 | 5  | n/a         | Others | CLDN20   | -7323   | TIAM2    | 423993  |
| chr6:159316215 | 5  | n/a         | Shores | FNDC1    | 146819  | SOD2     | 377112  |
| chr6:169240434 | 5  | n/a         | Shores | THBS2    | 13609   | SMOC2    | 798699  |
| chr6:170242079 | 6  | rs7772458   | Others | DLL1     | 48393   | C6orf70  | 399447  |
| chr6:170248145 | 5  | rs2983214   | Others | DLL1     | 42327   | C6orf70  | 405513  |
| chr7:376995    | 5  | rs146197992 | Shores | PDGFA    | 142069  | FAM20C   | 223993  |
| chr7:4116423   | 5  | n/a         | Shores | FOKK1    | -565884 | SDK1     | 814976  |
| chr7:23904440  | 7  | rs61512807  | Others | NPY      | -379747 | STK31    | 194274  |
| chr7:28531768  | 7  | n/a         | Others | CHN2     | -662641 | CREB5    | 119243  |
| chr7:29645809  | 7  | rs117988574 | Shores | WIPF3    | -188915 | PRR15    | 81999   |
| chr7:34992017  | 1f | rs2023328   | Others | DPY19L1  | 46023   | NPSR1    | 333733  |
| chr7:66706159  | 7  | n/a         | Others | KCTD7    | -34496  | TPST1    | 500961  |
| chr7:71174455  | 6  | n/a         | Others | WBSCR17  | 42287   |          |         |
| chr7:105129213 | 7  | rs113117338 | Others | KMT2E    | 115035  | SRPK2    | 259680  |
| chr7:149822095 | 5  | n/a         | Others | ZNF467   | -48617  | ZNF862   | -16271  |
| chr7:158279847 | 5  | rs13231012  | Others | PTPRN2   | 307831  | DNAJB6   | 942880  |
| chr8:11849347  | 4  | n/a         | Others | CTSB     | 18881   | FDFT1    | 46737   |
| chr8:29711287  | 6  | rs143977863 | Others | DUSP4    | -360619 | TMEM66   | 371919  |
| chr8:97813316  | 7  | n/a         | Others | MATN2    | -74660  | LAPTM4B  | 38260   |
| chr8:133065543 | 6  | rs55814750  | Others | WISP1    | -125493 | SLA      | -5186   |
| chr8:142017087 | 5  | n/a         | Others | TSNARE1  | 386094  | PTP4A3   | 696356  |
| chr8:142765584 | 5  | rs13272651  | Others | LYPD2    | -13051  | LYNX1    | 12637   |
| chr8:143310432 | 2b | n/a         | Shores | ZNF696   | 19044   | TOP1MT   | 24463   |
| chr8:144398572 | 4  | rs4317614   | Shores | CPSF1    | 10790   | ADCK5    | 26222   |
| chr9:446276    | 3a | n/a         | Others | KANK1    | -24014  | DOCK8    | 231412  |
| chr9:27921848  | 7  | rs1888916   | Others | C9orf72  | -348399 | LINGO2   | 748436  |
| chr9:34539872  | 7  | rs142048455 | Others | ENHO     | -16832  | CNTFR    | 49864   |
| chr9:100332543 | 6  | n/a         | Others | TEX10    | 20395   | INVS     | 233288  |
| chr9:106530763 | 7  | n/a         | Others | ZNF462   | -332333 | TMEM38B  | 836220  |
| chr9:108616106 | 7  | n/a         | Others | ACTL7B   | 240852  |          |         |
| chr9:113294725 | 7  | rs7849326   | Others | RNF183   | 5039    | PRPF4    | 19084   |
| chr9:119361013 | 5  | rs183792476 | Others | DBC1     | 8453    |          |         |
| chr9:124096410 | 5  | n/a         | Others | NEK6     | -161552 | LHX2     | 84801   |
| chr9:126420976 | 2b | n/a         | Others | LMX1B    | -193466 | MVB12B   | 94128   |
| chr9:132197921 | 5  | rs11243663  | Shores | NTNG2    | 35975   | SETX     | 157063  |
| chr9:133708289 | 5  | rs2073815   | Others | SARDH    | 31630   | DBH      | 71930   |
| chr9:134333485 | 2b | rs3818732   | Others | COL5A1   | -308288 | RXRA     | 6906    |

|                |   |         |        |        |         |        |        |
|----------------|---|---------|--------|--------|---------|--------|--------|
| chr9:134416396 | 5 | n/a     | Others | COL5A1 | -225377 | RXRA   | 89817  |
| chr9:134690733 | 5 | rs16832 | Others | FCN2   | -190078 | COL5A1 | 48960  |
| chr9:136600128 | 5 | n/a     | Others | EGFL7  | -58727  | NOTCH1 | -54267 |
| chr9:137041339 | 4 | n/a     | Shores | FUT7   | -8330   | NPDC1  | 4863   |
| chr9:137265634 | 6 | n/a     | Shores | TOR4A  | -12114  | NELFB  | 10462  |

---

**Table S3. DM-region identified from MethyKit**

| <b>Chromosome coordinate<br/>(GRCh38/Hg38)</b> | <b>p-value</b> | <b>FDR-adjusted p-<br/>value</b> | <b>Delta methylation<br/>(APMB-ARMB)</b> | <b>Size (bp)</b> | <b>nCpG in<br/>Region</b> | <b>In original DMS table</b> | <b>Found with TF binding</b> | <b>Found in<br/>GeneHancer</b> |
|------------------------------------------------|----------------|----------------------------------|------------------------------------------|------------------|---------------------------|------------------------------|------------------------------|--------------------------------|
| chr1:31236642-31236691                         | 2.13E-20       | 2.62E-18                         | -10.39                                   | 49               | 2                         | Yes for one (31236690); t    | No                           | No                             |
| chr2:239935968-239936026                       | 2.41E-35       | 8.20E-33                         | -12.01                                   | 58               | 2                         | Yes for both 2 sites         | CEBPbeta                     | No                             |
| chr10:103361871-103361886                      | 2.51E-20       | 3.06E-18                         | -10.50                                   | 15               | 2                         | Yes for one (103361885);     | CEBPbeta                     | No                             |
| chr11:65969127-65969169                        | 5.69E-57       | 6.03E-54                         | -11.65                                   | 42               | 3                         | Yes for all 3 sites          | No                           | No                             |
| chr17:3641887-3641939                          | 6.06E-23       | 9.02E-21                         | -10.87                                   | 52               | 2                         | Yes for both 2 sites         | CEBPbeta+STAT1               | GH17J003639                    |
| chr22:50035295-50035339                        | 9.50E-44       | 5.08E-41                         | 14.58                                    | 44               | 2                         | Yes for both 2 sites         | No                           | No                             |

Table S4. Result of LOLA analysis on 276 DMS

| userSet | DataSource  | Target (curate) | Tissue (curate) | Cell Type (curate)   | pValueLog  | OddsRatio  | support | rnkPV | rnkOR | rnkSup | maxRnk | meanRnk | b     | c   | d      | Filename                   | Description | qValue | size |
|---------|-------------|-----------------|-----------------|----------------------|------------|------------|---------|-------|-------|--------|--------|---------|-------|-----|--------|----------------------------|-------------|--------|------|
| dms.bed | encode_tfbs | CEBPB           | Liver           | HepG2                | 3.65419973 | 5.19919822 | 8       | 15    | 36    | 71     | 71     | 40.7    | 4276  | 268 | 744656 | wgEncodeAv ChIP HepG2 CE   | 0.044521    | 18125  |      |
| dms.bed | encode_tfbs | CEBPB           | Liver           | HepG2                | 2.65911874 | 3.31127767 | 9       | 20    | 51    | 62     | 62     | 44.3    | 7547  | 267 | 741385 | wgEncodeAv ChIP HepG2 CE   | 0.330146    | 56629  |      |
| dms.bed | encode_tfbs | GR              | Lung            | A549                 | 1.94022713 | 3.2924027  | 6       | 27    | 52    | 89     | 89     | 56      | 5021  | 270 | 743911 | wgEncodeAv ChIP A549 GR    | 1           | 23324  |      |
| dms.bed | encode_tfbs | p300            | Cervix          | HeLa-S3              | 1.44996062 | 4.24887734 | 3       | 37    | 40    | 155    | 155    | 77.3    | 1932  | 273 | 747000 | wgEncodeAv ChIP HeLa-S3 p  | 1           | 25854  |      |
| dms.bed | encode_tfbs | CEBPB           | Liver           | HepG2                | 1.36593115 | 2.22566361 | 7       | 39    | 73    | 80     | 80     | 64      | 8655  | 269 | 740277 | wgEncodeAv ChIP HepG2 CE   | 1           | 18443  |      |
| dms.bed | encode_tfbs | STAT1           | Blood           | K562                 | 1.32593637 | 3.78167461 | 3       | 42    | 44    | 155    | 155    | 80.3    | 2170  | 273 | 746762 | wgEncodeAv ChIP K562 STAT  | 1           | 2203   |      |
| dms.bed | codex       | GATA1           | Blood           | Leukaemia cell       | 0.83026926 | 6.28578886 | 1       | 71    | 33    | 315    | 315    | 140     | 433   | 275 | 748499 | GSM610335_Adult chronic n  | 1           | 7135   |      |
| dms.bed | encode_tfbs | STAT1           | Blood           | K562                 | 0.77643953 | 2.14860649 | 3       | 75    | 75    | 155    | 155    | 102     | 3811  | 273 | 745121 | wgEncodeAv ChIP K562 STAT  | 1           | 2333   |      |
| dms.bed | encode_tfbs | HNF4A           | Liver           | HepG2                | 0.74492513 | 1.6925279  | 5       | 78    | 94    | 102    | 102    | 91.3    | 8076  | 271 | 740856 | wgEncodeAv ChIP HepG2 HN   | 1           | 11130  |      |
| dms.bed | encode_tfbs | p300            | Liver           | HepG2                | 0.69083306 | 1.47922779 | 7       | 81    | 105   | 80     | 105    | 88.7    | 12947 | 269 | 735985 | wgEncodeAv ChIP HepG2 p3   | 1           | 27913  |      |
| dms.bed | encode_tfbs | c-Fos           | Breast          | MCF10A-Er-Src        | 0.60458967 | 1.58936299 | 4       | 84    | 99    | 127    | 127    | 103     | 6866  | 272 | 742066 | wgEncodeAv ChIP MCF10A-E   | 1           | 92358  |      |
| dms.bed | encode_tfbs | FOXA1           | Liver           | HepG2                | 0.56001847 | 1.43343711 | 5       | 89    | 109   | 102    | 109    | 100     | 9517  | 271 | 739415 | wgEncodeAv ChIP HepG2 FO   | 1           | 51264  |      |
| dms.bed | encode_tfbs | FOXA2           | Liver           | HepG2                | 0.54073216 | 1.48290247 | 4       | 95    | 104   | 127    | 127    | 109     | 7354  | 272 | 741578 | wgEncodeAv ChIP HepG2 FO   | 1           | 40989  |      |
| dms.bed | encode_tfbs | HNF4G           | Liver           | HepG2                | 0.53615608 | 1.40049087 | 5       | 96    | 111   | 102    | 111    | 103     | 9738  | 271 | 739194 | wgEncodeAv ChIP HepG2 HN   | 1           | 20384  |      |
| dms.bed | encode_tfbs | GR              | Lung            | A549                 | 0.48446766 | 2.52738366 | 1       | 102   | 66    | 315    | 315    | 161     | 1076  | 275 | 747856 | wgEncodeAv ChIP A549 GR    | 1           | 10279  |      |
| dms.bed | encode_tfbs | GR              | Uterus          | ECC-1                | 0.45857807 | 1.63284478 | 2       | 104   | 97    | 211    | 211    | 137     | 3333  | 274 | 745599 | wgEncodeAv ChIP ECC-1 GR   | 1           | 9255   |      |
| dms.bed | encode_tfbs | FOXA1           | Liver           | HepG2                | 0.41347615 | 1.23124707 | 5       | 107   | 120   | 102    | 120    | 110     | 11057 | 271 | 737875 | wgEncodeAv ChIP HepG2 FO   | 1           | 43114  |      |
| dms.bed | encode_tfbs | c-Jun           | Blood           | K562                 | 0.36527039 | 1.77749413 | 1       | 115   | 89    | 315    | 315    | 173     | 1529  | 275 | 747403 | wgEncodeAv ChIP K562 c-Ju  | 1           | 6596   |      |
| dms.bed | encode_tfbs | CEBPB           | Lung            | A549                 | 0.33635817 | 1.19451921 | 3       | 118   | 123   | 155    | 155    | 132     | 6827  | 273 | 742105 | wgEncodeAv ChIP A549 CEBI  | 1           | 38845  |      |
| dms.bed | codex       | CBX2            | Blood           | Erythrocytic leukaem | 0.3142295  | 1.51099738 | 1       | 120   | 102   | 315    | 315    | 179     | 1798  | 275 | 747134 | GSM830986_K562 erythrocy   | 1           | 8296   |      |
| dms.bed | encode_tfbs | ERalpha_a       | Breast          | T47D                 | 0.30068656 | 1.44493418 | 1       | 121   | 107   | 315    | 315    | 181     | 1880  | 275 | 747052 | wgEncodeAv ChIP T-47D ERa  | 1           | 10505  |      |
| dms.bed | encode_tfbs | ERalpha_a       | Breast          | T47D                 | 0.29782253 | 1.43119781 | 1       | 122   | 110   | 315    | 315    | 182     | 1898  | 275 | 747034 | wgEncodeAv ChIP T-47D ERa  | 1           | 10547  |      |
| dms.bed | encode_tfbs | TFIIIC-110      | Blood           | K562                 | 0.28169358 | 1.35533735 | 1       | 124   | 113   | 315    | 315    | 184     | 2004  | 275 | 746928 | wgEncodeAv ChIP K562 TFIII | 1           | 1858   |      |
| dms.bed | encode_tfbs | TR4             | Blood           | K562                 | 0.24644687 | 1.19767943 | 1       | 127   | 122   | 315    | 315    | 188     | 2267  | 275 | 746665 | wgEncodeAv ChIP K562 TR4   | 1           | 587    |      |
| dms.bed | encode_tfbs | c-Fos           | Breast          | MCF10A-Er-Src        | 0.23974456 | 1.03637045 | 2       | 128   | 129   | 211    | 211    | 156     | 5238  | 274 | 743694 | wgEncodeAv ChIP MCF10A-E   | 1           | 86323  |      |
| dms.bed | encode_tfbs | c-Fos           | Breast          | MCF10A-Er-Src        | 0.22466549 | 0.97334567 | 3       | 130   | 134   | 155    | 155    | 140     | 8361  | 273 | 740571 | wgEncodeAv ChIP MCF10A-E   | 1           | 70462  |      |
| dms.bed | encode_tfbs | GATA-2          | Blood vessel    | HUVEC                | 0.21590388 | 0.97573564 | 2       | 132   | 133   | 211    | 211    | 159     | 5561  | 274 | 743371 | wgEncodeAv ChIP HUVEC GA   | 1           | 27454  |      |
| dms.bed | codex       | LMO2            | Blood           | Leukaemia cell       | 0.19351856 | 0.97953662 | 1       | 134   | 132   | 315    | 315    | 194     | 2770  | 275 | 746162 | GSM108231_Juvenile acute   | 1           | 7923   |      |
| dms.bed | codex       | TP53            | ESC             | Embryonic Stem Cell  | 0.18509572 | 0.94660414 | 1       | 136   | 135   | 315    | 315    | 195     | 2866  | 275 | 746066 | GSM981236_codex Embryor    | 1           | 4067   |      |
| dms.bed | encode_tfbs | p300            | Lung            | A549                 | 0.17804438 | 0.88268734 | 4       | 137   | 137   | 127    | 137    | 134     | 12273 | 272 | 736659 | wgEncodeAv ChIP A549 p300  | 1           | 18216  |      |
| dms.bed | codex       | CEBPB           | Blood           | Macrophage           | 0.17716624 | 0.8769194  | 3       | 138   | 139   | 155    | 155    | 144     | 9269  | 273 | 739663 | GSM785502_Macrophages v    | 1           | 35161  |      |
| dms.bed | codex       | KDM1A           | Blood           | Erythrocytic leukaem | 0.17321136 | 0.86750595 | 2       | 139   | 143   | 211    | 211    | 164     | 6249  | 274 | 742683 | GSM831002_K562 erythrocy   | 1           | 13355  |      |
| dms.bed | encode_tfbs | SETDB1          | Bone            | U2OS                 | 0.17075139 | 0.86125139 | 2       | 140   | 144   | 211    | 211    | 165     | 6294  | 274 | 742638 | wgEncodeAv ChIP U2OS SET   | 1           | 23538  |      |
| dms.bed | encode_tfbs | CEBPB           | Cervix          | HeLa-S3              | 0.17004527 | 0.87978486 | 6       | 141   | 138   | 89     | 141    | 123     | 18451 | 270 | 730481 | wgEncodeAv ChIP HeLa-S3 C  | 1           | 61004  |      |
| dms.bed | encode_tfbs | CEBPB           | Lung            | IMR90                | 0.16764991 | 0.8571569  | 3       | 142   | 145   | 155    | 155    | 147     | 9480  | 273 | 739452 | wgEncodeAv ChIP IMR90 CEI  | 1           | 70445  |      |
| dms.bed | encode_tfbs | c-Fos           | Breast          | MCF10A-Er-Src        | 0.15704074 | 0.8262869  | 2       | 146   | 146   | 211    | 211    | 168     | 6558  | 274 | 742374 | wgEncodeAv ChIP MCF10A-E   | 1           | 67918  |      |
| dms.bed | codex       | RUNX1T1         | Blood           | Acute Myeloid Leuke  | 0.14802977 | 0.80317637 | 2       | 147   | 150   | 211    | 211    | 169     | 6745  | 274 | 742187 | GSM722705_Kasumi-1 (AML    | 1           | 5124   |      |
| dms.bed | encode_tfbs | HNF4A           | Liver           | HepG2                | 0.14728423 | 0.80125837 | 2       | 149   | 151   | 211    | 211    | 170     | 6761  | 274 | 742171 | wgEncodeAv ChIP HepG2 HN   | 1           | 20805  |      |
| dms.bed | encode_tfbs | FOSL2           | Liver           | HepG2                | 0.14307777 | 0.81802562 | 4       | 150   | 147   | 127    | 150    | 141     | 13226 | 272 | 735706 | wgEncodeAv ChIP HepG2 FO   | 1           | 25211  |      |
| dms.bed | encode_tfbs | ERalpha_a       | Uterus          | ECC-1                | 0.12953201 | 0.75524202 | 2       | 152   | 153   | 211    | 211    | 172     | 7169  | 274 | 741763 | wgEncodeAv ChIP ECC-1 ERa  | 1           | 16091  |      |
| dms.bed | codex       | FOS             | Blood           | Leukaemia cell       | 0.12776256 | 0.732415   | 1       | 153   | 156   | 315    | 315    | 208     | 3700  | 275 | 745232 | GSM610336_Adult chronic n  | 1           | 11110  |      |
| dms.bed | encode_tfbs | TAL1            | Blood           | K562                 | 0.12655676 | 0.74745132 | 2       | 154   | 154   | 211    | 211    | 173     | 7243  | 274 | 741689 | wgEncodeAv ChIP K562 TAL1  | 1           | 26260  |      |
| dms.bed | encode_tfbs | NFKB            | Blood           | GM19193              | 0.11713592 | 0.69413206 | 1       | 155   | 160   | 315    | 315    | 210     | 3903  | 275 | 745029 | wgEncodeAv ChIP GM19193    | 1           | 5280   |      |
| dms.bed | codex       | POU5F1          | ESC             | Embryonic Stem Cell  | 0.1124165  | 0.67721119 | 1       | 156   | 164   | 315    | 315    | 212     | 4000  | 275 | 744932 | GSM112406_codex Embryor    | 1           | 10380  |      |
| dms.bed | encode_tfbs | STAT3           | Breast          | MCF10A-Er-Src        | 0.1058634  | 0.69238827 | 2       | 158   | 161   | 211    | 211    | 177     | 7813  | 274 | 741119 | wgEncodeAv ChIP MCF10A-E   | 1           | 39908  |      |
| dms.bed | codex       | FOSB            | Blood           | Leukaemia cell       | 0.0986449  | 0.67271799 | 2       | 160   | 165   | 211    | 211    | 179     | 8039  | 274 | 740893 | GSM610337_Adult chronic n  | 1           | 23883  |      |
| dms.bed | encode_tfbs | STAT3           | Breast          | MCF10A-Er-Src        | 0.09321824 | 0.69183107 | 3       | 161   | 162   | 155    | 162    | 159     | 11710 | 273 | 737222 | wgEncodeAv ChIP MCF10A-E   | 1           | 44494  |      |
| dms.bed | encode_tfbs | STAT3           | Breast          | MCF10A-Er-Src        | 0.09161815 | 0.6029094  | 1       | 163   | 182   | 315    | 315    | 220     | 4490  | 275 | 744442 | wgEncodeAv ChIP MCF10A-E   | 1           | 12334  |      |
| dms.bed | encode_tfbs | STAT3           | Breast          | MCF10A-Er-Src        | 0.08468282 | 0.63372546 | 2       | 165   | 172   | 211    | 211    | 183     | 8528  | 274 | 740404 | wgEncodeAv ChIP MCF10A-E   | 1           | 45110  |      |
| dms.bed | encode_tfbs | c-Jun           | Blood vessel    | HUVEC                | 0.08363336 | 0.57433277 | 1       | 167   | 186   | 315    | 315    | 223     | 4712  | 275 | 744220 | wgEncodeAv ChIP HUVEC c-J  | 1           | 29524  |      |
| dms.bed | encode_tfbs | HDAC2           | Liver           | HepG2                | 0.0808241  | 0.726043   | 6       | 169   | 157   | 89     | 169    | 138     | 22242 | 270 | 726690 | wgEncodeAv ChIP HepG2 HC   | 1           | 18836  |      |
| dms.bed | encode_tfbs | ARID3A          | Liver           | HepG2                | 0.07916625 | 0.61789044 | 2       | 171   | 177   | 211    | 211    | 186     | 8744  | 274 | 740188 | wgEncodeAv ChIP HepG2 AR   | 1           | 17622  |      |
| dms.bed | encode_tfbs | BAF170          | Cervix          | HeLa-S3              | 0.06152097 | 0.49397574 | 1       | 172   | 200   | 315    | 315    | 229     | 5473  | 275 | 743459 | wgEncodeAv ChIP HeLa-S3 B  | 1           | 2632   |      |
| dms.bed | encode_tfbs | CEBPB           | ESC             | H1-hESC              | 0.06095951 | 0.49189336 | 1       | 173   | 201   | 315    | 315    | 230     | 5496  | 275 | 743436 | wgEncodeAv ChIP H1-hESC C  | 1           | 15557  |      |
| dms.bed | encode_tfbs | MBD4            | Liver           | HepG2                | 0.05482704 | 0.4689361  | 1       | 177   | 206   | 315    | 315    | 233     | 5763  | 275 | 743169 | wgEncodeAv ChIP HepG2 MI   | 1           | 5912   |      |

|         |             |           |              |                       |            |            |   |     |     |     |     |     |       |     |        |                             |   |       |
|---------|-------------|-----------|--------------|-----------------------|------------|------------|---|-----|-----|-----|-----|-----|-------|-----|--------|-----------------------------|---|-------|
| dms.bed | codex       | TAL1      | Blood        | Erythroid Progenitor  | 0.05407313 | 0.46608347 | 1 | 178 | 207 | 315 | 315 | 233 | 5798  | 275 | 743134 | GSM651545_CD36+ erythro     | 1 | 17834 |
| dms.bed | encode_tfbs | TEAD4     | Liver        | HepG2                 | 0.0482517  | 0.44378267 | 1 | 179 | 212 | 315 | 315 | 235 | 6087  | 275 | 742845 | wgEncodeAv ChIP HepG2 TE    | 1 | 15160 |
| dms.bed | codex       | TAL1      | Blood        | T-Cell                | 0.04606831 | 0.4352744  | 1 | 180 | 214 | 315 | 315 | 236 | 6205  | 275 | 742727 | GSM151964i codex T-Cell TA  | 1 | 18234 |
| dms.bed | encode_tfbs | ERalpha_a | Uterus       | ECC-1                 | 0.04236907 | 0.42064223 | 1 | 184 | 220 | 315 | 315 | 240 | 6419  | 275 | 742513 | wgEncodeAv ChIP ECC-1 ERa   | 1 | 11452 |
| dms.bed | encode_tfbs | GATA3     | Breast       | T47D                  | 0.0421825  | 0.50075449 | 2 | 185 | 196 | 211 | 211 | 197 | 10760 | 274 | 738172 | wgEncodeAv ChIP T-47D GA    | 1 | 37199 |
| dms.bed | encode_tfbs | NFKB      | Blood        | GM19099               | 0.0417617  | 0.41821072 | 1 | 186 | 222 | 315 | 315 | 241 | 6456  | 275 | 742476 | wgEncodeAv ChIP GM19099     | 1 | 7777  |
| dms.bed | encode_tfbs | SP1       | Liver        | HepG2                 | 0.04174954 | 0.63298366 | 6 | 187 | 173 | 89  | 187 | 150 | 25401 | 270 | 723531 | wgEncodeAv ChIP HepG2 SP    | 1 | 25477 |
| dms.bed | encode_tfbs | USF2      | Liver        | HepG2                 | 0.03929917 | 0.40825822 | 1 | 189 | 227 | 315 | 315 | 244 | 6612  | 275 | 742320 | wgEncodeAv ChIP HepG2 US    | 1 | 6291  |
| dms.bed | encode_tfbs | CTCF      | Skin         | NHEK                  | 0.03656113 | 0.61754394 | 6 | 193 | 178 | 89  | 193 | 153 | 26014 | 270 | 722918 | wgEncodeAv ChIP NHEK CTC    | 1 | 42465 |
| dms.bed | encode_tfbs | TCF7L2    | Kidney       | HEK293                | 0.03622084 | 0.39557939 | 1 | 194 | 230 | 315 | 315 | 246 | 6822  | 275 | 742110 | wgEncodeAv ChIP HEK293 Ti   | 1 | 8961  |
| dms.bed | encode_tfbs | c-Jun     | Blood        | K562                  | 0.03497931 | 0.39038145 | 1 | 195 | 232 | 315 | 315 | 247 | 6912  | 275 | 742020 | wgEncodeAv ChIP K562 c-Ju   | 1 | 9848  |
| dms.bed | encode_tfbs | TCF12     | ESC          | H1-hESC               | 0.03417623 | 0.38699071 | 1 | 196 | 234 | 315 | 315 | 248 | 6972  | 275 | 741960 | wgEncodeAv ChIP H1-hESC T   | 1 | 7833  |
| dms.bed | codex       | EP300     | Blood        | Leukaemia cell        | 0.0335216  | 0.38420935 | 1 | 198 | 235 | 315 | 315 | 249 | 7022  | 275 | 741910 | GSM749524_Acute promyel     | 1 | 8952  |
| dms.bed | encode_tfbs | JunB      | Blood        | K562                  | 0.03085115 | 0.37268747 | 1 | 201 | 239 | 315 | 315 | 252 | 7237  | 275 | 741695 | wgEncodeAv ChIP K562 eGFI   | 1 | 12287 |
| dms.bed | codex       | SUZ12     | Blood        | Erythrocytic leukaem  | 0.02734985 | 0.3570868  | 1 | 205 | 244 | 315 | 315 | 255 | 7550  | 275 | 741382 | GSM831021_K562 erythrocy    | 1 | 2804  |
| dms.bed | encode_tfbs | KAP1      | Bone         | U2OS                  | 0.02601379 | 0.49084193 | 3 | 207 | 202 | 155 | 207 | 188 | 16400 | 273 | 732532 | wgEncodeAv ChIP U2OS KAP    | 1 | 14647 |
| dms.bed | encode_tfbs | c-Myc     | Blood vessel | HUVEC                 | 0.02309621 | 0.33718029 | 1 | 209 | 251 | 315 | 315 | 258 | 7991  | 275 | 740941 | wgEncodeAv ChIP HUVEC c-I   | 1 | 5145  |
| dms.bed | codex       | LMO2      | Blood        | Acute Myeloid Leuke   | 0.02063264 | 0.41228049 | 2 | 212 | 225 | 211 | 225 | 216 | 13028 | 274 | 735904 | GSM150116_Kasumi-1 (AML     | 1 | 11106 |
| dms.bed | encode_tfbs | STAT3     | Breast       | MCF10A-Er-Src         | 0.01754331 | 0.30897563 | 1 | 214 | 258 | 315 | 315 | 262 | 8712  | 275 | 740220 | wgEncodeAv ChIP MCF10A-E    | 1 | 41355 |
| dms.bed | encode_tfbs | CEBPB     | Blood        | K562                  | 0.01706941 | 0.30641335 | 1 | 215 | 259 | 315 | 315 | 263 | 8784  | 275 | 740148 | wgEncodeAv ChIP K562 CEBI   | 1 | 22240 |
| dms.bed | codex       | BACH2     | Blood        | Lymphoma cell         | 0.01468022 | 0.29300693 | 1 | 218 | 266 | 315 | 315 | 266 | 9181  | 275 | 739751 | GSM108480i Adult B cell No  | 1 | 10250 |
| dms.bed | encode_tfbs | SMC3      | Liver        | HepG2                 | 0.0141929  | 0.29015902 | 1 | 219 | 268 | 315 | 315 | 267 | 9270  | 275 | 739662 | wgEncodeAv ChIP HepG2 SM    | 1 | 30797 |
| dms.bed | codex       | ZNF143    | Cervix       | Cervical cancer cells | 0.0140839  | 0.37697326 | 2 | 220 | 236 | 211 | 236 | 222 | 14225 | 274 | 734707 | GSM959045_ChIP-seq_ZNF1     | 1 | 4407  |
| dms.bed | encode_tfbs | USF-1     | Liver        | HepG2                 | 0.01350906 | 0.37349319 | 2 | 221 | 238 | 211 | 238 | 223 | 14355 | 274 | 734577 | wgEncodeAv ChIP HepG2 US    | 1 | 21890 |
| dms.bed | encode_tfbs | CTCF      | ESC          | H1-hESC               | 0.01346866 | 0.49969372 | 5 | 222 | 197 | 102 | 222 | 174 | 26668 | 271 | 722264 | wgEncodeAv ChIP H1-hESC C   | 1 | 66551 |
| dms.bed | encode_tfbs | JunD      | Liver        | HepG2                 | 0.01334631 | 0.42792242 | 3 | 223 | 217 | 155 | 223 | 198 | 18751 | 273 | 730181 | wgEncodeAv ChIP HepG2 Jun   | 1 | 21614 |
| dms.bed | codex       | FOXA2     | Endoderm     | Endoderm              | 0.01285127 | 0.28208403 | 1 | 224 | 274 | 315 | 315 | 271 | 9532  | 275 | 739400 | GSM112406_Day 5 of in vitri | 1 | 34457 |
| dms.bed | encode_tfbs | GR        | Lung         | A549                  | 0.01274505 | 0.4954159  | 5 | 226 | 198 | 102 | 226 | 175 | 26890 | 271 | 722042 | wgEncodeAv ChIP A549 GR     | 1 | 16720 |
| dms.bed | encode_tfbs | CTCF      | ESC          | H1-hESC               | 0.01215883 | 0.42048988 | 3 | 227 | 221 | 155 | 227 | 201 | 19074 | 273 | 729858 | wgEncodeAv ChIP H1-hESC C   | 1 | 43247 |
| dms.bed | encode_tfbs | ZKSCAN1   | Cervix       | HeLa-S3               | 0.01195469 | 0.27647156 | 1 | 229 | 276 | 315 | 315 | 273 | 9723  | 275 | 739209 | wgEncodeAv ChIP HeLa-S3 Z   | 1 | 4131  |
| dms.bed | encode_tfbs | RXRA      | Liver        | HepG2                 | 0.01170843 | 0.27489607 | 1 | 230 | 277 | 315 | 315 | 274 | 9778  | 275 | 739154 | wgEncodeAv ChIP HepG2 RX    | 1 | 17063 |
| dms.bed | encode_tfbs | TEAD4     | Blood        | K562                  | 0.011629   | 0.4170341  | 3 | 231 | 223 | 155 | 231 | 203 | 19228 | 273 | 729704 | wgEncodeAv ChIP K562 TEAI   | 1 | 31030 |
| dms.bed | encode_tfbs | CTCF      | Lung         | A549                  | 0.01137165 | 0.45558379 | 4 | 232 | 210 | 127 | 232 | 190 | 23419 | 272 | 725513 | wgEncodeAv ChIP A549 CTCI   | 1 | 45732 |
| dms.bed | encode_tfbs | CTCF      | Esophagus    | HEEpiC                | 0.01111572 | 0.45388303 | 4 | 233 | 211 | 127 | 233 | 190 | 23504 | 272 | 725428 | wgEncodeAv ChIP HEEpiC CT   | 1 | 46226 |
| dms.bed | encode_tfbs | Rad21     | ESC          | H1-hESC               | 0.01058259 | 0.40991972 | 3 | 235 | 226 | 155 | 235 | 205 | 19553 | 273 | 729379 | wgEncodeAv ChIP H1-hESC F   | 1 | 55674 |
| dms.bed | encode_tfbs | c-Fos     | Blood        | K562                  | 0.01045256 | 0.26660517 | 1 | 236 | 280 | 315 | 315 | 277 | 10078 | 275 | 738854 | wgEncodeAv ChIP K562 c-Fo   | 1 | 7646  |
| dms.bed | encode_tfbs | Rad21     | Liver        | HepG2                 | 0.01017117 | 0.35145044 | 2 | 237 | 245 | 211 | 245 | 231 | 15237 | 274 | 733695 | wgEncodeAv ChIP HepG2 Ra    | 1 | 37233 |
| dms.bed | encode_tfbs | CEBPB     | Blood        | K562                  | 0.01015658 | 0.26458258 | 1 | 238 | 281 | 315 | 315 | 278 | 10154 | 275 | 738778 | wgEncodeAv ChIP K562 CEBI   | 1 | 38715 |
| dms.bed | encode_tfbs | COREST    | Liver        | HepG2                 | 0.00996956 | 0.34999656 | 2 | 239 | 248 | 211 | 248 | 233 | 15299 | 274 | 733633 | wgEncodeAv ChIP HepG2 CC    | 1 | 5336  |
| dms.bed | encode_tfbs | CTCF      | Liver        | HepG2                 | 0.00994015 | 0.2630854  | 1 | 240 | 282 | 315 | 315 | 279 | 10211 | 275 | 738721 | wgEncodeAv ChIP HepG2 CT    | 1 | 40800 |
| dms.bed | encode_tfbs | CTCF      | Liver        | HepG2                 | 0.00958205 | 0.40270499 | 3 | 241 | 228 | 155 | 241 | 208 | 19894 | 273 | 729038 | wgEncodeAv ChIP HepG2 CT    | 1 | 55778 |
| dms.bed | encode_tfbs | USF2      | Cervix       | HeLa-S3               | 0.00914404 | 0.25743523 | 1 | 244 | 285 | 315 | 315 | 281 | 10432 | 275 | 738500 | wgEncodeAv ChIP HeLa-S3 U   | 1 | 12306 |
| dms.bed | encode_tfbs | SETDB1    | Blood        | K562                  | 0.0086569  | 0.25385639 | 1 | 246 | 291 | 315 | 315 | 284 | 10577 | 275 | 738355 | wgEncodeAv ChIP K562 SETI   | 1 | 3882  |
| dms.bed | encode_tfbs | CTCF      | Breast       | MCF-7                 | 0.0081164  | 0.39124102 | 3 | 247 | 231 | 155 | 247 | 211 | 20461 | 273 | 728471 | wgEncodeAv ChIP MCF-7 CTi   | 1 | 58994 |
| dms.bed | encode_tfbs | CTCF      | Kidney       | RPTEC                 | 0.00741139 | 0.45752182 | 5 | 249 | 209 | 102 | 249 | 187 | 29031 | 271 | 719901 | wgEncodeAv ChIP RPTEC CTi   | 1 | 58785 |
| dms.bed | codex       | ZNF143    | Blood        | Chronic myelogenou:   | 0.00709337 | 0.24161424 | 1 | 250 | 295 | 315 | 315 | 287 | 11105 | 275 | 737827 | GSM959047_ChIP-seq_ZNF1     | 1 | 3419  |
| dms.bed | encode_tfbs | CTCF      | Blood        | K562                  | 0.00696301 | 0.50116805 | 7 | 251 | 195 | 80  | 251 | 175 | 36967 | 269 | 711965 | wgEncodeAv ChIP K562 CTCI   | 1 | 51992 |
| dms.bed | encode_tfbs | p300      | Blood        | K562                  | 0.00610667 | 0.31791835 | 2 | 252 | 254 | 211 | 254 | 239 | 16808 | 274 | 732124 | wgEncodeAv ChIP K562 p30i   | 1 | 25881 |
| dms.bed | encode_tfbs | ZEB1      | Blood        | GM12878               | 0.00480988 | 0.22078039 | 1 | 253 | 308 | 315 | 315 | 292 | 12136 | 275 | 736796 | wgEncodeAv ChIP GM12878     | 1 | 4845  |
| dms.bed | encode_tfbs | CTCF      | Blood        | K562                  | 0.00469414 | 0.30308923 | 2 | 255 | 264 | 211 | 264 | 243 | 17611 | 274 | 731321 | wgEncodeAv ChIP K562 CTCI   | 1 | 56058 |
| dms.bed | encode_tfbs | Rad21     | Blood        | GM12878               | 0.00456802 | 0.21827544 | 1 | 256 | 309 | 315 | 315 | 293 | 12273 | 275 | 736659 | wgEncodeAv ChIP GM12878     | 1 | 40019 |
| dms.bed | encode_tfbs | NFKB      | Blood        | GM12878               | 0.00424622 | 0.21482246 | 1 | 258 | 311 | 315 | 315 | 295 | 12467 | 275 | 736465 | wgEncodeAv ChIP GM12878     | 1 | 17036 |
| dms.bed | encode_tfbs | CTCF      | Breast       | MCF-7                 | 0.00413298 | 0.42348361 | 5 | 259 | 218 | 102 | 259 | 193 | 31267 | 271 | 717665 | wgEncodeAv ChIP MCF-7 CTi   | 1 | 82176 |
| dms.bed | encode_tfbs | ELF1      | Liver        | HepG2                 | 0.00394436 | 0.42100992 | 5 | 260 | 219 | 102 | 260 | 194 | 31443 | 271 | 717489 | wgEncodeAv ChIP HepG2 EL    | 1 | 18001 |
| dms.bed | encode_tfbs | TCF7L2    | Cervix       | HeLa-S3               | 0.0038731  | 0.38813665 | 4 | 261 | 233 | 127 | 261 | 207 | 27340 | 272 | 721592 | wgEncodeAv ChIP HeLa-S3 T   | 1 | 19242 |
| dms.bed | encode_tfbs | Max       | Blood vessel | HUVEC                 | 0.00363033 | 0.2899247  | 2 | 263 | 269 | 211 | 269 | 248 | 18391 | 274 | 730541 | wgEncodeAv ChIP HUVEC M.    | 1 | 9122  |
| dms.bed | encode_tfbs | EBF1      | Blood        | GM12878               | 0.00326371 | 0.20322491 | 1 | 265 | 317 | 315 | 317 | 299 | 13166 | 275 | 735766 | wgEncodeAv ChIP GM12878     | 1 | 33410 |

|         |             |           |                |                     |            |            |   |     |     |     |     |     |       |     |        |            |                |           |   |       |
|---------|-------------|-----------|----------------|---------------------|------------|------------|---|-----|-----|-----|-----|-----|-------|-----|--------|------------|----------------|-----------|---|-------|
| dms.bed | encode_tfbs | c-Myc     | Breast         | MCF10A-Er-Src       | 0.00313485 | 0.20155741 | 1 | 266 | 319 | 315 | 319 | 300 | 13273 | 275 | 735659 | wgEncodeAv | ChIP           | MCF10A-E  | 1 | 25703 |
| dms.bed | encode_tfbs | c-Fos     | Blood vessel   | HUVEC               | 0.00295605 | 0.1991739  | 1 | 267 | 322 | 315 | 322 | 301 | 13429 | 275 | 735503 | wgEncodeAv | ChIP           | HUVEC c-f | 1 | 46726 |
| dms.bed | codex       | MYB       | Blood          | T-Cell              | 0.00293167 | 0.19884221 | 1 | 268 | 323 | 315 | 323 | 302 | 13451 | 275 | 735481 | GSM144200! | codex          | T-Cell M  | 1 | 17978 |
| dms.bed | encode_tfbs | BHLHE40   | Liver          | HepG2               | 0.00273383 | 0.33059102 | 3 | 269 | 253 | 155 | 269 | 226 | 24094 | 273 | 724838 | wgEncodeAv | ChIP           | HepG2 BH  | 1 | 14628 |
| dms.bed | encode_tfbs | NFKB      | Blood          | GM10847             | 0.00260874 | 0.19428119 | 1 | 271 | 327 | 315 | 327 | 304 | 13761 | 275 | 735171 | wgEncodeAv | ChIP           | GM10847   | 1 | 9262  |
| dms.bed | codex       | GATA1     | Blood          | Erythroblast        | 0.00212678 | 0.35935047 | 4 | 273 | 243 | 127 | 273 | 214 | 29444 | 272 | 719488 | GSM127824! | Proerythroblas |           | 1 | 53723 |
| dms.bed | encode_tfbs | CTCF      | Cervix         | HeLa-S3             | 0.0019661  | 0.31600171 | 3 | 275 | 255 | 155 | 275 | 228 | 25169 | 273 | 723763 | wgEncodeAv | ChIP           | HeLa-S3 C | 1 | 52783 |
| dms.bed | encode_tfbs | SMC3      | Blood          | K562                | 0.00194776 | 0.18371686 | 1 | 276 | 339 | 315 | 339 | 310 | 14537 | 275 | 734395 | wgEncodeAv | ChIP           | K562 SMC  | 1 | 23598 |
| dms.bed | codex       | GATA1     | Blood          | Erythroblast        | 0.00193827 | 0.41333157 | 6 | 277 | 224 | 89  | 277 | 197 | 38211 | 270 | 710721 | GSM970258! | Proerythroblas |           | 1 | 71670 |
| dms.bed | encode_tfbs | CTCF      | Blood          | K562                | 0.00178671 | 0.31202325 | 3 | 278 | 257 | 155 | 278 | 230 | 25479 | 273 | 723453 | wgEncodeAv | ChIP           | K562 CTCI | 1 | 45603 |
| dms.bed | encode_tfbs | Rad21     | Blood          | K562                | 0.00177808 | 0.18064925 | 1 | 279 | 341 | 315 | 341 | 312 | 14779 | 275 | 734153 | wgEncodeAv | ChIP           | K562 Rad: | 1 | 34725 |
| dms.bed | encode_tfbs | CTCF      | Choroid plexus | HCPEpiC             | 0.0017233  | 0.35033721 | 4 | 280 | 247 | 127 | 280 | 218 | 30171 | 272 | 718761 | wgEncodeAv | ChIP           | HCPEpiC C | 1 | 61062 |
| dms.bed | encode_tfbs | CTCF      | Liver          | HepG2               | 0.00167491 | 0.25659125 | 2 | 281 | 286 | 211 | 286 | 259 | 20714 | 274 | 728218 | wgEncodeAv | ChIP           | HepG2 CT  | 1 | 46448 |
| dms.bed | encode_tfbs | CTCF      | ESC            | H1-hESC             | 0.00157193 | 0.25420515 | 2 | 283 | 290 | 211 | 290 | 261 | 20903 | 274 | 728029 | wgEncodeAv | ChIP           | H1-hESC C | 1 | 54111 |
| dms.bed | encode_tfbs | CTCF      | Blood          | GM12865             | 0.0015442  | 0.30616049 | 3 | 284 | 260 | 155 | 284 | 233 | 25950 | 273 | 722982 | wgEncodeAv | ChIP           | GM12865   | 1 | 44069 |
| dms.bed | encode_tfbs | SIX5      | Lung           | A549                | 0.00146343 | 0.1744209  | 1 | 285 | 346 | 315 | 346 | 315 | 15296 | 275 | 733636 | wgEncodeAv | ChIP           | A549 SIX5 | 1 | 4909  |
| dms.bed | encode_tfbs | TCF12     | Lung           | A549                | 0.0014548  | 0.30383118 | 3 | 286 | 263 | 155 | 286 | 235 | 26142 | 273 | 722790 | wgEncodeAv | ChIP           | A549 TCF: | 1 | 20896 |
| dms.bed | encode_tfbs | YY1       | Blood          | K562                | 0.00127441 | 0.17024915 | 1 | 287 | 348 | 315 | 348 | 317 | 15663 | 275 | 733269 | wgEncodeAv | ChIP           | K562 YY1  | 1 | 4948  |
| dms.bed | encode_tfbs | CTCF      | Breast         | MCF-7               | 0.00127284 | 0.24658935 | 2 | 288 | 292 | 211 | 292 | 264 | 21530 | 274 | 727402 | wgEncodeAv | ChIP           | MCF-7 CTI | 1 | 66592 |
| dms.bed | encode_tfbs | CTCF      | Intestine      | Caco-2              | 0.00115532 | 0.24324938 | 2 | 289 | 294 | 211 | 294 | 265 | 21817 | 274 | 727115 | wgEncodeAv | ChIP           | Caco-2 CT | 1 | 46852 |
| dms.bed | encode_tfbs | USF-1     | Blood          | K562                | 0.00112408 | 0.16662953 | 1 | 290 | 350 | 315 | 350 | 318 | 15996 | 275 | 732936 | wgEncodeAv | ChIP           | K562 USF- | 1 | 18521 |
| dms.bed | encode_tfbs | CTCF      | Lung           | SAEC                | 0.00111905 | 0.29401894 | 3 | 291 | 265 | 155 | 291 | 237 | 26983 | 273 | 721949 | wgEncodeAv | ChIP           | SAEC CTCI | 1 | 42446 |
| dms.bed | encode_tfbs | NFKB      | Blood          | GM12892             | 0.00100918 | 0.16363897 | 1 | 292 | 351 | 315 | 351 | 319 | 16282 | 275 | 732650 | wgEncodeAv | ChIP           | GM12892   | 1 | 8152  |
| dms.bed | encode_tfbs | CTCF      | Eye            | WERI-Rb-1           | 0.00100231 | 0.23851701 | 2 | 293 | 297 | 211 | 297 | 267 | 22237 | 274 | 726695 | wgEncodeAv | ChIP           | WERI-Rb-: | 1 | 50308 |
| dms.bed | codex       | CBFB      | Blood          | Leukaemia cell      | 0.00091699 | 0.16106976 | 1 | 295 | 352 | 315 | 352 | 321 | 16536 | 275 | 732396 | GSM112232! | U937 (histiocy |           | 1 | 9623  |
| dms.bed | encode_tfbs | CTCF      | Blood          | K562                | 0.00081965 | 0.23213183 | 2 | 296 | 299 | 211 | 299 | 269 | 22830 | 274 | 726102 | wgEncodeAv | ChIP           | K562 CTCI | 1 | 43247 |
| dms.bed | encode_tfbs | CTCF      | Breast         | HMF                 | 0.00081603 | 0.23199556 | 2 | 297 | 300 | 211 | 300 | 269 | 22843 | 274 | 726089 | wgEncodeAv | ChIP           | HMF CTCF  | 1 | 54171 |
| dms.bed | encode_tfbs | USF1      | Brain          | SK-N-SH_RA          | 0.00070543 | 0.22759431 | 2 | 299 | 304 | 211 | 304 | 271 | 23271 | 274 | 725661 | wgEncodeAv | ChIP           | SK-N-SH_f | 1 | 19622 |
| dms.bed | encode_tfbs | USF-1     | ESC            | H1-hESC             | 0.00070149 | 0.15428952 | 1 | 300 | 358 | 315 | 358 | 324 | 17246 | 275 | 731686 | wgEncodeAv | ChIP           | H1-hESC L | 1 | 26042 |
| dms.bed | encode_tfbs | NFKB      | Blood          | GM18951             | 0.00062923 | 0.15169577 | 1 | 302 | 360 | 315 | 360 | 326 | 17534 | 275 | 731398 | wgEncodeAv | ChIP           | GM18951   | 1 | 13535 |
| dms.bed | encode_tfbs | CTCF      | Breast         | HMEC                | 0.00050774 | 0.14682221 | 1 | 303 | 368 | 315 | 368 | 329 | 18102 | 275 | 730830 | wgEncodeAv | ChIP           | HMEC CTC  | 1 | 40048 |
| dms.bed | encode_tfbs | CTCF      | Skin           | NHEK                | 0.00047453 | 0.21644104 | 2 | 304 | 310 | 211 | 310 | 275 | 24431 | 274 | 724501 | wgEncodeAv | ChIP           | NHEK CTC  | 1 | 47113 |
| dms.bed | encode_tfbs | CTCF      | Blood          | K562                | 0.00044413 | 0.21468733 | 2 | 305 | 312 | 211 | 312 | 276 | 24624 | 274 | 724308 | wgEncodeAv | ChIP           | K562 CTCI | 1 | 54387 |
| dms.bed | encode_tfbs | ATF3      | Blood          | K562                | 0.00043966 | 0.143721   | 1 | 306 | 369 | 315 | 369 | 330 | 18483 | 275 | 730449 | wgEncodeAv | ChIP           | K562 ATF: | 1 | 16011 |
| dms.bed | encode_tfbs | c-Myc     | Breast         | MCF-7               | 0.00039835 | 0.14166932 | 1 | 307 | 370 | 315 | 370 | 331 | 18744 | 275 | 730188 | wgEncodeAv | ChIP           | MCF-7 c-N | 1 | 10072 |
| dms.bed | encode_tfbs | CTCF      | Breast         | MCF-7               | 0.00038201 | 0.26000309 | 3 | 308 | 284 | 155 | 308 | 249 | 30370 | 273 | 718562 | wgEncodeAv | ChIP           | MCF-7 CTI | 1 | 54343 |
| dms.bed | encode_tfbs | CTCF      | Blood          | GM12878             | 0.00035724 | 0.13947069 | 1 | 309 | 372 | 315 | 372 | 332 | 19032 | 275 | 729900 | wgEncodeAv | ChIP           | GM12878   | 1 | 48916 |
| dms.bed | codex       | LMO2      | Blood          | Acute Myeloid Leuke | 0.00035691 | 0.20909792 | 2 | 310 | 316 | 211 | 316 | 279 | 25260 | 274 | 723672 | GSM150116! | Kasumi-1 (AML  |           | 1 | 13782 |
| dms.bed | encode_tfbs | NFIC      | Liver          | HepG2               | 0.00032859 | 0.13782816 | 1 | 311 | 373 | 315 | 373 | 333 | 19253 | 275 | 729679 | wgEncodeAv | ChIP           | HepG2 NF  | 1 | 16091 |
| dms.bed | encode_tfbs | AP-2alpha | Cervix         | HeLa-S3             | 0.00031235 | 0.29215125 | 4 | 312 | 267 | 127 | 312 | 235 | 35892 | 272 | 713040 | wgEncodeAv | ChIP           | HeLa-S3 A | 1 | 18970 |
| dms.bed | encode_tfbs | CTCF      | Heart          | HCFaa               | 0.00030476 | 0.13638107 | 1 | 313 | 374 | 315 | 374 | 334 | 19452 | 275 | 729480 | wgEncodeAv | ChIP           | HCFaa CTI | 1 | 41571 |
| dms.bed | encode_tfbs | ETS1      | Lung           | A549                | 0.00029234 | 0.1355938  | 1 | 314 | 375 | 315 | 375 | 335 | 19562 | 275 | 729370 | wgEncodeAv | ChIP           | A549 ETS1 | 1 | 5525  |
| dms.bed | encode_tfbs | Rad21     | Liver          | HepG2               | 0.00025918 | 0.13336689 | 1 | 315 | 376 | 315 | 376 | 335 | 19880 | 275 | 729052 | wgEncodeAv | ChIP           | HepG2 Ra  | 1 | 54315 |
| dms.bed | encode_tfbs | CTCF      | Breast         | MCF-7               | 0.00022206 | 0.28294603 | 4 | 316 | 273 | 127 | 316 | 239 | 37002 | 272 | 711930 | wgEncodeAv | ChIP           | MCF-7 CTI | 1 | 58608 |
| dms.bed | encode_tfbs | CTCF      | Liver          | HepG2               | 0.00018983 | 0.12792753 | 1 | 317 | 379 | 315 | 379 | 337 | 20702 | 275 | 728230 | wgEncodeAv | ChIP           | HepG2 CT  | 1 | 48708 |
| dms.bed | encode_tfbs | CTCF      | Skin           | NHEK                | 0.00018039 | 0.19342699 | 2 | 319 | 328 | 211 | 328 | 286 | 27232 | 274 | 721700 | wgEncodeAv | ChIP           | NHEK CTC  | 1 | 53797 |
| dms.bed | encode_tfbs | CTCF      | Blood          | GM19240             | 0.00016571 | 0.19164438 | 2 | 321 | 331 | 211 | 331 | 288 | 27476 | 274 | 721456 | wgEncodeAv | ChIP           | GM19240   | 1 | 46036 |
| dms.bed | encode_tfbs | JunD      | Blood          | K562                | 0.00016455 | 0.12557473 | 1 | 322 | 380 | 315 | 380 | 339 | 21079 | 275 | 727853 | wgEncodeAv | ChIP           | K562 eGFI | 1 | 26674 |
| dms.bed | encode_tfbs | JunD      | Blood          | K562                | 0.0001595  | 0.23793063 | 3 | 323 | 298 | 155 | 323 | 259 | 33063 | 273 | 715869 | wgEncodeAv | ChIP           | K562 JunE | 1 | 40052 |
| dms.bed | codex       | MYH11     | Blood          | Leukaemia cell      | 0.00015089 | 0.18971546 | 2 | 325 | 333 | 211 | 333 | 290 | 27745 | 274 | 721187 | GSM112232! | U937 (histiocy |           | 1 | 29434 |
| dms.bed | encode_tfbs | Rad21     | ESC            | H1-hESC             | 0.00014127 | 0.18838241 | 2 | 326 | 334 | 211 | 334 | 290 | 27934 | 274 | 720998 | wgEncodeAv | ChIP           | H1-hESC F | 1 | 75680 |
| dms.bed | encode_tfbs | CTCF      | Kidney         | HEK293              | 0.0001369  | 0.12266892 | 1 | 327 | 382 | 315 | 382 | 341 | 21564 | 275 | 727368 | wgEncodeAv | ChIP           | HEK293 C  | 1 | 47331 |
| dms.bed | encode_tfbs | CTCF      | Breast         | MCF-7               | 0.00011711 | 0.18469145 | 2 | 329 | 337 | 211 | 337 | 292 | 28471 | 274 | 720461 | wgEncodeAv | ChIP           | MCF-7 CTI | 1 | 57936 |
| dms.bed | encode_tfbs | MYBL2     | Liver          | HepG2               | 0.00011651 | 0.2309284  | 3 | 330 | 301 | 155 | 330 | 262 | 34020 | 273 | 714912 | wgEncodeAv | ChIP           | HepG2 M'  | 1 | 17898 |
| dms.bed | encode_tfbs | CTCF      | Blood          | GM12873             | 0.00011549 | 0.18442208 | 2 | 331 | 338 | 211 | 338 | 293 | 28511 | 274 | 720421 | wgEncodeAv | ChIP           | GM12873   | 1 | 51005 |
| dms.bed | encode_tfbs | CTCF      | Bone           | Osteobl             | 0.00011472 | 0.23059464 | 3 | 332 | 303 | 155 | 332 | 263 | 34067 | 273 | 714865 | wgEncodeAv | ChIP           | Osteobl C | 1 | 56264 |
| dms.bed | encode_tfbs | STAT1     | Cervix         | HeLa-S3             | 9.4795E-05 | 0.11724327 | 1 | 333 | 389 | 315 | 389 | 346 | 22532 | 275 | 726400 | wgEncodeAv | ChIP           | HeLa-S3 S | 1 | 16158 |

|         |             |           |              |                      |            |            |   |     |     |     |     |     |       |     |        |            |                 |   |       |
|---------|-------------|-----------|--------------|----------------------|------------|------------|---|-----|-----|-----|-----|-----|-------|-----|--------|------------|-----------------|---|-------|
| dms.bed | encode_tfbs | Egr-1     | ESC          | H1-hESC              | 9.44E-05   | 0.11718429 | 1 | 334 | 390 | 315 | 390 | 346 | 22543 | 275 | 726389 | wgEncodeAv | ChIP H1-hESC E  | 1 | 8743  |
| dms.bed | encode_tfbs | CBX3      | Blood        | K562                 | 9.39E-05   | 0.18052847 | 2 | 335 | 342 | 211 | 342 | 296 | 29102 | 274 | 719830 | wgEncodeAv | ChIP K562 CBX:  | 1 | 20723 |
| dms.bed | encode_tfbs | CTCF      | Blood        | GM12878              | 8.8682E-05 | 0.17948226 | 2 | 336 | 343 | 211 | 343 | 297 | 29265 | 274 | 719667 | wgEncodeAv | ChIP GM12878    | 1 | 44982 |
| dms.bed | encode_tfbs | CTCF      | Breast       | HMEC                 | 7.6927E-05 | 0.17693256 | 2 | 337 | 345 | 211 | 345 | 298 | 29670 | 274 | 719262 | wgEncodeAv | ChIP HMEC CTC   | 1 | 55897 |
| dms.bed | encode_tfbs | TCF12     | Blood        | GM12878              | 7.6244E-05 | 0.1142458  | 1 | 338 | 392 | 315 | 392 | 348 | 23105 | 275 | 725827 | wgEncodeAv | ChIP GM12878    | 1 | 20437 |
| dms.bed | encode_tfbs | CEBPD     | Liver        | HepG2                | 7.3623E-05 | 0.11377833 | 1 | 339 | 393 | 315 | 393 | 349 | 23197 | 275 | 725735 | wgEncodeAv | ChIP HepG2 CE   | 1 | 11433 |
| dms.bed | encode_tfbs | AP-2gamma | Cervix       | HeLa-S3              | 7.2919E-05 | 0.28607085 | 5 | 340 | 271 | 102 | 340 | 238 | 45376 | 271 | 703556 | wgEncodeAv | ChIP HeLa-S3 A  | 1 | 25452 |
| dms.bed | encode_tfbs | CTCF      | Blood        | GM19239              | 5.9136E-05 | 0.11093379 | 1 | 341 | 395 | 315 | 395 | 350 | 23773 | 275 | 725159 | wgEncodeAv | ChIP GM19239    | 1 | 41085 |
| dms.bed | encode_tfbs | CTCF      | Blood        | GM12892              | 5.5231E-05 | 0.17126892 | 2 | 343 | 347 | 211 | 347 | 300 | 30611 | 274 | 718321 | wgEncodeAv | ChIP GM12892    | 1 | 48306 |
| dms.bed | encode_tfbs | CTCF      | Skin         | AG09309              | 4.6472E-05 | 0.10796262 | 1 | 344 | 399 | 315 | 399 | 353 | 24406 | 275 | 724526 | wgEncodeAv | ChIP AG09309    | 1 | 43928 |
| dms.bed | encode_tfbs | ELF1      | Lung         | A549                 | 4.537E-05  | 0.10767532 | 1 | 345 | 400 | 315 | 400 | 353 | 24469 | 275 | 724463 | wgEncodeAv | ChIP A549 ELF1  | 1 | 8611  |
| dms.bed | encode_tfbs | CTCF      | Kidney       | HRPEpiC              | 4.004E-05  | 0.10620313 | 1 | 346 | 402 | 315 | 402 | 354 | 24797 | 275 | 724135 | wgEncodeAv | ChIP HRPEpiC C  | 1 | 53134 |
| dms.bed | encode_tfbs | CTCF      | Blood        | GM06990              | 3.9554E-05 | 0.10606158 | 1 | 347 | 403 | 315 | 403 | 355 | 24829 | 275 | 724103 | wgEncodeAv | ChIP GM06990    | 1 | 45500 |
| dms.bed | encode_tfbs | FOXP2     | Brain        | SK-N-MC              | 3.6165E-05 | 0.10503318 | 1 | 350 | 404 | 315 | 404 | 356 | 25064 | 275 | 723868 | wgEncodeAv | ChIP SK-N-MC I  | 1 | 14695 |
| dms.bed | encode_tfbs | CTCF      | Skin         | AG04449              | 3.555E-05  | 0.10483845 | 1 | 351 | 405 | 315 | 405 | 357 | 25109 | 275 | 723823 | wgEncodeAv | ChIP AG04449    | 1 | 50260 |
| dms.bed | encode_tfbs | CTCF      | Lung         | IMR90                | 3.2466E-05 | 0.10382003 | 1 | 352 | 406 | 315 | 406 | 358 | 25347 | 275 | 723585 | wgEncodeAv | ChIP IMR90 CTI  | 1 | 45920 |
| dms.bed | encode_tfbs | ELK4      | Cervix       | HeLa-S3              | 3.1635E-05 | 0.10353255 | 1 | 353 | 407 | 315 | 407 | 358 | 25415 | 275 | 723517 | wgEncodeAv | ChIP HeLa-S3 E  | 1 | 5916  |
| dms.bed | encode_tfbs | CTCF      | Blood        | GM12872              | 3.0393E-05 | 0.10309167 | 1 | 354 | 408 | 315 | 408 | 359 | 25520 | 275 | 723412 | wgEncodeAv | ChIP GM12872    | 1 | 47151 |
| dms.bed | encode_tfbs | CTCF      | Blood        | GM12864              | 2.7303E-05 | 0.10192943 | 1 | 355 | 410 | 315 | 410 | 360 | 25801 | 275 | 723131 | wgEncodeAv | ChIP GM12864    | 1 | 46798 |
| dms.bed | encode_tfbs | Mxi1      | Cervix       | HeLa-S3              | 2.636E-05  | 0.20289468 | 3 | 357 | 318 | 155 | 357 | 277 | 38479 | 273 | 710453 | wgEncodeAv | ChIP HeLa-S3 N  | 1 | 12009 |
| dms.bed | encode_tfbs | CTCF      | Lung         | NHLF                 | 2.0124E-05 | 0.09875889 | 1 | 359 | 411 | 315 | 411 | 362 | 26600 | 275 | 722332 | wgEncodeAv | ChIP NHLF CTCI  | 1 | 39537 |
| dms.bed | encode_tfbs | E2F6      | Cervix       | HeLa-S3              | 1.923E-05  | 0.0983029  | 1 | 360 | 412 | 315 | 412 | 362 | 26719 | 275 | 722213 | wgEncodeAv | ChIP HeLa-S3 E  | 1 | 4775  |
| dms.bed | encode_tfbs | TCF7L2    | Pancreas     | PANC-1               | 1.7571E-05 | 0.09741051 | 1 | 363 | 415 | 315 | 415 | 364 | 26955 | 275 | 721977 | wgEncodeAv | ChIP PANC-1 T(  | 1 | 13366 |
| dms.bed | encode_tfbs | c-Myc     | Breast       | MCF10A-Er-Src        | 1.3539E-05 | 0.15083646 | 2 | 365 | 361 | 211 | 365 | 312 | 34566 | 274 | 714366 | wgEncodeAv | ChIP MCF10A-E   | 1 | 35153 |
| dms.bed | encode_tfbs | BHLHE40   | Blood        | K562                 | 1.3394E-05 | 0.15069932 | 2 | 366 | 362 | 211 | 366 | 313 | 34596 | 274 | 714336 | wgEncodeAv | ChIP K562 BHLI  | 1 | 22497 |
| dms.bed | encode_tfbs | COREST    | Blood        | K562                 | 1.3009E-05 | 0.09454787 | 1 | 367 | 418 | 315 | 418 | 367 | 27741 | 275 | 721191 | wgEncodeAv | ChIP K562 COR   | 1 | 35741 |
| dms.bed | encode_tfbs | CTCF      | Blood        | GM12891              | 1.2167E-05 | 0.09393245 | 1 | 368 | 420 | 315 | 420 | 368 | 27916 | 275 | 721016 | wgEncodeAv | ChIP GM12891    | 1 | 42632 |
| dms.bed | codex       | TCF3      | Blood        | Leukaemia cell       | 1.161E-05  | 0.14889779 | 2 | 369 | 365 | 211 | 369 | 315 | 34995 | 274 | 713937 | GSM108230! | Juvenile acute  | 1 | 43270 |
| dms.bed | codex       | MYB       | Blood        | T-Cell               | 1.001E-05  | 0.14707581 | 2 | 370 | 367 | 211 | 370 | 316 | 35408 | 274 | 713524 | GSM144200! | codex T-Cell M' | 1 | 30659 |
| dms.bed | encode_tfbs | CTCF      | Brain        | Gliobla              | 6.3088E-06 | 0.08828918 | 1 | 372 | 423 | 315 | 423 | 370 | 29630 | 275 | 719302 | wgEncodeAv | ChIP Gliobla CT | 1 | 62772 |
| dms.bed | encode_tfbs | CTCF      | Blood vessel | HBMEC                | 6.0783E-06 | 0.08798926 | 1 | 373 | 424 | 315 | 424 | 371 | 29727 | 275 | 719205 | wgEncodeAv | ChIP HBMEC CT   | 1 | 58376 |
| dms.bed | codex       | CTCF      | Blood        | Erythroid Progenitor | 5.8765E-06 | 0.08771887 | 1 | 374 | 425 | 315 | 425 | 371 | 29815 | 275 | 719117 | GSM651543  | CD36+ erythro   | 1 | 21602 |
| dms.bed | encode_tfbs | YY1       | ESC          | H1-hESC              | 3.4388E-06 | 0.08363613 | 1 | 375 | 430 | 315 | 430 | 373 | 31210 | 275 | 717722 | wgEncodeAv | ChIP H1-hESC Y  | 1 | 18328 |
| dms.bed | encode_tfbs | CTCF      | Blood        | GM19238              | 2.7333E-06 | 0.08199832 | 1 | 376 | 433 | 315 | 433 | 375 | 31807 | 275 | 717125 | wgEncodeAv | ChIP GM19238    | 1 | 49938 |
| dms.bed | encode_tfbs | CTCF      | Lung         | A549                 | 2.5631E-06 | 0.08155112 | 1 | 377 | 435 | 315 | 435 | 376 | 31974 | 275 | 716958 | wgEncodeAv | ChIP A549 CTCI  | 1 | 55351 |
| dms.bed | encode_tfbs | NFKB      | Blood        | GM15510              | 2.2809E-06 | 0.08075155 | 1 | 378 | 437 | 315 | 437 | 377 | 32277 | 275 | 716655 | wgEncodeAv | ChIP GM15510    | 1 | 12803 |
| dms.bed | encode_tfbs | NFKB      | Blood        | GM12891              | 1.5727E-06 | 0.07830219 | 1 | 380 | 440 | 315 | 440 | 378 | 33242 | 275 | 715690 | wgEncodeAv | ChIP GM12891    | 1 | 28683 |
| dms.bed | encode_tfbs | GABP      | Lung         | A549                 | 9.0247E-07 | 0.07490291 | 1 | 381 | 442 | 315 | 442 | 379 | 34681 | 275 | 714251 | wgEncodeAv | ChIP A549 GAB   | 1 | 12348 |
| dms.bed | encode_tfbs | YY1       | Lung         | A549                 | 4.1467E-07 | 0.07060111 | 1 | 383 | 448 | 315 | 448 | 382 | 36691 | 275 | 712241 | wgEncodeAv | ChIP A549 YY1_  | 1 | 10259 |
| dms.bed | codex       | SPI1      | Blood        | Monocyte             | 3.6532E-07 | 0.06994544 | 1 | 384 | 449 | 315 | 449 | 383 | 37018 | 275 | 711914 | GSM785495  | Peripheral bloc | 1 | 33822 |
| dms.bed | encode_tfbs | CHD2      | Cervix       | HeLa-S3              | 3.2541E-07 | 0.14992035 | 3 | 385 | 363 | 155 | 385 | 301 | 51147 | 273 | 697785 | wgEncodeAv | ChIP HeLa-S3 C  | 1 | 20500 |
| dms.bed | encode_tfbs | YY1       | Brain        | SK-N-SH_RA           | 3.0493E-07 | 0.06903084 | 1 | 386 | 450 | 315 | 450 | 384 | 37484 | 275 | 711448 | wgEncodeAv | ChIP SK-N-SH_f  | 1 | 15684 |
| dms.bed | encode_tfbs | ELF1      | Blood        | K562                 | 1.3565E-07 | 0.10857986 | 2 | 390 | 397 | 211 | 397 | 333 | 47170 | 274 | 701762 | wgEncodeAv | ChIP K562 ELF1  | 1 | 27780 |
| dms.bed | encode_tfbs | CREB1     | Lung         | A549                 | 1.336E-07  | 0.10847922 | 2 | 391 | 398 | 211 | 398 | 333 | 47211 | 274 | 701721 | wgEncodeAv | ChIP A549 CREI  | 1 | 15913 |
| dms.bed | encode_tfbs | GABP      | Liver        | HepG2                | 1.1616E-07 | 0.06451541 | 1 | 392 | 457 | 315 | 457 | 388 | 39968 | 275 | 708964 | wgEncodeAv | ChIP HepG2 GA   | 1 | 10109 |
| dms.bed | encode_tfbs | TCF7L2    | Colon        | HCT-116              | 8.9446E-08 | 0.06339036 | 1 | 393 | 458 | 315 | 458 | 389 | 40639 | 275 | 708293 | wgEncodeAv | ChIP HCT-116 T  | 1 | 19463 |
| dms.bed | encode_tfbs | Ini1      | Cervix       | HeLa-S3              | 8.5128E-08 | 0.06318159 | 1 | 394 | 459 | 315 | 459 | 389 | 40766 | 275 | 708166 | wgEncodeAv | ChIP HeLa-S3 Ir | 1 | 7780  |
| dms.bed | codex       | MYB       | Blood        | T-Cell               | 8.0671E-08 | 0.06295621 | 1 | 395 | 460 | 315 | 460 | 390 | 40904 | 275 | 708028 | GSM151963! | codex T-Cell M' | 1 | 20147 |
| dms.bed | codex       | RUNX1     | Blood        | Acute Myeloid Leuke  | 6.7981E-08 | 0.06224924 | 1 | 396 | 462 | 315 | 462 | 391 | 41343 | 275 | 707589 | GSM722708  | Peripheral bloc | 1 | 44582 |
| dms.bed | codex       | SAP30     | ESC          | Embryonic Stem Cell  | 6.2635E-08 | 0.06191633 | 1 | 397 | 463 | 315 | 463 | 392 | 41553 | 275 | 707379 | GSM831040  | K562 erythrocy  | 1 | 16520 |
| dms.bed | encode_tfbs | Pol2-4H8  | Brain        | SK-N-MC              | 3.4166E-08 | 0.05955658 | 1 | 400 | 466 | 315 | 466 | 394 | 43105 | 275 | 705827 | wgEncodeAv | ChIP SK-N-MC I  | 1 | 24130 |
| dms.bed | codex       | RUNX1     | Blood        | Lymphoma cell        | 2.3731E-08 | 0.09815646 | 2 | 402 | 413 | 211 | 413 | 342 | 51832 | 274 | 697100 | GSM125293  | T cell Lymphob  | 1 | 26549 |
| dms.bed | encode_tfbs | Max       | Cervix       | HeLa-S3              | 2.1639E-08 | 0.15565589 | 4 | 404 | 357 | 127 | 404 | 296 | 64649 | 272 | 684283 | wgEncodeAv | ChIP HeLa-S3 N  | 1 | 29647 |
| dms.bed | encode_tfbs | MAZ       | Liver        | HepG2                | 1.7813E-08 | 0.05720827 | 1 | 405 | 467 | 315 | 467 | 396 | 44769 | 275 | 704163 | wgEncodeAv | ChIP HepG2 M,   | 1 | 12090 |
| dms.bed | encode_tfbs | Max       | Blood        | NB4                  | 1.6541E-08 | 0.05695254 | 1 | 406 | 468 | 315 | 468 | 396 | 44958 | 275 | 703974 | wgEncodeAv | ChIP NB4 Max    | 1 | 34659 |
| dms.bed | encode_tfbs | RUNX3     | Blood        | GM12878              | 1.1271E-08 | 0.05566286 | 1 | 407 | 469 | 315 | 469 | 397 | 45936 | 275 | 702996 | wgEncodeAv | ChIP GM12878    | 1 | 67965 |
| dms.bed | codex       | EP300     | Blood        | Leukaemia cell       | 9.3196E-09 | 0.09334446 | 2 | 410 | 421 | 211 | 421 | 347 | 54310 | 274 | 694622 | GSM112231  | Acute myelom    | 1 | 33890 |



|         |             |           |              |                       |            |            |   |     |     |     |     |     |        |     |        |                            |                 |        |       |
|---------|-------------|-----------|--------------|-----------------------|------------|------------|---|-----|-----|-----|-----|-----|--------|-----|--------|----------------------------|-----------------|--------|-------|
| dms.bed | encode_tfbs | Pol2-4H8  | Blood        | K562                  | 8.0305E-09 | 0.05456959 | 1 | 412 | 471 | 315 | 471 | 399 | 46799  | 275 | 702133 | wgEncodeAv                 | ChIP K562 Pol2  | 1      | 23352 |
| dms.bed | encode_tfbs | c-Myc     | Blood        | NB4                   | 4.6042E-09 | 0.0528629  | 1 | 413 | 474 | 315 | 474 | 401 | 48213  | 275 | 700719 | wgEncodeAv                 | ChIP NB4 c-My   | 1      | 26252 |
| dms.bed | codex       | P300      | Blood        | Lymphoma cell         | 4.4649E-09 | 0.05277166 | 1 | 414 | 475 | 315 | 475 | 401 | 48291  | 275 | 700641 | GSM125294: T cell Lymphob  | 1               | 19253  |       |
| dms.bed | encode_tfbs | FOXP2     | Brain        | PFSK-1                | 4.323E-09  | 0.05267607 | 1 | 415 | 476 | 315 | 476 | 402 | 48373  | 275 | 700559 | wgEncodeAv                 | ChIP PFSK-1 FO  | 1      | 18182 |
| dms.bed | encode_tfbs | TAF1      | Cervix       | HeLa-S3               | 3.4917E-09 | 0.05205225 | 1 | 416 | 477 | 315 | 477 | 403 | 48915  | 275 | 700017 | wgEncodeAv                 | ChIP HeLa-S3 T  | 1      | 16100 |
| dms.bed | encode_tfbs | Max       | Blood        | K562                  | 3.0677E-09 | 0.11761528 | 3 | 417 | 388 | 155 | 417 | 320 | 63995  | 273 | 684937 | wgEncodeAv                 | ChIP K562 Max   | 1      | 31436 |
| dms.bed | encode_tfbs | YY1       | Liver        | HepG2                 | 2.3409E-09 | 0.08702713 | 2 | 418 | 426 | 211 | 426 | 352 | 57947  | 274 | 690985 | wgEncodeAv                 | ChIP HepG2 YY   | 1      | 17876 |
| dms.bed | encode_tfbs | Egr-1     | Blood        | K562                  | 1.7254E-09 | 0.05009102 | 1 | 419 | 480 | 315 | 480 | 405 | 50701  | 275 | 698231 | wgEncodeAv                 | ChIP K562 Egr-  | 1      | 36997 |
| dms.bed | codex       | POLR2A    | Blood        | Erythrocytic leukaem  | 5.4606E-10 | 0.04718015 | 1 | 421 | 481 | 315 | 481 | 406 | 53606  | 275 | 695326 | GSM831016: K562 erythrocy  | 1               | 35672  |       |
| dms.bed | encode_tfbs | Sin3Ak-20 | Liver        | HepG2                 | 3.6533E-10 | 0.04623883 | 1 | 422 | 482 | 315 | 482 | 406 | 54618  | 275 | 694314 | wgEncodeAv                 | ChIP HepG2 Sir  | 1      | 16459 |
| dms.bed | encode_tfbs | Mxi1      | Blood        | GM12878               | 1.4734E-10 | 0.04423994 | 1 | 424 | 488 | 315 | 488 | 409 | 56899  | 275 | 692033 | wgEncodeAv                 | ChIP GM12878    | 1      | 17735 |
| dms.bed | codex       | NOTCH1    | Blood        | T-cell acute lymphobl | 1.1641E-10 | 0.10216501 | 3 | 425 | 409 | 155 | 425 | 330 | 72733  | 273 | 676199 | GSM959056: ChIP-seq_ICN1   | 1               | 43398  |       |
| dms.bed | encode_tfbs | E2F6      | Blood        | K562                  | 9.2855E-11 | 0.04328607 | 1 | 426 | 489 | 315 | 489 | 410 | 58056  | 275 | 690876 | wgEncodeAv                 | ChIP K562 E2F6  | 1      | 16312 |
| dms.bed | encode_tfbs | c-Myc     | Breast       | MCF-7                 | 7.8605E-11 | 0.04295154 | 1 | 427 | 490 | 315 | 490 | 411 | 58473  | 275 | 690459 | wgEncodeAv                 | ChIP MCF-7 c-N  | 1      | 20956 |
| dms.bed | codex       | BRD4      | Blood        | Lymphoma cell         | 6.7824E-11 | 0.07411059 | 2 | 429 | 444 | 211 | 444 | 361 | 67140  | 274 | 681792 | GSM125294: T cell Lymphob  | 1               | 23553  |       |
| dms.bed | encode_tfbs | TBP       | ESC          | H1-hESC               | 5.6697E-11 | 0.04230975 | 1 | 430 | 491 | 315 | 491 | 412 | 59290  | 275 | 689642 | wgEncodeAv                 | ChIP H1-hESC T  | 1      | 17194 |
| dms.bed | encode_tfbs | E2F6      | Blood        | K562                  | 4.7443E-11 | 0.07301238 | 2 | 432 | 446 | 211 | 446 | 363 | 68058  | 274 | 680874 | wgEncodeAv                 | ChIP K562 E2F6  | 1      | 24570 |
| dms.bed | encode_tfbs | Pol2      | Liver        | HepG2                 | 2.6133E-11 | 0.04085951 | 1 | 433 | 493 | 315 | 493 | 414 | 61223  | 275 | 687709 | wgEncodeAv                 | ChIP HepG2 Po   | 1      | 22928 |
| dms.bed | encode_tfbs | ELF1      | Blood        | GM12878               | 2.0531E-11 | 0.04042708 | 1 | 435 | 494 | 315 | 494 | 415 | 61824  | 275 | 687108 | wgEncodeAv                 | ChIP GM12878    | 1      | 23008 |
| dms.bed | encode_tfbs | c-Myc     | Breast       | MCF-7                 | 2.0416E-11 | 0.04041711 | 1 | 436 | 495 | 315 | 495 | 415 | 61838  | 275 | 687094 | wgEncodeAv                 | ChIP MCF-7 c-N  | 1      | 27697 |
| dms.bed | encode_tfbs | Pol2-4H8  | Blood vessel | HUVEC                 | 1.7981E-11 | 0.09501892 | 3 | 437 | 416 | 155 | 437 | 336 | 77636  | 273 | 671296 | wgEncodeAv                 | ChIP HUVEC Po   | 1      | 32525 |
| dms.bed | codex       | CBFB      | Blood        | Leukaemia cell        | 1.198E-11  | 0.03949257 | 1 | 438 | 497 | 315 | 497 | 417 | 63164  | 275 | 685768 | GSM112232: U937 (histiocy  | 1               | 15852  |       |
| dms.bed | encode_tfbs | c-Myc     | Blood        | K562                  | 1.0626E-11 | 0.03929011 | 1 | 439 | 498 | 315 | 498 | 417 | 63462  | 275 | 685470 | wgEncodeAv                 | ChIP K562 c-M   | 1      | 24153 |
| dms.bed | encode_tfbs | Pol2      | Liver        | HepG2                 | 9.597E-12  | 0.03911971 | 1 | 440 | 499 | 315 | 499 | 418 | 63715  | 275 | 685217 | wgEncodeAv                 | ChIP HepG2 Po   | 1      | 15108 |
| dms.bed | encode_tfbs | c-Myc     | Blood        | K562                  | 3.5358E-12 | 0.03752146 | 1 | 441 | 500 | 315 | 500 | 419 | 66190  | 275 | 682742 | wgEncodeAv                 | ChIP K562 c-M   | 1      | 31092 |
| dms.bed | codex       | POLR2A    | Blood        | Erythroblast          | 3.0954E-12 | 0.06556438 | 2 | 442 | 454 | 211 | 454 | 369 | 75014  | 274 | 673918 | GSM970259: Proerythroblas  | 1               | 35015  |       |
| dms.bed | codex       | CBFB      | Blood        | Leukaemia cell        | 1.7714E-12 | 0.03648645 | 1 | 446 | 501 | 315 | 501 | 421 | 67898  | 275 | 681034 | GSM112230: Acute myelom    | 1               | 12533  |       |
| dms.bed | encode_tfbs | Pol2      | Liver        | HepG2                 | 1.4459E-12 | 0.0867978  | 3 | 447 | 427 | 155 | 447 | 343 | 84163  | 273 | 664769 | wgEncodeAv                 | ChIP HepG2 Po   | 1      | 25927 |
| dms.bed | codex       | RUNX3     | Blood        | B-cells               | 6.3438E-13 | 0.06187883 | 2 | 449 | 464 | 211 | 464 | 375 | 79010  | 274 | 669922 | GSM101089: GM12878 cell f  | 1               | 104018 |       |
| dms.bed | encode_tfbs | MAZ       | Blood        | K562                  | 5.8853E-13 | 0.03494482 | 1 | 450 | 502 | 315 | 502 | 422 | 70612  | 275 | 678320 | wgEncodeAv                 | ChIP K562 MAZ   | 1      | 33323 |
| dms.bed | encode_tfbs | TAF1      | Liver        | HepG2                 | 2.8236E-13 | 0.03398455 | 1 | 452 | 504 | 315 | 504 | 424 | 72415  | 275 | 676517 | wgEncodeAv                 | ChIP HepG2 TA   | 1      | 16659 |
| dms.bed | codex       | ERG       | Blood        | Leukaemia cell        | 2.0762E-13 | 0.08135563 | 3 | 454 | 436 | 155 | 454 | 348 | 89123  | 273 | 659809 | GSM112231: Acute myelom    | 1               | 25083  |       |
| dms.bed | encode_tfbs | HMG3      | Blood        | K562                  | 1.582E-13  | 0.03326177 | 1 | 455 | 506 | 315 | 506 | 425 | 73834  | 275 | 675098 | wgEncodeAv                 | ChIP K562 HMC   | 1      | 14587 |
| dms.bed | encode_tfbs | Pol2      | Cervix       | HeLa-S3               | 6.731E-14  | 0.03224784 | 1 | 457 | 510 | 315 | 510 | 427 | 75921  | 275 | 673011 | wgEncodeAv                 | ChIP HeLa-S3 P  | 1      | 15736 |
| dms.bed | encode_tfbs | Pol2      | Breast       | MCF-7                 | 5.487E-14  | 0.03201408 | 1 | 458 | 511 | 315 | 511 | 428 | 76419  | 275 | 672513 | wgEncodeAv                 | ChIP MCF-7 Po   | 1      | 20449 |
| dms.bed | encode_tfbs | Pol2      | Uterus       | ECC-1                 | 1.5815E-14 | 0.03065496 | 1 | 460 | 513 | 315 | 513 | 429 | 79449  | 275 | 669483 | wgEncodeAv                 | ChIP ECC-1 Pol: | 1      | 20137 |
| dms.bed | encode_tfbs | Pol2-4H8  | Colon        | HCT-116               | 1.244E-14  | 0.03041036 | 1 | 462 | 514 | 315 | 514 | 430 | 80020  | 275 | 668912 | wgEncodeAv                 | ChIP HCT-116 F  | 1      | 29178 |
| dms.bed | codex       | CBFB      | Blood        | Leukaemia cell        | 6.2681E-15 | 0.02971338 | 1 | 466 | 515 | 315 | 515 | 432 | 81693  | 275 | 667239 | GSM112230: Acute myelom    | 1               | 18365  |       |
| dms.bed | codex       | BCOR      | Blood        | B-Cells               | 1.7358E-15 | 0.02850598 | 1 | 467 | 517 | 315 | 517 | 433 | 84763  | 275 | 664169 | GSM898061: Cell line: Germ | 1               | 31772  |       |
| dms.bed | encode_tfbs | Max       | Blood        | K562                  | 1.2536E-15 | 0.0505651  | 2 | 468 | 478 | 211 | 478 | 386 | 94456  | 274 | 654476 | wgEncodeAv                 | ChIP K562 Max   | 1      | 46171 |
| dms.bed | encode_tfbs | HA-E2F1   | Breast       | MCF-7                 | 7.2325E-16 | 0.02770938 | 1 | 471 | 520 | 315 | 520 | 435 | 86918  | 275 | 662014 | wgEncodeAv                 | ChIP MCF-7 HA   | 1      | 21946 |
| dms.bed | codex       | KDM4A     | ESC          | Embryonic Stem Cell   | 0          | 0.04446761 | 2 | 478 | 487 | 211 | 487 | 392 | 105580 | 274 | 643352 | GSM831035: K562 erythrocy  | 1               | 20642  |       |
| dms.bed | encode_tfbs | Pol2      | Lung         | A549                  | 0          | 0.03974337 | 2 | 478 | 496 | 211 | 496 | 395 | 116181 | 274 | 632751 | wgEncodeAv                 | ChIP A549 Pol2  | 1      | 27603 |
| dms.bed | encode_tfbs | Pol2      | Lung         | A549                  | 0          | 0.01994613 | 1 | 478 | 526 | 315 | 526 | 440 | 115547 | 275 | 633385 | wgEncodeAv                 | ChIP A549 Pol2  | 1      | 27685 |
| dms.bed | encode_tfbs | Pol2      | Blood        | GM12878               | 0          | 0.01607451 | 1 | 478 | 530 | 315 | 530 | 441 | 138258 | 275 | 610674 | wgEncodeAv                 | ChIP GM12878    | 1      | 27558 |
| dms.bed | codex       | STAT5     | Blood        | Erythroid Leukaemia   | 0          | 0          | 0 | 478 | 534 | 534 | 534 | 515 | 92     | 276 | 748840 | BG22_STAT5 No drug (DMSC   | 1               | 127    |       |
| dms.bed | codex       | RUNX1T1   | Blood        | Leukaemia cell        | 0          | 0          | 0 | 478 | 534 | 534 | 534 | 515 | 52486  | 276 | 696446 | GSM108230: Juvenile acute  | 1               | 16941  |       |
| dms.bed | codex       | TCF12     | Blood        | Leukaemia cell        | 0          | 0          | 0 | 478 | 534 | 534 | 534 | 515 | 38783  | 276 | 710149 | GSM108230: Juvenile acute  | 1               | 18869  |       |
| dms.bed | codex       | BCL6      | Blood        | Lymphoma cell         | 0          | 0          | 0 | 478 | 534 | 534 | 534 | 515 | 29301  | 276 | 719631 | GSM108480: Adult B cell No | 1               | 8053   |       |
| dms.bed | codex       | ERG       | Blood        | Hematopoietic Stem    | 0          | 0          | 0 | 478 | 534 | 534 | 534 | 515 | 3240   | 276 | 745692 | GSM109787: Mobilised CD3·  | 1               | 2783   |       |
| dms.bed | codex       | FLI1      | Blood        | Hematopoietic Stem    | 0          | 0          | 0 | 478 | 534 | 534 | 534 | 515 | 15727  | 276 | 733205 | GSM109788: Mobilised CD3·  | 1               | 10750  |       |
| dms.bed | codex       | TAL1      | Blood        | Hematopoietic Stem    | 0          | 0          | 0 | 478 | 534 | 534 | 534 | 515 | 1267   | 276 | 747665 | GSM109788: Mobilised CD3·  | 1               | 528    |       |
| dms.bed | codex       | LYL1      | Blood        | Hematopoietic Stem    | 0          | 0          | 0 | 478 | 534 | 534 | 534 | 515 | 961    | 276 | 747971 | GSM109788: Mobilised CD3·  | 1               | 1972   |       |
| dms.bed | codex       | GATA2     | Blood        | Hematopoietic Stem    | 0          | 0          | 0 | 478 | 534 | 534 | 534 | 515 | 3137   | 276 | 745795 | GSM109788: Mobilised CD3·  | 1               | 7046   |       |
| dms.bed | codex       | RUNX1     | Blood        | Hematopoietic Stem    | 0          | 0          | 0 | 478 | 534 | 534 | 534 | 515 | 28103  | 276 | 720829 | GSM109788: Mobilised CD3·  | 1               | 14287  |       |
| dms.bed | codex       | LMO2      | Blood        | Hematopoietic Stem    | 0          | 0          | 0 | 478 | 534 | 534 | 534 | 515 | 2118   | 276 | 746814 | GSM109788: Mobilised CD3·  | 1               | 1790   |       |
| dms.bed | codex       | MYH11     | Blood        | Leukaemia cell        | 0          | 0          | 0 | 478 | 534 | 534 | 534 | 515 | 53746  | 276 | 695186 | GSM112230: Acute myelom    | 1               | 9071   |       |

|         |       |        |             |                     |   |   |   |     |     |     |     |     |       |     |        |            |                  |   |       |
|---------|-------|--------|-------------|---------------------|---|---|---|-----|-----|-----|-----|-----|-------|-----|--------|------------|------------------|---|-------|
| dms.bed | codex | MYH11  | Blood       | Leukaemia cell      | 0 | 0 | 0 | 478 | 534 | 534 | 534 | 515 | 21208 | 276 | 727724 | GSM112230! | Acute myelom     | 1 | 6452  |
| dms.bed | codex | RUNX1  | Blood       | Leukaemia cell      | 0 | 0 | 0 | 478 | 534 | 534 | 534 | 515 | 71939 | 276 | 676993 | GSM112230! | Acute myelom     | 1 | 17308 |
| dms.bed | codex | MED21  | Blood       | Leukaemia cell      | 0 | 0 | 0 | 478 | 534 | 534 | 534 | 515 | 61895 | 276 | 687037 | GSM112230! | Acute myelom     | 1 | 10213 |
| dms.bed | codex | TBP    | Blood       | Leukaemia cell      | 0 | 0 | 0 | 478 | 534 | 534 | 534 | 515 | 52425 | 276 | 696507 | GSM112230! | Acute myelom     | 1 | 8207  |
| dms.bed | codex | TCF12  | Blood       | Leukaemia cell      | 0 | 0 | 0 | 478 | 534 | 534 | 534 | 515 | 70117 | 276 | 678815 | GSM112230! | Acute myelom     | 1 | 17269 |
| dms.bed | codex | GATA2  | Blood       | Leukaemia cell      | 0 | 0 | 0 | 478 | 534 | 534 | 534 | 515 | 35647 | 276 | 713285 | GSM112231! | Acute myelom     | 1 | 6162  |
| dms.bed | codex | TAL1   | Blood       | Leukaemia cell      | 0 | 0 | 0 | 478 | 534 | 534 | 534 | 515 | 50332 | 276 | 698600 | GSM112231! | Acute myelom     | 1 | 9472  |
| dms.bed | codex | FLI1   | Blood       | Leukaemia cell      | 0 | 0 | 0 | 478 | 534 | 534 | 534 | 515 | 25340 | 276 | 723592 | GSM112231! | Acute myelom     | 1 | 4027  |
| dms.bed | codex | ELF1   | Blood       | Leukaemia cell      | 0 | 0 | 0 | 478 | 534 | 534 | 534 | 515 | 61611 | 276 | 687321 | GSM112231! | Acute myelom     | 1 | 9602  |
| dms.bed | codex | SPI1   | Blood       | Leukaemia cell      | 0 | 0 | 0 | 478 | 534 | 534 | 534 | 515 | 31489 | 276 | 717443 | GSM112231! | Acute myelom     | 1 | 5553  |
| dms.bed | codex | HDAC1  | Blood       | Leukaemia cell      | 0 | 0 | 0 | 478 | 534 | 534 | 534 | 515 | 49047 | 276 | 699885 | GSM112231! | Acute myelom     | 1 | 20782 |
| dms.bed | codex | MYH11  | Blood       | Leukaemia cell      | 0 | 0 | 0 | 478 | 534 | 534 | 534 | 515 | 47398 | 276 | 701534 | GSM112231! | CD34+ acute m    | 1 | 7941  |
| dms.bed | codex | CBFB   | Blood       | Leukaemia cell      | 0 | 0 | 0 | 478 | 534 | 534 | 534 | 515 | 38395 | 276 | 710537 | GSM112232! | CD34+ acute m    | 1 | 6608  |
| dms.bed | codex | FOXA2  | Endoderm    | Endoderm            | 0 | 0 | 0 | 478 | 534 | 534 | 534 | 515 | 89070 | 276 | 659862 | GSM112406! | Day 5 of in vitr | 1 | 31741 |
| dms.bed | codex | SOX2   | ESC         | Embryonic Stem Cell | 0 | 0 | 0 | 478 | 534 | 534 | 534 | 515 | 372   | 276 | 748560 | GSM112406! | codex Embryor    | 1 | 2311  |
| dms.bed | codex | SOX2   | ESC         | Embryonic Stem Cell | 0 | 0 | 0 | 478 | 534 | 534 | 534 | 515 | 847   | 276 | 748085 | GSM112406! | codex Embryor    | 1 | 5206  |
| dms.bed | codex | NANOG  | ESC         | Embryonic Stem Cell | 0 | 0 | 0 | 478 | 534 | 534 | 534 | 515 | 2133  | 276 | 746799 | GSM112407! | codex Embryor    | 1 | 13465 |
| dms.bed | codex | NANOG  | ESC         | Embryonic Stem Cell | 0 | 0 | 0 | 478 | 534 | 534 | 534 | 515 | 2369  | 276 | 746563 | GSM112407! | codex Embryor    | 1 | 18537 |
| dms.bed | codex | MAFK   | Blood       | Lymphoma cell       | 0 | 0 | 0 | 478 | 534 | 534 | 534 | 515 | 3394  | 276 | 745538 | GSM115967! | Adult B cell No  | 1 | 6721  |
| dms.bed | codex | POLR2A | Blood       | Leukemia cell       | 0 | 0 | 0 | 478 | 534 | 534 | 534 | 515 | 57199 | 276 | 691733 | GSM122478! | Jurkat T-ALL ce  | 1 | 12283 |
| dms.bed | codex | POLR2A | Blood       | Leukemia cell       | 0 | 0 | 0 | 478 | 534 | 534 | 534 | 515 | 29142 | 276 | 719790 | GSM122478! | Jurkat T-ALL ce  | 1 | 4956  |
| dms.bed | codex | POLR2A | Blood       | Leukemia cell       | 0 | 0 | 0 | 478 | 534 | 534 | 534 | 515 | 62202 | 276 | 686730 | GSM122478! | Jurkat T-ALL ce  | 1 | 17457 |
| dms.bed | codex | POLR2A | Blood       | Leukemia cell       | 0 | 0 | 0 | 478 | 534 | 534 | 534 | 515 | 53258 | 276 | 695674 | GSM122478! | Jurkat T-ALL ce  | 1 | 11078 |
| dms.bed | codex | ETS1   | Blood       | Lymphoma cell       | 0 | 0 | 0 | 478 | 534 | 534 | 534 | 515 | 75691 | 276 | 673241 | GSM125292! | T cell Lymphob   | 1 | 41378 |
| dms.bed | codex | GABPA  | Blood       | Lymphoma cell       | 0 | 0 | 0 | 478 | 534 | 534 | 534 | 515 | 7350  | 276 | 741582 | GSM125293! | T cell Lymphob   | 1 | 14021 |
| dms.bed | codex | NOTCH1 | Blood       | Lymphoma cell       | 0 | 0 | 0 | 478 | 534 | 534 | 534 | 515 | 15292 | 276 | 733640 | GSM125293! | T cell Lymphob   | 1 | 3633  |
| dms.bed | codex | RBPJ   | Blood       | Lymphoma cell       | 0 | 0 | 0 | 478 | 534 | 534 | 534 | 515 | 17978 | 276 | 730954 | GSM125293! | T cell Lymphob   | 1 | 4115  |
| dms.bed | codex | NOTCH1 | Blood       | Lymphoma cell       | 0 | 0 | 0 | 478 | 534 | 534 | 534 | 515 | 41923 | 276 | 707009 | GSM125293! | T cell Lymphob   | 1 | 10849 |
| dms.bed | codex | RBPJ   | Blood       | Lymphoma cell       | 0 | 0 | 0 | 478 | 534 | 534 | 534 | 515 | 36313 | 276 | 712619 | GSM125293! | T cell Lymphob   | 1 | 9754  |
| dms.bed | codex | MED1   | Blood       | Lymphoma cell       | 0 | 0 | 0 | 478 | 534 | 534 | 534 | 515 | 68208 | 276 | 680724 | GSM125294! | T cell Lymphob   | 1 | 27299 |
| dms.bed | codex | NR2F2  | Endometrium | Endometrial Stromal | 0 | 0 | 0 | 478 | 534 | 534 | 534 | 515 | 4924  | 276 | 744008 | GSM125739! | codex Endome     | 1 | 19929 |
| dms.bed | codex | TAL1   | Blood       | Erythroblast        | 0 | 0 | 0 | 478 | 534 | 534 | 534 | 515 | 4966  | 276 | 743966 | GSM127824! | Proerythroblas   | 1 | 18003 |
| dms.bed | codex | GFI1B  | Blood       | Erythroblast        | 0 | 0 | 0 | 478 | 534 | 534 | 534 | 515 | 612   | 276 | 748320 | GSM127824! | Proerythroblas   | 1 | 3000  |
| dms.bed | codex | CDK7   | Blood       | Leukemia cell       | 0 | 0 | 0 | 478 | 534 | 534 | 534 | 515 | 48628 | 276 | 700304 | GSM129638! | Untreated Jurk   | 1 | 14641 |
| dms.bed | codex | CDK7   | Blood       | Multiple myeloma ce | 0 | 0 | 0 | 478 | 534 | 534 | 534 | 515 | 11575 | 276 | 737357 | GSM131392! | MM1-S cell line  | 1 | 3839  |
| dms.bed | codex | POLR2A | Blood       | Multiple myeloma ce | 0 | 0 | 0 | 478 | 534 | 534 | 534 | 515 | 58236 | 276 | 690696 | GSM131392! | MM1-S cell line  | 1 | 13717 |
| dms.bed | codex | CDK9   | Blood       | Multiple myeloma ce | 0 | 0 | 0 | 478 | 534 | 534 | 534 | 515 | 29010 | 276 | 719922 | GSM131392! | MM1-S cell line  | 1 | 7705  |
| dms.bed | codex | EP300  | Blood       | Acute Myeloid Leuke | 0 | 0 | 0 | 478 | 534 | 534 | 534 | 515 | 258   | 276 | 748674 | GSM146600! | Kasumi-1 (AML    | 1 | 581   |
| dms.bed | codex | EP300  | Blood       | Acute Myeloid Leuke | 0 | 0 | 0 | 478 | 534 | 534 | 534 | 515 | 336   | 276 | 748596 | GSM146600! | Kasumi-1 (AML    | 1 | 839   |
| dms.bed | codex | CEBPA  | Blood       | Acute Myeloid Leuke | 0 | 0 | 0 | 478 | 534 | 534 | 534 | 515 | 243   | 276 | 748689 | GSM150116! | Kasumi-1 (AML    | 1 | 612   |
| dms.bed | codex | CEBPA  | Blood       | Acute Myeloid Leuke | 0 | 0 | 0 | 478 | 534 | 534 | 534 | 515 | 2915  | 276 | 746017 | GSM150116! | Kasumi-1 (AML    | 1 | 7279  |
| dms.bed | codex | SPI1   | Blood       | Acute Myeloid Leuke | 0 | 0 | 0 | 478 | 534 | 534 | 534 | 515 | 9035  | 276 | 739897 | GSM150116! | Kasumi-1 (AML    | 1 | 25538 |
| dms.bed | codex | SPI1   | Blood       | Acute Myeloid Leuke | 0 | 0 | 0 | 478 | 534 | 534 | 534 | 515 | 12422 | 276 | 736510 | GSM150116! | Kasumi-1 (AML    | 1 | 21287 |
| dms.bed | codex | MYB    | Blood       | T-Cell              | 0 | 0 | 0 | 478 | 534 | 534 | 534 | 515 | 47938 | 276 | 700994 | GSM151963! | codex T-Cell M   | 1 | 26035 |
| dms.bed | codex | MYB    | Blood       | T-Cell              | 0 | 0 | 0 | 478 | 534 | 534 | 534 | 515 | 49047 | 276 | 699885 | GSM151964! | codex T-Cell M   | 1 | 24032 |
| dms.bed | codex | MYB    | Blood       | T-Cell              | 0 | 0 | 0 | 478 | 534 | 534 | 534 | 515 | 45095 | 276 | 703837 | GSM151964! | codex T-Cell M   | 1 | 21401 |
| dms.bed | codex | GATA1  | Blood       | Myeloid Leukemia    | 0 | 0 | 0 | 478 | 534 | 534 | 534 | 515 | 3042  | 276 | 745890 | GSM467647! | Human K562 er    | 1 | 4065  |
| dms.bed | codex | GATA2  | Blood       | Myeloid Leukemia    | 0 | 0 | 0 | 478 | 534 | 534 | 534 | 515 | 3444  | 276 | 745488 | GSM467648! | Human K562 er    | 1 | 8820  |
| dms.bed | codex | GATA1  | Blood       | Megakaryocyte       | 0 | 0 | 0 | 478 | 534 | 534 | 534 | 515 | 1570  | 276 | 747362 | GSM607949! | CD34+ Umbilic.   | 1 | 1867  |
| dms.bed | codex | GATA2  | Blood       | Megakaryocyte       | 0 | 0 | 0 | 478 | 534 | 534 | 534 | 515 | 680   | 276 | 748252 | GSM607950! | CD34+ Umbilic.   | 1 | 409   |
| dms.bed | codex | RUNX1  | Blood       | Megakaryocyte       | 0 | 0 | 0 | 478 | 534 | 534 | 534 | 515 | 25116 | 276 | 723816 | GSM607951! | CD34+ Umbilic.   | 1 | 7868  |
| dms.bed | codex | FLI1   | Blood       | Megakaryocyte       | 0 | 0 | 0 | 478 | 534 | 534 | 534 | 515 | 10598 | 276 | 738334 | GSM607952! | CD34+ Umbilic.   | 1 | 3674  |
| dms.bed | codex | TAL1   | Blood       | Megakaryocyte       | 0 | 0 | 0 | 478 | 534 | 534 | 534 | 515 | 830   | 276 | 748102 | GSM607953! | CD34+ Umbilic.   | 1 | 1498  |
| dms.bed | codex | RUNX1  | Blood       | Leukaemia cell      | 0 | 0 | 0 | 478 | 534 | 534 | 534 | 515 | 4023  | 276 | 744909 | GSM610330! | Infantile acute  | 1 | 6857  |
| dms.bed | codex | RUNX1  | Blood       | Leukaemia cell      | 0 | 0 | 0 | 478 | 534 | 534 | 534 | 515 | 5309  | 276 | 743623 | GSM610332! | Adult chronic n  | 1 | 5430  |
| dms.bed | codex | RUNX1  | Blood       | Leukaemia cell      | 0 | 0 | 0 | 478 | 534 | 534 | 534 | 515 | 17214 | 276 | 731718 | GSM610334! | Adult chronic n  | 1 | 15982 |
| dms.bed | codex | TAL1   | Blood       | Leukaemia cell      | 0 | 0 | 0 | 478 | 534 | 534 | 534 | 515 | 201   | 276 | 748731 | GSM614003! | T-cell acute lyn | 1 | 1077  |

|         |       |         |       |                      |   |   |   |     |     |     |     |     |       |     |        |           |                  |   |       |
|---------|-------|---------|-------|----------------------|---|---|---|-----|-----|-----|-----|-----|-------|-----|--------|-----------|------------------|---|-------|
| dms.bed | codex | TAL1    | Blood | Erythroblast         | 0 | 0 | 0 | 478 | 534 | 534 | 534 | 515 | 1296  | 276 | 747636 | GSM614004 | Proerythroblas   | 1 | 4799  |
| dms.bed | codex | SPI1    | Blood | Umbilical Cord Blood | 0 | 0 | 0 | 478 | 534 | 534 | 534 | 515 | 3754  | 276 | 745178 | GSM638310 | CD133+ Umbili    | 1 | 11445 |
| dms.bed | codex | IKAROS  | Blood | Umbilical Cord Blood | 0 | 0 | 0 | 478 | 534 | 534 | 534 | 515 | 4931  | 276 | 744001 | GSM638312 | CD133+ Umbili    | 1 | 1118  |
| dms.bed | codex | MEIS1   | Blood | Umbilical Cord Blood | 0 | 0 | 0 | 478 | 534 | 534 | 534 | 515 | 159   | 276 | 748773 | GSM638314 | CD133+ Umbili    | 1 | 420   |
| dms.bed | codex | CTCF    | Blood | Hematopoietic Stem   | 0 | 0 | 0 | 478 | 534 | 534 | 534 | 515 | 19640 | 276 | 729292 | GSM651541 | Mobilised CD3+   | 1 | 18624 |
| dms.bed | codex | CTCF    | Blood | Erythroid Progenitor | 0 | 0 | 0 | 478 | 534 | 534 | 534 | 515 | 28903 | 276 | 720029 | GSM651542 | CD36+ erythro    | 1 | 25290 |
| dms.bed | codex | TAL1    | Blood | Erythroid Progenitor | 0 | 0 | 0 | 478 | 534 | 534 | 534 | 515 | 4543  | 276 | 744389 | GSM651544 | CD36+ erythro    | 1 | 9130  |
| dms.bed | codex | GATA1   | Blood | Erythroid Progenitor | 0 | 0 | 0 | 478 | 534 | 534 | 534 | 515 | 12930 | 276 | 736002 | GSM651546 | CD36+ erythro    | 1 | 10328 |
| dms.bed | codex | GATA1   | Blood | Erythroid Progenitor | 0 | 0 | 0 | 478 | 534 | 534 | 534 | 515 | 6335  | 276 | 742597 | GSM651547 | CD36+ erythro    | 1 | 16428 |
| dms.bed | codex | SMARCA4 | Blood | Hematopoietic Stem   | 0 | 0 | 0 | 478 | 534 | 534 | 534 | 515 | 13710 | 276 | 735222 | GSM651552 | Mobilised CD3+   | 1 | 6462  |
| dms.bed | codex | SMARCA4 | Blood | Erythroid Progenitor | 0 | 0 | 0 | 478 | 534 | 534 | 534 | 515 | 1586  | 276 | 747346 | GSM651553 | CD36+ erythro    | 1 | 7687  |
| dms.bed | codex | SMAD1   | Blood | Erythroblast         | 0 | 0 | 0 | 478 | 534 | 534 | 534 | 515 | 223   | 276 | 748709 | GSM722397 | Proerythroblas   | 1 | 1035  |
| dms.bed | codex | SMAD1   | Blood | Erythroblast         | 0 | 0 | 0 | 478 | 534 | 534 | 534 | 515 | 276   | 276 | 748656 | GSM722398 | Proerythroblas   | 1 | 1293  |
| dms.bed | codex | TCF7L2  | Blood | Hematopoietic Stem   | 0 | 0 | 0 | 478 | 534 | 534 | 534 | 515 | 770   | 276 | 748162 | GSM722400 | Mobilised CD3+   | 1 | 9717  |
| dms.bed | codex | TCF7L2  | Blood | Hematopoietic Stem   | 0 | 0 | 0 | 478 | 534 | 534 | 534 | 515 | 2806  | 276 | 746126 | GSM722401 | Mobilised CD3+   | 1 | 3739  |
| dms.bed | codex | TCF7L2  | Blood | Hematopoietic Stem   | 0 | 0 | 0 | 478 | 534 | 534 | 534 | 515 | 3088  | 276 | 745844 | GSM722402 | Mobilised CD3+   | 1 | 6212  |
| dms.bed | codex | RUNX1   | Blood | Acute Myeloid Leuke  | 0 | 0 | 0 | 478 | 534 | 534 | 534 | 515 | 18122 | 276 | 730810 | GSM722704 | Kasumi-1 (AML    | 1 | 10203 |
| dms.bed | codex | RUNX1T1 | Blood | Acute Myeloid Leuke  | 0 | 0 | 0 | 478 | 534 | 534 | 534 | 515 | 3187  | 276 | 745745 | GSM722706 | Kasumi-1 (AML    | 1 | 3283  |
| dms.bed | codex | POLR2A  | Blood | Acute Myeloid Leuke  | 0 | 0 | 0 | 478 | 534 | 534 | 534 | 515 | 44757 | 276 | 704175 | GSM722709 | Kasumi-1 (AML    | 1 | 10124 |
| dms.bed | codex | POLR2A  | Blood | Acute Myeloid Leuke  | 0 | 0 | 0 | 478 | 534 | 534 | 534 | 515 | 42268 | 276 | 706664 | GSM722710 | Kasumi-1 (AML    | 1 | 10018 |
| dms.bed | codex | SPI1    | Blood | Macrophage           | 0 | 0 | 0 | 478 | 534 | 534 | 534 | 515 | 7080  | 276 | 741852 | GSM785501 | Macrophages v    | 1 | 26490 |
| dms.bed | codex | EGR2    | Blood | Macrophage           | 0 | 0 | 0 | 478 | 534 | 534 | 534 | 515 | 4335  | 276 | 744597 | GSM785503 | Macrophages v    | 1 | 1020  |
| dms.bed | codex | CBX8    | Blood | Erythrocytic leukaem | 0 | 0 | 0 | 478 | 534 | 534 | 534 | 515 | 1640  | 276 | 747292 | GSM830987 | K562 erythrocy   | 1 | 7114  |
| dms.bed | codex | CHD1    | Blood | Erythrocytic leukaem | 0 | 0 | 0 | 478 | 534 | 534 | 534 | 515 | 30680 | 276 | 718252 | GSM830988 | K562 erythrocy   | 1 | 6998  |
| dms.bed | codex | HDAC1   | Blood | Erythrocytic leukaem | 0 | 0 | 0 | 478 | 534 | 534 | 534 | 515 | 55005 | 276 | 693927 | GSM830993 | K562 erythrocy   | 1 | 11727 |
| dms.bed | codex | HDAC2   | Blood | Erythrocytic leukaem | 0 | 0 | 0 | 478 | 534 | 534 | 534 | 515 | 22983 | 276 | 725949 | GSM830995 | K562 erythrocy   | 1 | 5605  |
| dms.bed | codex | KDM5C   | Blood | Erythrocytic leukaem | 0 | 0 | 0 | 478 | 534 | 534 | 534 | 515 | 17020 | 276 | 731912 | GSM831000 | K562 erythrocy   | 1 | 3472  |
| dms.bed | codex | CREBBP  | Blood | Erythrocytic leukaem | 0 | 0 | 0 | 478 | 534 | 534 | 534 | 515 | 118   | 276 | 748814 | GSM831001 | K562 erythrocy   | 1 | 2277  |
| dms.bed | codex | NCOR1   | Blood | Erythrocytic leukaem | 0 | 0 | 0 | 478 | 534 | 534 | 534 | 515 | 721   | 276 | 748211 | GSM831004 | K562 erythrocy   | 1 | 624   |
| dms.bed | codex | WHSC1   | Blood | Erythrocytic leukaem | 0 | 0 | 0 | 478 | 534 | 534 | 534 | 515 | 1364  | 276 | 747568 | GSM831005 | K562 erythrocy   | 1 | 2085  |
| dms.bed | codex | EP300   | Blood | Erythrocytic leukaem | 0 | 0 | 0 | 478 | 534 | 534 | 534 | 515 | 1723  | 276 | 747209 | GSM831006 | K562 erythrocy   | 1 | 2174  |
| dms.bed | codex | PHF8    | Blood | Erythrocytic leukaem | 0 | 0 | 0 | 478 | 534 | 534 | 534 | 515 | 72957 | 276 | 675975 | GSM831008 | K562 erythrocy   | 1 | 16510 |
| dms.bed | codex | PHF8    | Blood | Erythrocytic leukaem | 0 | 0 | 0 | 478 | 534 | 534 | 534 | 515 | 73051 | 276 | 675881 | GSM831009 | K562 erythrocy   | 1 | 17229 |
| dms.bed | codex | KDM5B   | Blood | Erythrocytic leukaem | 0 | 0 | 0 | 478 | 534 | 534 | 534 | 515 | 67490 | 276 | 681442 | GSM831010 | K562 erythrocy   | 1 | 21221 |
| dms.bed | codex | KDM5B   | Blood | Erythrocytic leukaem | 0 | 0 | 0 | 478 | 534 | 534 | 534 | 515 | 27359 | 276 | 721573 | GSM831011 | K562 erythrocy   | 1 | 5601  |
| dms.bed | codex | RBBP5   | Blood | Erythrocytic leukaem | 0 | 0 | 0 | 478 | 534 | 534 | 534 | 515 | 70671 | 276 | 678261 | GSM831012 | K562 erythrocy   | 1 | 15698 |
| dms.bed | codex | REST    | Blood | Erythrocytic leukaem | 0 | 0 | 0 | 478 | 534 | 534 | 534 | 515 | 5424  | 276 | 743508 | GSM831015 | K562 erythrocy   | 1 | 5610  |
| dms.bed | codex | RNF2    | Blood | Erythrocytic leukaem | 0 | 0 | 0 | 478 | 534 | 534 | 534 | 515 | 2897  | 276 | 746035 | GSM831017 | K562 erythrocy   | 1 | 4105  |
| dms.bed | codex | SAP30   | Blood | Erythrocytic leukaem | 0 | 0 | 0 | 478 | 534 | 534 | 534 | 515 | 52026 | 276 | 696906 | GSM831018 | K562 erythrocy   | 1 | 10433 |
| dms.bed | codex | SIRT6   | Blood | Erythrocytic leukaem | 0 | 0 | 0 | 478 | 534 | 534 | 534 | 515 | 2900  | 276 | 746032 | GSM831020 | K562 erythrocy   | 1 | 1838  |
| dms.bed | codex | CHD1    | ESC   | Embryonic Stem Cell  | 0 | 0 | 0 | 478 | 534 | 534 | 534 | 515 | 13009 | 276 | 735923 | GSM831025 | K562 erythrocy   | 1 | 4814  |
| dms.bed | codex | EZH2    | ESC   | Embryonic Stem Cell  | 0 | 0 | 0 | 478 | 534 | 534 | 534 | 515 | 13316 | 276 | 735616 | GSM831028 | K562 erythrocy   | 1 | 3205  |
| dms.bed | codex | HDAC2   | ESC   | Embryonic Stem Cell  | 0 | 0 | 0 | 478 | 534 | 534 | 534 | 515 | 45879 | 276 | 703053 | GSM831029 | K562 erythrocy   | 1 | 8835  |
| dms.bed | codex | EP300   | ESC   | Embryonic Stem Cell  | 0 | 0 | 0 | 478 | 534 | 534 | 534 | 515 | 4099  | 276 | 744833 | GSM831036 | K562 erythrocy   | 1 | 2276  |
| dms.bed | codex | PHF8    | ESC   | Embryonic Stem Cell  | 0 | 0 | 0 | 478 | 534 | 534 | 534 | 515 | 77297 | 276 | 671635 | GSM831037 | K562 erythrocy   | 1 | 13630 |
| dms.bed | codex | RBBP5   | ESC   | Embryonic Stem Cell  | 0 | 0 | 0 | 478 | 534 | 534 | 534 | 515 | 65483 | 276 | 683449 | GSM831038 | K562 erythrocy   | 1 | 12525 |
| dms.bed | codex | SUZ12   | ESC   | Embryonic Stem Cell  | 0 | 0 | 0 | 478 | 534 | 534 | 534 | 515 | 13467 | 276 | 735465 | GSM831042 | K562 erythrocy   | 1 | 2682  |
| dms.bed | codex | EP300   | Blood | Leukaemia cell       | 0 | 0 | 0 | 478 | 534 | 534 | 534 | 515 | 3596  | 276 | 745336 | GSM835863 | Acute myeloid    | 1 | 5120  |
| dms.bed | codex | RUNX1   | Blood | Acute Myeloid Leuke  | 0 | 0 | 0 | 478 | 534 | 534 | 534 | 515 | 13089 | 276 | 735843 | GSM850823 | Kasumi-1 (AML    | 1 | 12817 |
| dms.bed | codex | RUNX1   | Blood | Acute Myeloid Leuke  | 0 | 0 | 0 | 478 | 534 | 534 | 534 | 515 | 13499 | 276 | 735433 | GSM850824 | Kasumi-1 (AML    | 1 | 17787 |
| dms.bed | codex | RUNX1T1 | Blood | Acute Myeloid Leuke  | 0 | 0 | 0 | 478 | 534 | 534 | 534 | 515 | 890   | 276 | 748042 | GSM850826 | Blast cells from | 1 | 1125  |
| dms.bed | codex | POLR2A  | ESC   | Embryonic Stem Cell  | 0 | 0 | 0 | 478 | 534 | 534 | 534 | 515 | 49089 | 276 | 699843 | GSM897115 | codex Embryor    | 1 | 12277 |
| dms.bed | codex | SMAD3   | ESC   | Embryonic Stem Cell  | 0 | 0 | 0 | 478 | 534 | 534 | 534 | 515 | 1021  | 276 | 747911 | GSM897117 | codex Embryor    | 1 | 947   |
| dms.bed | codex | SMC3    | ESC   | Embryonic Stem Cell  | 0 | 0 | 0 | 478 | 534 | 534 | 534 | 515 | 3770  | 276 | 745162 | GSM897119 | codex Embryor    | 1 | 4240  |
| dms.bed | codex | SMC1A   | ESC   | Embryonic Stem Cell  | 0 | 0 | 0 | 478 | 534 | 534 | 534 | 515 | 5434  | 276 | 743498 | GSM897120 | codex Embryor    | 1 | 4560  |
| dms.bed | codex | BCL6    | Blood | B-Cells              | 0 | 0 | 0 | 478 | 534 | 534 | 534 | 515 | 52428 | 276 | 696504 | GSM898060 | Cell line: Germ  | 1 | 23912 |
| dms.bed | codex | NCOR2   | Blood | B-Cells              | 0 | 0 | 0 | 478 | 534 | 534 | 534 | 515 | 6236  | 276 | 742696 | GSM898062 | Cell line: Germ  | 1 | 5917  |

|         |             |         |              |                       |   |   |   |     |     |     |     |     |        |     |        |                            |   |       |
|---------|-------------|---------|--------------|-----------------------|---|---|---|-----|-----|-----|-----|-----|--------|-----|--------|----------------------------|---|-------|
| dms.bed | codex       | TAL1    | Blood        | Erythroblast          | 0 | 0 | 0 | 478 | 534 | 534 | 534 | 515 | 101    | 276 | 748831 | GSM908054_Proerythroblas   | 1 | 584   |
| dms.bed | codex       | TAL1    | Blood        | Erythroblast          | 0 | 0 | 0 | 478 | 534 | 534 | 534 | 515 | 369    | 276 | 748563 | GSM908055_Proerythroblas   | 1 | 1137  |
| dms.bed | codex       | NFE2    | Blood        | Erythroblast          | 0 | 0 | 0 | 478 | 534 | 534 | 534 | 515 | 166    | 276 | 748766 | GSM908059_Proerythroblas   | 1 | 404   |
| dms.bed | codex       | POLR2A  | Blood        | Erythroblast          | 0 | 0 | 0 | 478 | 534 | 534 | 534 | 515 | 726    | 276 | 748206 | GSM908069_Proerythroblas   | 1 | 235   |
| dms.bed | codex       | POLR2A  | ESC          | Embryonic Stem Cell   | 0 | 0 | 0 | 478 | 534 | 534 | 534 | 515 | 71791  | 276 | 677141 | GSM937544_codex Embryor    | 1 | 14514 |
| dms.bed | codex       | POLR2A  | ESC          | Embryonic Stem Cell   | 0 | 0 | 0 | 478 | 534 | 534 | 534 | 515 | 75452  | 276 | 673480 | GSM937545_codex Embryor    | 1 | 15798 |
| dms.bed | codex       | KMT2A   | Blood        | Leukaemia cell        | 0 | 0 | 0 | 478 | 534 | 534 | 534 | 515 | 12612  | 276 | 736320 | GSM941543_Adult acute B c  | 1 | 3495  |
| dms.bed | codex       | AFF1    | Blood        | Leukaemia cell        | 0 | 0 | 0 | 478 | 534 | 534 | 534 | 515 | 2154   | 276 | 746778 | GSM941544_Adult acute B c  | 1 | 5219  |
| dms.bed | codex       | ZNF143  | Kidney       | Embryonic kidney cel  | 0 | 0 | 0 | 478 | 534 | 534 | 534 | 515 | 7616   | 276 | 741316 | GSM959048_ChIP-seq_ZNF1    | 1 | 2276  |
| dms.bed | codex       | ZNF143  | Blood        | T-cell acute lymphobl | 0 | 0 | 0 | 478 | 534 | 534 | 534 | 515 | 7656   | 276 | 741276 | GSM959049_ChIP-seq_ZNF1    | 1 | 1901  |
| dms.bed | codex       | ZNF143  | Kidney       | Embryonic kidney cel  | 0 | 0 | 0 | 478 | 534 | 534 | 534 | 515 | 5227   | 276 | 743705 | GSM959050_ChIP-seq_ZNF1    | 1 | 4353  |
| dms.bed | codex       | ZNF143  | Kidney       | Embryonic kidney cel  | 0 | 0 | 0 | 478 | 534 | 534 | 534 | 515 | 11289  | 276 | 737643 | GSM959051_ChIP-seq_ZNF1    | 1 | 6459  |
| dms.bed | codex       | ZNF143  | Kidney       | Embryonic kidney cel  | 0 | 0 | 0 | 478 | 534 | 534 | 534 | 515 | 9745   | 276 | 739187 | GSM959052_ChIP-seq_ZNF7    | 1 | 7031  |
| dms.bed | codex       | GATA1   | Blood        | Erythroblast          | 0 | 0 | 0 | 478 | 534 | 534 | 534 | 515 | 7683   | 276 | 741249 | GSM970257_Proerythroblas   | 1 | 10094 |
| dms.bed | codex       | POLR2A  | Blood        | Erythroblast          | 0 | 0 | 0 | 478 | 534 | 534 | 534 | 515 | 70563  | 276 | 678369 | GSM970260_Proerythroblas   | 1 | 25986 |
| dms.bed | codex       | IRF2    | Blood        | Erythroblast          | 0 | 0 | 0 | 478 | 534 | 534 | 534 | 515 | 1571   | 276 | 747361 | GSM970261_Proerythroblas   | 1 | 1789  |
| dms.bed | codex       | TP53    | ESC          | Embryonic Stem Cell   | 0 | 0 | 0 | 478 | 534 | 534 | 534 | 515 | 5964   | 276 | 742968 | GSM981237_codex Embryor    | 1 | 3420  |
| dms.bed | encode_tfbs | CTCF    | Blood        | Dnd41                 | 0 | 0 | 0 | 478 | 534 | 534 | 534 | 515 | 28059  | 276 | 720873 | wgEncodeAv ChIP Dnd41 CT   | 1 | 50070 |
| dms.bed | encode_tfbs | EZH2    | Blood        | Dnd41                 | 0 | 0 | 0 | 478 | 534 | 534 | 534 | 515 | 7424   | 276 | 741508 | wgEncodeAv ChIP Dnd41 EZI  | 1 | 1732  |
| dms.bed | encode_tfbs | EZH2    | Blood        | GM12878               | 0 | 0 | 0 | 478 | 534 | 534 | 534 | 515 | 3127   | 276 | 745805 | wgEncodeAv ChIP GM12878    | 1 | 2472  |
| dms.bed | encode_tfbs | CHD1    | ESC          | H1-hESC               | 0 | 0 | 0 | 478 | 534 | 534 | 534 | 515 | 23090  | 276 | 725842 | wgEncodeAv ChIP H1-hESC C  | 1 | 7247  |
| dms.bed | encode_tfbs | EZH2    | ESC          | H1-hESC               | 0 | 0 | 0 | 478 | 534 | 534 | 534 | 515 | 39533  | 276 | 709399 | wgEncodeAv ChIP H1-hESC E  | 1 | 6370  |
| dms.bed | encode_tfbs | JARID1A | ESC          | H1-hESC               | 0 | 0 | 0 | 478 | 534 | 534 | 534 | 515 | 6418   | 276 | 742514 | wgEncodeAv ChIP H1-hESC J  | 1 | 1625  |
| dms.bed | encode_tfbs | RBBP5   | ESC          | H1-hESC               | 0 | 0 | 0 | 478 | 534 | 534 | 534 | 515 | 97540  | 276 | 651392 | wgEncodeAv ChIP H1-hESC F  | 1 | 16151 |
| dms.bed | encode_tfbs | EZH2    | Cervix       | HeLa-S3               | 0 | 0 | 0 | 478 | 534 | 534 | 534 | 515 | 714    | 276 | 748218 | wgEncodeAv ChIP HeLa-S3 E  | 1 | 1818  |
| dms.bed | encode_tfbs | Pol2(b) | Cervix       | HeLa-S3               | 0 | 0 | 0 | 478 | 534 | 534 | 534 | 515 | 10050  | 276 | 738882 | wgEncodeAv ChIP HeLa-S3 P  | 1 | 3149  |
| dms.bed | encode_tfbs | EZH2    | Liver        | HepG2                 | 0 | 0 | 0 | 478 | 534 | 534 | 534 | 515 | 13093  | 276 | 735839 | wgEncodeAv ChIP HepG2 EZ   | 1 | 3286  |
| dms.bed | encode_tfbs | EZH2    | Breast       | HMEC                  | 0 | 0 | 0 | 478 | 534 | 534 | 534 | 515 | 15807  | 276 | 733125 | wgEncodeAv ChIP HMEC EZH   | 1 | 4626  |
| dms.bed | encode_tfbs | CTCF    | Muscle       | HSMM                  | 0 | 0 | 0 | 478 | 534 | 534 | 534 | 515 | 22764  | 276 | 726168 | wgEncodeAv ChIP HSMM CT    | 1 | 50924 |
| dms.bed | encode_tfbs | EZH2    | Muscle       | HSMM                  | 0 | 0 | 0 | 478 | 534 | 534 | 534 | 515 | 5858   | 276 | 743074 | wgEncodeAv ChIP HSMM EZ    | 1 | 1540  |
| dms.bed | encode_tfbs | CTCF    | Muscle       | HSMMtube              | 0 | 0 | 0 | 478 | 534 | 534 | 534 | 515 | 25939  | 276 | 722993 | wgEncodeAv ChIP HSMMtube   | 1 | 47949 |
| dms.bed | encode_tfbs | EZH2    | Muscle       | HSMMtube              | 0 | 0 | 0 | 478 | 534 | 534 | 534 | 515 | 14832  | 276 | 734100 | wgEncodeAv ChIP HSMMtube   | 1 | 2700  |
| dms.bed | encode_tfbs | CTCF    | Blood vessel | HUVEC                 | 0 | 0 | 0 | 478 | 534 | 534 | 534 | 515 | 28288  | 276 | 720644 | wgEncodeAv ChIP HUVEC CT   | 1 | 37412 |
| dms.bed | encode_tfbs | EZH2    | Blood vessel | HUVEC                 | 0 | 0 | 0 | 478 | 534 | 534 | 534 | 515 | 44338  | 276 | 704594 | wgEncodeAv ChIP HUVEC EZ   | 1 | 6234  |
| dms.bed | encode_tfbs | Pol2(b) | Blood vessel | HUVEC                 | 0 | 0 | 0 | 478 | 534 | 534 | 534 | 515 | 21432  | 276 | 727500 | wgEncodeAv ChIP HUVEC Po   | 1 | 5298  |
| dms.bed | encode_tfbs | CHD1    | Blood        | K562                  | 0 | 0 | 0 | 478 | 534 | 534 | 534 | 515 | 35872  | 276 | 713060 | wgEncodeAv ChIP K562 CHD   | 1 | 9350  |
| dms.bed | encode_tfbs | EZH2    | Blood        | K562                  | 0 | 0 | 0 | 478 | 534 | 534 | 534 | 515 | 1670   | 276 | 747262 | wgEncodeAv ChIP K562 EZH   | 1 | 1685  |
| dms.bed | encode_tfbs | HDAC1   | Blood        | K562                  | 0 | 0 | 0 | 478 | 534 | 534 | 534 | 515 | 55352  | 276 | 693580 | wgEncodeAv ChIP K562 HDA   | 1 | 11833 |
| dms.bed | encode_tfbs | HDAC2   | Blood        | K562                  | 0 | 0 | 0 | 478 | 534 | 534 | 534 | 515 | 15020  | 276 | 733912 | wgEncodeAv ChIP K562 HDA   | 1 | 5247  |
| dms.bed | encode_tfbs | HDAC6   | Blood        | K562                  | 0 | 0 | 0 | 478 | 534 | 534 | 534 | 515 | 2691   | 276 | 746241 | wgEncodeAv ChIP K562 HDA   | 1 | 1114  |
| dms.bed | encode_tfbs | p300    | Blood        | K562                  | 0 | 0 | 0 | 478 | 534 | 534 | 534 | 515 | 1410   | 276 | 747522 | wgEncodeAv ChIP K562 p300  | 1 | 2674  |
| dms.bed | encode_tfbs | PHF8    | Blood        | K562                  | 0 | 0 | 0 | 478 | 534 | 534 | 534 | 515 | 112486 | 276 | 636446 | wgEncodeAv ChIP K562 PHF8  | 1 | 22302 |
| dms.bed | encode_tfbs | PLU1    | Blood        | K562                  | 0 | 0 | 0 | 478 | 534 | 534 | 534 | 515 | 69985  | 276 | 678947 | wgEncodeAv ChIP K562 PLU1  | 1 | 15520 |
| dms.bed | encode_tfbs | Pol2(b) | Blood        | K562                  | 0 | 0 | 0 | 478 | 534 | 534 | 534 | 515 | 42861  | 276 | 706071 | wgEncodeAv ChIP K562 Pol2  | 1 | 11424 |
| dms.bed | encode_tfbs | RBBP5   | Blood        | K562                  | 0 | 0 | 0 | 478 | 534 | 534 | 534 | 515 | 76962  | 276 | 671970 | wgEncodeAv ChIP K562 RBBI  | 1 | 14258 |
| dms.bed | encode_tfbs | SAP30   | Blood        | K562                  | 0 | 0 | 0 | 478 | 534 | 534 | 534 | 515 | 52151  | 276 | 696781 | wgEncodeAv ChIP K562 SAP30 | 1 | 9753  |
| dms.bed | encode_tfbs | CTCF    | Brain        | NH-A                  | 0 | 0 | 0 | 478 | 534 | 534 | 534 | 515 | 18813  | 276 | 730119 | wgEncodeAv ChIP NH-A CTC   | 1 | 38474 |
| dms.bed | encode_tfbs | EZH2    | Brain        | NH-A                  | 0 | 0 | 0 | 478 | 534 | 534 | 534 | 515 | 40938  | 276 | 707994 | wgEncodeAv ChIP NH-A EZH   | 1 | 6493  |
| dms.bed | encode_tfbs | CTCF    | Skin         | NHDF-Ad               | 0 | 0 | 0 | 478 | 534 | 534 | 534 | 515 | 23565  | 276 | 725367 | wgEncodeAv ChIP NHDF-Ad    | 1 | 48995 |
| dms.bed | encode_tfbs | EZH2    | Skin         | NHDF-Ad               | 0 | 0 | 0 | 478 | 534 | 534 | 534 | 515 | 35851  | 276 | 713081 | wgEncodeAv ChIP NHDF-Ad    | 1 | 5739  |
| dms.bed | encode_tfbs | EZH2    | Skin         | NHEK                  | 0 | 0 | 0 | 478 | 534 | 534 | 534 | 515 | 31931  | 276 | 717001 | wgEncodeAv ChIP NHEK EZH   | 1 | 7978  |
| dms.bed | encode_tfbs | Pol2(b) | Skin         | NHEK                  | 0 | 0 | 0 | 478 | 534 | 534 | 534 | 515 | 13251  | 276 | 735681 | wgEncodeAv ChIP NHEK Pol2  | 1 | 5784  |
| dms.bed | encode_tfbs | EZH2    | Lung         | NHLF                  | 0 | 0 | 0 | 478 | 534 | 534 | 534 | 515 | 29188  | 276 | 719744 | wgEncodeAv ChIP NHLF EZH   | 1 | 7030  |
| dms.bed | encode_tfbs | ATF3    | Lung         | A549                  | 0 | 0 | 0 | 478 | 534 | 534 | 534 | 515 | 8387   | 276 | 740545 | wgEncodeAv ChIP A549 ATF3  | 1 | 6580  |
| dms.bed | encode_tfbs | BCL3    | Lung         | A549                  | 0 | 0 | 0 | 478 | 534 | 534 | 534 | 515 | 10733  | 276 | 738199 | wgEncodeAv ChIP A549 BCL3  | 1 | 7740  |
| dms.bed | encode_tfbs | CTCF    | Lung         | A549                  | 0 | 0 | 0 | 478 | 534 | 534 | 534 | 515 | 13795  | 276 | 735137 | wgEncodeAv ChIP A549 CTCI  | 1 | 40841 |
| dms.bed | encode_tfbs | CTCF    | Lung         | A549                  | 0 | 0 | 0 | 478 | 534 | 534 | 534 | 515 | 15487  | 276 | 733445 | wgEncodeAv ChIP A549 CTCI  | 1 | 38133 |

|         |             |           |        |         |   |   |   |     |     |     |     |     |       |     |        |            |                       |   |       |
|---------|-------------|-----------|--------|---------|---|---|---|-----|-----|-----|-----|-----|-------|-----|--------|------------|-----------------------|---|-------|
| dms.bed | encode_tfbs | FOSL2     | Lung   | A549    | 0 | 0 | 0 | 478 | 534 | 534 | 534 | 515 | 9378  | 276 | 739554 | wgEncodeAv | ChIP A549 FOSL2       | 1 | 28756 |
| dms.bed | encode_tfbs | FOXA1     | Lung   | A549    | 0 | 0 | 0 | 478 | 534 | 534 | 534 | 515 | 355   | 276 | 748577 | wgEncodeAv | ChIP A549 FOXA1       | 1 | 7695  |
| dms.bed | encode_tfbs | GR        | Lung   | A549    | 0 | 0 | 0 | 478 | 534 | 534 | 534 | 515 | 365   | 276 | 748567 | wgEncodeAv | ChIP A549 GR          | 1 | 1009  |
| dms.bed | encode_tfbs | NRSF      | Lung   | A549    | 0 | 0 | 0 | 478 | 534 | 534 | 534 | 515 | 23615 | 276 | 725317 | wgEncodeAv | ChIP A549 NRSF        | 1 | 11970 |
| dms.bed | encode_tfbs | Sin3Ak-20 | Lung   | A549    | 0 | 0 | 0 | 478 | 534 | 534 | 534 | 515 | 17380 | 276 | 731552 | wgEncodeAv | ChIP A549 Sin3        | 1 | 6024  |
| dms.bed | encode_tfbs | TAF1      | Lung   | A549    | 0 | 0 | 0 | 478 | 534 | 534 | 534 | 515 | 41046 | 276 | 707886 | wgEncodeAv | ChIP A549 TAF1        | 1 | 9984  |
| dms.bed | encode_tfbs | USF-1     | Lung   | A549    | 0 | 0 | 0 | 478 | 534 | 534 | 534 | 515 | 11929 | 276 | 737003 | wgEncodeAv | ChIP A549 USF-1       | 1 | 11980 |
| dms.bed | encode_tfbs | USF-1     | Lung   | A549    | 0 | 0 | 0 | 478 | 534 | 534 | 534 | 515 | 14356 | 276 | 734576 | wgEncodeAv | ChIP A549 USF-1       | 1 | 11932 |
| dms.bed | encode_tfbs | USF-1     | Lung   | A549    | 0 | 0 | 0 | 478 | 534 | 534 | 534 | 515 | 11839 | 276 | 737093 | wgEncodeAv | ChIP A549 USF-1       | 1 | 8004  |
| dms.bed | encode_tfbs | ZBTB33    | Lung   | A549    | 0 | 0 | 0 | 478 | 534 | 534 | 534 | 515 | 15358 | 276 | 733574 | wgEncodeAv | ChIP A549 ZBTB33      | 1 | 7152  |
| dms.bed | encode_tfbs | CTCF      | Uterus | ECC-1   | 0 | 0 | 0 | 478 | 534 | 534 | 534 | 515 | 10655 | 276 | 738277 | wgEncodeAv | ChIP ECC-1 CTCF       | 1 | 23192 |
| dms.bed | encode_tfbs | ERalpha_a | Uterus | ECC-1   | 0 | 0 | 0 | 478 | 534 | 534 | 534 | 515 | 1783  | 276 | 747149 | wgEncodeAv | ChIP ECC-1 ERalpha    | 1 | 4260  |
| dms.bed | encode_tfbs | FOXA1     | Uterus | ECC-1   | 0 | 0 | 0 | 478 | 534 | 534 | 534 | 515 | 2136  | 276 | 746796 | wgEncodeAv | ChIP ECC-1 FOXA1      | 1 | 5892  |
| dms.bed | encode_tfbs | ATF2      | Blood  | GM12878 | 0 | 0 | 0 | 478 | 534 | 534 | 534 | 515 | 22151 | 276 | 726781 | wgEncodeAv | ChIP GM12878 ATF2     | 1 | 23467 |
| dms.bed | encode_tfbs | ATF3      | Blood  | GM12878 | 0 | 0 | 0 | 478 | 534 | 534 | 534 | 515 | 3644  | 276 | 745288 | wgEncodeAv | ChIP GM12878 ATF3     | 1 | 1677  |
| dms.bed | encode_tfbs | BATF      | Blood  | GM12878 | 0 | 0 | 0 | 478 | 534 | 534 | 534 | 515 | 3797  | 276 | 745135 | wgEncodeAv | ChIP GM12878 BATF     | 1 | 32427 |
| dms.bed | encode_tfbs | BCL11A    | Blood  | GM12878 | 0 | 0 | 0 | 478 | 534 | 534 | 534 | 515 | 4385  | 276 | 744547 | wgEncodeAv | ChIP GM12878 BCL11A   | 1 | 17876 |
| dms.bed | encode_tfbs | BCL3      | Blood  | GM12878 | 0 | 0 | 0 | 478 | 534 | 534 | 534 | 515 | 11619 | 276 | 737313 | wgEncodeAv | ChIP GM12878 BCL3     | 1 | 15455 |
| dms.bed | encode_tfbs | BCLAF1    | Blood  | GM12878 | 0 | 0 | 0 | 478 | 534 | 534 | 534 | 515 | 15042 | 276 | 733890 | wgEncodeAv | ChIP GM12878 BCLAF1   | 1 | 6114  |
| dms.bed | encode_tfbs | CEBPB     | Blood  | GM12878 | 0 | 0 | 0 | 478 | 534 | 534 | 534 | 515 | 4896  | 276 | 744036 | wgEncodeAv | ChIP GM12878 CEBPB    | 1 | 5786  |
| dms.bed | encode_tfbs | EBF1      | Blood  | GM12878 | 0 | 0 | 0 | 478 | 534 | 534 | 534 | 515 | 21614 | 276 | 727318 | wgEncodeAv | ChIP GM12878 EBF1     | 1 | 36140 |
| dms.bed | encode_tfbs | Egr-1     | Blood  | GM12878 | 0 | 0 | 0 | 478 | 534 | 534 | 534 | 515 | 35027 | 276 | 713905 | wgEncodeAv | ChIP GM12878 Egr-1    | 1 | 16331 |
| dms.bed | encode_tfbs | ETS1      | Blood  | GM12878 | 0 | 0 | 0 | 478 | 534 | 534 | 534 | 515 | 10912 | 276 | 738020 | wgEncodeAv | ChIP GM12878 ETS1     | 1 | 4120  |
| dms.bed | encode_tfbs | FOXM1     | Blood  | GM12878 | 0 | 0 | 0 | 478 | 534 | 534 | 534 | 515 | 28891 | 276 | 720041 | wgEncodeAv | ChIP GM12878 FOXM1    | 1 | 22926 |
| dms.bed | encode_tfbs | GABP      | Blood  | GM12878 | 0 | 0 | 0 | 478 | 534 | 534 | 534 | 515 | 24267 | 276 | 724665 | wgEncodeAv | ChIP GM12878 GABP     | 1 | 6566  |
| dms.bed | encode_tfbs | IRF4      | Blood  | GM12878 | 0 | 0 | 0 | 478 | 534 | 534 | 534 | 515 | 9182  | 276 | 739750 | wgEncodeAv | ChIP GM12878 IRF4     | 1 | 17771 |
| dms.bed | encode_tfbs | MEF2A     | Blood  | GM12878 | 0 | 0 | 0 | 478 | 534 | 534 | 534 | 515 | 10202 | 276 | 738730 | wgEncodeAv | ChIP GM12878 MEF2A    | 1 | 17605 |
| dms.bed | encode_tfbs | MEF2C     | Blood  | GM12878 | 0 | 0 | 0 | 478 | 534 | 534 | 534 | 515 | 7154  | 276 | 741778 | wgEncodeAv | ChIP GM12878 MEF2C    | 1 | 9216  |
| dms.bed | encode_tfbs | MTA3      | Blood  | GM12878 | 0 | 0 | 0 | 478 | 534 | 534 | 534 | 515 | 16432 | 276 | 732500 | wgEncodeAv | ChIP GM12878 MTA3     | 1 | 12032 |
| dms.bed | encode_tfbs | NFATC1    | Blood  | GM12878 | 0 | 0 | 0 | 478 | 534 | 534 | 534 | 515 | 8928  | 276 | 740004 | wgEncodeAv | ChIP GM12878 NFATC1   | 1 | 10812 |
| dms.bed | encode_tfbs | NFIC      | Blood  | GM12878 | 0 | 0 | 0 | 478 | 534 | 534 | 534 | 515 | 19655 | 276 | 729277 | wgEncodeAv | ChIP GM12878 NFIC     | 1 | 29060 |
| dms.bed | encode_tfbs | NRSF      | Blood  | GM12878 | 0 | 0 | 0 | 478 | 534 | 534 | 534 | 515 | 13470 | 276 | 735462 | wgEncodeAv | ChIP GM12878 NRSF     | 1 | 6906  |
| dms.bed | encode_tfbs | p300      | Blood  | GM12878 | 0 | 0 | 0 | 478 | 534 | 534 | 534 | 515 | 3725  | 276 | 745207 | wgEncodeAv | ChIP GM12878 p300     | 1 | 5168  |
| dms.bed | encode_tfbs | PAX5-C20  | Blood  | GM12878 | 0 | 0 | 0 | 478 | 534 | 534 | 534 | 515 | 28204 | 276 | 720728 | wgEncodeAv | ChIP GM12878 PAX5-C20 | 1 | 25342 |
| dms.bed | encode_tfbs | PAX5-N19  | Blood  | GM12878 | 0 | 0 | 0 | 478 | 534 | 534 | 534 | 515 | 21947 | 276 | 726985 | wgEncodeAv | ChIP GM12878 PAX5-N19 | 1 | 19740 |
| dms.bed | encode_tfbs | Pbx3      | Blood  | GM12878 | 0 | 0 | 0 | 478 | 534 | 534 | 534 | 515 | 9572  | 276 | 739360 | wgEncodeAv | ChIP GM12878 Pbx3     | 1 | 9941  |
| dms.bed | encode_tfbs | PML       | Blood  | GM12878 | 0 | 0 | 0 | 478 | 534 | 534 | 534 | 515 | 51547 | 276 | 697385 | wgEncodeAv | ChIP GM12878 PML      | 1 | 16678 |
| dms.bed | encode_tfbs | Pol2-4H8  | Blood  | GM12878 | 0 | 0 | 0 | 478 | 534 | 534 | 534 | 515 | 73928 | 276 | 675004 | wgEncodeAv | ChIP GM12878 Pol2-4H8 | 1 | 19234 |
| dms.bed | encode_tfbs | POU2F2    | Blood  | GM12878 | 0 | 0 | 0 | 478 | 534 | 534 | 534 | 515 | 30704 | 276 | 718228 | wgEncodeAv | ChIP GM12878 POU2F2   | 1 | 22891 |
| dms.bed | encode_tfbs | PU.1      | Blood  | GM12878 | 0 | 0 | 0 | 478 | 534 | 534 | 534 | 515 | 13935 | 276 | 734997 | wgEncodeAv | ChIP GM12878 PU.1     | 1 | 42938 |
| dms.bed | encode_tfbs | RXRA      | Blood  | GM12878 | 0 | 0 | 0 | 478 | 534 | 534 | 534 | 515 | 2470  | 276 | 746462 | wgEncodeAv | ChIP GM12878 RXRA     | 1 | 1704  |
| dms.bed | encode_tfbs | SIX5      | Blood  | GM12878 | 0 | 0 | 0 | 478 | 534 | 534 | 534 | 515 | 13195 | 276 | 735737 | wgEncodeAv | ChIP GM12878 SIX5     | 1 | 4839  |
| dms.bed | encode_tfbs | SP1       | Blood  | GM12878 | 0 | 0 | 0 | 478 | 534 | 534 | 534 | 515 | 32997 | 276 | 715935 | wgEncodeAv | ChIP GM12878 SP1      | 1 | 18248 |
| dms.bed | encode_tfbs | SRF       | Blood  | GM12878 | 0 | 0 | 0 | 478 | 534 | 534 | 534 | 515 | 14857 | 276 | 734075 | wgEncodeAv | ChIP GM12878 SRF      | 1 | 8544  |
| dms.bed | encode_tfbs | STAT5A    | Blood  | GM12878 | 0 | 0 | 0 | 478 | 534 | 534 | 534 | 515 | 12479 | 276 | 736453 | wgEncodeAv | ChIP GM12878 STAT5A   | 1 | 7423  |
| dms.bed | encode_tfbs | TAF1      | Blood  | GM12878 | 0 | 0 | 0 | 478 | 534 | 534 | 534 | 515 | 42203 | 276 | 706729 | wgEncodeAv | ChIP GM12878 TAF1     | 1 | 14278 |
| dms.bed | encode_tfbs | TCF3      | Blood  | GM12878 | 0 | 0 | 0 | 478 | 534 | 534 | 534 | 515 | 26500 | 276 | 722432 | wgEncodeAv | ChIP GM12878 TCF3     | 1 | 16021 |
| dms.bed | encode_tfbs | USF-1     | Blood  | GM12878 | 0 | 0 | 0 | 478 | 534 | 534 | 534 | 515 | 17405 | 276 | 731527 | wgEncodeAv | ChIP GM12878 USF-1    | 1 | 9778  |
| dms.bed | encode_tfbs | YY1       | Blood  | GM12878 | 0 | 0 | 0 | 478 | 534 | 534 | 534 | 515 | 51971 | 276 | 696961 | wgEncodeAv | ChIP GM12878 YY1      | 1 | 30994 |
| dms.bed | encode_tfbs | ZBTB33    | Blood  | GM12878 | 0 | 0 | 0 | 478 | 534 | 534 | 534 | 515 | 5832  | 276 | 743100 | wgEncodeAv | ChIP GM12878 ZBTB33   | 1 | 2144  |
| dms.bed | encode_tfbs | PAX5-C20  | Blood  | GM12891 | 0 | 0 | 0 | 478 | 534 | 534 | 534 | 515 | 3378  | 276 | 745554 | wgEncodeAv | ChIP GM12891 PAX5-C20 | 1 | 3156  |
| dms.bed | encode_tfbs | Pol2-4H8  | Blood  | GM12891 | 0 | 0 | 0 | 478 | 534 | 534 | 534 | 515 | 46596 | 276 | 702336 | wgEncodeAv | ChIP GM12891 Pol2-4H8 | 1 | 16236 |
| dms.bed | encode_tfbs | Pol2      | Blood  | GM12891 | 0 | 0 | 0 | 478 | 534 | 534 | 534 | 515 | 48533 | 276 | 700399 | wgEncodeAv | ChIP GM12891 Pol2     | 1 | 16585 |
| dms.bed | encode_tfbs | POU2F2    | Blood  | GM12891 | 0 | 0 | 0 | 478 | 534 | 534 | 534 | 515 | 21378 | 276 | 727554 | wgEncodeAv | ChIP GM12891 POU2F2   | 1 | 14630 |
| dms.bed | encode_tfbs | PU.1      | Blood  | GM12891 | 0 | 0 | 0 | 478 | 534 | 534 | 534 | 515 | 13266 | 276 | 735666 | wgEncodeAv | ChIP GM12891 PU.1     | 1 | 48830 |
| dms.bed | encode_tfbs | TAF1      | Blood  | GM12891 | 0 | 0 | 0 | 478 | 534 | 534 | 534 | 515 | 39826 | 276 | 709106 | wgEncodeAv | ChIP GM12891 TAF1     | 1 | 11883 |
| dms.bed | encode_tfbs | YY1       | Blood  | GM12891 | 0 | 0 | 0 | 478 | 534 | 534 | 534 | 515 | 36175 | 276 | 712757 | wgEncodeAv | ChIP GM12891 YY1      | 1 | 13593 |

|         |             |           |              |         |   |   |   |     |     |     |     |     |        |     |        |            |      |         |        |       |       |
|---------|-------------|-----------|--------------|---------|---|---|---|-----|-----|-----|-----|-----|--------|-----|--------|------------|------|---------|--------|-------|-------|
| dms.bed | encode_tfbs | PAX5-C20  | Blood        | GM12892 | 0 | 0 | 0 | 478 | 534 | 534 | 534 | 515 | 32046  | 276 | 716886 | wgEncodeAv | ChIP | GM12892 | 1      | 10300 |       |
| dms.bed | encode_tfbs | Pol2-4H8  | Blood        | GM12892 | 0 | 0 | 0 | 478 | 534 | 534 | 534 | 515 | 49812  | 276 | 699120 | wgEncodeAv | ChIP | GM12892 | 1      | 17407 |       |
| dms.bed | encode_tfbs | Pol2      | Blood        | GM12892 | 0 | 0 | 0 | 478 | 534 | 534 | 534 | 515 | 71314  | 276 | 677618 | wgEncodeAv | ChIP | GM12892 | 1      | 20075 |       |
| dms.bed | encode_tfbs | TAF1      | Blood        | GM12892 | 0 | 0 | 0 | 478 | 534 | 534 | 534 | 515 | 34654  | 276 | 714278 | wgEncodeAv | ChIP | GM12892 | 1      | 9442  |       |
| dms.bed | encode_tfbs | YY1       | Blood        | GM12892 | 0 | 0 | 0 | 478 | 534 | 534 | 534 | 515 | 36075  | 276 | 712857 | wgEncodeAv | ChIP | GM12892 | 1      | 15951 |       |
| dms.bed | encode_tfbs | ATF2      | ESC          | H1-hESC | 0 | 0 | 0 | 478 | 534 | 534 | 534 | 515 | 15564  | 276 | 733368 | wgEncodeAv | ChIP | H1-hESC | A      | 1     | 5998  |
| dms.bed | encode_tfbs | ATF3      | ESC          | H1-hESC | 0 | 0 | 0 | 478 | 534 | 534 | 534 | 515 | 10001  | 276 | 738931 | wgEncodeAv | ChIP | H1-hESC | A      | 1     | 4808  |
| dms.bed | encode_tfbs | BCL11A    | ESC          | H1-hESC | 0 | 0 | 0 | 478 | 534 | 534 | 534 | 515 | 309    | 276 | 748623 | wgEncodeAv | ChIP | H1-hESC | E      | 1     | 2518  |
| dms.bed | encode_tfbs | FOSL1     | ESC          | H1-hESC | 0 | 0 | 0 | 478 | 534 | 534 | 534 | 515 | 2718   | 276 | 746214 | wgEncodeAv | ChIP | H1-hESC | F      | 1     | 1113  |
| dms.bed | encode_tfbs | GABP      | ESC          | H1-hESC | 0 | 0 | 0 | 478 | 534 | 534 | 534 | 515 | 17251  | 276 | 731681 | wgEncodeAv | ChIP | H1-hESC | G      | 1     | 5653  |
| dms.bed | encode_tfbs | HDAC2     | ESC          | H1-hESC | 0 | 0 | 0 | 478 | 534 | 534 | 534 | 515 | 8952   | 276 | 739980 | wgEncodeAv | ChIP | H1-hESC | H      | 1     | 5644  |
| dms.bed | encode_tfbs | JunD      | ESC          | H1-hESC | 0 | 0 | 0 | 478 | 534 | 534 | 534 | 515 | 15096  | 276 | 733836 | wgEncodeAv | ChIP | H1-hESC | J      | 1     | 8447  |
| dms.bed | encode_tfbs | NANOG     | ESC          | H1-hESC | 0 | 0 | 0 | 478 | 534 | 534 | 534 | 515 | 3203   | 276 | 745729 | wgEncodeAv | ChIP | H1-hESC | M      | 1     | 5473  |
| dms.bed | encode_tfbs | NRSF      | ESC          | H1-hESC | 0 | 0 | 0 | 478 | 534 | 534 | 534 | 515 | 7606   | 276 | 741326 | wgEncodeAv | ChIP | H1-hESC | N      | 1     | 13286 |
| dms.bed | encode_tfbs | p300      | ESC          | H1-hESC | 0 | 0 | 0 | 478 | 534 | 534 | 534 | 515 | 16327  | 276 | 732605 | wgEncodeAv | ChIP | H1-hESC | P      | 1     | 8934  |
| dms.bed | encode_tfbs | Pol2-4H8  | ESC          | H1-hESC | 0 | 0 | 0 | 478 | 534 | 534 | 534 | 515 | 53779  | 276 | 695153 | wgEncodeAv | ChIP | H1-hESC | F      | 1     | 21342 |
| dms.bed | encode_tfbs | Pol2      | ESC          | H1-hESC | 0 | 0 | 0 | 478 | 534 | 534 | 534 | 515 | 84073  | 276 | 664859 | wgEncodeAv | ChIP | H1-hESC | F      | 1     | 20317 |
| dms.bed | encode_tfbs | POU5F1    | ESC          | H1-hESC | 0 | 0 | 0 | 478 | 534 | 534 | 534 | 515 | 841    | 276 | 748091 | wgEncodeAv | ChIP | H1-hESC | F      | 1     | 3997  |
| dms.bed | encode_tfbs | RXRA      | ESC          | H1-hESC | 0 | 0 | 0 | 478 | 534 | 534 | 534 | 515 | 1259   | 276 | 747673 | wgEncodeAv | ChIP | H1-hESC | F      | 1     | 1306  |
| dms.bed | encode_tfbs | Sin3Ak-20 | ESC          | H1-hESC | 0 | 0 | 0 | 478 | 534 | 534 | 534 | 515 | 23827  | 276 | 725105 | wgEncodeAv | ChIP | H1-hESC | S      | 1     | 8977  |
| dms.bed | encode_tfbs | SIX5      | ESC          | H1-hESC | 0 | 0 | 0 | 478 | 534 | 534 | 534 | 515 | 5870   | 276 | 743062 | wgEncodeAv | ChIP | H1-hESC | S      | 1     | 3425  |
| dms.bed | encode_tfbs | SP1       | ESC          | H1-hESC | 0 | 0 | 0 | 478 | 534 | 534 | 534 | 515 | 24488  | 276 | 724444 | wgEncodeAv | ChIP | H1-hESC | S      | 1     | 15110 |
| dms.bed | encode_tfbs | SP2       | ESC          | H1-hESC | 0 | 0 | 0 | 478 | 534 | 534 | 534 | 515 | 8840   | 276 | 740092 | wgEncodeAv | ChIP | H1-hESC | S      | 1     | 2469  |
| dms.bed | encode_tfbs | SP4       | ESC          | H1-hESC | 0 | 0 | 0 | 478 | 534 | 534 | 534 | 515 | 31863  | 276 | 717069 | wgEncodeAv | ChIP | H1-hESC | S      | 1     | 5752  |
| dms.bed | encode_tfbs | SRF       | ESC          | H1-hESC | 0 | 0 | 0 | 478 | 534 | 534 | 534 | 515 | 6721   | 276 | 742211 | wgEncodeAv | ChIP | H1-hESC | S      | 1     | 5105  |
| dms.bed | encode_tfbs | TAF1      | ESC          | H1-hESC | 0 | 0 | 0 | 478 | 534 | 534 | 534 | 515 | 83950  | 276 | 664982 | wgEncodeAv | ChIP | H1-hESC | T      | 1     | 20547 |
| dms.bed | encode_tfbs | TAF7      | ESC          | H1-hESC | 0 | 0 | 0 | 478 | 534 | 534 | 534 | 515 | 39715  | 276 | 709217 | wgEncodeAv | ChIP | H1-hESC | T      | 1     | 10475 |
| dms.bed | encode_tfbs | TEAD4     | ESC          | H1-hESC | 0 | 0 | 0 | 478 | 534 | 534 | 534 | 515 | 11981  | 276 | 736951 | wgEncodeAv | ChIP | H1-hESC | T      | 1     | 19857 |
| dms.bed | encode_tfbs | YY1       | Colon        | HCT-116 | 0 | 0 | 0 | 478 | 534 | 534 | 534 | 515 | 28070  | 276 | 720862 | wgEncodeAv | ChIP | HCT-116 | Y      | 1     | 12749 |
| dms.bed | encode_tfbs | ZBTB33    | Colon        | HCT-116 | 0 | 0 | 0 | 478 | 534 | 534 | 534 | 515 | 12037  | 276 | 736895 | wgEncodeAv | ChIP | HCT-116 | Z      | 1     | 4325  |
| dms.bed | encode_tfbs | GABP      | Cervix       | HeLa-S3 | 0 | 0 | 0 | 478 | 534 | 534 | 534 | 515 | 17337  | 276 | 731595 | wgEncodeAv | ChIP | HeLa-S3 | G      | 1     | 6761  |
| dms.bed | encode_tfbs | NRSF      | Cervix       | HeLa-S3 | 0 | 0 | 0 | 478 | 534 | 534 | 534 | 515 | 5673   | 276 | 743259 | wgEncodeAv | ChIP | HeLa-S3 | N      | 1     | 10247 |
| dms.bed | encode_tfbs | Pol2      | Cervix       | HeLa-S3 | 0 | 0 | 0 | 478 | 534 | 534 | 534 | 515 | 89307  | 276 | 659625 | wgEncodeAv | ChIP | HeLa-S3 | P      | 1     | 25332 |
| dms.bed | encode_tfbs | ATF3      | Liver        | HepG2   | 0 | 0 | 0 | 478 | 534 | 534 | 534 | 515 | 7149   | 276 | 741783 | wgEncodeAv | ChIP | HepG2   | AT     | 1     | 3291  |
| dms.bed | encode_tfbs | BHLHE40   | Liver        | HepG2   | 0 | 0 | 0 | 478 | 534 | 534 | 534 | 515 | 2881   | 276 | 746051 | wgEncodeAv | ChIP | HepG2   | BH     | 1     | 2859  |
| dms.bed | encode_tfbs | NRSF      | Liver        | HepG2   | 0 | 0 | 0 | 478 | 534 | 534 | 534 | 515 | 11112  | 276 | 737820 | wgEncodeAv | ChIP | HepG2   | NF     | 1     | 6024  |
| dms.bed | encode_tfbs | NRSF      | Liver        | HepG2   | 0 | 0 | 0 | 478 | 534 | 534 | 534 | 515 | 33833  | 276 | 715099 | wgEncodeAv | ChIP | HepG2   | NF     | 1     | 12828 |
| dms.bed | encode_tfbs | Pol2-4H8  | Liver        | HepG2   | 0 | 0 | 0 | 478 | 534 | 534 | 534 | 515 | 55219  | 276 | 693713 | wgEncodeAv | ChIP | HepG2   | Po     | 1     | 19586 |
| dms.bed | encode_tfbs | SP2       | Liver        | HepG2   | 0 | 0 | 0 | 478 | 534 | 534 | 534 | 515 | 3655   | 276 | 745277 | wgEncodeAv | ChIP | HepG2   | SP     | 1     | 2626  |
| dms.bed | encode_tfbs | SRF       | Liver        | HepG2   | 0 | 0 | 0 | 478 | 534 | 534 | 534 | 515 | 4527   | 276 | 744405 | wgEncodeAv | ChIP | HepG2   | SR     | 1     | 5314  |
| dms.bed | encode_tfbs | TCF12     | Liver        | HepG2   | 0 | 0 | 0 | 478 | 534 | 534 | 534 | 515 | 716    | 276 | 748216 | wgEncodeAv | ChIP | HepG2   | TC     | 1     | 2061  |
| dms.bed | encode_tfbs | ZBTB33    | Liver        | HepG2   | 0 | 0 | 0 | 478 | 534 | 534 | 534 | 515 | 5908   | 276 | 743024 | wgEncodeAv | ChIP | HepG2   | ZB     | 1     | 2879  |
| dms.bed | encode_tfbs | ZBTB7A    | Liver        | HepG2   | 0 | 0 | 0 | 478 | 534 | 534 | 534 | 515 | 13679  | 276 | 735253 | wgEncodeAv | ChIP | HepG2   | ZB     | 1     | 9189  |
| dms.bed | encode_tfbs | Pol2      | Blood vessel | HUVEC   | 0 | 0 | 0 | 478 | 534 | 534 | 534 | 515 | 74490  | 276 | 674442 | wgEncodeAv | ChIP | HUVEC   | Po     | 1     | 19254 |
| dms.bed | encode_tfbs | BCL3      | Blood        | K562    | 0 | 0 | 0 | 478 | 534 | 534 | 534 | 515 | 1490   | 276 | 747442 | wgEncodeAv | ChIP | K562    | BCL3   | 1     | 1603  |
| dms.bed | encode_tfbs | BCLAF1    | Blood        | K562    | 0 | 0 | 0 | 478 | 534 | 534 | 534 | 515 | 11843  | 276 | 737089 | wgEncodeAv | ChIP | K562    | BCLAF1 | 1     | 4444  |
| dms.bed | encode_tfbs | CTCF      | Blood        | K562    | 0 | 0 | 0 | 478 | 534 | 534 | 534 | 515 | 12294  | 276 | 736638 | wgEncodeAv | ChIP | K562    | CTCF   | 1     | 11533 |
| dms.bed | encode_tfbs | ETS1      | Blood        | K562    | 0 | 0 | 0 | 478 | 534 | 534 | 534 | 515 | 37939  | 276 | 710993 | wgEncodeAv | ChIP | K562    | ETS1   | 1     | 10726 |
| dms.bed | encode_tfbs | FOSL1     | Blood        | K562    | 0 | 0 | 0 | 478 | 534 | 534 | 534 | 515 | 4569   | 276 | 744363 | wgEncodeAv | ChIP | K562    | FOSL1  | 1     | 11174 |
| dms.bed | encode_tfbs | GABP      | Blood        | K562    | 0 | 0 | 0 | 478 | 534 | 534 | 534 | 515 | 33517  | 276 | 715415 | wgEncodeAv | ChIP | K562    | GABP   | 1     | 14393 |
| dms.bed | encode_tfbs | GATA2     | Blood        | K562    | 0 | 0 | 0 | 478 | 534 | 534 | 534 | 515 | 3786   | 276 | 745146 | wgEncodeAv | ChIP | K562    | GATA2  | 1     | 19322 |
| dms.bed | encode_tfbs | HDAC2     | Blood        | K562    | 0 | 0 | 0 | 478 | 534 | 534 | 534 | 515 | 6630   | 276 | 742302 | wgEncodeAv | ChIP | K562    | HDAC2  | 1     | 6672  |
| dms.bed | encode_tfbs | MEF2A     | Blood        | K562    | 0 | 0 | 0 | 478 | 534 | 534 | 534 | 515 | 2911   | 276 | 746021 | wgEncodeAv | ChIP | K562    | MEF2A  | 1     | 5631  |
| dms.bed | encode_tfbs | NR2F2     | Blood        | K562    | 0 | 0 | 0 | 478 | 534 | 534 | 534 | 515 | 13148  | 276 | 735784 | wgEncodeAv | ChIP | K562    | NR2F2  | 1     | 16678 |
| dms.bed | encode_tfbs | NRSF      | Blood        | K562    | 0 | 0 | 0 | 478 | 534 | 534 | 534 | 515 | 13072  | 276 | 735860 | wgEncodeAv | ChIP | K562    | NRSF   | 1     | 15849 |
| dms.bed | encode_tfbs | PML       | Blood        | K562    | 0 | 0 | 0 | 478 | 534 | 534 | 534 | 515 | 44197  | 276 | 704735 | wgEncodeAv | ChIP | K562    | PML    | 1     | 15895 |
| dms.bed | encode_tfbs | Pol2      | Blood        | K562    | 0 | 0 | 0 | 478 | 534 | 534 | 534 | 515 | 113609 | 276 | 635323 | wgEncodeAv | ChIP | K562    | Pol2   | 1     | 24989 |

|         |             |                 |          |            |   |   |   |     |     |     |     |     |       |     |        |            |                 |   |       |
|---------|-------------|-----------------|----------|------------|---|---|---|-----|-----|-----|-----|-----|-------|-----|--------|------------|-----------------|---|-------|
| dms.bed | encode_tfbs | PU.1            | Blood    | K562       | 0 | 0 | 0 | 478 | 534 | 534 | 534 | 515 | 10781 | 276 | 738151 | wgEncodeAv | ChIP K562 PU.1  | 1 | 28677 |
| dms.bed | encode_tfbs | Sin3Ak-20       | Blood    | K562       | 0 | 0 | 0 | 478 | 534 | 534 | 534 | 515 | 34562 | 276 | 714370 | wgEncodeAv | ChIP K562 Sin3  | 1 | 12700 |
| dms.bed | encode_tfbs | SIX5            | Blood    | K562       | 0 | 0 | 0 | 478 | 534 | 534 | 534 | 515 | 9976  | 276 | 738956 | wgEncodeAv | ChIP K562 SIX5  | 1 | 4194  |
| dms.bed | encode_tfbs | SP1             | Blood    | K562       | 0 | 0 | 0 | 478 | 534 | 534 | 534 | 515 | 18028 | 276 | 730904 | wgEncodeAv | ChIP K562 SP1   | 1 | 7206  |
| dms.bed | encode_tfbs | SP2             | Blood    | K562       | 0 | 0 | 0 | 478 | 534 | 534 | 534 | 515 | 8512  | 276 | 740420 | wgEncodeAv | ChIP K562 SP2_  | 1 | 3124  |
| dms.bed | encode_tfbs | SRF             | Blood    | K562       | 0 | 0 | 0 | 478 | 534 | 534 | 534 | 515 | 7406  | 276 | 741526 | wgEncodeAv | ChIP K562 SRF   | 1 | 4717  |
| dms.bed | encode_tfbs | STAT5A          | Blood    | K562       | 0 | 0 | 0 | 478 | 534 | 534 | 534 | 515 | 5881  | 276 | 743051 | wgEncodeAv | ChIP K562 STA1  | 1 | 9811  |
| dms.bed | encode_tfbs | TAF1            | Blood    | K562       | 0 | 0 | 0 | 478 | 534 | 534 | 534 | 515 | 52624 | 276 | 696308 | wgEncodeAv | ChIP K562 TAF:  | 1 | 15246 |
| dms.bed | encode_tfbs | TAF7            | Blood    | K562       | 0 | 0 | 0 | 478 | 534 | 534 | 534 | 515 | 9184  | 276 | 739748 | wgEncodeAv | ChIP K562 TAF:  | 1 | 3422  |
| dms.bed | encode_tfbs | THAP1           | Blood    | K562       | 0 | 0 | 0 | 478 | 534 | 534 | 534 | 515 | 13124 | 276 | 735808 | wgEncodeAv | ChIP K562 THA   | 1 | 3506  |
| dms.bed | encode_tfbs | TRIM28          | Blood    | K562       | 0 | 0 | 0 | 478 | 534 | 534 | 534 | 515 | 13171 | 276 | 735761 | wgEncodeAv | ChIP K562 TRIM  | 1 | 12137 |
| dms.bed | encode_tfbs | YY1             | Blood    | K562       | 0 | 0 | 0 | 478 | 534 | 534 | 534 | 515 | 40256 | 276 | 708676 | wgEncodeAv | ChIP K562 YY1_  | 1 | 12677 |
| dms.bed | encode_tfbs | YY1             | Blood    | K562       | 0 | 0 | 0 | 478 | 534 | 534 | 534 | 515 | 46331 | 276 | 702601 | wgEncodeAv | ChIP K562 YY1   | 1 | 24059 |
| dms.bed | encode_tfbs | ZBTB33          | Blood    | K562       | 0 | 0 | 0 | 478 | 534 | 534 | 534 | 515 | 6600  | 276 | 742332 | wgEncodeAv | ChIP K562 ZBTE  | 1 | 3285  |
| dms.bed | encode_tfbs | ZBTB7A          | Blood    | K562       | 0 | 0 | 0 | 478 | 534 | 534 | 534 | 515 | 58073 | 276 | 690859 | wgEncodeAv | ChIP K562 ZBTE  | 1 | 21711 |
| dms.bed | encode_tfbs | NRSF            | Pancreas | PANC-1     | 0 | 0 | 0 | 478 | 534 | 534 | 534 | 515 | 8793  | 276 | 740139 | wgEncodeAv | ChIP PANC-1 N   | 1 | 5507  |
| dms.bed | encode_tfbs | Pol2-4H8        | Pancreas | PANC-1     | 0 | 0 | 0 | 478 | 534 | 534 | 534 | 515 | 36827 | 276 | 712105 | wgEncodeAv | ChIP PANC-1 P   | 1 | 10324 |
| dms.bed | encode_tfbs | Sin3Ak-20       | Pancreas | PANC-1     | 0 | 0 | 0 | 478 | 534 | 534 | 534 | 515 | 36499 | 276 | 712433 | wgEncodeAv | ChIP PANC-1 Si  | 1 | 7182  |
| dms.bed | encode_tfbs | NRSF            | Brain    | PFSK-1     | 0 | 0 | 0 | 478 | 534 | 534 | 534 | 515 | 11999 | 276 | 736933 | wgEncodeAv | ChIP PFSK-1 NF  | 1 | 11390 |
| dms.bed | encode_tfbs | Sin3Ak-20       | Brain    | PFSK-1     | 0 | 0 | 0 | 478 | 534 | 534 | 534 | 515 | 10064 | 276 | 738868 | wgEncodeAv | ChIP PFSK-1 Sir | 1 | 5950  |
| dms.bed | encode_tfbs | TAF1            | Brain    | PFSK-1     | 0 | 0 | 0 | 478 | 534 | 534 | 534 | 515 | 25236 | 276 | 723696 | wgEncodeAv | ChIP PFSK-1 TA  | 1 | 5844  |
| dms.bed | encode_tfbs | NRSF            | Brain    | SK-N-SH    | 0 | 0 | 0 | 478 | 534 | 534 | 534 | 515 | 31988 | 276 | 716944 | wgEncodeAv | ChIP SK-N-SH N  | 1 | 18845 |
| dms.bed | encode_tfbs | NRSF            | Brain    | SK-N-SH    | 0 | 0 | 0 | 478 | 534 | 534 | 534 | 515 | 10883 | 276 | 738049 | wgEncodeAv | ChIP SK-N-SH N  | 1 | 11029 |
| dms.bed | encode_tfbs | Pol2-4H8        | Brain    | SK-N-SH    | 0 | 0 | 0 | 478 | 534 | 534 | 534 | 515 | 51956 | 276 | 696976 | wgEncodeAv | ChIP SK-N-SH P  | 1 | 28168 |
| dms.bed | encode_tfbs | Sin3Ak-20       | Brain    | SK-N-SH    | 0 | 0 | 0 | 478 | 534 | 534 | 534 | 515 | 39383 | 276 | 709549 | wgEncodeAv | ChIP SK-N-SH S  | 1 | 15561 |
| dms.bed | encode_tfbs | TAF1            | Brain    | SK-N-SH    | 0 | 0 | 0 | 478 | 534 | 534 | 534 | 515 | 43119 | 276 | 705813 | wgEncodeAv | ChIP SK-N-SH T  | 1 | 13993 |
| dms.bed | encode_tfbs | CTCF            | Brain    | SK-N-SH_RA | 0 | 0 | 0 | 478 | 534 | 534 | 534 | 515 | 15595 | 276 | 733337 | wgEncodeAv | ChIP SK-N-SH_!  | 1 | 40588 |
| dms.bed | encode_tfbs | p300            | Brain    | SK-N-SH_RA | 0 | 0 | 0 | 478 | 534 | 534 | 534 | 515 | 15645 | 276 | 733287 | wgEncodeAv | ChIP SK-N-SH_!  | 1 | 46485 |
| dms.bed | encode_tfbs | Rad21           | Brain    | SK-N-SH_RA | 0 | 0 | 0 | 478 | 534 | 534 | 534 | 515 | 22305 | 276 | 726627 | wgEncodeAv | ChIP SK-N-SH_!  | 1 | 62275 |
| dms.bed | encode_tfbs | CTCF            | Breast   | T47D       | 0 | 0 | 0 | 478 | 534 | 534 | 534 | 515 | 16091 | 276 | 732841 | wgEncodeAv | ChIP T-47D CTC  | 1 | 29285 |
| dms.bed | encode_tfbs | ERalpha_a       | Breast   | T47D       | 0 | 0 | 0 | 478 | 534 | 534 | 534 | 515 | 516   | 276 | 748416 | wgEncodeAv | ChIP T-47D ERa  | 1 | 3902  |
| dms.bed | encode_tfbs | FOXA1           | Breast   | T47D       | 0 | 0 | 0 | 478 | 534 | 534 | 534 | 515 | 13123 | 276 | 735809 | wgEncodeAv | ChIP T-47D FO)  | 1 | 41555 |
| dms.bed | encode_tfbs | p300            | Breast   | T47D       | 0 | 0 | 0 | 478 | 534 | 534 | 534 | 515 | 11761 | 276 | 737171 | wgEncodeAv | ChIP T-47D p3C  | 1 | 13973 |
| dms.bed | encode_tfbs | NRSF            | Brain    | U87        | 0 | 0 | 0 | 478 | 534 | 534 | 534 | 515 | 33158 | 276 | 715774 | wgEncodeAv | ChIP U87 NRSF   | 1 | 11746 |
| dms.bed | encode_tfbs | Pol2-4H8        | Brain    | U87        | 0 | 0 | 0 | 478 | 534 | 534 | 534 | 515 | 55287 | 276 | 693645 | wgEncodeAv | ChIP U87 Pol2-  | 1 | 22873 |
| dms.bed | encode_tfbs | BHLHE40         | Lung     | A549       | 0 | 0 | 0 | 478 | 534 | 534 | 534 | 515 | 7053  | 276 | 741879 | wgEncodeAv | ChIP A549 BHLI  | 1 | 3123  |
| dms.bed | encode_tfbs | Max             | Lung     | A549       | 0 | 0 | 0 | 478 | 534 | 534 | 534 | 515 | 31592 | 276 | 717340 | wgEncodeAv | ChIP A549 Max   | 1 | 9881  |
| dms.bed | encode_tfbs | Pol2(phosphoS2) | Lung     | A549       | 0 | 0 | 0 | 478 | 534 | 534 | 534 | 515 | 3200  | 276 | 745732 | wgEncodeAv | ChIP A549 Pol2  | 1 | 3454  |
| dms.bed | encode_tfbs | Rad21           | Lung     | A549       | 0 | 0 | 0 | 478 | 534 | 534 | 534 | 515 | 11843 | 276 | 737089 | wgEncodeAv | ChIP A549 Rad:  | 1 | 24465 |
| dms.bed | encode_tfbs | ZNF274          | Blood    | GM08714    | 0 | 0 | 0 | 478 | 534 | 534 | 534 | 515 | 33    | 276 | 748899 | wgEncodeAv | ChIP GM08714    | 1 | 667   |
| dms.bed | encode_tfbs | Pol2            | Blood    | GM10847    | 0 | 0 | 0 | 478 | 534 | 534 | 534 | 515 | 52372 | 276 | 696560 | wgEncodeAv | ChIP GM10847    | 1 | 9683  |
| dms.bed | encode_tfbs | BHLHE40         | Blood    | GM12878    | 0 | 0 | 0 | 478 | 534 | 534 | 534 | 515 | 22777 | 276 | 726155 | wgEncodeAv | ChIP GM12878    | 1 | 13986 |
| dms.bed | encode_tfbs | BRCA1           | Blood    | GM12878    | 0 | 0 | 0 | 478 | 534 | 534 | 534 | 515 | 2324  | 276 | 746608 | wgEncodeAv | ChIP GM12878    | 1 | 551   |
| dms.bed | encode_tfbs | c-Fos           | Blood    | GM12878    | 0 | 0 | 0 | 478 | 534 | 534 | 534 | 515 | 6451  | 276 | 742481 | wgEncodeAv | ChIP GM12878    | 1 | 2239  |
| dms.bed | encode_tfbs | CHD1            | Blood    | GM12878    | 0 | 0 | 0 | 478 | 534 | 534 | 534 | 515 | 15940 | 276 | 732992 | wgEncodeAv | ChIP GM12878    | 1 | 6668  |
| dms.bed | encode_tfbs | CHD2            | Blood    | GM12878    | 0 | 0 | 0 | 478 | 534 | 534 | 534 | 515 | 40573 | 276 | 708359 | wgEncodeAv | ChIP GM12878    | 1 | 15597 |
| dms.bed | encode_tfbs | COREST          | Blood    | GM12878    | 0 | 0 | 0 | 478 | 534 | 534 | 534 | 515 | 4144  | 276 | 744788 | wgEncodeAv | ChIP GM12878    | 1 | 1397  |
| dms.bed | encode_tfbs | CTCF            | Blood    | GM12878    | 0 | 0 | 0 | 478 | 534 | 534 | 534 | 515 | 24866 | 276 | 724066 | wgEncodeAv | ChIP GM12878    | 1 | 55551 |
| dms.bed | encode_tfbs | E2F4            | Blood    | GM12878    | 0 | 0 | 0 | 478 | 534 | 534 | 534 | 515 | 13570 | 276 | 735362 | wgEncodeAv | ChIP GM12878    | 1 | 3440  |
| dms.bed | encode_tfbs | ELK1            | Blood    | GM12878    | 0 | 0 | 0 | 478 | 534 | 534 | 534 | 515 | 21924 | 276 | 727008 | wgEncodeAv | ChIP GM12878    | 1 | 5584  |
| dms.bed | encode_tfbs | IKZF1_(IkN)     | Blood    | GM12878    | 0 | 0 | 0 | 478 | 534 | 534 | 534 | 515 | 1777  | 276 | 747155 | wgEncodeAv | ChIP GM12878    | 1 | 9047  |
| dms.bed | encode_tfbs | JunD            | Blood    | GM12878    | 0 | 0 | 0 | 478 | 534 | 534 | 534 | 515 | 62    | 276 | 748870 | wgEncodeAv | ChIP GM12878    | 1 | 2472  |
| dms.bed | encode_tfbs | Max             | Blood    | GM12878    | 0 | 0 | 0 | 478 | 534 | 534 | 534 | 515 | 46986 | 276 | 701946 | wgEncodeAv | ChIP GM12878    | 1 | 12542 |
| dms.bed | encode_tfbs | MAZ             | Blood    | GM12878    | 0 | 0 | 0 | 478 | 534 | 534 | 534 | 515 | 65012 | 276 | 683920 | wgEncodeAv | ChIP GM12878    | 1 | 18952 |
| dms.bed | encode_tfbs | NF-E2           | Blood    | GM12878    | 0 | 0 | 0 | 478 | 534 | 534 | 534 | 515 | 1620  | 276 | 747312 | wgEncodeAv | ChIP GM12878    | 1 | 772   |
| dms.bed | encode_tfbs | NF-YA           | Blood    | GM12878    | 0 | 0 | 0 | 478 | 534 | 534 | 534 | 515 | 6090  | 276 | 742842 | wgEncodeAv | ChIP GM12878    | 1 | 1841  |
| dms.bed | encode_tfbs | NF-YB           | Blood    | GM12878    | 0 | 0 | 0 | 478 | 534 | 534 | 534 | 515 | 22477 | 276 | 726455 | wgEncodeAv | ChIP GM12878    | 1 | 13295 |

|         |             |                 |        |              |   |   |   |     |     |     |     |     |       |     |        |                           |   |       |
|---------|-------------|-----------------|--------|--------------|---|---|---|-----|-----|-----|-----|-----|-------|-----|--------|---------------------------|---|-------|
| dms.bed | encode_tfbs | Nrf1            | Blood  | GM12878      | 0 | 0 | 0 | 478 | 534 | 534 | 534 | 515 | 20932 | 276 | 728000 | wgEncodeAv ChIP GM12878   | 1 | 5683  |
| dms.bed | encode_tfbs | p300            | Blood  | GM12878      | 0 | 0 | 0 | 478 | 534 | 534 | 534 | 515 | 11238 | 276 | 737694 | wgEncodeAv ChIP GM12878   | 1 | 17461 |
| dms.bed | encode_tfbs | p300            | Blood  | GM12878      | 0 | 0 | 0 | 478 | 534 | 534 | 534 | 515 | 1105  | 276 | 747827 | wgEncodeAv ChIP GM12878   | 1 | 6189  |
| dms.bed | encode_tfbs | Pol2            | Blood  | GM12878      | 0 | 0 | 0 | 478 | 534 | 534 | 534 | 515 | 67488 | 276 | 681444 | wgEncodeAv ChIP GM12878   | 1 | 21947 |
| dms.bed | encode_tfbs | Pol2            | Blood  | GM12878      | 0 | 0 | 0 | 478 | 534 | 534 | 534 | 515 | 43318 | 276 | 705614 | wgEncodeAv ChIP GM12878   | 1 | 11086 |
| dms.bed | encode_tfbs | Pol2(phosphoS2) | Blood  | GM12878      | 0 | 0 | 0 | 478 | 534 | 534 | 534 | 515 | 44571 | 276 | 704361 | wgEncodeAv ChIP GM12878   | 1 | 9370  |
| dms.bed | encode_tfbs | Pol3            | Blood  | GM12878      | 0 | 0 | 0 | 478 | 534 | 534 | 534 | 515 | 258   | 276 | 748674 | wgEncodeAv ChIP GM12878   | 1 | 211   |
| dms.bed | encode_tfbs | Rad21           | Blood  | GM12878      | 0 | 0 | 0 | 478 | 534 | 534 | 534 | 515 | 12304 | 276 | 736628 | wgEncodeAv ChIP GM12878   | 1 | 33085 |
| dms.bed | encode_tfbs | RFX5            | Blood  | GM12878      | 0 | 0 | 0 | 478 | 534 | 534 | 534 | 515 | 12178 | 276 | 736754 | wgEncodeAv ChIP GM12878   | 1 | 4341  |
| dms.bed | encode_tfbs | SIN3A           | Blood  | GM12878      | 0 | 0 | 0 | 478 | 534 | 534 | 534 | 515 | 49236 | 276 | 699696 | wgEncodeAv ChIP GM12878   | 1 | 10392 |
| dms.bed | encode_tfbs | SMC3            | Blood  | GM12878      | 0 | 0 | 0 | 478 | 534 | 534 | 534 | 515 | 14630 | 276 | 734302 | wgEncodeAv ChIP GM12878   | 1 | 30517 |
| dms.bed | encode_tfbs | STAT1           | Blood  | GM12878      | 0 | 0 | 0 | 478 | 534 | 534 | 534 | 515 | 5076  | 276 | 743856 | wgEncodeAv ChIP GM12878   | 1 | 1769  |
| dms.bed | encode_tfbs | STAT3           | Blood  | GM12878      | 0 | 0 | 0 | 478 | 534 | 534 | 534 | 515 | 3164  | 276 | 745768 | wgEncodeAv ChIP GM12878   | 1 | 6487  |
| dms.bed | encode_tfbs | TBLR1           | Blood  | GM12878      | 0 | 0 | 0 | 478 | 534 | 534 | 534 | 515 | 22942 | 276 | 725990 | wgEncodeAv ChIP GM12878   | 1 | 13702 |
| dms.bed | encode_tfbs | TBP             | Blood  | GM12878      | 0 | 0 | 0 | 478 | 534 | 534 | 534 | 515 | 29537 | 276 | 719395 | wgEncodeAv ChIP GM12878   | 1 | 14893 |
| dms.bed | encode_tfbs | TR4             | Blood  | GM12878      | 0 | 0 | 0 | 478 | 534 | 534 | 534 | 515 | 2338  | 276 | 746594 | wgEncodeAv ChIP GM12878   | 1 | 1263  |
| dms.bed | encode_tfbs | USF2            | Blood  | GM12878      | 0 | 0 | 0 | 478 | 534 | 534 | 534 | 515 | 12767 | 276 | 736165 | wgEncodeAv ChIP GM12878   | 1 | 9022  |
| dms.bed | encode_tfbs | WHIP            | Blood  | GM12878      | 0 | 0 | 0 | 478 | 534 | 534 | 534 | 515 | 14416 | 276 | 734516 | wgEncodeAv ChIP GM12878   | 1 | 14102 |
| dms.bed | encode_tfbs | YY1             | Blood  | GM12878      | 0 | 0 | 0 | 478 | 534 | 534 | 534 | 515 | 1274  | 276 | 747658 | wgEncodeAv ChIP GM12878   | 1 | 2077  |
| dms.bed | encode_tfbs | Znf143          | Blood  | GM12878      | 0 | 0 | 0 | 478 | 534 | 534 | 534 | 515 | 25617 | 276 | 723315 | wgEncodeAv ChIP GM12878   | 1 | 20024 |
| dms.bed | encode_tfbs | ZNF274          | Blood  | GM12878      | 0 | 0 | 0 | 478 | 534 | 534 | 534 | 515 | 3     | 276 | 748929 | wgEncodeAv ChIP GM12878   | 1 | 233   |
| dms.bed | encode_tfbs | ZZZ3            | Blood  | GM12878      | 0 | 0 | 0 | 478 | 534 | 534 | 534 | 515 | 463   | 276 | 748469 | wgEncodeAv ChIP GM12878   | 1 | 713   |
| dms.bed | encode_tfbs | Pol2            | Blood  | GM12891      | 0 | 0 | 0 | 478 | 534 | 534 | 534 | 515 | 61669 | 276 | 687263 | wgEncodeAv ChIP GM12891   | 1 | 20390 |
| dms.bed | encode_tfbs | Pol2            | Blood  | GM12892      | 0 | 0 | 0 | 478 | 534 | 534 | 534 | 515 | 78354 | 276 | 670578 | wgEncodeAv ChIP GM12892   | 1 | 22544 |
| dms.bed | encode_tfbs | Pol2            | Blood  | GM15510      | 0 | 0 | 0 | 478 | 534 | 534 | 534 | 515 | 77351 | 276 | 671581 | wgEncodeAv ChIP GM15510   | 1 | 18661 |
| dms.bed | encode_tfbs | NFKB            | Blood  | GM18505      | 0 | 0 | 0 | 478 | 534 | 534 | 534 | 515 | 9331  | 276 | 739601 | wgEncodeAv ChIP GM18505   | 1 | 8805  |
| dms.bed | encode_tfbs | Pol2            | Blood  | GM18505      | 0 | 0 | 0 | 478 | 534 | 534 | 534 | 515 | 77858 | 276 | 671074 | wgEncodeAv ChIP GM18505   | 1 | 21784 |
| dms.bed | encode_tfbs | NFKB            | Blood  | GM18526      | 0 | 0 | 0 | 478 | 534 | 534 | 534 | 515 | 3303  | 276 | 745629 | wgEncodeAv ChIP GM18526   | 1 | 3070  |
| dms.bed | encode_tfbs | Pol2            | Blood  | GM18526      | 0 | 0 | 0 | 478 | 534 | 534 | 534 | 515 | 65479 | 276 | 683453 | wgEncodeAv ChIP GM18526   | 1 | 16856 |
| dms.bed | encode_tfbs | Pol2            | Blood  | GM18951      | 0 | 0 | 0 | 478 | 534 | 534 | 534 | 515 | 88138 | 276 | 660794 | wgEncodeAv ChIP GM18951   | 1 | 21218 |
| dms.bed | encode_tfbs | Pol2            | Blood  | GM19099      | 0 | 0 | 0 | 478 | 534 | 534 | 534 | 515 | 76843 | 276 | 672089 | wgEncodeAv ChIP GM19099   | 1 | 22219 |
| dms.bed | encode_tfbs | Pol2            | Blood  | GM19193      | 0 | 0 | 0 | 478 | 534 | 534 | 534 | 515 | 82602 | 276 | 666330 | wgEncodeAv ChIP GM19193   | 1 | 21404 |
| dms.bed | encode_tfbs | Bach1           | ESC    | H1-hESC      | 0 | 0 | 0 | 478 | 534 | 534 | 534 | 515 | 25055 | 276 | 723877 | wgEncodeAv ChIP H1-hESC E | 1 | 11457 |
| dms.bed | encode_tfbs | BRCA1           | ESC    | H1-hESC      | 0 | 0 | 0 | 478 | 534 | 534 | 534 | 515 | 6692  | 276 | 742240 | wgEncodeAv ChIP H1-hESC E | 1 | 2025  |
| dms.bed | encode_tfbs | CHD1            | ESC    | H1-hESC      | 0 | 0 | 0 | 478 | 534 | 534 | 534 | 515 | 6756  | 276 | 742176 | wgEncodeAv ChIP H1-hESC C | 1 | 2191  |
| dms.bed | encode_tfbs | CHD2            | ESC    | H1-hESC      | 0 | 0 | 0 | 478 | 534 | 534 | 534 | 515 | 21085 | 276 | 727847 | wgEncodeAv ChIP H1-hESC C | 1 | 6849  |
| dms.bed | encode_tfbs | c-Jun           | ESC    | H1-hESC      | 0 | 0 | 0 | 478 | 534 | 534 | 534 | 515 | 2286  | 276 | 746646 | wgEncodeAv ChIP H1-hESC c | 1 | 2148  |
| dms.bed | encode_tfbs | c-Myc           | ESC    | H1-hESC      | 0 | 0 | 0 | 478 | 534 | 534 | 534 | 515 | 13647 | 276 | 735285 | wgEncodeAv ChIP H1-hESC c | 1 | 4551  |
| dms.bed | encode_tfbs | CtBP2           | ESC    | H1-hESC      | 0 | 0 | 0 | 478 | 534 | 534 | 534 | 515 | 29330 | 276 | 719602 | wgEncodeAv ChIP H1-hESC C | 1 | 7089  |
| dms.bed | encode_tfbs | GTF2F1          | ESC    | H1-hESC      | 0 | 0 | 0 | 478 | 534 | 534 | 534 | 515 | 14994 | 276 | 733938 | wgEncodeAv ChIP H1-hESC C | 1 | 3548  |
| dms.bed | encode_tfbs | JunD            | ESC    | H1-hESC      | 0 | 0 | 0 | 478 | 534 | 534 | 534 | 515 | 11090 | 276 | 737842 | wgEncodeAv ChIP H1-hESC J | 1 | 9550  |
| dms.bed | encode_tfbs | MafK            | ESC    | H1-hESC      | 0 | 0 | 0 | 478 | 534 | 534 | 534 | 515 | 2319  | 276 | 746613 | wgEncodeAv ChIP H1-hESC M | 1 | 11425 |
| dms.bed | encode_tfbs | Max             | ESC    | H1-hESC      | 0 | 0 | 0 | 478 | 534 | 534 | 534 | 515 | 17159 | 276 | 731773 | wgEncodeAv ChIP H1-hESC M | 1 | 11129 |
| dms.bed | encode_tfbs | Mxi1            | ESC    | H1-hESC      | 0 | 0 | 0 | 478 | 534 | 534 | 534 | 515 | 20321 | 276 | 728611 | wgEncodeAv ChIP H1-hESC M | 1 | 6351  |
| dms.bed | encode_tfbs | Nrf1            | ESC    | H1-hESC      | 0 | 0 | 0 | 478 | 534 | 534 | 534 | 515 | 15205 | 276 | 733727 | wgEncodeAv ChIP H1-hESC N | 1 | 4513  |
| dms.bed | encode_tfbs | RFX5            | ESC    | H1-hESC      | 0 | 0 | 0 | 478 | 534 | 534 | 534 | 515 | 2917  | 276 | 746015 | wgEncodeAv ChIP H1-hESC F | 1 | 1695  |
| dms.bed | encode_tfbs | SIN3A           | ESC    | H1-hESC      | 0 | 0 | 0 | 478 | 534 | 534 | 534 | 515 | 77976 | 276 | 670956 | wgEncodeAv ChIP H1-hESC S | 1 | 21309 |
| dms.bed | encode_tfbs | SUZ12           | ESC    | H1-hESC      | 0 | 0 | 0 | 478 | 534 | 534 | 534 | 515 | 9211  | 276 | 739721 | wgEncodeAv ChIP H1-hESC S | 1 | 4789  |
| dms.bed | encode_tfbs | USF2            | ESC    | H1-hESC      | 0 | 0 | 0 | 478 | 534 | 534 | 534 | 515 | 10919 | 276 | 738013 | wgEncodeAv ChIP H1-hESC L | 1 | 6952  |
| dms.bed | encode_tfbs | Znf143          | ESC    | H1-hESC      | 0 | 0 | 0 | 478 | 534 | 534 | 534 | 515 | 30032 | 276 | 718900 | wgEncodeAv ChIP H1-hESC Z | 1 | 30687 |
| dms.bed | encode_tfbs | Pol2            | Colon  | HCT-116      | 0 | 0 | 0 | 478 | 534 | 534 | 534 | 515 | 68846 | 276 | 680086 | wgEncodeAv ChIP HCT-116 F | 1 | 12864 |
| dms.bed | encode_tfbs | ELK4            | Kidney | HEK293       | 0 | 0 | 0 | 478 | 534 | 534 | 534 | 515 | 7129  | 276 | 741803 | wgEncodeAv ChIP HEK293 E  | 1 | 1375  |
| dms.bed | encode_tfbs | KAP1            | Kidney | HEK293       | 0 | 0 | 0 | 478 | 534 | 534 | 534 | 515 | 20142 | 276 | 728790 | wgEncodeAv ChIP HEK293 K  | 1 | 19774 |
| dms.bed | encode_tfbs | Pol2            | Kidney | HEK293       | 0 | 0 | 0 | 478 | 534 | 534 | 534 | 515 | 55500 | 276 | 693432 | wgEncodeAv ChIP HEK293 P  | 1 | 11490 |
| dms.bed | encode_tfbs | ZNF263          | Kidney | HEK293-T-REx | 0 | 0 | 0 | 478 | 534 | 534 | 534 | 515 | 55967 | 276 | 692965 | wgEncodeAv ChIP HEK293-T  | 1 | 31453 |
| dms.bed | encode_tfbs | BAF155          | Cervix | HeLa-S3      | 0 | 0 | 0 | 478 | 534 | 534 | 534 | 515 | 17304 | 276 | 731628 | wgEncodeAv ChIP HeLa-S3 B | 1 | 8650  |
| dms.bed | encode_tfbs | BDP1            | Cervix | HeLa-S3      | 0 | 0 | 0 | 478 | 534 | 534 | 534 | 515 | 236   | 276 | 748696 | wgEncodeAv ChIP HeLa-S3 B | 1 | 508   |



|         |             |                 |        |         |   |   |   |     |     |     |     |     |        |     |        |            |      |         |     |   |       |
|---------|-------------|-----------------|--------|---------|---|---|---|-----|-----|-----|-----|-----|--------|-----|--------|------------|------|---------|-----|---|-------|
| dms.bed | encode_tfbs | BRCA1           | Cervix | HeLa-S3 | 0 | 0 | 0 | 478 | 534 | 534 | 534 | 515 | 16379  | 276 | 732553 | wgEncodeAv | ChIP | HeLa-S3 | B   | 1 | 8114  |
| dms.bed | encode_tfbs | BRF1            | Cervix | HeLa-S3 | 0 | 0 | 0 | 478 | 534 | 534 | 534 | 515 | 115    | 276 | 748817 | wgEncodeAv | ChIP | HeLa-S3 | B   | 1 | 193   |
| dms.bed | encode_tfbs | BRF2            | Cervix | HeLa-S3 | 0 | 0 | 0 | 478 | 534 | 534 | 534 | 515 | 3      | 276 | 748929 | wgEncodeAv | ChIP | HeLa-S3 | B   | 1 | 303   |
| dms.bed | encode_tfbs | Brg1            | Cervix | HeLa-S3 | 0 | 0 | 0 | 478 | 534 | 534 | 534 | 515 | 3540   | 276 | 745392 | wgEncodeAv | ChIP | HeLa-S3 | B   | 1 | 1357  |
| dms.bed | encode_tfbs | c-Fos           | Cervix | HeLa-S3 | 0 | 0 | 0 | 478 | 534 | 534 | 534 | 515 | 3346   | 276 | 745586 | wgEncodeAv | ChIP | HeLa-S3 | c   | 1 | 9325  |
| dms.bed | encode_tfbs | c-Jun           | Cervix | HeLa-S3 | 0 | 0 | 0 | 478 | 534 | 534 | 534 | 515 | 3414   | 276 | 745518 | wgEncodeAv | ChIP | HeLa-S3 | c   | 1 | 21903 |
| dms.bed | encode_tfbs | c-Myc           | Cervix | HeLa-S3 | 0 | 0 | 0 | 478 | 534 | 534 | 534 | 515 | 24704  | 276 | 724228 | wgEncodeAv | ChIP | HeLa-S3 | c   | 1 | 10226 |
| dms.bed | encode_tfbs | COREST          | Cervix | HeLa-S3 | 0 | 0 | 0 | 478 | 534 | 534 | 534 | 515 | 27227  | 276 | 721705 | wgEncodeAv | ChIP | HeLa-S3 | C   | 1 | 16322 |
| dms.bed | encode_tfbs | E2F1            | Cervix | HeLa-S3 | 0 | 0 | 0 | 478 | 534 | 534 | 534 | 515 | 26276  | 276 | 722656 | wgEncodeAv | ChIP | HeLa-S3 | E   | 1 | 5116  |
| dms.bed | encode_tfbs | E2F4            | Cervix | HeLa-S3 | 0 | 0 | 0 | 478 | 534 | 534 | 534 | 515 | 14240  | 276 | 734692 | wgEncodeAv | ChIP | HeLa-S3 | E   | 1 | 2831  |
| dms.bed | encode_tfbs | ELK1            | Cervix | HeLa-S3 | 0 | 0 | 0 | 478 | 534 | 534 | 534 | 515 | 20302  | 276 | 728630 | wgEncodeAv | ChIP | HeLa-S3 | E   | 1 | 4809  |
| dms.bed | encode_tfbs | GTF2F1          | Cervix | HeLa-S3 | 0 | 0 | 0 | 478 | 534 | 534 | 534 | 515 | 23728  | 276 | 725204 | wgEncodeAv | ChIP | HeLa-S3 | G   | 1 | 11730 |
| dms.bed | encode_tfbs | HA-E2F1         | Cervix | HeLa-S3 | 0 | 0 | 0 | 478 | 534 | 534 | 534 | 515 | 50409  | 276 | 698523 | wgEncodeAv | ChIP | HeLa-S3 | H   | 1 | 10283 |
| dms.bed | encode_tfbs | IRF3            | Cervix | HeLa-S3 | 0 | 0 | 0 | 478 | 534 | 534 | 534 | 515 | 5314   | 276 | 743618 | wgEncodeAv | ChIP | HeLa-S3 | IF  | 1 | 1587  |
| dms.bed | encode_tfbs | JunD            | Cervix | HeLa-S3 | 0 | 0 | 0 | 478 | 534 | 534 | 534 | 515 | 6465   | 276 | 742467 | wgEncodeAv | ChIP | HeLa-S3 | Ji  | 1 | 31633 |
| dms.bed | encode_tfbs | MafK            | Cervix | HeLa-S3 | 0 | 0 | 0 | 478 | 534 | 534 | 534 | 515 | 6348   | 276 | 742584 | wgEncodeAv | ChIP | HeLa-S3 | N   | 1 | 14185 |
| dms.bed | encode_tfbs | MAZ             | Cervix | HeLa-S3 | 0 | 0 | 0 | 478 | 534 | 534 | 534 | 515 | 56066  | 276 | 692866 | wgEncodeAv | ChIP | HeLa-S3 | N   | 1 | 13409 |
| dms.bed | encode_tfbs | NF-YA           | Cervix | HeLa-S3 | 0 | 0 | 0 | 478 | 534 | 534 | 534 | 515 | 18079  | 276 | 730853 | wgEncodeAv | ChIP | HeLa-S3 | N   | 1 | 5978  |
| dms.bed | encode_tfbs | NF-YB           | Cervix | HeLa-S3 | 0 | 0 | 0 | 478 | 534 | 534 | 534 | 515 | 13674  | 276 | 735258 | wgEncodeAv | ChIP | HeLa-S3 | N   | 1 | 7156  |
| dms.bed | encode_tfbs | Nrf1            | Cervix | HeLa-S3 | 0 | 0 | 0 | 478 | 534 | 534 | 534 | 515 | 11528  | 276 | 737404 | wgEncodeAv | ChIP | HeLa-S3 | N   | 1 | 2915  |
| dms.bed | encode_tfbs | Pol2            | Cervix | HeLa-S3 | 0 | 0 | 0 | 478 | 534 | 534 | 534 | 515 | 107441 | 276 | 641491 | wgEncodeAv | ChIP | HeLa-S3 | P   | 1 | 21270 |
| dms.bed | encode_tfbs | Pol2(phosphoS2) | Cervix | HeLa-S3 | 0 | 0 | 0 | 478 | 534 | 534 | 534 | 515 | 50469  | 276 | 698463 | wgEncodeAv | ChIP | HeLa-S3 | P   | 1 | 12797 |
| dms.bed | encode_tfbs | PRDM1           | Cervix | HeLa-S3 | 0 | 0 | 0 | 478 | 534 | 534 | 534 | 515 | 845    | 276 | 748087 | wgEncodeAv | ChIP | HeLa-S3 | P   | 1 | 4577  |
| dms.bed | encode_tfbs | Rad21           | Cervix | HeLa-S3 | 0 | 0 | 0 | 478 | 534 | 534 | 534 | 515 | 10946  | 276 | 737986 | wgEncodeAv | ChIP | HeLa-S3 | R   | 1 | 43420 |
| dms.bed | encode_tfbs | RFX5            | Cervix | HeLa-S3 | 0 | 0 | 0 | 478 | 534 | 534 | 534 | 515 | 18975  | 276 | 729957 | wgEncodeAv | ChIP | HeLa-S3 | R   | 1 | 19284 |
| dms.bed | encode_tfbs | RPC155          | Cervix | HeLa-S3 | 0 | 0 | 0 | 478 | 534 | 534 | 534 | 515 | 1364   | 276 | 747568 | wgEncodeAv | ChIP | HeLa-S3 | R   | 1 | 2668  |
| dms.bed | encode_tfbs | SMC3            | Cervix | HeLa-S3 | 0 | 0 | 0 | 478 | 534 | 534 | 534 | 515 | 21726  | 276 | 727206 | wgEncodeAv | ChIP | HeLa-S3 | S   | 1 | 39567 |
| dms.bed | encode_tfbs | SPT20           | Cervix | HeLa-S3 | 0 | 0 | 0 | 478 | 534 | 534 | 534 | 515 | 146    | 276 | 748786 | wgEncodeAv | ChIP | HeLa-S3 | S   | 1 | 4088  |
| dms.bed | encode_tfbs | STAT3           | Cervix | HeLa-S3 | 0 | 0 | 0 | 478 | 534 | 534 | 534 | 515 | 2231   | 276 | 746701 | wgEncodeAv | ChIP | HeLa-S3 | S   | 1 | 13834 |
| dms.bed | encode_tfbs | TBP             | Cervix | HeLa-S3 | 0 | 0 | 0 | 478 | 534 | 534 | 534 | 515 | 32528  | 276 | 716404 | wgEncodeAv | ChIP | HeLa-S3 | T   | 1 | 18489 |
| dms.bed | encode_tfbs | TCF7L2          | Cervix | HeLa-S3 | 0 | 0 | 0 | 478 | 534 | 534 | 534 | 515 | 4581   | 276 | 744351 | wgEncodeAv | ChIP | HeLa-S3 | T   | 1 | 3198  |
| dms.bed | encode_tfbs | TFIIIC-110      | Cervix | HeLa-S3 | 0 | 0 | 0 | 478 | 534 | 534 | 534 | 515 | 1596   | 276 | 747336 | wgEncodeAv | ChIP | HeLa-S3 | T   | 1 | 2616  |
| dms.bed | encode_tfbs | TR4             | Cervix | HeLa-S3 | 0 | 0 | 0 | 478 | 534 | 534 | 534 | 515 | 4416   | 276 | 744516 | wgEncodeAv | ChIP | HeLa-S3 | T   | 1 | 2115  |
| dms.bed | encode_tfbs | Znf143          | Cervix | HeLa-S3 | 0 | 0 | 0 | 478 | 534 | 534 | 534 | 515 | 16222  | 276 | 732710 | wgEncodeAv | ChIP | HeLa-S3 | Z   | 1 | 7048  |
| dms.bed | encode_tfbs | ZNF274          | Cervix | HeLa-S3 | 0 | 0 | 0 | 478 | 534 | 534 | 534 | 515 | 9      | 276 | 748923 | wgEncodeAv | ChIP | HeLa-S3 | Z   | 1 | 101   |
| dms.bed | encode_tfbs | ZZZ3            | Cervix | HeLa-S3 | 0 | 0 | 0 | 478 | 534 | 534 | 534 | 515 | 79     | 276 | 748853 | wgEncodeAv | ChIP | HeLa-S3 | Z   | 1 | 251   |
| dms.bed | encode_tfbs | BRCA1           | Liver  | HepG2   | 0 | 0 | 0 | 478 | 534 | 534 | 534 | 515 | 6200   | 276 | 742732 | wgEncodeAv | ChIP | HepG2   | BR  | 1 | 1497  |
| dms.bed | encode_tfbs | CHD2            | Liver  | HepG2   | 0 | 0 | 0 | 478 | 534 | 534 | 534 | 515 | 18227  | 276 | 730705 | wgEncodeAv | ChIP | HepG2   | CH  | 1 | 5169  |
| dms.bed | encode_tfbs | c-Jun           | Liver  | HepG2   | 0 | 0 | 0 | 478 | 534 | 534 | 534 | 515 | 2544   | 276 | 746388 | wgEncodeAv | ChIP | HepG2   | c-J | 1 | 12672 |
| dms.bed | encode_tfbs | ERRA            | Liver  | HepG2   | 0 | 0 | 0 | 478 | 534 | 534 | 534 | 515 | 1597   | 276 | 747335 | wgEncodeAv | ChIP | HepG2   | ER  | 1 | 1177  |
| dms.bed | encode_tfbs | GRp20           | Liver  | HepG2   | 0 | 0 | 0 | 478 | 534 | 534 | 534 | 515 | 3317   | 276 | 745615 | wgEncodeAv | ChIP | HepG2   | GF  | 1 | 597   |
| dms.bed | encode_tfbs | HSF1            | Liver  | HepG2   | 0 | 0 | 0 | 478 | 534 | 534 | 534 | 515 | 2243   | 276 | 746689 | wgEncodeAv | ChIP | HepG2   | HS  | 1 | 1435  |
| dms.bed | encode_tfbs | IRF3            | Liver  | HepG2   | 0 | 0 | 0 | 478 | 534 | 534 | 534 | 515 | 1884   | 276 | 747048 | wgEncodeAv | ChIP | HepG2   | IRI | 1 | 684   |
| dms.bed | encode_tfbs | JunD            | Liver  | HepG2   | 0 | 0 | 0 | 478 | 534 | 534 | 534 | 515 | 7110   | 276 | 741822 | wgEncodeAv | ChIP | HepG2   | Ju  | 1 | 32275 |
| dms.bed | encode_tfbs | MafF            | Liver  | HepG2   | 0 | 0 | 0 | 478 | 534 | 534 | 534 | 515 | 2960   | 276 | 745972 | wgEncodeAv | ChIP | HepG2   | M:  | 1 | 37637 |
| dms.bed | encode_tfbs | MafK            | Liver  | HepG2   | 0 | 0 | 0 | 478 | 534 | 534 | 534 | 515 | 2799   | 276 | 746133 | wgEncodeAv | ChIP | HepG2   | M:  | 1 | 61944 |
| dms.bed | encode_tfbs | MafK            | Liver  | HepG2   | 0 | 0 | 0 | 478 | 534 | 534 | 534 | 515 | 2964   | 276 | 745968 | wgEncodeAv | ChIP | HepG2   | M:  | 1 | 37628 |
| dms.bed | encode_tfbs | Max             | Liver  | HepG2   | 0 | 0 | 0 | 478 | 534 | 534 | 534 | 515 | 36440  | 276 | 712492 | wgEncodeAv | ChIP | HepG2   | M:  | 1 | 11854 |
| dms.bed | encode_tfbs | Mxi1            | Liver  | HepG2   | 0 | 0 | 0 | 478 | 534 | 534 | 534 | 515 | 61008  | 276 | 687924 | wgEncodeAv | ChIP | HepG2   | M:  | 1 | 20371 |
| dms.bed | encode_tfbs | Nrf1            | Liver  | HepG2   | 0 | 0 | 0 | 478 | 534 | 534 | 534 | 515 | 7798   | 276 | 741134 | wgEncodeAv | ChIP | HepG2   | Nr  | 1 | 1902  |
| dms.bed | encode_tfbs | p300            | Liver  | HepG2   | 0 | 0 | 0 | 478 | 534 | 534 | 534 | 515 | 9618   | 276 | 739314 | wgEncodeAv | ChIP | HepG2   | p3  | 1 | 6613  |
| dms.bed | encode_tfbs | PGC1A           | Liver  | HepG2   | 0 | 0 | 0 | 478 | 534 | 534 | 534 | 515 | 2231   | 276 | 746701 | wgEncodeAv | ChIP | HepG2   | PG  | 1 | 1308  |
| dms.bed | encode_tfbs | Pol2            | Liver  | HepG2   | 0 | 0 | 0 | 478 | 534 | 534 | 534 | 515 | 60927  | 276 | 688005 | wgEncodeAv | ChIP | HepG2   | Po  | 1 | 19572 |
| dms.bed | encode_tfbs | Pol2(phosphoS2) | Liver  | HepG2   | 0 | 0 | 0 | 478 | 534 | 534 | 534 | 515 | 10442  | 276 | 738490 | wgEncodeAv | ChIP | HepG2   | Po  | 1 | 4091  |
| dms.bed | encode_tfbs | RFX5            | Liver  | HepG2   | 0 | 0 | 0 | 478 | 534 | 534 | 534 | 515 | 15380  | 276 | 733552 | wgEncodeAv | ChIP | HepG2   | RF  | 1 | 6017  |
| dms.bed | encode_tfbs | TBP             | Liver  | HepG2   | 0 | 0 | 0 | 478 | 534 | 534 | 534 | 515 | 39386  | 276 | 709546 | wgEncodeAv | ChIP | HepG2   | TB  | 1 | 13806 |
| dms.bed | encode_tfbs | TCF7L2          | Liver  | HepG2   | 0 | 0 | 0 | 478 | 534 | 534 | 534 | 515 | 826    | 276 | 748106 | wgEncodeAv | ChIP | HepG2   | TC  | 1 | 2742  |

|         |             |                 |              |       |   |   |   |     |     |     |     |     |       |     |        |            |      |       |       |   |       |
|---------|-------------|-----------------|--------------|-------|---|---|---|-----|-----|-----|-----|-----|-------|-----|--------|------------|------|-------|-------|---|-------|
| dms.bed | encode_tfbs | TR4             | Liver        | HepG2 | 0 | 0 | 0 | 478 | 534 | 534 | 534 | 515 | 9815  | 276 | 739117 | wgEncodeAv | ChIP | HepG2 | TR    | 1 | 2953  |
| dms.bed | encode_tfbs | ZNF274          | Liver        | HepG2 | 0 | 0 | 0 | 478 | 534 | 534 | 534 | 515 | 6     | 276 | 748926 | wgEncodeAv | ChIP | HepG2 | ZN    | 1 | 245   |
| dms.bed | encode_tfbs | Pol2            | Blood vessel | HUVEC | 0 | 0 | 0 | 478 | 534 | 534 | 534 | 515 | 40325 | 276 | 708607 | wgEncodeAv | ChIP | HUVEC | Po    | 1 | 12305 |
| dms.bed | encode_tfbs | MafK            | Lung         | IMR90 | 0 | 0 | 0 | 478 | 534 | 534 | 534 | 515 | 3329  | 276 | 745603 | wgEncodeAv | ChIP | IMR90 | Ma    | 1 | 40788 |
| dms.bed | encode_tfbs | Pol2            | Lung         | IMR90 | 0 | 0 | 0 | 478 | 534 | 534 | 534 | 515 | 66558 | 276 | 682374 | wgEncodeAv | ChIP | IMR90 | Po    | 1 | 17647 |
| dms.bed | encode_tfbs | Rad21           | Lung         | IMR90 | 0 | 0 | 0 | 478 | 534 | 534 | 534 | 515 | 17773 | 276 | 731159 | wgEncodeAv | ChIP | IMR90 | Rad   | 1 | 37417 |
| dms.bed | encode_tfbs | ARID3A          | Blood        | K562  | 0 | 0 | 0 | 478 | 534 | 534 | 534 | 515 | 4385  | 276 | 744547 | wgEncodeAv | ChIP | K562  | ARID  | 1 | 9026  |
| dms.bed | encode_tfbs | ATF1            | Blood        | K562  | 0 | 0 | 0 | 478 | 534 | 534 | 534 | 515 | 13434 | 276 | 735498 | wgEncodeAv | ChIP | K562  | ATF1  | 1 | 14864 |
| dms.bed | encode_tfbs | ATF3            | Blood        | K562  | 0 | 0 | 0 | 478 | 534 | 534 | 534 | 515 | 4424  | 276 | 744508 | wgEncodeAv | ChIP | K562  | ATF3  | 1 | 1233  |
| dms.bed | encode_tfbs | Bach1           | Blood        | K562  | 0 | 0 | 0 | 478 | 534 | 534 | 534 | 515 | 2490  | 276 | 746442 | wgEncodeAv | ChIP | K562  | Bach  | 1 | 3806  |
| dms.bed | encode_tfbs | BDP1            | Blood        | K562  | 0 | 0 | 0 | 478 | 534 | 534 | 534 | 515 | 370   | 276 | 748562 | wgEncodeAv | ChIP | K562  | BDP   | 1 | 570   |
| dms.bed | encode_tfbs | BRF1            | Blood        | K562  | 0 | 0 | 0 | 478 | 534 | 534 | 534 | 515 | 253   | 276 | 748679 | wgEncodeAv | ChIP | K562  | BRF1  | 1 | 221   |
| dms.bed | encode_tfbs | BRF2            | Blood        | K562  | 0 | 0 | 0 | 478 | 534 | 534 | 534 | 515 | 46    | 276 | 748886 | wgEncodeAv | ChIP | K562  | BRF2  | 1 | 1087  |
| dms.bed | encode_tfbs | Brg1            | Blood        | K562  | 0 | 0 | 0 | 478 | 534 | 534 | 534 | 515 | 2768  | 276 | 746164 | wgEncodeAv | ChIP | K562  | Brg1  | 1 | 2463  |
| dms.bed | encode_tfbs | CCNT2           | Blood        | K562  | 0 | 0 | 0 | 478 | 534 | 534 | 534 | 515 | 75327 | 276 | 673605 | wgEncodeAv | ChIP | K562  | CCN   | 1 | 20057 |
| dms.bed | encode_tfbs | CHD2            | Blood        | K562  | 0 | 0 | 0 | 478 | 534 | 534 | 534 | 515 | 23251 | 276 | 725681 | wgEncodeAv | ChIP | K562  | CHD   | 1 | 7797  |
| dms.bed | encode_tfbs | c-Jun           | Blood        | K562  | 0 | 0 | 0 | 478 | 534 | 534 | 534 | 515 | 7114  | 276 | 741818 | wgEncodeAv | ChIP | K562  | c-Jun | 1 | 8827  |
| dms.bed | encode_tfbs | c-Jun           | Blood        | K562  | 0 | 0 | 0 | 478 | 534 | 534 | 534 | 515 | 2418  | 276 | 746514 | wgEncodeAv | ChIP | K562  | c-Jun | 1 | 5218  |
| dms.bed | encode_tfbs | c-Jun           | Blood        | K562  | 0 | 0 | 0 | 478 | 534 | 534 | 534 | 515 | 3214  | 276 | 745718 | wgEncodeAv | ChIP | K562  | c-Jun | 1 | 8587  |
| dms.bed | encode_tfbs | c-Myc           | Blood        | K562  | 0 | 0 | 0 | 478 | 534 | 534 | 534 | 515 | 23835 | 276 | 725097 | wgEncodeAv | ChIP | K562  | c-Myc | 1 | 7746  |
| dms.bed | encode_tfbs | c-Myc           | Blood        | K562  | 0 | 0 | 0 | 478 | 534 | 534 | 534 | 515 | 29698 | 276 | 719234 | wgEncodeAv | ChIP | K562  | c-Myc | 1 | 10583 |
| dms.bed | encode_tfbs | c-Myc           | Blood        | K562  | 0 | 0 | 0 | 478 | 534 | 534 | 534 | 515 | 46627 | 276 | 702305 | wgEncodeAv | ChIP | K562  | c-Myc | 1 | 19290 |
| dms.bed | encode_tfbs | c-Myc           | Blood        | K562  | 0 | 0 | 0 | 478 | 534 | 534 | 534 | 515 | 15105 | 276 | 733827 | wgEncodeAv | ChIP | K562  | c-Myc | 1 | 5023  |
| dms.bed | encode_tfbs | COREST          | Blood        | K562  | 0 | 0 | 0 | 478 | 534 | 534 | 534 | 515 | 6093  | 276 | 742839 | wgEncodeAv | ChIP | K562  | COR   | 1 | 6371  |
| dms.bed | encode_tfbs | E2F4            | Blood        | K562  | 0 | 0 | 0 | 478 | 534 | 534 | 534 | 515 | 34408 | 276 | 714524 | wgEncodeAv | ChIP | K562  | E2F4  | 1 | 8181  |
| dms.bed | encode_tfbs | ELK1            | Blood        | K562  | 0 | 0 | 0 | 478 | 534 | 534 | 534 | 515 | 12821 | 276 | 736111 | wgEncodeAv | ChIP | K562  | ELK1  | 1 | 2961  |
| dms.bed | encode_tfbs | GATA-1          | Blood        | K562  | 0 | 0 | 0 | 478 | 534 | 534 | 534 | 515 | 2224  | 276 | 746708 | wgEncodeAv | ChIP | K562  | GAT   | 1 | 4074  |
| dms.bed | encode_tfbs | GATA-2          | Blood        | K562  | 0 | 0 | 0 | 478 | 534 | 534 | 534 | 515 | 3139  | 276 | 745793 | wgEncodeAv | ChIP | K562  | GAT   | 1 | 10648 |
| dms.bed | encode_tfbs | GTF2B           | Blood        | K562  | 0 | 0 | 0 | 478 | 534 | 534 | 534 | 515 | 9553  | 276 | 739379 | wgEncodeAv | ChIP | K562  | GTF   | 1 | 2928  |
| dms.bed | encode_tfbs | GTF2F1          | Blood        | K562  | 0 | 0 | 0 | 478 | 534 | 534 | 534 | 515 | 15910 | 276 | 733022 | wgEncodeAv | ChIP | K562  | GTF   | 1 | 3621  |
| dms.bed | encode_tfbs | Ini1            | Blood        | K562  | 0 | 0 | 0 | 478 | 534 | 534 | 534 | 515 | 2089  | 276 | 746843 | wgEncodeAv | ChIP | K562  | Ini1  | 1 | 1942  |
| dms.bed | encode_tfbs | IRF1            | Blood        | K562  | 0 | 0 | 0 | 478 | 534 | 534 | 534 | 515 | 622   | 276 | 748310 | wgEncodeAv | ChIP | K562  | IRF1  | 1 | 1299  |
| dms.bed | encode_tfbs | IRF1            | Blood        | K562  | 0 | 0 | 0 | 478 | 534 | 534 | 534 | 515 | 15565 | 276 | 733367 | wgEncodeAv | ChIP | K562  | IRF1  | 1 | 8352  |
| dms.bed | encode_tfbs | IRF1            | Blood        | K562  | 0 | 0 | 0 | 478 | 534 | 534 | 534 | 515 | 26007 | 276 | 722925 | wgEncodeAv | ChIP | K562  | IRF1  | 1 | 10323 |
| dms.bed | encode_tfbs | IRF1            | Blood        | K562  | 0 | 0 | 0 | 478 | 534 | 534 | 534 | 515 | 42873 | 276 | 706059 | wgEncodeAv | ChIP | K562  | IRF1  | 1 | 12576 |
| dms.bed | encode_tfbs | KAP1            | Blood        | K562  | 0 | 0 | 0 | 478 | 534 | 534 | 534 | 515 | 610   | 276 | 748322 | wgEncodeAv | ChIP | K562  | KAP   | 1 | 5489  |
| dms.bed | encode_tfbs | MafF            | Blood        | K562  | 0 | 0 | 0 | 478 | 534 | 534 | 534 | 515 | 3404  | 276 | 745528 | wgEncodeAv | ChIP | K562  | Maf   | 1 | 25074 |
| dms.bed | encode_tfbs | MafK            | Blood        | K562  | 0 | 0 | 0 | 478 | 534 | 534 | 534 | 515 | 3161  | 276 | 745771 | wgEncodeAv | ChIP | K562  | Maf   | 1 | 19317 |
| dms.bed | encode_tfbs | Mxi1            | Blood        | K562  | 0 | 0 | 0 | 478 | 534 | 534 | 534 | 515 | 21392 | 276 | 727540 | wgEncodeAv | ChIP | K562  | Mxi1  | 1 | 6711  |
| dms.bed | encode_tfbs | NELFe           | Blood        | K562  | 0 | 0 | 0 | 478 | 534 | 534 | 534 | 515 | 2423  | 276 | 746509 | wgEncodeAv | ChIP | K562  | NEL   | 1 | 458   |
| dms.bed | encode_tfbs | NF-E2           | Blood        | K562  | 0 | 0 | 0 | 478 | 534 | 534 | 534 | 515 | 1310  | 276 | 747622 | wgEncodeAv | ChIP | K562  | NF-E  | 1 | 2637  |
| dms.bed | encode_tfbs | NF-YA           | Blood        | K562  | 0 | 0 | 0 | 478 | 534 | 534 | 534 | 515 | 9989  | 276 | 738943 | wgEncodeAv | ChIP | K562  | NF-Y  | 1 | 4286  |
| dms.bed | encode_tfbs | NF-YB           | Blood        | K562  | 0 | 0 | 0 | 478 | 534 | 534 | 534 | 515 | 13744 | 276 | 735188 | wgEncodeAv | ChIP | K562  | NF-Y  | 1 | 10096 |
| dms.bed | encode_tfbs | Nrf1            | Blood        | K562  | 0 | 0 | 0 | 478 | 534 | 534 | 534 | 515 | 14724 | 276 | 734208 | wgEncodeAv | ChIP | K562  | Nrf1  | 1 | 4211  |
| dms.bed | encode_tfbs | Pol2            | Blood        | K562  | 0 | 0 | 0 | 478 | 534 | 534 | 534 | 515 | 56586 | 276 | 692346 | wgEncodeAv | ChIP | K562  | Pol2  | 1 | 13845 |
| dms.bed | encode_tfbs | Pol2            | Blood        | K562  | 0 | 0 | 0 | 478 | 534 | 534 | 534 | 515 | 53810 | 276 | 695122 | wgEncodeAv | ChIP | K562  | Pol2  | 1 | 13582 |
| dms.bed | encode_tfbs | Pol2            | Blood        | K562  | 0 | 0 | 0 | 478 | 534 | 534 | 534 | 515 | 55820 | 276 | 693112 | wgEncodeAv | ChIP | K562  | Pol2  | 1 | 16558 |
| dms.bed | encode_tfbs | Pol2            | Blood        | K562  | 0 | 0 | 0 | 478 | 534 | 534 | 534 | 515 | 62753 | 276 | 686179 | wgEncodeAv | ChIP | K562  | Pol2  | 1 | 16522 |
| dms.bed | encode_tfbs | Pol2            | Blood        | K562  | 0 | 0 | 0 | 478 | 534 | 534 | 534 | 515 | 22346 | 276 | 726586 | wgEncodeAv | ChIP | K562  | Pol2  | 1 | 9974  |
| dms.bed | encode_tfbs | Pol2            | Blood        | K562  | 0 | 0 | 0 | 478 | 534 | 534 | 534 | 515 | 65220 | 276 | 683712 | wgEncodeAv | ChIP | K562  | Pol2  | 1 | 18081 |
| dms.bed | encode_tfbs | Pol2(phosphoS2) | Blood        | K562  | 0 | 0 | 0 | 478 | 534 | 534 | 534 | 515 | 15993 | 276 | 732939 | wgEncodeAv | ChIP | K562  | Pol2  | 1 | 5397  |
| dms.bed | encode_tfbs | Pol2(phosphoS2) | Blood        | K562  | 0 | 0 | 0 | 478 | 534 | 534 | 534 | 515 | 1700  | 276 | 747232 | wgEncodeAv | ChIP | K562  | Pol2  | 1 | 2220  |
| dms.bed | encode_tfbs | Pol3            | Blood        | K562  | 0 | 0 | 0 | 478 | 534 | 534 | 534 | 515 | 473   | 276 | 748459 | wgEncodeAv | ChIP | K562  | Pol3  | 1 | 207   |
| dms.bed | encode_tfbs | Rad21           | Blood        | K562  | 0 | 0 | 0 | 478 | 534 | 534 | 534 | 515 | 5231  | 276 | 743701 | wgEncodeAv | ChIP | K562  | Rad   | 1 | 17627 |
| dms.bed | encode_tfbs | RFX5            | Blood        | K562  | 0 | 0 | 0 | 478 | 534 | 534 | 534 | 515 | 4863  | 276 | 744069 | wgEncodeAv | ChIP | K562  | RFX   | 1 | 2201  |
| dms.bed | encode_tfbs | RPC155          | Blood        | K562  | 0 | 0 | 0 | 478 | 534 | 534 | 534 | 515 | 1246  | 276 | 747686 | wgEncodeAv | ChIP | K562  | RPC   | 1 | 1310  |
| dms.bed | encode_tfbs | SETDB1          | Blood        | K562  | 0 | 0 | 0 | 478 | 534 | 534 | 534 | 515 | 497   | 276 | 748435 | wgEncodeAv | ChIP | K562  | SET   | 1 | 2967  |

|         |             |          |              |               |   |   |   |     |     |     |     |     |       |     |        |            |      |          |      |       |       |
|---------|-------------|----------|--------------|---------------|---|---|---|-----|-----|-----|-----|-----|-------|-----|--------|------------|------|----------|------|-------|-------|
| dms.bed | encode_tfbs | SIRT6    | Blood        | K562          | 0 | 0 | 0 | 478 | 534 | 534 | 534 | 515 | 1037  | 276 | 747895 | wgEncodeAv | ChIP | K562     | SIRT | 1     | 2305  |
| dms.bed | encode_tfbs | STAT1    | Blood        | K562          | 0 | 0 | 0 | 478 | 534 | 534 | 534 | 515 | 1230  | 276 | 747702 | wgEncodeAv | ChIP | K562     | STAT | 1     | 1503  |
| dms.bed | encode_tfbs | STAT1    | Blood        | K562          | 0 | 0 | 0 | 478 | 534 | 534 | 534 | 515 | 1506  | 276 | 747426 | wgEncodeAv | ChIP | K562     | STAT | 1     | 1476  |
| dms.bed | encode_tfbs | STAT2    | Blood        | K562          | 0 | 0 | 0 | 478 | 534 | 534 | 534 | 515 | 3974  | 276 | 744958 | wgEncodeAv | ChIP | K562     | STAT | 1     | 3040  |
| dms.bed | encode_tfbs | STAT2    | Blood        | K562          | 0 | 0 | 0 | 478 | 534 | 534 | 534 | 515 | 1099  | 276 | 747833 | wgEncodeAv | ChIP | K562     | STAT | 1     | 1923  |
| dms.bed | encode_tfbs | TBLR1    | Blood        | K562          | 0 | 0 | 0 | 478 | 534 | 534 | 534 | 515 | 11507 | 276 | 737425 | wgEncodeAv | ChIP | K562     | TBLF | 1     | 5086  |
| dms.bed | encode_tfbs | TBLR1    | Blood        | K562          | 0 | 0 | 0 | 478 | 534 | 534 | 534 | 515 | 10282 | 276 | 738650 | wgEncodeAv | ChIP | K562     | TBLF | 1     | 8505  |
| dms.bed | encode_tfbs | TBP      | Blood        | K562          | 0 | 0 | 0 | 478 | 534 | 534 | 534 | 515 | 50960 | 276 | 697972 | wgEncodeAv | ChIP | K562     | TBP  | 1     | 17558 |
| dms.bed | encode_tfbs | UBF      | Blood        | K562          | 0 | 0 | 0 | 478 | 534 | 534 | 534 | 515 | 28927 | 276 | 720005 | wgEncodeAv | ChIP | K562     | UBF  | 1     | 6002  |
| dms.bed | encode_tfbs | UBTF     | Blood        | K562          | 0 | 0 | 0 | 478 | 534 | 534 | 534 | 515 | 51472 | 276 | 697460 | wgEncodeAv | ChIP | K562     | UBT  | 1     | 13692 |
| dms.bed | encode_tfbs | USF2     | Blood        | K562          | 0 | 0 | 0 | 478 | 534 | 534 | 534 | 515 | 4714  | 276 | 744218 | wgEncodeAv | ChIP | K562     | USF  | 1     | 3083  |
| dms.bed | encode_tfbs | Znf143   | Blood        | K562          | 0 | 0 | 0 | 478 | 534 | 534 | 534 | 515 | 27747 | 276 | 721185 | wgEncodeAv | ChIP | K562     | Znf1 | 1     | 29069 |
| dms.bed | encode_tfbs | ZNF263   | Blood        | K562          | 0 | 0 | 0 | 478 | 534 | 534 | 534 | 515 | 6069  | 276 | 742863 | wgEncodeAv | ChIP | K562     | ZNF  | 1     | 3081  |
| dms.bed | encode_tfbs | ZNF274   | Blood        | K562          | 0 | 0 | 0 | 478 | 534 | 534 | 534 | 515 | 15    | 276 | 748917 | wgEncodeAv | ChIP | K562     | ZNF  | 1     | 305   |
| dms.bed | encode_tfbs | ZNF274   | Blood        | K562          | 0 | 0 | 0 | 478 | 534 | 534 | 534 | 515 | 1647  | 276 | 747285 | wgEncodeAv | ChIP | K562     | ZNF  | 1     | 1997  |
| dms.bed | encode_tfbs | E2F4     | Breast       | MCF10A-Er-Src | 0 | 0 | 0 | 478 | 534 | 534 | 534 | 515 | 38685 | 276 | 710247 | wgEncodeAv | ChIP | MCF10A-E | 1    | 15516 |       |
| dms.bed | encode_tfbs | Pol2     | Breast       | MCF10A-Er-Src | 0 | 0 | 0 | 478 | 534 | 534 | 534 | 515 | 80084 | 276 | 668848 | wgEncodeAv | ChIP | MCF10A-E | 1    | 22298 |       |
| dms.bed | encode_tfbs | Pol2     | Breast       | MCF10A-Er-Src | 0 | 0 | 0 | 478 | 534 | 534 | 534 | 515 | 77361 | 276 | 671571 | wgEncodeAv | ChIP | MCF10A-E | 1    | 19467 |       |
| dms.bed | encode_tfbs | GATA3    | Breast       | MCF-7         | 0 | 0 | 0 | 478 | 534 | 534 | 534 | 515 | 194   | 276 | 748738 | wgEncodeAv | ChIP | MCF-7    | GA   | 1     | 6081  |
| dms.bed | encode_tfbs | GATA3    | Breast       | MCF-7         | 0 | 0 | 0 | 478 | 534 | 534 | 534 | 515 | 2637  | 276 | 746295 | wgEncodeAv | ChIP | MCF-7    | GA   | 1     | 12077 |
| dms.bed | encode_tfbs | TCF7L2   | Breast       | MCF-7         | 0 | 0 | 0 | 478 | 534 | 534 | 534 | 515 | 6114  | 276 | 742818 | wgEncodeAv | ChIP | MCF-7    | TCI  | 1     | 10293 |
| dms.bed | encode_tfbs | ZNF217   | Breast       | MCF-7         | 0 | 0 | 0 | 478 | 534 | 534 | 534 | 515 | 2178  | 276 | 746754 | wgEncodeAv | ChIP | MCF-7    | ZN   | 1     | 9933  |
| dms.bed | encode_tfbs | Pol2     | Blood        | NB4           | 0 | 0 | 0 | 478 | 534 | 534 | 534 | 515 | 63223 | 276 | 685709 | wgEncodeAv | ChIP | NB4      | Pol2 | 1     | 16703 |
| dms.bed | encode_tfbs | SUZ12    | Testis       | NT2-D1        | 0 | 0 | 0 | 478 | 534 | 534 | 534 | 515 | 18784 | 276 | 730148 | wgEncodeAv | ChIP | NT2-D1   | SL   | 1     | 3308  |
| dms.bed | encode_tfbs | YY1      | Testis       | NT2-D1        | 0 | 0 | 0 | 478 | 534 | 534 | 534 | 515 | 14605 | 276 | 734327 | wgEncodeAv | ChIP | NT2-D1   | Y    | 1     | 4862  |
| dms.bed | encode_tfbs | ZNF274   | Testis       | NT2-D1        | 0 | 0 | 0 | 478 | 534 | 534 | 534 | 515 | 55    | 276 | 748877 | wgEncodeAv | ChIP | NT2-D1   | ZI   | 1     | 745   |
| dms.bed | encode_tfbs | GATA-1   | Blood        | PBDE          | 0 | 0 | 0 | 478 | 534 | 534 | 534 | 515 | 24317 | 276 | 724615 | wgEncodeAv | ChIP | PBDE     | GAT  | 1     | 25001 |
| dms.bed | encode_tfbs | Pol2     | Blood        | PBDE          | 0 | 0 | 0 | 478 | 534 | 534 | 534 | 515 | 76406 | 276 | 672526 | wgEncodeAv | ChIP | PBDE     | Pol2 | 1     | 18332 |
| dms.bed | encode_tfbs | GATA-1   | Blood        | PBDEFetal     | 0 | 0 | 0 | 478 | 534 | 534 | 534 | 515 | 1221  | 276 | 747711 | wgEncodeAv | ChIP | PBDEFeta | 1    | 2157  |       |
| dms.bed | encode_tfbs | Pol2     | Blood        | Raji          | 0 | 0 | 0 | 478 | 534 | 534 | 534 | 515 | 77623 | 276 | 671309 | wgEncodeAv | ChIP | Raji     | Pol2 | 1     | 19732 |
| dms.bed | encode_tfbs | GATA-2   | Brain        | SH-SY5Y       | 0 | 0 | 0 | 478 | 534 | 534 | 534 | 515 | 11153 | 276 | 737779 | wgEncodeAv | ChIP | SH-SY5Y  | G    | 1     | 35620 |
| dms.bed | encode_tfbs | GATA3    | Brain        | SH-SY5Y       | 0 | 0 | 0 | 478 | 534 | 534 | 534 | 515 | 859   | 276 | 748073 | wgEncodeAv | ChIP | SH-SY5Y  | G    | 1     | 15879 |
| dms.bed | encode_tfbs | eGFP-FOS | Blood        | K562          | 0 | 0 | 0 | 478 | 534 | 534 | 534 | 515 | 3015  | 276 | 745917 | wgEncodeAv | ChIP | K562     | eGFI | 1     | 10256 |
| dms.bed | encode_tfbs | GATA2    | Blood        | K562          | 0 | 0 | 0 | 478 | 534 | 534 | 534 | 515 | 3179  | 276 | 745753 | wgEncodeAv | ChIP | K562     | eGFI | 1     | 11478 |
| dms.bed | encode_tfbs | HDAC8    | Blood        | K562          | 0 | 0 | 0 | 478 | 534 | 534 | 534 | 515 | 3249  | 276 | 745683 | wgEncodeAv | ChIP | K562     | eGFI | 1     | 1718  |
| dms.bed | encode_tfbs | Pol2     | Lung         | A549          | 0 | 0 | 0 | 478 | 534 | 534 | 534 | 515 | 60743 | 276 | 688189 | wgEncodeAv | ChIP | A549     | Pol2 | 1     | 17011 |
| dms.bed | encode_tfbs | CTCF     | Skin         | Fibrobl       | 0 | 0 | 0 | 478 | 534 | 534 | 534 | 515 | 29001 | 276 | 719931 | wgEncodeAv | ChIP | Fibrobl  | CT   | 1     | 45978 |
| dms.bed | encode_tfbs | Pol2     | Brain        | Gliobla       | 0 | 0 | 0 | 478 | 534 | 534 | 534 | 515 | 55542 | 276 | 693390 | wgEncodeAv | ChIP | Gliobla  | Pc   | 1     | 17417 |
| dms.bed | encode_tfbs | c-Myc    | Blood        | GM12878       | 0 | 0 | 0 | 478 | 534 | 534 | 534 | 515 | 25325 | 276 | 723607 | wgEncodeAv | ChIP | GM12878  | 1    | 3690  |       |
| dms.bed | encode_tfbs | Pol2     | Blood        | GM12878       | 0 | 0 | 0 | 478 | 534 | 534 | 534 | 515 | 60801 | 276 | 688131 | wgEncodeAv | ChIP | GM12878  | 1    | 14237 |       |
| dms.bed | encode_tfbs | c-Myc    | ESC          | H1-hESC       | 0 | 0 | 0 | 478 | 534 | 534 | 534 | 515 | 1066  | 276 | 747866 | wgEncodeAv | ChIP | H1-hESC  | c    | 1     | 1217  |
| dms.bed | encode_tfbs | Pol2     | ESC          | H1-hESC       | 0 | 0 | 0 | 478 | 534 | 534 | 534 | 515 | 62203 | 276 | 686729 | wgEncodeAv | ChIP | H1-hESC  | F    | 1     | 12915 |
| dms.bed | encode_tfbs | c-Myc    | Cervix       | HeLa-S3       | 0 | 0 | 0 | 478 | 534 | 534 | 534 | 515 | 6741  | 276 | 742191 | wgEncodeAv | ChIP | HeLa-S3  | c    | 1     | 2835  |
| dms.bed | encode_tfbs | CTCF     | Cervix       | HeLa-S3       | 0 | 0 | 0 | 478 | 534 | 534 | 534 | 515 | 15725 | 276 | 733207 | wgEncodeAv | ChIP | HeLa-S3  | C    | 1     | 58806 |
| dms.bed | encode_tfbs | c-Myc    | Liver        | HepG2         | 0 | 0 | 0 | 478 | 534 | 534 | 534 | 515 | 10287 | 276 | 738645 | wgEncodeAv | ChIP | HepG2    | c-I  | 1     | 4413  |
| dms.bed | encode_tfbs | CTCF     | Blood vessel | HUVEC         | 0 | 0 | 0 | 478 | 534 | 534 | 534 | 515 | 14036 | 276 | 734896 | wgEncodeAv | ChIP | HUVEC    | CT   | 1     | 44033 |
| dms.bed | encode_tfbs | Pol2     | Blood vessel | HUVEC         | 0 | 0 | 0 | 478 | 534 | 534 | 534 | 515 | 43411 | 276 | 705521 | wgEncodeAv | ChIP | HUVEC    | Po   | 1     | 17190 |
| dms.bed | encode_tfbs | c-Myc    | Blood        | K562          | 0 | 0 | 0 | 478 | 534 | 534 | 534 | 515 | 19373 | 276 | 729559 | wgEncodeAv | ChIP | K562     | c-M  | 1     | 11738 |
| dms.bed | encode_tfbs | Pol2     | Blood        | K562          | 0 | 0 | 0 | 478 | 534 | 534 | 534 | 515 | 65667 | 276 | 683265 | wgEncodeAv | ChIP | K562     | Pol2 | 1     | 19255 |
| dms.bed | encode_tfbs | c-Myc    | Breast       | MCF-7         | 0 | 0 | 0 | 478 | 534 | 534 | 534 | 515 | 10257 | 276 | 738675 | wgEncodeAv | ChIP | MCF-7    | c-N  | 1     | 6930  |
| dms.bed | encode_tfbs | Pol2     | Breast       | MCF-7         | 0 | 0 | 0 | 478 | 534 | 534 | 534 | 515 | 62378 | 276 | 686554 | wgEncodeAv | ChIP | MCF-7    | Po   | 1     | 19412 |
| dms.bed | encode_tfbs | Pol2     | Breast       | MCF-7         | 0 | 0 | 0 | 478 | 534 | 534 | 534 | 515 | 56138 | 276 | 692794 | wgEncodeAv | ChIP | MCF-7    | Po   | 1     | 16136 |
| dms.bed | encode_tfbs | CTCF     | Skin         | ProgFib       | 0 | 0 | 0 | 478 | 534 | 534 | 534 | 515 | 21861 | 276 | 727071 | wgEncodeAv | ChIP | ProgFib  | C    | 1     | 43918 |
| dms.bed | encode_tfbs | Pol2     | Skin         | ProgFib       | 0 | 0 | 0 | 478 | 534 | 534 | 534 | 515 | 61199 | 276 | 687733 | wgEncodeAv | ChIP | ProgFib  | Pc   | 1     | 16338 |
| dms.bed | encode_tfbs | CTCF     | Lung         | AG04450       | 0 | 0 | 0 | 478 | 534 | 534 | 534 | 515 | 26245 | 276 | 722687 | wgEncodeAv | ChIP | AG04450  | 1    | 46500 |       |
| dms.bed | encode_tfbs | CTCF     | Gingival     | AG09319       | 0 | 0 | 0 | 478 | 534 | 534 | 534 | 515 | 29897 | 276 | 719035 | wgEncodeAv | ChIP | AG09319  | 1    | 49675 |       |
| dms.bed | encode_tfbs | CTCF     | Skin         | AG10803       | 0 | 0 | 0 | 478 | 534 | 534 | 534 | 515 | 22387 | 276 | 726545 | wgEncodeAv | ChIP | AG10803  | 1    | 47656 |       |

|         |             |      |              |            |   |   |   |     |     |     |     |     |       |     |        |            |      |           |      |   |       |
|---------|-------------|------|--------------|------------|---|---|---|-----|-----|-----|-----|-----|-------|-----|--------|------------|------|-----------|------|---|-------|
| dms.bed | encode_tfbs | CTCF | Blood vessel | AoAF       | 0 | 0 | 0 | 478 | 534 | 534 | 534 | 515 | 21048 | 276 | 727884 | wgEncodeAv | ChIP | AoAF      | CTC  | 1 | 45960 |
| dms.bed | encode_tfbs | CTCF | Brain        | BE2_C      | 0 | 0 | 0 | 478 | 534 | 534 | 534 | 515 | 25341 | 276 | 723591 | wgEncodeAv | ChIP | BE2_C     | CTC  | 1 | 54655 |
| dms.bed | encode_tfbs | CTCF | Skin         | BJ         | 0 | 0 | 0 | 478 | 534 | 534 | 534 | 515 | 30329 | 276 | 718603 | wgEncodeAv | ChIP | BJ        | CTCF | 1 | 44668 |
| dms.bed | encode_tfbs | CTCF | Blood        | GM12801    | 0 | 0 | 0 | 478 | 534 | 534 | 534 | 515 | 1384  | 276 | 747548 | wgEncodeAv | ChIP | GM12801   |      | 1 | 2883  |
| dms.bed | encode_tfbs | CTCF | Blood        | GM12874    | 0 | 0 | 0 | 478 | 534 | 534 | 534 | 515 | 22832 | 276 | 726100 | wgEncodeAv | ChIP | GM12874   |      | 1 | 37517 |
| dms.bed | encode_tfbs | CTCF | Blood        | GM12875    | 0 | 0 | 0 | 478 | 534 | 534 | 534 | 515 | 23356 | 276 | 725576 | wgEncodeAv | ChIP | GM12875   |      | 1 | 39184 |
| dms.bed | encode_tfbs | CTCF | Blood        | GM12878    | 0 | 0 | 0 | 478 | 534 | 534 | 534 | 515 | 21125 | 276 | 727807 | wgEncodeAv | ChIP | GM12878   |      | 1 | 40122 |
| dms.bed | encode_tfbs | CTCF | Cerebellum   | HAc        | 0 | 0 | 0 | 478 | 534 | 534 | 534 | 515 | 29823 | 276 | 719109 | wgEncodeAv | ChIP | HAc       | CTCF | 1 | 45591 |
| dms.bed | encode_tfbs | CTCF | Spinal cord  | HA-sp      | 0 | 0 | 0 | 478 | 534 | 534 | 534 | 515 | 23898 | 276 | 725034 | wgEncodeAv | ChIP | HA-sp     | CTC  | 1 | 46546 |
| dms.bed | encode_tfbs | CTCF | Heart        | HCM        | 0 | 0 | 0 | 478 | 534 | 534 | 534 | 515 | 36843 | 276 | 712089 | wgEncodeAv | ChIP | HCM       | CTCF | 1 | 50703 |
| dms.bed | encode_tfbs | CTCF | Colon        | HCT-116    | 0 | 0 | 0 | 478 | 534 | 534 | 534 | 515 | 21528 | 276 | 727404 | wgEncodeAv | ChIP | HCT-116   | C    | 1 | 50294 |
| dms.bed | encode_tfbs | CTCF | Cervix       | HeLa-S3    | 0 | 0 | 0 | 478 | 534 | 534 | 534 | 515 | 16413 | 276 | 732519 | wgEncodeAv | ChIP | HeLa-S3   | C    | 1 | 38400 |
| dms.bed | encode_tfbs | CTCF | Skin         | HFF        | 0 | 0 | 0 | 478 | 534 | 534 | 534 | 515 | 20068 | 276 | 728864 | wgEncodeAv | ChIP | HFF       | CTCF | 1 | 34889 |
| dms.bed | encode_tfbs | CTCF | Skin         | HFF-Myc    | 0 | 0 | 0 | 478 | 534 | 534 | 534 | 515 | 27541 | 276 | 721391 | wgEncodeAv | ChIP | HFF-Myc   | C    | 1 | 43821 |
| dms.bed | encode_tfbs | CTCF | Blood        | HL-60      | 0 | 0 | 0 | 478 | 534 | 534 | 534 | 515 | 8526  | 276 | 740406 | wgEncodeAv | ChIP | HL-60     | CTC  | 1 | 16683 |
| dms.bed | encode_tfbs | CTCF | Blood vessel | HPAF       | 0 | 0 | 0 | 478 | 534 | 534 | 534 | 515 | 28327 | 276 | 720605 | wgEncodeAv | ChIP | HPAF      | CTC  | 1 | 56686 |
| dms.bed | encode_tfbs | CTCF | Lung         | HPF        | 0 | 0 | 0 | 478 | 534 | 534 | 534 | 515 | 22897 | 276 | 726035 | wgEncodeAv | ChIP | HPF       | CTCF | 1 | 46150 |
| dms.bed | encode_tfbs | CTCF | Kidney       | HRE        | 0 | 0 | 0 | 478 | 534 | 534 | 534 | 515 | 22928 | 276 | 726004 | wgEncodeAv | ChIP | HRE       | CTCF | 1 | 42295 |
| dms.bed | encode_tfbs | CTCF | Blood vessel | HUVEC      | 0 | 0 | 0 | 478 | 534 | 534 | 534 | 515 | 25385 | 276 | 723547 | wgEncodeAv | ChIP | HUVEC     | CT   | 1 | 37920 |
| dms.bed | encode_tfbs | CTCF | Placenta     | HVMF       | 0 | 0 | 0 | 478 | 534 | 534 | 534 | 515 | 26355 | 276 | 722577 | wgEncodeAv | ChIP | HVMF      | CTC  | 1 | 46460 |
| dms.bed | encode_tfbs | CTCF | Blood        | NB4        | 0 | 0 | 0 | 478 | 534 | 534 | 534 | 515 | 16374 | 276 | 732558 | wgEncodeAv | ChIP | NB4       | CTCF | 1 | 38253 |
| dms.bed | encode_tfbs | CTCF | Skin         | NHDF-neo   | 0 | 0 | 0 | 478 | 534 | 534 | 534 | 515 | 27938 | 276 | 720994 | wgEncodeAv | ChIP | NHDF-nec  |      | 1 | 45920 |
| dms.bed | encode_tfbs | CTCF | Lung         | NHLF       | 0 | 0 | 0 | 478 | 534 | 534 | 534 | 515 | 21642 | 276 | 727290 | wgEncodeAv | ChIP | NHLF      | CTC  | 1 | 35446 |
| dms.bed | encode_tfbs | CTCF | Brain        | SK-N-SH_RA | 0 | 0 | 0 | 478 | 534 | 534 | 534 | 515 | 28125 | 276 | 720807 | wgEncodeAv | ChIP | SK-N-SH_f |      | 1 | 46232 |
| dms.bed | encode_tfbs | CTCF | Lung         | WI-38      | 0 | 0 | 0 | 478 | 534 | 534 | 534 | 515 | 21501 | 276 | 727431 | wgEncodeAv | ChIP | WI-38     | CTC  | 1 | 31518 |

**Table S5. Blueprint data included in the cell type specific DNA methylation**

| CELL_TYPE                    | MARKERS                  | DONOR_ID | DONOR_AGE | DONOR_SEX | BIOMATERIAL_PROVIDER            | USED_FOR_CELLULAR_Q<br>UANTIFICATION |
|------------------------------|--------------------------|----------|-----------|-----------|---------------------------------|--------------------------------------|
| Band neutrophils             | CD11b+/CD16dim           | BM030613 | 65 - 70   | Male      | Sanquin Amsterdam               | NO                                   |
| Band neutrophils             | CD11b+/CD16dim           | BM060814 | 80 - 85   | Female    | Sanquin Amsterdam               | NO                                   |
| Band neutrophils             | CD11b+/CD16dim           | BM190913 | 70 - 75   | Female    | Sanquin Amsterdam               | NO                                   |
| CD4+ naïve T cells           | CD3+CD4+CD45RA+          | 5.2      | 50 - 55   | Male      | Queen Mary University of London | YES                                  |
| CD4+ naïve T cells           | CD3+CD4+CD45RA+          | 145.2    | 40 - 45   | Female    | Queen Mary University of London | YES                                  |
| CD4+ naïve T cells           | CD3+CD4+CD45RA+          | 299.2    | 35 - 40   | Male      | Queen Mary University of London | YES                                  |
| CD4+ naïve T cells           | CD3+CD4+CD45RA+          | 329.2    | 70 - 75   | Female    | Queen Mary University of London | YES                                  |
| CD4+ central memory T cells  | CD3+ CD4+ CD45RA- CD62+  | S006YC   | 65 - 70   | Female    | NIHR Cambridge BioResource      | YES                                  |
| CD4+ central memory T cells  | CD3+ CD4+ CD45RA- CD62+  | S014QS   | 55 - 60   | Male      | NIHR Cambridge BioResource      | NO                                   |
| CD4+ effector memory T cells | CD3+ CD4+ CD45RA- CD62-  | S001U3   | 40 - 45   | Female    | NIHR Cambridge BioResource      | YES                                  |
| CD4+ effector memory T cells | CD3+ CD4+ CD45RA- CD62-  | S014QS   | 55 - 60   | Male      | NIHR Cambridge BioResource      | YES                                  |
| CD4+ naïve T cells           | CD3+CD4+CD45RA+          | S007DD   | 50 - 55   | Female    | NIHR Cambridge BioResource      | YES                                  |
| CD4+ naïve T cells           | CD3+CD4+CD45RA+          | S008H1   | 50 - 55   | Male      | NIHR Cambridge BioResource      | YES                                  |
| CD4+ naïve T cells           | CD3+CD4+CD45RA+          | S009W4   | 45 - 50   | Female    | NIHR Cambridge BioResource      | YES                                  |
| CD8+ naïve T cells           | CD3+CD8+CD45RA+          | S002ND   | 60 - 65   | Male      | NIHR Cambridge BioResource      | YES                                  |
| CD8+ naïve T cells           | CD3+CD8+CD45RA+          | S0164R   | 65 - 70   | Female    | NIHR Cambridge BioResource      | YES                                  |
| CD8+ effector memory T cells | CD3+ CD8+ CD62L- CD45RA- | S014WG   | 65 - 70   | Female    | NIHR Cambridge BioResource      | YES                                  |
| CD8+ central memory T cells  | CD3+ CD8+ CD62L+ CD45RA- | C003VO   | 65 - 70   | Female    | NIHR Cambridge BioResource      | NO                                   |
| CD8+ central memory T cells  | CD3+ CD8+ CD62L+ CD45RA- | C005UI   | 55 - 60   | Male      | NIHR Cambridge BioResource      | YES                                  |
| CD8+ effector memory T cells | CD3+ CD8+ CD62L- CD45RA- | C00256   | 40 - 45   | Male      | NIHR Cambridge BioResource      | YES                                  |
| CD8+ effector memory T cells | CD3+ CD8+ CD62L- CD45RA- | S014WG   | 65 - 70   | Female    | NIHR Cambridge BioResource      | YES                                  |
| CD8+ naïve T cells           | CD3+CD8+CD45RA+          | C00256   | 40 - 45   | Male      | NIHR Cambridge BioResource      | YES                                  |
| CD8+ naïve T cells           | CD3+CD8+CD45RA+          | C003VO   | 65 - 70   | Female    | NIHR Cambridge BioResource      | YES                                  |
| class-switch memory B cells  | CD19+ CD27- IgD-         | C003JB   | 55 - 60   | Male      | NIHR Cambridge BioResource      | NO                                   |
| class-switch memory B cells  | CD19+ CD27+ IgA+ IgG+    | NC11_41  | 60 - 65   | Female    | Jose I. Martin-Subero           | NO                                   |
| Mature neutrophils           | CD66b+CD16+              | C00055   | 65 - 70   | Male      | NIHR Cambridge BioResource      | YES                                  |
| Mature neutrophils           | CD66b+CD16+              | C0010K   | 60 - 65   | Female    | NIHR Cambridge BioResource      | YES                                  |
| Mature neutrophils           | CD66b+CD16+              | C0011I   | 50 - 55   | Female    | NIHR Cambridge BioResource      | YES                                  |
| Mature neutrophils           | CD66b+CD16+              | C001UY   | 60 - 65   | Male      | NIHR Cambridge BioResource      | YES                                  |
| Mature neutrophils           | CD66b+CD16+              | PB100713 | 55 - 60   | Male      | Sanquin Amsterdam               | YES                                  |
| Mature neutrophils           | CD66b+CD16+              | PB270313 | 70 - 75   | Male      | Sanquin Amsterdam               | YES                                  |
| Mature neutrophils           | CD66b+CD16+              | PB130513 | 30 - 35   | Male      | Sanquin Amsterdam               | YES                                  |
| memory B cells               | CD19+ CD27+ IgD+         | C003N3   | 50 - 55   | Male      | NIHR Cambridge BioResource      | NO                                   |
| memory B cells               | CD19+ CD27+ IgD+         | S017RE   | 50 - 55   | Female    | NIHR Cambridge BioResource      | NO                                   |
| Monocytes                    | CD14+CD16-               | C00055   | 65 - 70   | Male      | NIHR Cambridge BioResource      | YES                                  |
| Monocytes                    | CD14+CD16-               | C0010K   | 60 - 65   | Female    | NIHR Cambridge BioResource      | YES                                  |
| Monocytes                    | CD14+CD16-               | C001UY   | 60 - 65   | Male      | NIHR Cambridge BioResource      | YES                                  |
| Monocytes                    | CD14+CD16-               | C004SQ   | 60 - 65   | Female    | NIHR Cambridge BioResource      | YES                                  |
| naïve B cells                | CD19+ CD27- IgD+         | NC11_41  | 60 - 65   | Female    | Jose I. Martin-Subero           | YES                                  |
| naïve B cells                | CD19+ CD27- IgD+         | NC11_83  | 45 - 50   | Female    | Jose I. Martin-Subero           | YES                                  |
| naïve B cells                | CD19+ CD27- IgD+         | NC15_72  | 60 - 65   | Female    | Jose I. Martin-Subero           | YES                                  |

|               |                    |        |         |        |                            |     |
|---------------|--------------------|--------|---------|--------|----------------------------|-----|
| naïve B cells | CD19+ CD27- IgD+   | S001JP | 70 - 75 | Female | NIHR Cambridge BioResource | NO  |
| naïve B cells | CD19+ CD27- IgD+   | S00DM8 | 50 - 55 | Male   | NIHR Cambridge BioResource | NO  |
| NK cells      | CD3- CD56+ CD16dim | C002CT | 50 - 55 | Male   | NIHR Cambridge BioResource | YES |
| NK cells      | CD3- CD56+ CD16dim | C006G5 | 70 - 75 | Female | NIHR Cambridge BioResource | YES |















chr20 57460352 57460472 1 + GCACTTCTCTGGGCTCTGGCTCTGGCTGAGTAAAGAGGACACACGCAACCTTGTGGCTGGCCAGGAGGCCACAGCGCTCATTTAGACAGAGAACCTGAGCCGGAC









**Table S7 Genotype association with race group and disease status**

| Site            | Contingency table_race                                                                      | p_value_race | p_adj_race | Contingency table_disease                                       | p_value_disease | p_adj_disease |
|-----------------|---------------------------------------------------------------------------------------------|--------------|------------|-----------------------------------------------------------------|-----------------|---------------|
| chr1:1206612    | {African_American: {GG: 66, AG: 1}, Not_African_American: {GG: 61}}                         | 1            | 1          | {ARMB: {GG: 59}, APMB: {GG: 68, AG: 1}}                         | 1               | 1             |
| chr1:1755633    | {African_American: {CC: 67}, Not_African_American: {CC: 59, CT: 1}}                         | 0.47244094   | 0.90275544 | {ARMB: {CC: 59}, APMB: {CC: 67, CT: 1}}                         | 0.232685078     | 0.4609375     |
| chr1:1947645    | {African_American: {CC: 43, CT: 18, TT: 2}, Not_African_American: {CT: 25, TT: 17, CC: 12}} | 1.06233E-07  | 1.3717E-05 | {ARMB: {CC: 27, CT: 20, TT: 5}, APMB: {CC: 28, CT: 23, TT: 14}} | 1               | 1             |
| chr1:2425928    | {African_American: {CC: 66}, Not_African_American: {CC: 57, CT: 1}}                         | 0.46774194   | 0.90275544 | {ARMB: {CC: 57, CT: 1}, APMB: {CC: 66}}                         | 0.467741935     | 1             |
| chr1:2425979    | {African_American: {CC: 50, TT: 5, CT: 3}, Not_African_American: {CC: 61}}                  | 0.00244413   | 0.06305862 | {ARMB: {CC: 47, TT: 4, CT: 2}, APMB: {CC: 64, CT: 1, TT: 1}}    | 0.230055514     | 1             |
| chr1:2426036    | {African_American: {CC: 66, CT: 1}, Not_African_American: {CC: 60}}                         | 1            | 1          | {ARMB: {CC: 57, CT: 1}, APMB: {CC: 69}}                         | 0.456692913     | 1             |
| chr1:2590917    | {African_American: {GG: 66, AG: 1}, Not_African_American: {GG: 61}}                         | 1            | 1          | {ARMB: {GG: 58, AG: 1}, APMB: {GG: 69}}                         | 0.4609375       | 1             |
| chr1:2590953    | {African_American: {GG: 53, AG: 1}, Not_African_American: {GG: 30, AG: 18, AA: 8}}          | 0.00016273   | 0.0083971  | {ARMB: {GG: 40, AG: 13, AA: 2}, APMB: {GG: 43, AG: 16, AA: 6}}  | 0.482105981     | 1             |
| chr1:3167258    | {African_American: {GG: 65, AG: 2}, Not_African_American: {GG: 61}}                         | 0.49717028   | 0.90275544 | {ARMB: {GG: 59}, APMB: {GG: 67, AG: 2}}                         | 0.49913878      | 1             |
| chr1:3167371    | {African_American: {CC: 62, CT: 3}, Not_African_American: {CC: 57, CT: 3}}                  | 1            | 1          | {ARMB: {CC: 56, CT: 2}, APMB: {CC: 63, CT: 4}}                  | 0.684870029     | 1             |
| chr1:3556710    | {African_American: {GG: 66, AG: 1}, Not_African_American: {GG: 61}}                         | 1            | 1          | {ARMB: {GG: 59}, APMB: {GG: 68, AG: 1}}                         | 1               | 1             |
| chr1:3947941    | {African_American: {GG: 62, AG: 1}, Not_African_American: {GG: 61}}                         | 1            | 1          | {ARMB: {GG: 57, AG: 1}, APMB: {GG: 66}}                         | 0.467741935     | 1             |
| chr1:3947989    | {African_American: {AA: 66, AG: 1}, Not_African_American: {AA: 61}}                         | 1            | 1          | {ARMB: {AA: 59}, APMB: {AA: 68, AG: 1}}                         | 1               | 1             |
| chr1:3948000    | {African_American: {CC: 66}, Not_African_American: {CC: 60, CT: 1}}                         | 0.48031496   | 0.90275544 | {ARMB: {CC: 57, CT: 1}, APMB: {CC: 69}}                         | 0.456692913     | 1             |
| chr1:3948021    | {African_American: {CC: 66, CT: 1}, Not_African_American: {CC: 61}}                         | 1            | 1          | {ARMB: {CC: 59}, APMB: {CC: 68, CT: 1}}                         | 1               | 1             |
| chr1:4058749    | {African_American: {AA: 63}, Not_African_American: {AA: 60, AG: 1}}                         | 0.49193548   | 0.90275544 | {ARMB: {AA: 55, AG: 1}, APMB: {AA: 68}}                         | 0.451612903     | 1             |
| chr1:4058949    | {African_American: {GG: 63}, Not_African_American: {GG: 59, AG: 1}}                         | 0.48780488   | 0.90275544 | {ARMB: {GG: 56}, APMB: {GG: 66, AG: 1}}                         | 1               | 1             |
| chr1:5503351    | {African_American: {GG: 66, AG: 1}, Not_African_American: {GG: 61}}                         | 1            | 1          | {ARMB: {GG: 58, AG: 1}, APMB: {GG: 69}}                         | 0.4609375       | 1             |
| chr1:5503359    | {African_American: {AA: 55, CC: 1}, Not_African_American: {AA: 61}}                         | 0.47863248   | 0.90275544 | {ARMB: {AA: 54}, APMB: {AA: 62, CC: 1}}                         | 1               | 1             |
| chr1:5503393    | {African_American: {AA: 67}, Not_African_American: {AA: 59, AG: 1}}                         | 0.47244094   | 0.90275544 | {ARMB: {AA: 58}, APMB: {AA: 68, AG: 1}}                         | 1               | 1             |
| chr1:5503406    | {African_American: {AA: 62, CC: 2}, Not_African_American: {AA: 60}}                         | 0.49645948   | 0.90275544 | {ARMB: {AA: 57}, APMB: {AA: 65, CC: 2}}                         | 0.499213218     | 1             |
| chr1:5503412    | {African_American: {TT: 67}, Not_African_American: {TT: 60, AA: 1}}                         | 0.4765625    | 0.90275544 | {ARMB: {TT: 58, AA: 1}, APMB: {TT: 69}}                         | 1               | 1             |
| chr1:5651315    | {African_American: {CC: 64, CT: 1}, Not_African_American: {CC: 59, CT: 1}}                  | 1            | 1          | {ARMB: {CC: 56, CT: 2}, APMB: {CC: 67}}                         | 0.213290323     | 1             |
| chr1:5651322    | {African_American: {AA: 57, CC: 1}, Not_African_American: {AA: 61}}                         | 0.48739496   | 0.90275544 | {ARMB: {AA: 56, CC: 1}, APMB: {AA: 62}}                         | 0.478991597     | 1             |
| chr1:5651350    | {African_American: {GG: 63, AG: 2}, Not_African_American: {GG: 59, AG: 1}}                  | 1            | 1          | {ARMB: {GG: 56, AG: 1}, APMB: {GG: 66, AG: 2}}                  | 1               | 1             |
| chr1:9233320    | {African_American: {GG: 64, AG: 2}, Not_African_American: {GG: 61}}                         | 0.4968129    | 0.90275544 | {ARMB: {GG: 58, AG: 1}, APMB: {GG: 67, AG: 1}}                  | 1               | 1             |
| chr1:10642683   | {African_American: {GG: 62, AG: 4}, Not_African_American: {GG: 61}}                         | 0.12023416   | 0.81817066 | {ARMB: {GG: 57, AG: 2}, APMB: {GG: 66, AG: 2}}                  | 1               | 1             |
| chr1:10642757   | {African_American: {GG: 58, AG: 6}, Not_African_American: {GG: 41, AG: 13, AA: 3}}          | 0.01131093   | 0.16835887 | {ARMB: {GG: 39, AG: 14, AA: 2}, APMB: {GG: 60, AG: 5, AA: 1}}   | 0.012944885     | 1             |
| chr1:11964094   | {African_American: {TT: 65}, Not_African_American: {TT: 58, CT: 1}}                         | 0.47580645   | 0.90275544 | {ARMB: {TT: 59}, APMB: {TT: 64, CT: 1}}                         | 1               | 1             |
| chr1:12035077   | {African_American: {CC: 61, CT: 4}, Not_African_American: {CC: 61}}                         | 0.1197802    | 0.81817066 | {ARMB: {CC: 57, CT: 1}, APMB: {CC: 65, CT: 3}}                  | 0.623789892     | 1             |
| chr1:14949963   | {African_American: {CC: 65, CT: 2}, Not_African_American: {CC: 61}}                         | 0.49717028   | 0.90275544 | {ARMB: {CC: 59}, APMB: {CC: 67, CT: 2}}                         | 0.49913878      | 1             |
| chr1:14950030   | {African_American: {TT: 54, CT: 10}, Not_African_American: {TT: 48, CT: 7, CC: 1}}          | 0.61033653   | 1          | {ARMB: {TT: 46, CT: 8, CC: 1}, APMB: {TT: 56, CT: 9}}           | 0.786437201     | 1             |
| chr1:17394880   | {African_American: {GG: 66, AG: 1}, Not_African_American: {GG: 61}}                         | 1            | 1          | {ARMB: {GG: 58, AG: 1}, APMB: {GG: 69}}                         | 0.4609375       | 1             |
| chr1:17394911   | {African_American: {CC: 66, CT: 1}, Not_African_American: {CC: 55, CT: 2}}                  | 0.59362384   | 1          | {ARMB: {CC: 58}, APMB: {CC: 63, CT: 3}}                         | 0.247049567     | 1             |
| chr1:19920383   | {African_American: {CC: 58, CT: 7, TT: 1}, Not_African_American: {CC: 52, CT: 6, TT: 1}}    | 1            | 1          | {ARMB: {CC: 56, CT: 3}, APMB: {CC: 54, CT: 10, TT: 2}}          | 0.059432617     | 1             |
| chr1:19920451   | {African_American: {TT: 67}, Not_African_American: {TT: 60, CT: 1}}                         | 0.4765625    | 0.90275544 | {ARMB: {TT: 59}, APMB: {TT: 68, CT: 1}}                         | 1               | 1             |
| chr1:20409984   | {African_American: {TT: 66}, Not_African_American: {TT: 59, CT: 1}}                         | 0.47619048   | 0.90275544 | {ARMB: {TT: 58}, APMB: {TT: 67, CT: 1}}                         | 1               | 1             |
| chr1:20409995   | {African_American: {GG: 65, AG: 1}, Not_African_American: {GG: 61}}                         | 1            | 1          | {ARMB: {GG: 58, AG: 1}, APMB: {GG: 68}}                         | 0.464566929     | 1             |
| chr1:20410040   | {African_American: {GG: 61, AG: 3, AA: 1}, Not_African_American: {GG: 61}}                  | 0.2447619    | 0.90275544 | {ARMB: {GG: 55, AG: 2, AA: 1}, APMB: {GG: 67, AG: 1}}           | 0.405984079     | 1             |
| chr1:22001714   | {African_American: {GG: 48, AG: 7, AA: 5}, Not_African_American: {GG: 58}}                  | 0.00026854   | 0.01222668 | {ARMB: {GG: 52, AA: 3, AG: 1}, APMB: {GG: 54, AG: 6, AA: 2}}    | 0.164137795     | 1             |
| chr1:22001817   | {African_American: {TT: 67}, Not_African_American: {TT: 60, CT: 1}}                         | 0.4765625    | 0.90275544 | {ARMB: {TT: 59}, APMB: {TT: 68, CT: 1}}                         | 1               | 1             |
| chr1:23559546   | {African_American: {GG: 67}, Not_African_American: {GG: 59, AG: 1}}                         | 0.47244094   | 0.90275544 | {ARMB: {GG: 57, AG: 1}, APMB: {GG: 69}}                         | 0.456692913     | 1             |
| chr1:26282856   | {African_American: {GG: 66, AG: 1}, Not_African_American: {GG: 61}}                         | 1            | 1          | {ARMB: {GG: 59}, APMB: {GG: 68, AG: 1}}                         | 1               | 1             |
| chr1:38836233   | {African_American: {GG: 67}, Not_African_American: {GG: 60, AG: 1}}                         | 0.4765625    | 0.90275544 | {ARMB: {GG: 59}, APMB: {GG: 68, AG: 1}}                         | 1               | 1             |
| chr1:42036013   | {African_American: {AA: 65}, Not_African_American: {AA: 59, AG: 1}}                         | 0.48         | 0.90275544 | {ARMB: {AA: 59}, APMB: {AA: 65, AG: 1}}                         | 1               | 1             |
| chr1:53071632   | {African_American: {AA: 66, AG: 1}, Not_African_American: {AA: 61}}                         | 1            | 1          | {ARMB: {AA: 59}, APMB: {AA: 68, AG: 1}}                         | 1               | 1             |
| chr1:58814457   | {African_American: {GG: 63, AG: 3}, Not_African_American: {GG: 61}}                         | 0.24521935   | 0.90275544 | {ARMB: {GG: 58, AG: 1}, APMB: {GG: 66, AG: 2}}                  | 1               | 1             |
| chr1:77351121   | {African_American: {CC: 55, CT: 11}, Not_African_American: {CC: 41, CT: 9, TT: 3}}          | 0.18342587   | 0.90275544 | {ARMB: {CC: 41, CT: 13, TT: 1}, APMB: {CC: 55, CT: 7, TT: 2}}   | 0.15732937      | 1             |
| chr1:77351129   | {African_American: {CC: 63, CT: 4}, Not_African_American: {CC: 57, CT: 2}}                  | 0.68379816   | 1          | {ARMB: {CC: 56, CT: 2}, APMB: {CC: 64, CT: 4}}                  | 0.686024351     | 1             |
| chr1:89088805   | {African_American: {TT: 66, CT: 1}, Not_African_American: {TT: 61}}                         | 1            | 1          | {ARMB: {TT: 59}, APMB: {TT: 68, CT: 1}}                         | 1               | 1             |
| chr1:116982887  | {African_American: {GG: 66, AG: 1}, Not_African_American: {GG: 61}}                         | 1            | 1          | {ARMB: {GG: 58, AG: 1}, APMB: {GG: 69}}                         | 0.4609375       | 1             |
| chr1:116982906  | {African_American: {AA: 65, AG: 1}, Not_African_American: {AA: 61}}                         | 1            | 1          | {ARMB: {AA: 57, AG: 1}, APMB: {AA: 69}}                         | 0.456692913     | 1             |
| chr1:154321061  | {African_American: {TT: 66, AA: 1}, Not_African_American: {TT: 61}}                         | 1            | 1          | {ARMB: {TT: 59}, APMB: {TT: 68, AA: 1}}                         | 1               | 1             |
| chr1:154321155  | {African_American: {CC: 66, GG: 1}, Not_African_American: {CC: 61}}                         | 1            | 1          | {ARMB: {CC: 58, GG: 1}, APMB: {CC: 69}}                         | 0.4609375       | 1             |
| chr1:163885674  | {African_American: {TT: 37, CT: 16, CC: 8}, Not_African_American: {TT: 25, CT: 19, CC: 11}} | 0.25431068   | 0.90275544 | {ARMB: {TT: 32, CT: 18, CC: 5}, APMB: {TT: 30, CT: 17, CC: 14}} | 0.143170203     | 1             |
| chr1:177964370  | {African_American: {CC: 59, CT: 7}, Not_African_American: {CC: 35, CT: 17, TT: 1}}          | 0.00355201   | 0.07610248 | {ARMB: {CC: 47, CT: 9}, APMB: {CC: 47, CT: 15, TT: 1}}          | 0.3626157       | 1             |
| chr1:200916181  | {African_American: {CC: 67}, Not_African_American: {CC: 60, CT: 1}}                         | 0.4765625    | 0.90275544 | {ARMB: {CC: 58, CT: 1}, APMB: {CC: 69}}                         | 0.4609375       | 1             |
| chr1:201889751  | {African_American: {AA: 64, AG: 2}, Not_African_American: {AA: 61}}                         | 0.4968129    | 0.90275544 | {ARMB: {AA: 56, AG: 2}, APMB: {AA: 69}}                         | 0.206591975     | 1             |
| chr1:206797125  | {African_American: {CC: 62, CT: 3}, Not_African_American: {CC: 55, CT: 2}}                  | 1            | 1          | {ARMB: {CC: 54, CT: 3}, APMB: {CC: 63, CT: 2}}                  | 0.663688787     | 1             |
| chr1:228211004  | {African_American: {TT: 64}, Not_African_American: {TT: 56, CT: 1}}                         | 0.47107438   | 0.90275544 | {ARMB: {TT: 53}, APMB: {TT: 67, CT: 1}}                         | 1               | 1             |
| chr1:228211011  | {African_American: {GG: 67}, Not_African_American: {GG: 60, AG: 1}}                         | 0.4765625    | 0.90275544 | {ARMB: {GG: 59}, APMB: {GG: 68, AG: 1}}                         | 1               | 1             |
| chr1:228211012  | {African_American: {CC: 62, CT: 1}, Not_African_American: {CC: 54}}                         | 1            | 1          | {ARMB: {CC: 58}, APMB: {CC: 58, CT: 1}}                         | 1               | 1             |
| chr1:232531693  | {African_American: {CC: 65, CT: 1}, Not_African_American: {CC: 60, CT: 1}}                  | 1            | 1          | {ARMB: {CC: 56, CT: 2}, APMB: {CC: 69}}                         | 0.206599175     | 1             |
| chr1:232531865  | {African_American: {GG: 66, AG: 1}, Not_African_American: {GG: 61}}                         | 1            | 1          | {ARMB: {GG: 59}, APMB: {GG: 68, AG: 1}}                         | 1               | 1             |
| chr10:3514933   | {African_American: {CC: 55, CT: 7}, Not_African_American: {CC: 47, CT: 9, TT: 1}}           | 0.50518176   | 0.91357636 | {ARMB: {CC: 43, CT: 10}, APMB: {CC: 59, CT: 6, TT: 1}}          | 0.175862898     | 1             |
| chr10:3515072   | {African_American: {AA: 66, AG: 1}, Not_African_American: {AA: 61}}                         | 1            | 1          | {ARMB: {AA: 59}, APMB: {AA: 68, AG: 1}}                         | 1               | 1             |
| chr10:6215680   | {African_American: {AA: 58, AG: 3}, Not_African_American: {AA: 60}}                         | 0.24380165   | 0.90275544 | {ARMB: {AA: 52, AG: 2}, APMB: {AA: 66, AG: 1}}                  | 0.585408709     | 1             |
| chr10:8054672   | {African_American: {CC: 67}, Not_African_American: {CC: 60, AA: 1}}                         | 0.4765625    | 0.90275544 | {ARMB: {CC: 58, AA: 1}, APMB: {CC: 69}}                         | 0.4609375       | 1             |
| chr10:34815327  | {African_American: {GG: 66, AG: 1}, Not_African_American: {GG: 61}}                         | 1            | 1          | {ARMB: {GG: 58, AG: 1}, APMB: {GG: 69}}                         | 0.4609375       | 1             |
| chr10:60944248  | {African_American: {GG: 66}, Not_African_American: {GG: 60, AG: 1}}                         | 0.48031496   | 0.90275544 | {ARMB: {GG: 59}, APMB: {GG: 67, AG: 1}}                         | 1               | 1             |
| chr10:60944256  | {African_American: {GG: 64, AG: 2}, Not_African_American: {GG: 61}}                         | 0.4968129    | 0.90275544 | {ARMB: {GG: 58}, APMB: {GG: 67, AG: 2}}                         | 0.499812523     | 1             |
| chr10:70905567  | {African_American: {GG: 66, AG: 1}, Not_African_American: {GG: 61}}                         | 1            | 1          | {ARMB: {GG: 58, AG: 1}, APMB: {GG: 69}}                         | 0.4609375       | 1             |
| chr10:75108121  | {African_American: {CC: 65, CT: 1}, Not_African_American: {CC: 61}}                         | 1            | 1          | {ARMB: {CC: 59}, APMB: {CC: 67, CT: 1}}                         | 1               | 1             |
| chr10:75108169  | {African_American: {TT: 66, CT: 1}, Not_African_American: {TT: 61}}                         | 1            | 1          | {ARMB: {TT: 59}, APMB: {TT: 68, CT: 1}}                         | 1               | 1             |
| chr10:10103700  | {African_American: {GG: 65, AG: 1}, Not_African_American: {GG: 61}}                         | 1            | 1          | {ARMB: {GG: 59}, APMB: {GG: 67, AG: 1}}                         | 1               | 1             |
| chr10:113590831 | {African_American: {GG: 66, AG: 1}, Not_African_American: {GG: 61}}                         | 1            | 1          | {ARMB: {GG: 59}, APMB: {GG: 68, AG: 1}}                         | 1               | 1             |
| chr10:11965131  | {African_American: {CC: 60, CT: 2}, Not_African_American: {CC: 60}}                         | 0.49600325   | 0.90275544 | {ARMB: {CC: 54, CT: 1}, APMB: {CC: 66, CT: 1}}                  | 1               | 1             |
| chr10:11965140  | {African_American: {CC: 55, CT: 1}, Not_African_American: {CC: 60}}                         | 1            | 1          | {ARMB: {CC: 58, CT: 1}, APMB: {CC: 68}}                         | 0.464566929     | 1             |
| chr11:441948    | {African_American: {AA: 63, AG: 2}, Not_African_American: {AA: 59, AG: 2}}                  | 1            | 1          | {ARMB: {AA: 56, AG: 2}, APMB: {AA: 66, AG: 2}}                  | 1               | 1             |
| chr11:441987    | {African_American: {GG: 66, AG: 1}, Not_African_American: {GG: 61}}                         | 1            | 1          | {ARMB: {GG: 59}, APMB: {GG: 68, AG: 1}}                         | 1               | 1             |
| chr11:535603    | {African_American: {GG: 66, AG: 1}, Not_African_American: {GG: 54, AG: 2, AA: 1}}           | 0.40554892   | 0.90275544 | {ARMB: {GG: 56, AG: 2}, APMB: {GG: 64, AA: 1, AG: 1}}           | 0.787815079     | 1             |
| chr11:1229429   | {African_American: {GG: 66, AG: 1}, Not_African_American: {GG: 61}}                         | 1            | 1          | {ARMB: {GG: 58, AG: 1}, APMB: {GG: 69}}                         | 0.4609375       | 1             |
| chr11:1229449   | {African_American: {CC: 63, CT: 1}, Not_African_American: {CC: 50, CT: 5}}                  | 0.09411947   | 0.81817066 | {ARMB: {CC: 56}, APMB: {CC: 57, CT: 6}}                         | 0.028936838     | 1             |
| chr11:1244733   | {African_American: {CC: 55, CT: 8}, Not_African_American: {CC: 59}}                         | 0.00632509   | 0.10642654 | {ARMB: {CC: 51, CT: 6}, APMB: {CC: 63, CT: 2}}                  | 0.144406244     | 1             |
| chr11:1244812   | {African_American: {TT: 65, CC: 1}, Not_African_American: {TT: 59}}                         | 1            | 1          | {ARMB: {TT: 58, CC: 1}, APMB: {TT: 66}}                         | 0.472           | 1             |
| chr11:1244817   | {African_American: {CC: 66, CT: 1}, Not_African_American: {CC: 61}}                         | 1            | 1          | {ARMB: {CC: 58, CT: 1}, APMB: {CC: 69}}                         | 0.4609375       | 1             |
| chr11:33699077  | {African_American: {AA: 67}, Not_African_American: {AA: 59, AG: 1}}                         | 0.47244094   | 0.90275544 | {ARMB: {AA: 59}, APMB: {AA: 67, AG: 1}}                         | 1               | 1             |
| chr11:45921578  | {African_American: {CC: 65}, Not_African_American: {CC: 49, CT: 5, TT: 2}}                  | 0.00367305   | 0.07610248 | {ARMB: {CC: 54, CT: 1}, APMB: {CC: 60, CT: 4, TT: 2}}           | 0.331275823     | 1             |
| chr11:60455790  | {African_American: {TT: 67}, Not_African_American: {TT: 60, AA: 1}}                         | 0.4765625    | 0.90275544 | {ARMB: {TT: 59}, APMB: {TT: 68, AA: 1}}                         | 1               | 1             |
| chr11:60971685  | {African_American: {CC: 67}, Not_African_American: {CC: 60, AA: 1}}                         | 0.4765625    | 0.90275544 | {ARMB: {CC: 58, AA: 1}, APMB: {CC: 69}}                         | 0.4609375       | 1             |
| chr11:61102415  | {African_American: {CC: 67}, Not_African_American: {CC: 60, AA: 1}}                         | 0.4765625    | 0.90275544 | {ARMB: {CC: 59}, APMB: {CC: 68, AA: 1}}                         | 1               | 1             |
| chr11:61102442  | {African_American: {CC: 66, AA: 1}, Not_African_American: {CC: 61}}                         | 1            | 1          | {ARMB: {CC: 58, AA: 1}, APMB: {CC: 69}}                         | 0.4609375       | 1             |
| chr11:61102443  | {African_American: {CC: 65, GG: 1}, Not_African_American: {CC: 61}}                         | 1            | 1          | {ARMB: {CC: 58, GG: 1}, APMB: {CC: 68}}                         | 0.464566929     | 1             |
| chr11:65969132  | {African_American: {CC: 62, CT: 3}, Not_African_American: {CC: 60}}                         | 0.24516129   | 0.90275544 | {ARMB: {CC: 56, CT: 1}, APMB: {CC: 66, CT: 2}}                  | 1               | 1             |
| chr11:66568589  | {African_American: {GG: 64, AG: 1}, Not_African_American: {GG: 59, AG: 1}}                  | 1            | 1          | {ARMB: {GG: 57}, APMB: {GG: 66, AG: 2}}                         | 0.499870968     | 1             |
| chr11:67415703  | {African_American: {CC: 66, GG: 1}, Not_African_American: {CC: 61}}                         | 1</          |            |                                                                 |                 |               |

|                |                                                                                            |            |            |                                                                  |             |   |
|----------------|--------------------------------------------------------------------------------------------|------------|------------|------------------------------------------------------------------|-------------|---|
| chr11:69071686 | {African_American: {GG: 66, AG: 1}, Not_African_American: {GG: 61}}                        | 1          | 1          | {ARMB: {GG: 58, AG: 1}, APMB: {GG: 69}}                          | 0.4609375   | 1 |
| chr11:69071712 | {African_American: {GG: 62, AG: 1}, Not_African_American: {GG: 61}}                        | 1          | 1          | {ARMB: {GG: 57, AG: 1}, APMB: {GG: 66}}                          | 0.467741935 | 1 |
| chr11:69105842 | {African_American: {GG: 67}, Not_African_American: {GG: 57, AG: 2}}                        | 0.21276984 | 0.90275544 | {ARMB: {GG: 55, AG: 2}, APMB: {GG: 69}}                          | 0.202666667 | 1 |
| chr11:70522825 | {African_American: {CC: 67}, Not_African_American: {CC: 60, CT: 1}}                        | 0.4765625  | 0.90275544 | {ARMB: {CC: 59}, APMB: {CC: 68, CT: 1}}                          | 1           | 1 |
| chr11:70522964 | {African_American: {GG: 64, AG: 3}, Not_African_American: {GG: 48, AG: 7}}                 | 0.18251075 | 0.90275544 | {ARMB: {GG: 52, AG: 4}, APMB: {GG: 60, AG: 6}}                   | 0.752307228 | 1 |
| chr11:71478390 | {African_American: {CC: 47, CT: 17}, Not_African_American: {CC: 53, CT: 6}}                | 0.02217203 | 0.28601914 | {ARMB: {CC: 44, CT: 12}, APMB: {CC: 56, CT: 11}}                 | 0.495910618 | 1 |
| chr11:71929024 | {African_American: {CC: 66, CT: 1}, Not_African_American: {CC: 56, CT: 1}}                 | 1          | 1          | {ARMB: {CC: 58, CT: 1}, APMB: {CC: 64, CT: 1}}                   | 1           | 1 |
| chr11:73647665 | {African_American: {CC: 67}, Not_African_American: {CC: 60, GG: 1}}                        | 0.4765625  | 0.90275544 | {ARMB: {CC: 58, GG: 1}, APMB: {CC: 69}}                          | 0.4609375   | 1 |
| chr11:73647667 | {African_American: {CC: 67}, Not_African_American: {CC: 60, GG: 1}}                        | 0.4765625  | 0.90275544 | {ARMB: {CC: 58, GG: 1}, APMB: {CC: 69}}                          | 0.4609375   | 1 |
| chr11:77150940 | {African_American: {GG: 66, AG: 1}, Not_African_American: {GG: 61}}                        | 1          | 1          | {ARMB: {GG: 58, AG: 1}, APMB: {GG: 69}}                          | 0.4609375   | 1 |
| chr11:86676953 | {African_American: {TT: 58, CT: 3, CC: 2}, Not_African_American: {TT: 54, CT: 5, CC: 1}}   | 0.61007271 | 1          | {ARMB: {TT: 52, CT: 3, CC: 3}, APMB: {TT: 60, CT: 5}}            | 0.162485812 | 1 |
| chr11:86677022 | {African_American: {AA: 65, AG: 1}, Not_African_American: {AA: 61}}                        | 1          | 1          | {ARMB: {AA: 59}, APMB: {AA: 67, AG: 1}}                          | 1           | 1 |
| chr11:94973701 | {African_American: {CC: 67}, Not_African_American: {CC: 60, CT: 1}}                        | 0.4765625  | 0.90275544 | {ARMB: {CC: 59}, APMB: {CC: 68, CT: 1}}                          | 1           | 1 |
| chr11:10231750 | {African_American: {CC: 67}, Not_African_American: {CC: 60, GG: 1}}                        | 0.4765625  | 0.90275544 | {ARMB: {CC: 59}, APMB: {CC: 68, GG: 1}}                          | 1           | 1 |
| chr11:11783824 | {African_American: {CC: 67}, Not_African_American: {CC: 60, CT: 1}}                        | 0.4765625  | 0.90275544 | {ARMB: {CC: 58, CT: 1}, APMB: {CC: 69}}                          | 0.4609375   | 1 |
| chr11:11783837 | {African_American: {GG: 62, AG: 3}, Not_African_American: {GG: 61}}                        | 0.2447619  | 0.90275544 | {ARMB: {GG: 57, AG: 2}, APMB: {GG: 66, AG: 1}}                   | 0.599235023 | 1 |
| chr11:11798635 | {African_American: {TT: 59, CT: 5}, Not_African_American: {TT: 60}}                        | 0.05812135 | 0.56650187 | {ARMB: {TT: 56, CT: 2}, APMB: {TT: 63, CT: 3}}                   | 1           | 1 |
| chr11:12012990 | {African_American: {CC: 65, CT: 2}, Not_African_American: {CC: 61}}                        | 0.49717028 | 0.90275544 | {ARMB: {CC: 57, CT: 2}, APMB: {CC: 69}}                          | 0.21050689  | 1 |
| chr11:12618693 | {African_American: {CC: 65, CT: 2}, Not_African_American: {CC: 60, CT: 1}}                 | 1          | 1          | {ARMB: {CC: 57, CT: 2}, APMB: {CC: 68, CT: 1}}                   | 0.594540917 | 1 |
| chr11:13383281 | {African_American: {CC: 62}, Not_African_American: {CC: 57, CT: 1}}                        | 0.48333333 | 0.90275544 | {ARMB: {CC: 57}, APMB: {CC: 62, CT: 1}}                          | 1           | 1 |
| chr11:13383284 | {African_American: {CC: 63}, Not_African_American: {CC: 58, TT: 1}}                        | 0.48360656 | 0.90275544 | {ARMB: {CC: 57, TT: 1}, APMB: {CC: 64}}                          | 0.475409836 | 1 |
| chr11:13383287 | {African_American: {CC: 61, CT: 1}, Not_African_American: {CC: 57, CT: 1}}                 | 1          | 1          | {ARMB: {CC: 57, CT: 1}, APMB: {CC: 65, CT: 1}}                   | 1           | 1 |
| chr12:3077309  | {African_American: {CC: 63, AA: 1}, Not_African_American: {CC: 61}}                        | 1          | 1          | {ARMB: {CC: 56}, APMB: {CC: 68, AA: 1}}                          | 1           | 1 |
| chr12:3077315  | {African_American: {CC: 65, AA: 1}, Not_African_American: {CC: 57}}                        | 1          | 1          | {ARMB: {CC: 56}, APMB: {CC: 66, AA: 1}}                          | 1           | 1 |
| chr12:6376267  | {African_American: {TT: 64, CT: 2}, Not_African_American: {TT: 61}}                        | 0.4968129  | 0.90275544 | {ARMB: {TT: 57, CT: 2}, APMB: {TT: 68}}                          | 0.213848269 | 1 |
| chr12:6445019  | {African_American: {CC: 57, CT: 4}, Not_African_American: {CC: 59, CT: 1}}                 | 0.3645392  | 0.90275544 | {ARMB: {CC: 52, CT: 3}, APMB: {CC: 64, CT: 2}}                   | 0.658168352 | 1 |
| chr12:56521840 | {African_American: {CC: 55, CT: 5}, Not_African_American: {CC: 60, CT: 1}}                 | 0.11415679 | 0.81817066 | {ARMB: {CC: 55, CT: 2}, APMB: {CC: 60, CT: 4}}                   | 0.682803531 | 1 |
| chr12:5755077  | {African_American: {GG: 66, GG: 1}, Not_African_American: {TT: 61}}                        | 1          | 1          | {ARMB: {TT: 58, GG: 1}, APMB: {TT: 69}}                          | 0.4609375   | 1 |
| chr12:92861118 | {African_American: {CC: 67}, Not_African_American: {CC: 60, GG: 1}}                        | 0.4765625  | 0.90275544 | {ARMB: {CC: 59}, APMB: {CC: 68, GG: 1}}                          | 1           | 1 |
| chr12:10924632 | {African_American: {GG: 52, AG: 7}, Not_African_American: {GG: 55, AG: 2}}                 | 0.16295309 | 0.90275544 | {ARMB: {GG: 47, AG: 6}, APMB: {GG: 60, AG: 3}}                   | 0.297013789 | 1 |
| chr12:11649728 | {African_American: {GG: 67}, Not_African_American: {GG: 59, AG: 1}}                        | 0.47244094 | 0.90275544 | {ARMB: {GG: 58, AG: 1}, APMB: {GG: 68}}                          | 0.464566929 | 1 |
| chr12:11703373 | {African_American: {CC: 56, CT: 9}, Not_African_American: {CC: 61}}                        | 0.00299449 | 0.0678263  | {ARMB: {CC: 51, CT: 7}, APMB: {CC: 66, CT: 2}}                   | 0.079187926 | 1 |
| chr12:11703374 | {African_American: {CC: 64, CT: 2}, Not_African_American: {CC: 61}}                        | 0.4968129  | 0.90275544 | {ARMB: {CC: 58, CT: 1}, APMB: {CC: 67, CT: 1}}                   | 1           | 1 |
| chr12:11705420 | {African_American: {GG: 59, AG: 3, AA: 1}, Not_African_American: {GG: 61}}                 | 0.17954562 | 0.90275544 | {ARMB: {GG: 54, AG: 2, AA: 1}, APMB: {GG: 66, AG: 1}}            | 0.405548924 | 1 |
| chr12:11767835 | {African_American: {GG: 61, AG: 3}, Not_African_American: {GG: 36, AG: 12, AA: 5}}         | 0.00018264 | 0.008835   | {ARMB: {GG: 41, AG: 9, AA: 3}, APMB: {GG: 56, AG: 6, AA: 2}}     | 0.382707843 | 1 |
| chr12:11767842 | {African_American: {GG: 58, AG: 4}, Not_African_American: {GG: 61}}                        | 0.11892764 | 0.81817066 | {ARMB: {GG: 53, AG: 2}, APMB: {GG: 66, AG: 2}}                   | 1           | 1 |
| chr12:12191851 | {African_American: {CC: 66, CT: 1}, Not_African_American: {CC: 60}}                        | 1          | 1          | {ARMB: {CC: 59}, APMB: {CC: 67, CT: 1}}                          | 1           | 1 |
| chr12:12191857 | {African_American: {CC: 65, CT: 1}, Not_African_American: {CC: 59, CT: 1}}                 | 1          | 1          | {ARMB: {CC: 58, CT: 1}, APMB: {CC: 66, CT: 1}}                   | 1           | 1 |
| chr12:12430150 | {African_American: {GG: 63, AG: 3}, Not_African_American: {GG: 61}}                        | 0.24521935 | 0.90275544 | {ARMB: {GG: 56, AG: 3}, APMB: {GG: 68}}                          | 0.097514811 | 1 |
| chr12:12430154 | {African_American: {GG: 48, AG: 10, AA: 1}, Not_African_American: {GG: 45, AG: 1}}         | 0.63986491 | 1          | {ARMB: {GG: 43, AG: 12}, APMB: {GG: 50, AG: 10, AA: 1}}          | 0.636271685 | 1 |
| chr12:13231036 | {African_American: {GG: 66, AG: 1}, Not_African_American: {GG: 61}}                        | 1          | 1          | {ARMB: {GG: 58, AG: 1}, APMB: {GG: 69}}                          | 0.4609375   | 1 |
| chr12:13231044 | {African_American: {CC: 66, CT: 1}, Not_African_American: {CC: 60}}                        | 1          | 1          | {ARMB: {CC: 58}, APMB: {CC: 68, CT: 1}}                          | 1           | 1 |
| chr13:28618813 | {African_American: {CC: 63, CT: 3}, Not_African_American: {CC: 61}}                        | 0.24521935 | 0.90275544 | {ARMB: {CC: 58, CT: 1}, APMB: {CC: 66, CT: 2}}                   | 1           | 1 |
| chr13:29339999 | {African_American: {GG: 65, AG: 2}, Not_African_American: {GG: 36, AG: 12, AA: 5}}         | 2.39466-05 | 0.00142569 | {ARMB: {GG: 42, AG: 8, AA: 3}, APMB: {GG: 59, AG: 6, AA: 2}}     | 0.411788408 | 1 |
| chr13:30107674 | {African_American: {CC: 65, CT: 1}, Not_African_American: {CC: 61}}                        | 1          | 1          | {ARMB: {CC: 58, CT: 1}, APMB: {CC: 68}}                          | 0.464566929 | 1 |
| chr13:30107790 | {African_American: {CC: 63, CT: 3}, Not_African_American: {CC: 61}}                        | 0.24521935 | 0.90275544 | {ARMB: {CC: 58, CT: 1}, APMB: {CC: 66, CT: 2}}                   | 1           | 1 |
| chr13:30170953 | {African_American: {GG: 67}, Not_African_American: {GG: 60, AG: 1}}                        | 0.4765625  | 0.90275544 | {ARMB: {GG: 58, AG: 1}, APMB: {GG: 69}}                          | 0.4609375   | 1 |
| chr13:47841332 | {African_American: {CC: 66, CT: 1}, Not_African_American: {CC: 60, CT: 1}}                 | 1          | 1          | {ARMB: {CC: 58, CT: 1}, APMB: {CC: 68, CT: 1}}                   | 1           | 1 |
| chr13:47841352 | {African_American: {AA: 65, AG: 2}, Not_African_American: {AA: 61}}                        | 0.49717028 | 0.90275544 | {ARMB: {AA: 59}, APMB: {AA: 67, AG: 2}}                          | 0.49913878  | 1 |
| chr13:60591615 | {African_American: {TT: 67, CT: 1}, Not_African_American: {TT: 61}}                        | 1          | 1          | {ARMB: {TT: 58}, APMB: {TT: 68, CT: 1}}                          | 1           | 1 |
| chr13:94601862 | {African_American: {CC: 62, CT: 2, TT: 1}, Not_African_American: {CC: 60, TT: 1}}          | 0.74647134 | 1          | {ARMB: {CC: 54, CT: 2, TT: 1}, APMB: {CC: 68, TT: 1}}            | 0.452239631 | 1 |
| chr13:99390746 | {African_American: {CC: 62, CT: 1}, Not_African_American: {CC: 57}}                        | 1          | 1          | {ARMB: {CC: 54}, APMB: {CC: 65, CT: 1}}                          | 1           | 1 |
| chr13:11066821 | {African_American: {GG: 67}, Not_African_American: {GG: 60, AG: 1}}                        | 0.4765625  | 0.90275544 | {ARMB: {GG: 59}, APMB: {GG: 68, AG: 1}}                          | 1           | 1 |
| chr13:11066827 | {African_American: {GG: 66}, Not_African_American: {GG: 60, AG: 1}}                        | 0.48031496 | 0.90275544 | {ARMB: {GG: 58}, APMB: {GG: 68, AG: 1}}                          | 1           | 1 |
| chr13:11201385 | {African_American: {CC: 63}, Not_African_American: {CC: 57, CT: 1}}                        | 0.47938884 | 0.90275544 | {ARMB: {CC: 56, CT: 1}, APMB: {CC: 64}}                          | 0.47017438  | 1 |
| chr13:11201387 | {African_American: {GG: 66, AG: 1}, Not_African_American: {GG: 61}}                        | 1          | 1          | {ARMB: {GG: 58, AG: 1}, APMB: {GG: 69}}                          | 0.4609375   | 1 |
| chr13:11211689 | {African_American: {AA: 56, AG: 7, GG: 1}, Not_African_American: {AA: 59}}                 | 0.00910096 | 0.14360948 | {ARMB: {AA: 51, AG: 3, GG: 1}, APMB: {AA: 64, AG: 4}}            | 0.834034826 | 1 |
| chr13:11211696 | {African_American: {CC: 64, TT: 1}, Not_African_American: {CC: 41, TT: 12}}                | 0.00049741 | 0.01904412 | {ARMB: {CC: 47, TT: 6}, APMB: {CC: 58, TT: 7}}                   | 1           | 1 |
| chr13:11211697 | {African_American: {CC: 65, TT: 1}, Not_African_American: {CC: 44, TT: 12}}                | 0.00053893 | 0.01904412 | {ARMB: {CC: 49, TT: 6}, APMB: {CC: 60, TT: 7}}                   | 1           | 1 |
| chr13:11211698 | {African_American: {CC: 65, TT: 1}, Not_African_American: {CC: 44, TT: 11}}                | 0.00113288 | 0.03507406 | {ARMB: {CC: 49, TT: 6}, APMB: {CC: 60, TT: 6}}                   | 0.768512602 | 1 |
| chr13:11211699 | {African_American: {CC: 64, TT: 1}, Not_African_American: {CC: 45, TT: 11}}                | 0.00121885 | 0.03628417 | {ARMB: {CC: 50, TT: 6}, APMB: {CC: 59, TT: 6}}                   | 1           | 1 |
| chr13:11211705 | {African_American: {GG: 67}, Not_African_American: {GG: 60, AG: 1}}                        | 0.4765625  | 0.90275544 | {ARMB: {GG: 58, AG: 1}, APMB: {GG: 69}}                          | 0.4609375   | 1 |
| chr13:11232968 | {African_American: {AA: 67}, Not_African_American: {AA: 59, AG: 1}}                        | 0.47244094 | 0.90275544 | {ARMB: {AA: 59}, APMB: {AA: 67, AG: 1}}                          | 1           | 1 |
| chr13:11232972 | {African_American: {CC: 57, CT: 1}, Not_African_American: {CC: 61}}                        | 0.48739496 | 0.90275544 | {ARMB: {CC: 53, CT: 1}, APMB: {CC: 65}}                          | 0.453781513 | 1 |
| chr14:20601703 | {African_American: {AA: 66, AG: 1}, Not_African_American: {AA: 61}}                        | 1          | 1          | {ARMB: {AA: 59}, APMB: {AA: 68, AG: 1}}                          | 1           | 1 |
| chr14:21511397 | {African_American: {AA: 65, AG: 1}, Not_African_American: {AA: 61}}                        | 1          | 1          | {ARMB: {AA: 57, AG: 1}, APMB: {AA: 69}}                          | 0.456692913 | 1 |
| chr14:63315203 | {African_American: {CC: 67}, Not_African_American: {CC: 60, AA: 1}}                        | 0.4765625  | 0.90275544 | {ARMB: {CC: 58, AA: 1}, APMB: {CC: 69}}                          | 0.4609375   | 1 |
| chr14:63315213 | {African_American: {CC: 67}, Not_African_American: {CC: 60, AA: 1}}                        | 0.4765625  | 0.90275544 | {ARMB: {CC: 58, AA: 1}, APMB: {CC: 69}}                          | 0.4609375   | 1 |
| chr14:64655015 | {African_American: {GG: 66, AG: 1}, Not_African_American: {GG: 61}}                        | 1          | 1          | {ARMB: {GG: 58, AG: 1}, APMB: {GG: 69}}                          | 0.4609375   | 1 |
| chr14:75233967 | {African_American: {GG: 66, AG: 1}, Not_African_American: {GG: 61}}                        | 1          | 1          | {ARMB: {GG: 59}, APMB: {GG: 68, AG: 1}}                          | 1           | 1 |
| chr14:95327733 | {African_American: {CC: 66, CT: 1}, Not_African_American: {CC: 61}}                        | 1          | 1          | {ARMB: {CC: 59}, APMB: {CC: 68, CT: 1}}                          | 1           | 1 |
| chr14:97217853 | {African_American: {GG: 60, AG: 5, AA: 1}, Not_African_American: {GG: 61}}                 | 0.05855316 | 0.56650187 | {ARMB: {GG: 54, AG: 4}, APMB: {GG: 67, AA: 1, AG: 1}}            | 0.177378532 | 1 |
| chr14:10060356 | {African_American: {GG: 44, TT: 16}, Not_African_American: {GG: 37, TT: 24}}               | 0.17665912 | 0.90275544 | {ARMB: {GG: 34, TT: 21}, APMB: {GG: 47, TT: 19}}                 | 0.333030321 | 1 |
| chr14:10309526 | {African_American: {CC: 67}, Not_African_American: {CC: 60, TT: 1}}                        | 0.4765625  | 0.90275544 | {ARMB: {CC: 58, TT: 1}, APMB: {CC: 69}}                          | 0.4609375   | 1 |
| chr14:10309531 | {African_American: {GG: 51, AG: 8}, Not_African_American: {GG: 59, AG: 1}}                 | 0.01658306 | 0.22621947 | {ARMB: {GG: 50, AG: 5}, APMB: {GG: 60, AG: 4}}                   | 0.731153399 | 1 |
| chr14:10309535 | {African_American: {GG: 54, AG: 7}, Not_African_American: {GG: 59, AG: 1}}                 | 0.061393   | 0.5866442  | {ARMB: {GG: 49, AG: 6}, APMB: {GG: 64, AG: 2}}                   | 0.139339497 | 1 |
| chr14:10410117 | {African_American: {CC: 58, AA: 2}, Not_African_American: {CC: 59}}                        | 0.49579832 | 0.90275544 | {ARMB: {CC: 52, AA: 1}, APMB: {CC: 65, AA: 1}}                   | 1           | 1 |
| chr14:10428501 | {African_American: {CC: 63, CT: 1}, Not_African_American: {CC: 60}}                        | 1          | 1          | {ARMB: {CC: 58}, APMB: {CC: 65, CT: 1}}                          | 1           | 1 |
| chr14:10428508 | {African_American: {GG: 66, AG: 1}, Not_African_American: {GG: 61}}                        | 1          | 1          | {ARMB: {GG: 59}, APMB: {GG: 68, AG: 1}}                          | 1           | 1 |
| chr14:10431472 | {African_American: {GG: 65, AG: 1}, Not_African_American: {GG: 61}}                        | 1          | 1          | {ARMB: {GG: 59}, APMB: {GG: 67, AG: 1}}                          | 1           | 1 |
| chr14:10431472 | {African_American: {CC: 58, CT: 6}, Not_African_American: {CC: 41, CT: 11, TT: 6}}         | 0.00445491 | 0.08145506 | {ARMB: {CC: 40, CT: 12, TT: 5}, APMB: {CC: 59, CT: 5, TT: 1}}    | 0.011325174 | 1 |
| chr14:10431475 | {African_American: {GG: 66, AG: 1}, Not_African_American: {GG: 61}}                        | 1          | 1          | {ARMB: {GG: 58, AG: 1}, APMB: {GG: 69}}                          | 0.4609375   | 1 |
| chr14:10431480 | {African_American: {GG: 63}, Not_African_American: {GG: 59, AG: 1}}                        | 0.48780488 | 0.90275544 | {ARMB: {GG: 55}, APMB: {GG: 67, AG: 1}}                          | 1           | 1 |
| chr14:10431481 | {African_American: {CC: 47, CT: 12, TT: 3}, Not_African_American: {CC: 35, CT: 14, TT: 7}} | 0.21276186 | 0.90275544 | {ARMB: {CC: 37, CT: 14, TT: 5}, APMB: {CC: 45, CT: 12, TT: 5}}   | 0.793384179 | 1 |
| chr14:10487842 | {African_American: {CC: 46, CT: 17}, Not_African_American: {TT: 23, CT: 17, CC: 13}}       | 4.43666-11 | 1.717E-08  | {ARMB: {CC: 21, CT: 19, TT: 13}, APMB: {CC: 38, CT: 15, TT: 10}} | 0.094232723 | 1 |
| chr14:10487848 | {African_American: {GG: 67}, Not_African_American: {GG: 56, AG: 2}}                        | 0.21329032 | 0.90275544 | {ARMB: {GG: 55, AG: 2}, APMB: {GG: 68}}                          | 0.205935484 | 1 |
| chr15:81002335 | {African_American: {AA: 62, AG: 4}, Not_African_American: {AA: 61}}                        | 0.12023416 | 0.81817066 | {ARMB: {AA: 55, AG: 3}, APMB: {AA: 68, AG: 1}}                   | 0.330716886 | 1 |
| chr15:82952716 | {African_American: {GG: 66, AG: 1}, Not_African_American: {GG: 61}}                        | 1          | 1          | {ARMB: {GG: 59}, APMB: {GG: 68, AG: 1}}                          | 1           | 1 |
| chr15:94317481 | {African_American: {TT: 57, CT: 5}, Not_African_American: {TT: 61}}                        | 0.05748169 | 0.56650187 | {ARMB: {TT: 53, CT: 4}, APMB: {TT: 65, CT: 1}}                   | 0.18139696  | 1 |
| chr16:1533598  | {African_American: {CC: 66, CT: 1}, Not_African_American: {CC: 61}}                        | 1          | 1          | {ARMB: {CC: 58, CT: 1}, APMB: {CC: 69}}                          | 0.4609375   | 1 |
| chr16:3484909  | {African_American: {GG: 66, AG: 1}, Not_African_American: {GG: 61}}                        | 1          | 1          | {ARMB: {GG: 59}, APMB: {GG: 68, AG: 1}}                          | 1           | 1 |
| chr16:3484915  | {African_American: {CC: 67}, Not_African_American: {CC: 59, CT: 1}}                        | 0.47244094 | 0.90275544 | {ARMB: {CC: 57, CT: 1}, APMB: {CC: 69}}                          | 0.456692913 | 1 |
| chr16:3484934  | {African_American: {TT: 65, CT: 1}, Not_African_American: {TT: 61}}                        | 1          | 1          | {ARMB: {TT: 57, CT: 1}, APMB: {TT: 69}}                          | 0.456692913 | 1 |
| chr16:11135793 | {African_American: {AA: 66, AG: 1}, Not_African_American: {AA: 61}}                        | 1          | 1          | {ARMB: {AA: 59}, APMB: {AA: 68, AG: 1}}                          | 1           | 1 |
| chr16:14959878 | {African_American: {CC: 67}, Not_African_American: {CC: 60, AA: 1}}                        | 0.4765625  | 0.90275544 | {ARMB: {CC: 59}, APMB: {CC: 68, AA: 1}}                          | 1           | 1 |
| chr16:17134595 | {African_American:                                                                         |            |            |                                                                  |             |   |

|                |                                                                                             |            |            |                                                                 |             |   |
|----------------|---------------------------------------------------------------------------------------------|------------|------------|-----------------------------------------------------------------|-------------|---|
| chr16:55760650 | {African_American: {CC: 66, CT: 1}, Not_African_American: {CC: 61}}                         | 1          | 1          | {ARMB: {CC: 58, CT: 1}, APMB: {CC: 69}}                         | 0.4609375   | 1 |
| chr16:55760753 | {African_American: {AA: 60, AG: 4}, Not_African_American: {AA: 59, AG: 2}}                  | 0.68032252 | 1          | {ARMB: {AA: 56, AG: 2}, APMB: {AA: 63, AG: 4}}                  | 0.684870029 | 1 |
| chr16:55760806 | {African_American: {GG: 56, AG: 11}, Not_African_American: {GG: 34, AG: 18, AA: 6}}         | 0.00095867 | 0.03091726 | {ARMB: {GG: 47, AG: 9, AA: 2}, APMB: {GG: 43, AG: 20, AA: 4}}   | 0.100027185 | 1 |
| chr16:55760829 | {African_American: {AA: 66, AG: 1}, Not_African_American: {AA: 61}}                         | 1          | 1          | {ARMB: {AA: 59}, APMB: {AA: 68, AG: 1}}                         | 1           | 1 |
| chr16:55760853 | {African_American: {AA: 60, AG: 5}, Not_African_American: {AA: 59, AG: 1}}                  | 0.20962115 | 0.90275544 | {ARMB: {AA: 56, AG: 1}, APMB: {AA: 63, AG: 5}}                  | 0.218444235 | 1 |
| chr16:55760909 | {African_American: {CC: 65, CT: 1}, Not_African_American: {CC: 61}}                         | 1          | 1          | {ARMB: {CC: 57, CT: 1}, APMB: {CC: 69}}                         | 0.456692913 | 1 |
| chr16:59533042 | {African_American: {GG: 53, AA: 3}, Not_African_American: {GG: 61}}                         | 0.1065621  | 0.81817066 | {ARMB: {GG: 51, AA: 3}, APMB: {GG: 63}}                         | 0.095352324 | 1 |
| chr16:59533053 | {African_American: {AA: 63, GG: 1, AG: 1}, Not_African_American: {AA: 60, GG: 1}}           | 1          | 1          | {ARMB: {AA: 56, GG: 1, AG: 1}, APMB: {AA: 67, GG: 1}}           | 0.729392729 | 1 |
| chr16:68707872 | {African_American: {GG: 65, AG: 1}, Not_African_American: {GG: 61}}                         | 1          | 1          | {ARMB: {GG: 57, AG: 1}, APMB: {GG: 69}}                         | 0.456692913 | 1 |
| chr16:68707925 | {African_American: {CC: 65, CT: 2}, Not_African_American: {CC: 61}}                         | 0.49717028 | 0.90275544 | {ARMB: {CC: 59}, APMB: {CC: 67, CT: 2}}                         | 0.49913878  | 1 |
| chr16:76048043 | {African_American: {TT: 66, GG: 1}, Not_African_American: {TT: 61}}                         | 1          | 1          | {ARMB: {TT: 58, GG: 1}, APMB: {TT: 69}}                         | 0.4609375   | 1 |
| chr16:84344220 | {African_American: {CC: 64, CT: 3}, Not_African_American: {CC: 58, CT: 2}}                  | 1          | 1          | {ARMB: {CC: 56, CT: 3}, APMB: {CC: 66, CT: 2}}                  | 0.662715347 | 1 |
| chr16:85360587 | {African_American: {GG: 48, AG: 7, AA: 2}, Not_African_American: {GG: 60, AG: 1}}           | 0.01078941 | 0.16374513 | {ARMB: {GG: 51, AG: 4}, APMB: {GG: 57, AG: 4, AA: 2}}           | 0.639290392 | 1 |
| chr16:87808602 | {African_American: {GG: 62, AG: 3}, Not_African_American: {GG: 59, AG: 1}}                  | 0.62011582 | 1          | {ARMB: {GG: 57, AG: 2}, APMB: {GG: 64, AG: 2}}                  | 1           | 1 |
| chr16:88599640 | {African_American: {GG: 60, AG: 3}, Not_African_American: {GG: 43, AG: 12, AA: 3}}          | 0.00299137 | 0.0678263  | {ARMB: {GG: 45, AG: 9, AA: 1}, APMB: {GG: 58, AG: 6, AA: 2}}    | 0.454605774 | 1 |
| chr16:88909531 | {African_American: {GG: 60, CC: 3}, Not_African_American: {GG: 52, CC: 3}}                  | 1          | 1          | {ARMB: {GG: 52, CC: 4}, APMB: {GG: 60, CC: 2}}                  | 0.421132653 | 1 |
| chr16:88909671 | {African_American: {GG: 66, AG: 1}, Not_African_American: {GG: 60, AG: 1}}                  | 1          | 1          | {ARMB: {GG: 58, AG: 1}, APMB: {GG: 68, AG: 1}}                  | 1           | 1 |
| chr16:88910612 | {African_American: {GG: 64, AG: 1}, Not_African_American: {GG: 61}}                         | 1          | 1          | {ARMB: {GG: 58}, APMB: {GG: 67, AG: 1}}                         | 1           | 1 |
| chr16:90031340 | {African_American: {CC: 51, CT: 8, TT: 1}, Not_African_American: {CC: 52, CT: 5}}           | 0.55977562 | 1          | {ARMB: {CC: 44, CT: 8, TT: 1}, APMB: {CC: 59, CT: 5}}           | 0.185518779 | 1 |
| chr17:1469676  | {African_American: {GG: 59, AG: 1}, Not_African_American: {GG: 54, AG: 2, AA: 1}}           | 0.42163534 | 0.90275544 | {ARMB: {GG: 51, AG: 1}, APMB: {GG: 62, AG: 2, AA: 1}}           | 1           | 1 |
| chr17:2030143  | {African_American: {TT: 66, GG: 1}, Not_African_American: {TT: 61}}                         | 1          | 1          | {ARMB: {TT: 59}, APMB: {TT: 68, GG: 1}}                         | 1           | 1 |
| chr17:3641939  | {African_American: {GG: 61, AG: 3}, Not_African_American: {GG: 61}}                         | 0.2443871  | 0.90275544 | {ARMB: {GG: 58, AG: 1}, APMB: {GG: 64, AG: 2}}                  | 1           | 1 |
| chr17:4177816  | {African_American: {CC: 65, CT: 2}, Not_African_American: {CC: 61}}                         | 0.49717028 | 0.90275544 | {ARMB: {CC: 58, CT: 1}, APMB: {CC: 68, CT: 1}}                  | 1           | 1 |
| chr17:4177895  | {African_American: {CC: 67}, Not_African_American: {CC: 60, CT: 1}}                         | 0.4765625  | 0.90275544 | {ARMB: {CC: 58, CT: 1}, APMB: {CC: 69}}                         | 0.4609375   | 1 |
| chr17:9105136  | {African_American: {CC: 66, CT: 1}, Not_African_American: {CC: 61}}                         | 1          | 1          | {ARMB: {CC: 59}, APMB: {CC: 68, CT: 1}}                         | 1           | 1 |
| chr17:14318263 | {African_American: {CC: 60, CT: 2}, Not_African_American: {CC: 47, CT: 7}}                  | 0.07969857 | 0.73436535 | {ARMB: {CC: 49, CT: 3}, APMB: {CC: 58, CT: 6}}                  | 0.72924257  | 1 |
| chr17:22694621 | {African_American: {GG: 67}, Not_African_American: {GG: 57, AA: 1, AG: 1}}                  | 0.21726984 | 0.90275544 | {ARMB: {GG: 57, AA: 1}, APMB: {GG: 67, AG: 1}}                  | 0.710730159 | 1 |
| chr17:22694649 | {African_American: {GG: 67}, Not_African_American: {GG: 58, AA: 1, AG: 1}}                  | 0.2212235  | 0.90275544 | {ARMB: {GG: 58, AA: 1}, APMB: {GG: 67, AG: 1}}                  | 0.715285589 | 1 |
| chr17:31512642 | {African_American: {GG: 62, AG: 1}, Not_African_American: {GG: 60, AG: 1}}                  | 1          | 1          | {ARMB: {GG: 56}, APMB: {GG: 66, AG: 2}}                         | 0.500655652 | 1 |
| chr17:31709570 | {African_American: {AA: 66, AG: 1}, Not_African_American: {AA: 61}}                         | 1          | 1          | {ARMB: {AA: 59}, APMB: {AA: 68, AG: 1}}                         | 1           | 1 |
| chr17:31709686 | {African_American: {CC: 60, CT: 5, TT: 1}, Not_African_American: {CC: 46, CT: 7, TT: 1}}    | 0.68569841 | 1          | {ARMB: {CC: 48, CT: 7}, APMB: {CC: 58, CT: 5, TT: 2}}           | 0.476695861 | 1 |
| chr17:32183977 | {African_American: {CC: 67}, Not_African_American: {CC: 60, AA: 1}}                         | 0.4765625  | 0.90275544 | {ARMB: {CC: 58, AA: 1}, APMB: {CC: 69}}                         | 0.4609375   | 1 |
| chr17:32183979 | {African_American: {CC: 67}, Not_African_American: {CC: 60, AA: 1}}                         | 0.4765625  | 0.90275544 | {ARMB: {CC: 58, AA: 1}, APMB: {CC: 69}}                         | 0.4609375   | 1 |
| chr17:34255217 | {African_American: {TT: 65, CT: 1}, Not_African_American: {TT: 60}}                         | 1          | 1          | {ARMB: {TT: 59}, APMB: {TT: 66, CT: 1}}                         | 1           | 1 |
| chr17:39963039 | {African_American: {CC: 67}, Not_African_American: {CC: 60, AA: 1}}                         | 0.4765625  | 0.90275544 | {ARMB: {CC: 59}, APMB: {CC: 68, AA: 1}}                         | 1           | 1 |
| chr17:50612526 | {African_American: {GG: 62, AA: 1}, Not_African_American: {GG: 61}}                         | 1          | 1          | {ARMB: {GG: 57, AA: 1}, APMB: {GG: 66}}                         | 0.467741935 | 1 |
| chr17:76521074 | {African_American: {CC: 66, AA: 1}, Not_African_American: {CC: 61}}                         | 1          | 1          | {ARMB: {CC: 58, AA: 1}, APMB: {CC: 69}}                         | 0.4609375   | 1 |
| chr17:77258551 | {African_American: {GG: 63, AG: 3}, Not_African_American: {GG: 61}}                         | 0.24521935 | 0.90275544 | {ARMB: {GG: 57, AG: 1}, APMB: {GG: 67, AG: 2}}                  | 1           | 1 |
| chr17:77258626 | {African_American: {AA: 62, AG: 4}, Not_African_American: {AA: 61}}                         | 0.12023416 | 0.81817066 | {ARMB: {AA: 58, AG: 1}, APMB: {AA: 65, AG: 3}}                  | 0.622854434 | 1 |
| chr17:79452925 | {African_American: {GG: 60, AG: 1}, Not_African_American: {GG: 58}}                         | 1          | 1          | {ARMB: {GG: 55, AG: 1}, APMB: {GG: 63}}                         | 0.440582325 | 1 |
| chr17:79452932 | {African_American: {CC: 60, CT: 5}, Not_African_American: {CC: 59, CT: 2}}                  | 0.44142375 | 0.90275544 | {ARMB: {CC: 56, CT: 3}, APMB: {CC: 63, CT: 4}}                  | 1           | 1 |
| chr17:79452948 | {African_American: {GG: 63}, Not_African_American: {GG: 60, AG: 1}}                         | 0.49193548 | 0.90275544 | {ARMB: {GG: 57}, APMB: {GG: 66, AG: 1}}                         | 1           | 1 |
| chr17:79453006 | {African_American: {GG: 60, AA: 3, AG: 2}, Not_African_American: {GG: 61}}                  | 0.12156282 | 0.81817066 | {ARMB: {GG: 57, AA: 1, AG: 1}, APMB: {GG: 64, AA: 2, AG: 1}}    | 1           | 1 |
| chr17:79453020 | {African_American: {CC: 65, CT: 2}, Not_African_American: {CC: 60, CT: 1}}                  | 1          | 1          | {ARMB: {CC: 58, CT: 1}, APMB: {CC: 67, CT: 2}}                  | 1           | 1 |
| chr17:79453117 | {African_American: {CC: 65, CT: 1}, Not_African_American: {CC: 61}}                         | 1          | 1          | {ARMB: {CC: 58, CT: 1}, APMB: {CC: 68}}                         | 0.464566929 | 1 |
| chr17:80236435 | {African_American: {CC: 51, CT: 11}, Not_African_American: {CC: 55, CT: 4}}                 | 0.09714154 | 0.81817066 | {ARMB: {CC: 44, CT: 9}, APMB: {CC: 62, CT: 6}}                  | 0.265846749 | 1 |
| chr17:80236497 | {African_American: {CC: 64, CT: 2}, Not_African_American: {CC: 61}}                         | 0.4968129  | 0.90275544 | {ARMB: {CC: 58, CT: 1}, APMB: {CC: 67, CT: 1}}                  | 1           | 1 |
| chr17:80707826 | {African_American: {CC: 67}, Not_African_American: {CC: 60, CT: 1}}                         | 0.4765625  | 0.90275544 | {ARMB: {CC: 59}, APMB: {CC: 68, CT: 1}}                         | 1           | 1 |
| chr17:80879029 | {African_American: {GG: 53, AG: 8, AA: 3}, Not_African_American: {GG: 34, AG: 14, AA: 5}}   | 0.07319765 | 0.69091441 | {ARMB: {GG: 40, AG: 11, AA: 1}, APMB: {GG: 47, AG: 11, AA: 7}}  | 0.17226299  | 1 |
| chr17:80879072 | {African_American: {GG: 67}, Not_African_American: {GG: 59, AG: 1}}                         | 0.47244094 | 0.90275544 | {ARMB: {GG: 59}, APMB: {GG: 67, AG: 1}}                         | 1           | 1 |
| chr17:81071668 | {African_American: {CC: 54, CT: 4}, Not_African_American: {CC: 61}}                         | 0.05342946 | 0.55139198 | {ARMB: {CC: 52, CT: 3}, APMB: {CC: 63, CT: 1}}                  | 0.334410561 | 1 |
| chr17:81071673 | {African_American: {GG: 66}, Not_African_American: {GG: 58, AG: 1}}                         | 0.472      | 0.90275544 | {ARMB: {GG: 58}, APMB: {GG: 66, AG: 1}}                         | 1           | 1 |
| chr17:81071766 | {African_American: {CC: 60, CT: 2, TT: 1}, Not_African_American: {CC: 57, CT: 4}}           | 0.43583481 | 0.90275544 | {ARMB: {CC: 53, CT: 4, TT: 1}, APMB: {CC: 64, CT: 2}}           | 0.306476513 | 1 |
| chr17:81071796 | {African_American: {GG: 66, AG: 1}, Not_African_American: {GG: 61}}                         | 1          | 1          | {ARMB: {GG: 58, AG: 1}, APMB: {GG: 69}}                         | 0.4609375   | 1 |
| chr17:81110092 | {African_American: {GG: 64, TT: 1}, Not_African_American: {GG: 57}}                         | 1          | 1          | {ARMB: {GG: 54, TT: 1}, APMB: {GG: 67}}                         | 0.450819672 | 1 |
| chr17:81110218 | {African_American: {AA: 63, AG: 2}, Not_African_American: {AA: 61}}                         | 0.49650794 | 0.90275544 | {ARMB: {AA: 58}, APMB: {AA: 66, AG: 2}}                         | 0.499174603 | 1 |
| chr17:82218731 | {African_American: {GG: 67}, Not_African_American: {GG: 60, AG: 1}}                         | 0.4765625  | 0.90275544 | {ARMB: {GG: 59}, APMB: {GG: 68, AG: 1}}                         | 1           | 1 |
| chr17:82218823 | {African_American: {CC: 67}, Not_African_American: {CC: 58, CT: 3}}                         | 0.10542627 | 0.81817066 | {ARMB: {CC: 58, CT: 1}, APMB: {CC: 67, CT: 2}}                  | 1           | 1 |
| chr18:514471   | {African_American: {GG: 59, AG: 2}, Not_African_American: {GG: 56, AG: 3}}                  | 0.67688357 | 1          | {ARMB: {GG: 53, AG: 2}, APMB: {GG: 62, AG: 3}}                  | 1           | 1 |
| chr18:514558   | {African_American: {AA: 60, AG: 2, GG: 1}, Not_African_American: {AA: 55, GG: 1}}           | 0.74749492 | 1          | {ARMB: {AA: 52, GG: 2, AG: 1}, APMB: {AA: 63, AG: 1}}           | 0.460081295 | 1 |
| chr18:10128035 | {African_American: {AA: 34, AG: 23, GG: 3}, Not_African_American: {AA: 24, AG: 19, GG: 13}} | 0.01706695 | 0.22775554 | {ARMB: {AA: 21, AG: 20, GG: 10}, APMB: {AA: 37, AG: 22, GG: 6}} | 0.149525925 | 1 |
| chr18:29179170 | {African_American: {CC: 66, AA: 1}, Not_African_American: {CC: 61}}                         | 1          | 1          | {ARMB: {CC: 59}, APMB: {CC: 68, AA: 1}}                         | 1           | 1 |
| chr18:29179190 | {African_American: {TT: 67}, Not_African_American: {TT: 60, AA: 1}}                         | 0.4765625  | 0.90275544 | {ARMB: {TT: 58, AA: 1}, APMB: {TT: 69}}                         | 0.4609375   | 1 |
| chr18:37310893 | {African_American: {CC: 56, CT: 8, TT: 1}, Not_African_American: {CC: 43, CT: 9, TT: 1}}    | 0.22342402 | 0.90275544 | {ARMB: {CC: 42, CT: 11, TT: 3}, APMB: {CC: 57, CT: 6, TT: 2}}   | 0.186505844 | 1 |
| chr18:37310916 | {African_American: {AA: 66, AG: 1}, Not_African_American: {AA: 61}}                         | 1          | 1          | {ARMB: {AA: 59}, APMB: {AA: 68, AG: 1}}                         | 1           | 1 |
| chr18:46149862 | {African_American: {CC: 56, CT: 3, TT: 1}, Not_African_American: {CC: 61}}                  | 0.05739982 | 0.56650187 | {ARMB: {CC: 54, CT: 1, TT: 1}, APMB: {CC: 63, CT: 2}}           | 0.7840528   | 1 |
| chr18:48113788 | {African_American: {CC: 64, AG: 1}, Not_African_American: {CC: 58, CT: 1}}                  | 0.4796748  | 0.90275544 | {ARMB: {CC: 55, CT: 1}, APMB: {CC: 67}}                         | 0.455284553 | 1 |
| chr18:48113883 | {African_American: {GG: 61, AG: 3, AA: 1}, Not_African_American: {GG: 49, AG: 7}}           | 0.18458792 | 0.90275544 | {ARMB: {GG: 47, AG: 7}, APMB: {GG: 63, AG: 3, AA: 1}}           | 0.143008087 | 1 |
| chr18:70288978 | {African_American: {GG: 66, GG: 1}, Not_African_American: {CC: 61}}                         | 1          | 1          | {ARMB: {CC: 59}, APMB: {CC: 68, GG: 1}}                         | 1           | 1 |
| chr18:79404224 | {African_American: {GG: 62, AG: 4}, Not_African_American: {GG: 61}}                         | 0.12023416 | 0.81817066 | {ARMB: {GG: 57, AG: 1}, APMB: {GG: 66, AG: 3}}                  | 0.624762582 | 1 |
| chr19:544037   | {African_American: {CC: 66, AG: 1}, Not_African_American: {CC: 58, CT: 1}}                  | 0.03315963 | 0.38306793 | {ARMB: {CC: 49, CT: 5}, APMB: {CC: 64, CT: 4}}                  | 0.507151279 | 1 |
| chr19:660448   | {African_American: {GG: 64, AG: 3}, Not_African_American: {GG: 61}}                         | 0.24575541 | 0.90275544 | {ARMB: {GG: 59}, APMB: {GG: 66, AG: 3}}                         | 0.248708169 | 1 |
| chr19:660455   | {African_American: {AA: 66, AG: 1}, Not_African_American: {AA: 61}}                         | 1          | 1          | {ARMB: {AA: 59}, APMB: {AA: 68, AG: 1}}                         | 1           | 1 |
| chr19:667131   | {African_American: {CC: 67}, Not_African_American: {CC: 60, CT: 1}}                         | 0.4765625  | 0.90275544 | {ARMB: {CC: 59}, APMB: {CC: 68, CT: 1}}                         | 1           | 1 |
| chr19:827957   | {African_American: {CC: 59, CT: 3, TT: 1}, Not_African_American: {CC: 61}}                  | 0.17954562 | 0.90275544 | {ARMB: {CC: 55, CT: 2, TT: 1}, APMB: {CC: 65, CT: 1}}           | 0.409860689 | 1 |
| chr19:828032   | {African_American: {CC: 65, CT: 1}, Not_African_American: {CC: 60, CT: 1}}                  | 1          | 1          | {ARMB: {CC: 58}, APMB: {CC: 67, CT: 2}}                         | 0.499812523 | 1 |
| chr19:828105   | {African_American: {GG: 58, AG: 5, AA: 1}, Not_African_American: {GG: 61}}                  | 0.04134999 | 0.47066016 | {ARMB: {GG: 54, AA: 1, AG: 1}, APMB: {GG: 65, AG: 4}}           | 0.266873567 | 1 |
| chr19:831398   | {African_American: {CC: 66, CT: 1}, Not_African_American: {CC: 61}}                         | 1          | 1          | {ARMB: {CC: 59}, APMB: {CC: 68, CT: 1}}                         | 1           | 1 |
| chr19:831402   | {African_American: {GG: 65, AG: 1}, Not_African_American: {GG: 57, AG: 2, AA: 1}}           | 0.41494886 | 0.90275544 | {ARMB: {GG: 55, AG: 2, AA: 1}, APMB: {GG: 67, AG: 1}}           | 0.40598404  | 1 |
| chr19:856015   | {African_American: {GG: 59, AG: 6}, Not_African_American: {GG: 61}}                         | 0.02804464 | 0.33555035 | {ARMB: {GG: 56, AG: 3}, APMB: {GG: 64, AG: 3}}                  | 1           | 1 |
| chr19:1012052  | {African_American: {GG: 66, AG: 1}, Not_African_American: {GG: 61}}                         | 1          | 1          | {ARMB: {GG: 59}, APMB: {GG: 68, AG: 1}}                         | 1           | 1 |
| chr19:1012121  | {African_American: {GG: 57, AG: 6}, Not_African_American: {GG: 48, AG: 9}}                  | 0.40872747 | 0.90275544 | {ARMB: {GG: 44, AG: 7}, APMB: {GG: 61, AG: 8}}                  | 0.784245118 | 1 |
| chr19:1012158  | {African_American: {CC: 65, CT: 1}, Not_African_American: {CC: 61}}                         | 1          | 1          | {ARMB: {CC: 59}, APMB: {CC: 67, CT: 1}}                         | 1           | 1 |
| chr19:1012192  | {African_American: {CC: 67}, Not_African_American: {CC: 60, CT: 1}}                         | 0.4765625  | 0.90275544 | {ARMB: {CC: 59}, APMB: {CC: 68, CT: 1}}                         | 1           | 1 |
| chr19:1154629  | {African_American: {CC: 66, CT: 1}, Not_African_American: {CC: 61}}                         | 1          | 1          | {ARMB: {CC: 58, CT: 1}, APMB: {CC: 69}}                         | 0.4609375   | 1 |
| chr19:1882286  | {African_American: {CC: 62, CT: 4}, Not_African_American: {CC: 60}}                         | 0.12072534 | 0.81817066 | {ARMB: {CC: 54, CT: 4}, APMB: {CC: 68}}                         | 0.042388321 | 1 |
| chr19:2360198  | {African_American: {CC: 67}, Not_African_American: {CC: 60, CT: 1}}                         | 0.4765625  | 0.90275544 | {ARMB: {CC: 59}, APMB: {CC: 68, CT: 1}}                         | 1           | 1 |
| chr19:2360201  | {African_American: {CC: 67}, Not_African_American: {CC: 60, CT: 1}}                         | 0.4765625  | 0.90275544 | {ARMB: {CC: 59}, APMB: {CC: 68, CT: 1}}                         | 1           | 1 |
| chr19:2634588  | {African_American: {GG: 64, AG: 3}, Not_African_American: {GG: 61}}                         | 0.24575541 | 0.90275544 | {ARMB: {GG: 59}, APMB: {GG: 67, AG: 2}}                         | 1           | 1 |
| chr19:2634611  | {African_American: {GG: 66, AG: 1}, Not_African_American: {GG: 61}}                         | 1          | 1          | {ARMB: {GG: 59}, APMB: {GG: 68, AG: 1}}                         | 1           | 1 |
| chr19:2634629  | {African_American: {GG: 65, AG: 1}, Not_African_American: {GG: 61}}                         | 1          | 1          | {ARMB: {GG: 58}, APMB: {GG: 68, AG: 1}}                         | 1           | 1 |
| chr19:3094361  | {African_American: {TT: 66, GG: 1}, Not_African_American: {TT: 61}}                         | 1          | 1          | {ARMB: {TT: 58, GG: 1}, APMB: {TT: 69}}                         | 0.4609375   | 1 |
| chr19:3189721  | {African_American: {CC: 64, CT: 1}, Not_African_American: {CC: 61}}                         | 1          | 1          | {ARMB: {CC: 58, CT: 1}, APMB: {CC: 67}}                         | 0.468253968 | 1 |
| chr19:3468000  | {African_American: {GG: 66, AG: 1}, Not_African_American: {GG: 61}}                         | 1          | 1          | {ARMB: {GG: 59}, APMB: {GG: 68, AG: 1}}                         | 1           | 1 |
| chr19:5189286  | {African_American: {CC: 62, CT: 3}, Not_African_American: {CC:                              |            |            |                                                                 |             |   |

|                |                                                                                             |            |            |                                                                 |             |   |   |
|----------------|---------------------------------------------------------------------------------------------|------------|------------|-----------------------------------------------------------------|-------------|---|---|
| chr19:17846109 | {African_American: {CC: 60, CT: 3}, Not_African_American: {CC: 61}}                         | 0.24409913 | 0.90275544 | {ARMB: {CC: 55, CT: 1}, APMB: {CC: 66, CT: 2}}                  | 1           | 1 | 1 |
| chr19:17846133 | {African_American: {CC: 66, GG: 1}, Not_African_American: {CC: 61}}                         | 1          | 1          | {ARMB: {CC: 59}, APMB: {CC: 68, GG: 1}}                         | 1           | 1 | 1 |
| chr19:17846168 | {African_American: {CC: 67}, Not_African_American: {CC: 59, CT: 2}}                         | 0.22514764 | 0.90275544 | {ARMB: {CC: 59}, APMB: {CC: 67, CT: 2}}                         | 0.49913878  | 1 | 1 |
| chr19:35785100 | {African_American: {CC: 60, CT: 1}, Not_African_American: {CC: 57, CT: 3}}                  | 0.3645392  | 0.90275544 | {ARMB: {CC: 53, CT: 2}, APMB: {CC: 64, CT: 2}}                  | 1           | 1 | 1 |
| chr19:40733137 | {African_American: {TT: 63, CT: 3}, Not_African_American: {TT: 61}}                         | 0.24521935 | 0.90275544 | {ARMB: {TT: 58, CT: 1}, APMB: {TT: 66, CT: 2}}                  | 1           | 1 | 1 |
| chr19:40733204 | {African_American: {GG: 66, AG: 1}, Not_African_American: {GG: 61}}                         | 1          | 1          | {ARMB: {GG: 59}, APMB: {GG: 68, AG: 1}}                         | 1           | 1 | 1 |
| chr19:41363968 | {African_American: {TT: 66, CT: 1}, Not_African_American: {TT: 61}}                         | 1          | 1          | {ARMB: {TT: 59}, APMB: {TT: 68, CT: 1}}                         | 1           | 1 | 1 |
| chr19:41877253 | {African_American: {TT: 67}, Not_African_American: {TT: 60, GG: 1}}                         | 0.4765625  | 0.90275544 | {ARMB: {TT: 59}, APMB: {TT: 68, GG: 1}}                         | 1           | 1 | 1 |
| chr19:41877254 | {African_American: {CC: 67}, Not_African_American: {CC: 60, AA: 1}}                         | 0.4765625  | 0.90275544 | {ARMB: {CC: 59}, APMB: {CC: 68, AA: 1}}                         | 1           | 1 | 1 |
| chr19:45336792 | {African_American: {GG: 61, AG: 1}, Not_African_American: {GG: 57, AG: 2}}                  | 0.61258073 | 1          | {ARMB: {GG: 53, AG: 2}, APMB: {GG: 65, AG: 1}}                  | 0.590336134 | 1 | 1 |
| chr19:45611770 | {African_American: {GG: 65, AG: 2}, Not_African_American: {GG: 61}}                         | 0.49717028 | 0.90275544 | {ARMB: {GG: 59}, APMB: {GG: 67, AG: 2}}                         | 0.49913878  | 1 | 1 |
| chr19:47726147 | {African_American: {CC: 67}, Not_African_American: {CC: 60, CT: 1}}                         | 0.4765625  | 0.90275544 | {ARMB: {CC: 58, CT: 1}, APMB: {CC: 69}}                         | 0.4609375   | 1 | 1 |
| chr19:47726256 | {African_American: {TT: 64, CT: 1}, Not_African_American: {TT: 60, CT: 1}}                  | 1          | 1          | {ARMB: {TT: 58}, APMB: {TT: 66, CT: 2}}                         | 0.499174603 | 1 | 1 |
| chr19:47726274 | {African_American: {GG: 61, AG: 3}, Not_African_American: {GG: 61}}                         | 0.243871   | 0.90275544 | {ARMB: {GG: 58, AG: 1}, APMB: {GG: 64, AG: 2}}                  | 1           | 1 | 1 |
| chr19:48573374 | {African_American: {GG: 63, AG: 2}, Not_African_American: {GG: 61}}                         | 0.49650794 | 0.90275544 | {ARMB: {GG: 56, AG: 1}, APMB: {GG: 68, AG: 1}}                  | 1           | 1 | 1 |
| chr19:48573430 | {African_American: {GG: 36, AG: 23, AA: 6}, Not_African_American: {AG: 23, AA: 17, GG: 15}} | 0.00131117 | 0.03758674 | {ARMB: {GG: 21, AA: 20, AA: 15}, APMB: {GG: 30, AG: 26, AA: 8}} | 0.139028507 | 1 | 1 |
| chr19:50418966 | {African_American: {CC: 67}, Not_African_American: {CC: 60, AA: 1}}                         | 0.4765625  | 0.90275544 | {ARMB: {CC: 58, AA: 1}, APMB: {CC: 69}}                         | 0.4609375   | 1 | 1 |
| chr19:53984660 | {African_American: {TT: 66, AA: 1}, Not_African_American: {TT: 61}}                         | 1          | 1          | {ARMB: {TT: 59}, APMB: {TT: 68, AA: 1}}                         | 1           | 1 | 1 |
| chr19:53992231 | {African_American: {TT: 67}, Not_African_American: {TT: 60, AA: 1}}                         | 0.4765625  | 0.90275544 | {ARMB: {TT: 59}, APMB: {TT: 68, AA: 1}}                         | 1           | 1 | 1 |
| chr19:53992266 | {African_American: {TT: 66, AA: 1}, Not_African_American: {TT: 61}}                         | 1          | 1          | {ARMB: {TT: 58, AA: 1}, APMB: {TT: 69}}                         | 0.4609375   | 1 | 1 |
| chr19:53992268 | {African_American: {TT: 66, AA: 1}, Not_African_American: {TT: 61}}                         | 1          | 1          | {ARMB: {TT: 58, AA: 1}, APMB: {TT: 69}}                         | 0.4609375   | 1 | 1 |
| chr19:53992271 | {African_American: {CC: 66, AA: 1}, Not_African_American: {CC: 61}}                         | 1          | 1          | {ARMB: {CC: 58, AA: 1}, APMB: {CC: 69}}                         | 0.4609375   | 1 | 1 |
| chr19:55372491 | {African_American: {GG: 65}, Not_African_American: {GG: 58, AG: 1}}                         | 0.47580645 | 0.90275544 | {ARMB: {GG: 58}, APMB: {GG: 65, AG: 1}}                         | 1           | 1 | 1 |
| chr19:55372541 | {African_American: {GG: 60, AG: 4, AA: 1}, Not_African_American: {GG: 61}}                  | 0.1197802  | 0.81817066 | {ARMB: {GG: 55, AG: 3, AA: 1}, APMB: {GG: 66, AG: 1}}           | 0.221936581 | 1 | 1 |
| chr19:55372592 | {African_American: {CC: 53, CT: 6, TT: 2}, Not_African_American: {CC: 57, CT: 2}}           | 0.1373195  | 0.90275544 | {ARMB: {CC: 53, CT: 3}, APMB: {CC: 57, CT: 5, TT: 2}}           | 0.560186876 | 1 | 1 |
| chr19:56567435 | {African_American: {TT: 66, GG: 1}, Not_African_American: {TT: 61}}                         | 1          | 1          | {ARMB: {TT: 59}, APMB: {TT: 68, GG: 1}}                         | 1           | 1 | 1 |
| chr19:58102129 | {African_American: {GG: 60, AG: 3}, Not_African_American: {GG: 61}}                         | 0.24409913 | 0.90275544 | {ARMB: {GG: 56, AG: 1}, APMB: {GG: 65, AG: 2}}                  | 1           | 1 | 1 |
| chr2:1267742   | {African_American: {TT: 61, AG: 1}, Not_African_American: {GG: 61}}                         | 1          | 1          | {ARMB: {GG: 57}, APMB: {GG: 65, AG: 1}}                         | 1           | 1 | 1 |
| chr2:2649253   | {African_American: {GG: 44, AG: 11, AA: 4}, Not_African_American: {GG: 60}}                 | 9.6385E-06 | 0.0006782  | {ARMB: {GG: 54, AG: 4, AA: 1}, APMB: {GG: 50, AG: 7, AA: 3}}    | 0.37503724  | 1 | 1 |
| chr2:3280281   | {African_American: {CC: 64, CT: 2}, Not_African_American: {CC: 51, TT: 2, CT: 1}}           | 0.40072639 | 0.90275544 | {ARMB: {CC: 53, CT: 1}, APMB: {CC: 62, CT: 2, TT: 1}}           | 1           | 1 | 1 |
| chr2:9138786   | {African_American: {CC: 65, CT: 1}, Not_African_American: {CC: 61}}                         | 1          | 1          | {ARMB: {CC: 57, CT: 1}, APMB: {CC: 69}}                         | 0.456692913 | 1 | 1 |
| chr2:9138787   | {African_American: {GG: 66, AG: 1}, Not_African_American: {GG: 61}}                         | 1          | 1          | {ARMB: {GG: 59}, APMB: {GG: 68, AG: 1}}                         | 1           | 1 | 1 |
| chr2:9138856   | {African_American: {GG: 66, AG: 1}, Not_African_American: {GG: 60}}                         | 1          | 1          | {ARMB: {GG: 59}, APMB: {GG: 67, AG: 1}}                         | 1           | 1 | 1 |
| chr2:9138866   | {African_American: {CC: 66, CT: 1}, Not_African_American: {CC: 61}}                         | 1          | 1          | {ARMB: {CC: 59}, APMB: {CC: 68, CT: 1}}                         | 1           | 1 | 1 |
| chr2:10044557  | {African_American: {CC: 67}, Not_African_American: {CC: 58, CT: 3}}                         | 0.10542627 | 0.81817066 | {ARMB: {CC: 56, CT: 3}, APMB: {CC: 69}}                         | 0.095229307 | 1 | 1 |
| chr2:10880683  | {African_American: {CC: 35, CT: 17, TT: 8}, Not_African_American: {CC: 45, CT: 12}}         | 0.0037363  | 0.07610248 | {ARMB: {CC: 43, CT: 8, TT: 2}, APMB: {CC: 37, CT: 21, TT: 6}}   | 0.024934583 | 1 | 1 |
| chr2:10880691  | {African_American: {CC: 66, CT: 1}, Not_African_American: {CC: 53, CT: 8}}                  | 0.01350296 | 0.19002349 | {ARMB: {CC: 53, CT: 6}, APMB: {CC: 66, CT: 3}}                  | 0.300200889 | 1 | 1 |
| chr2:12067081  | {African_American: {CC: 56, CT: 7}, Not_African_American: {CC: 61}}                         | 0.01314566 | 0.19002349 | {ARMB: {CC: 54, CT: 3}, APMB: {CC: 63, CT: 4}}                  | 1           | 1 | 1 |
| chr2:12854560  | {African_American: {CC: 51, CT: 10, TT: 1}, Not_African_American: {CC: 37, CT: 12, TT: 5}}  | 0.11298269 | 0.81817066 | {ARMB: {CC: 39, CT: 13}, APMB: {CC: 49, CT: 9, TT: 6}}          | 0.027223145 | 1 | 1 |
| chr2:68157811  | {African_American: {CC: 66}, Not_African_American: {CC: 57, GG: 1}}                         | 0.46774194 | 0.90275544 | {ARMB: {CC: 57}, APMB: {CC: 66, GG: 1}}                         | 1           | 1 | 1 |
| chr2:68157903  | {African_American: {TT: 66, AA: 1}, Not_African_American: {TT: 61}}                         | 1          | 1          | {ARMB: {TT: 59}, APMB: {TT: 68, AA: 1}}                         | 1           | 1 | 1 |
| chr2:68157913  | {African_American: {CC: 66, AA: 1}, Not_African_American: {CC: 61}}                         | 1          | 1          | {ARMB: {CC: 58, AA: 1}, APMB: {CC: 69}}                         | 0.4609375   | 1 | 1 |
| chr2:68157920  | {African_American: {TT: 67}, Not_African_American: {TT: 60, AA: 1}}                         | 0.4765625  | 0.90275544 | {ARMB: {TT: 58, AA: 1}, APMB: {TT: 69}}                         | 0.4609375   | 1 | 1 |
| chr2:94871585  | {African_American: {GG: 66, AG: 1}, Not_African_American: {GG: 61}}                         | 1          | 1          | {ARMB: {GG: 58, AG: 1}, APMB: {GG: 69}}                         | 0.4609375   | 1 | 1 |
| chr2:94871641  | {African_American: {CC: 67}, Not_African_American: {CC: 59, CT: 2}}                         | 0.22514764 | 0.90275544 | {ARMB: {CC: 58, CT: 1}, APMB: {CC: 68, CT: 1}}                  | 1           | 1 | 1 |
| chr2:94871670  | {African_American: {AA: 66, AG: 1}, Not_African_American: {AA: 60}}                         | 1          | 1          | {ARMB: {AA: 57, AG: 1}, APMB: {AA: 69}}                         | 0.456692913 | 1 | 1 |
| chr2:97713531  | {African_American: {TT: 67}, Not_African_American: {TT: 60, CT: 1}}                         | 0.4765625  | 0.90275544 | {ARMB: {TT: 58, CT: 1}, APMB: {TT: 69}}                         | 0.4609375   | 1 | 1 |
| chr2:111716374 | {African_American: {TT: 67}, Not_African_American: {TT: 60, CT: 1}}                         | 0.4765625  | 0.90275544 | {ARMB: {TT: 58, CT: 1}, APMB: {TT: 69}}                         | 0.4609375   | 1 | 1 |
| chr2:127631769 | {African_American: {GG: 66, AG: 1}, Not_African_American: {GG: 60, AG: 1}}                  | 1          | 1          | {ARMB: {GG: 58, AG: 1}, APMB: {GG: 68, AG: 1}}                  | 1           | 1 | 1 |
| chr2:128670620 | {African_American: {CC: 66, AA: 1}, Not_African_American: {CC: 61}}                         | 1          | 1          | {ARMB: {CC: 59}, APMB: {CC: 68, AA: 1}}                         | 1           | 1 | 1 |
| chr2:128670681 | {African_American: {CC: 64, CT: 2}, Not_African_American: {CC: 61}}                         | 0.4968129  | 0.90275544 | {ARMB: {CC: 58, CT: 1}, APMB: {CC: 67, CT: 1}}                  | 1           | 1 | 1 |
| chr2:203239044 | {African_American: {CC: 47, CT: 15, TT: 2}, Not_African_American: {CC: 61}}                 | 7.4123E-06 | 0.0005371  | {ARMB: {CC: 48, CT: 9, TT: 1}, APMB: {CC: 60, CT: 6, TT: 1}}    | 0.578427981 | 1 | 1 |
| chr2:219461456 | {African_American: {CC: 62, CT: 3}, Not_African_American: {CC: 61}}                         | 0.2447619  | 0.90275544 | {ARMB: {CC: 55, CT: 2}, APMB: {CC: 68, CT: 1}}                  | 0.589197224 | 1 | 1 |
| chr2:227667927 | {African_American: {GG: 55, AG: 9}, Not_African_American: {GG: 61}}                         | 0.00293535 | 0.0678263  | {ARMB: {GG: 55, AG: 3}, APMB: {GG: 61, AG: 6}}                  | 0.502327144 | 1 | 1 |
| chr2:233485922 | {African_American: {CC: 53, CT: 5, TT: 3}, Not_African_American: {CC: 59, CT: 1}}           | 0.04711107 | 0.4995064  | {ARMB: {CC: 50, CT: 3, TT: 3}, APMB: {CC: 62, CT: 3}}           | 0.198946691 | 1 | 1 |
| chr2:234098456 | {African_American: {AA: 62, AG: 1}, Not_African_American: {AA: 60}}                         | 1          | 1          | {ARMB: {AA: 58}, APMB: {AA: 64, AG: 1}}                         | 1           | 1 | 1 |
| chr2:234496610 | {African_American: {AA: 66, AG: 1}, Not_African_American: {AA: 61}}                         | 1          | 1          | {ARMB: {AA: 59}, APMB: {AA: 68, AG: 1}}                         | 1           | 1 | 1 |
| chr2:239312972 | {African_American: {CC: 37, CT: 13, TT: 8}, Not_African_American: {CC: 54, CT: 3, TT: 1}}   | 0.00048731 | 0.01904412 | {ARMB: {CC: 44, CT: 4, TT: 3}, APMB: {CC: 47, CT: 12, TT: 6}}   | 0.184685449 | 1 | 1 |
| chr2:239374108 | {African_American: {GG: 66, AG: 1}, Not_African_American: {GG: 61}}                         | 1          | 1          | {ARMB: {GG: 59}, APMB: {GG: 68, AG: 1}}                         | 1           | 1 | 1 |
| chr2:239509067 | {African_American: {CC: 36, CT: 19, TT: 2}, Not_African_American: {CC: 59, CT: 2}}          | 6.5006E-06 | 0.00055905 | {ARMB: {CC: 44, CT: 11, TT: 1}, APMB: {CC: 51, CT: 10, TT: 1}}  | 0.817675944 | 1 | 1 |
| chr2:239935894 | {African_American: {GG: 67}, Not_African_American: {GG: 57, AG: 1}}                         | 0.464      | 0.90275544 | {ARMB: {GG: 57, AG: 1}, APMB: {GG: 67}}                         | 0.464       | 1 | 1 |
| chr2:239936025 | {African_American: {CC: 58, CT: 6}, Not_African_American: {CC: 61}}                         | 0.02782139 | 0.3355035  | {ARMB: {CC: 53, CT: 4}, APMB: {CC: 66, CT: 2}}                  | 0.41028065  | 1 | 1 |
| chr2:240462070 | {African_American: {GG: 54, AG: 7, AA: 1}, Not_African_American: {GG: 60}}                  | 0.0092771  | 0.14360948 | {ARMB: {GG: 55, AG: 3, AA: 1}, APMB: {CC: 60, CT: 6, TT: 1}}    | 0.851682931 | 1 | 1 |
| chr2:240619475 | {African_American: {GG: 62, CT: 3}, Not_African_American: {GG: 61}}                         | 0.2447619  | 0.90275544 | {ARMB: {GG: 57, AG: 2}, APMB: {GG: 66, AG: 1}}                  | 0.599235023 | 1 | 1 |
| chr2:240851586 | {African_American: {GG: 56, AG: 8}, Not_African_American: {GG: 41, AG: 13, AA: 1}}          | 0.11688873 | 0.81817066 | {ARMB: {GG: 44, AG: 9}, APMB: {GG: 53, AG: 12, AA: 1}}          | 1           | 1 | 1 |
| chr2:240851632 | {African_American: {GG: 56, AG: 7, AA: 2}, Not_African_American: {GG: 61}}                  | 0.00452528 | 0.08145506 | {ARMB: {GG: 56, AG: 2, AA: 1}, APMB: {GG: 61, AG: 5, AA: 1}}    | 0.722238382 | 1 | 1 |
| chr2:240851678 | {African_American: {GG: 63, AG: 1}, Not_African_American: {GG: 60, AG: 1}}                  | 1          | 1          | {ARMB: {GG: 56, AG: 1}, APMB: {GG: 67, AG: 1}}                  | 1           | 1 | 1 |
| chr2:240851681 | {African_American: {CC: 65, CT: 2}, Not_African_American: {CC: 61}}                         | 0.49717028 | 0.90275544 | {ARMB: {CC: 57, CT: 2}, APMB: {CC: 69}}                         | 0.21050689  | 1 | 1 |
| chr2:240851686 | {African_American: {TT: 58, CT: 3}, Not_African_American: {TT: 60, CT: 1}}                  | 0.61872352 | 1          | {ARMB: {TT: 54, CT: 2}, APMB: {TT: 64, CT: 2}}                  | 1           | 1 | 1 |
| chr2:240906693 | {African_American: {CC: 64, CT: 1}, Not_African_American: {CC: 61}}                         | 1          | 1          | {ARMB: {CC: 57, CT: 1}, APMB: {CC: 68}}                         | 0.46031746  | 1 | 1 |
| chr2:240906766 | {African_American: {CC: 66, CT: 1}, Not_African_American: {CC: 61}}                         | 1          | 1          | {ARMB: {CC: 58, CT: 1}, APMB: {CC: 69}}                         | 0.4609375   | 1 | 1 |
| chr2:241200185 | {African_American: {GG: 67}, Not_African_American: {GG: 59, AG: 2}}                         | 0.22514764 | 0.90275544 | {ARMB: {GG: 58, AG: 1}, APMB: {GG: 68, AG: 1}}                  | 1           | 1 | 1 |
| chr2:241200201 | {African_American: {GG: 67}, Not_African_American: {GG: 60, AG: 1}}                         | 0.4765625  | 0.90275544 | {ARMB: {GG: 58, AG: 1}, APMB: {GG: 69}}                         | 0.4609375   | 1 | 1 |
| chr2:241751311 | {African_American: {GG: 66}, Not_African_American: {GG: 58, AG: 2}}                         | 0.2247619  | 0.90275544 | {ARMB: {GG: 56, AG: 2}, APMB: {GG: 68}}                         | 0.209904762 | 1 | 1 |
| chr2:241751314 | {African_American: {CC: 62, CT: 4}, Not_African_American: {CC: 60}}                         | 0.12072534 | 0.81817066 | {ARMB: {CC: 57, CT: 2}, APMB: {CC: 65, CT: 2}}                  | 1           | 1 | 1 |
| chr2:241768396 | {African_American: {GG: 62, AG: 1}, Not_African_American: {GG: 61}}                         | 1          | 1          | {ARMB: {GG: 57, AG: 1}, APMB: {GG: 66}}                         | 0.467741935 | 1 | 1 |
| chr2:241768492 | {African_American: {GG: 66, AG: 1}, Not_African_American: {GG: 60}}                         | 1          | 1          | {ARMB: {GG: 57, AG: 1}, APMB: {GG: 69}}                         | 0.456692913 | 1 | 1 |
| chr20:3470999  | {African_American: {CC: 48, CT: 7}, Not_African_American: {CC: 61}}                         | 0.0043521  | 0.08145506 | {ARMB: {CC: 50, CT: 4}, APMB: {CC: 59, CT: 3}}                  | 0.703248452 | 1 | 1 |
| chr20:3471024  | {African_American: {CC: 66, GG: 1}, Not_African_American: {CC: 61}}                         | 1          | 1          | {ARMB: {CC: 59}, APMB: {CC: 68, GG: 1}}                         | 1           | 1 | 1 |
| chr20:41136905 | {African_American: {TT: 66, AA: 1}, Not_African_American: {TT: 61}}                         | 1          | 1          | {ARMB: {TT: 58, AA: 1}, APMB: {TT: 69}}                         | 0.4609375   | 1 | 1 |
| chr20:56487729 | {African_American: {GG: 62, AG: 4}, Not_African_American: {GG: 60, AG: 1}}                  | 0.36695816 | 0.90275544 | {ARMB: {GG: 58, AG: 1}, APMB: {GG: 64, AG: 4}}                  | 0.371424056 | 1 | 1 |
| chr20:56487815 | {African_American: {CC: 61, CT: 3}, Not_African_American: {CC: 33, CT: 15, TT: 7}}          | 2.5077E-06 | 0.00024262 | {ARMB: {CC: 36, CT: 11, TT: 6}, APMB: {CC: 58, CT: 7, TT: 1}}   | 0.015213696 | 1 | 1 |
| chr20:57615669 | {African_American: {AA: 65, AG: 2}, Not_African_American: {AA: 61}}                         | 0.49717028 | 0.90275544 | {ARMB: {AA: 59}, APMB: {AA: 67, AG: 2}}                         | 0.49913878  | 1 | 1 |
| chr20:61349131 | {African_American: {TT: 56, CT: 5, CC: 1}, Not_African_American: {TT: 60, CT: 1}}           | 0.15958753 | 0.90275544 | {ARMB: {TT: 53, CT: 3, CC: 1}, APMB: {TT: 63, CT: 3}}           | 0.830337058 | 1 | 1 |
| chr20:61349181 | {African_American: {TT: 50, CT: 10, CC: 2}, Not_African_American: {TT: 39, CT: 17}}         | 0.07465146 | 0.69614736 | {ARMB: {TT: 45, CT: 10}, APMB: {TT: 44, CT: 17, CC: 2}}         | 0.197593863 | 1 | 1 |
| chr20:62952746 | {African_American: {CC: 67}, Not_African_American: {CC: 60, CT: 1}}                         | 0.4765625  | 0.90275544 | {ARMB: {CC: 59}, APMB: {CC: 68, CT: 1}}                         | 1           | 1 | 1 |
| chr21:13373561 | {African_American: {TT: 66, AA: 1}, Not_African_American: {TT: 59}}                         | 1          | 1          | {ARMB: {TT: 56, AA: 1}, APMB: {TT: 69}}                         | 0.452380952 | 1 | 1 |
| chr21:13373562 | {African_American: {CC: 63, AA: 1}, Not_African_American: {CC: 59}}                         | 1          | 1          | {ARMB: {CC: 56, AA: 1}, APMB: {CC: 66}}                         | 0.463414634 | 1 | 1 |
| chr21:13373564 | {African_American: {TT: 67}, Not_African_American: {TT: 60, AA: 1}}                         | 0.4765625  | 0.90275544 | {ARMB: {TT: 58, AA: 1}, APMB: {TT: 69}}                         | 0.4609375   | 1 | 1 |
| chr21:13373568 | {African_American: {CC: 65, CT: 1}, Not_African_American: {CC: 59}}                         | 1          | 1          | {ARMB: {CC: 58}, APMB: {CC: 66, CT: 1}}                         | 1           | 1 | 1 |
| chr21:13373570 | {African_American: {CC: 67}, Not_African_American: {CC: 59, AA: 1}}                         | 0.47244094 | 0.90275544 | {ARMB: {CC: 58, AA: 1}, APMB: {CC: 68}}                         | 0.4         |   |   |

|                |                                                                                             |            |            |                                                                 |             |   |
|----------------|---------------------------------------------------------------------------------------------|------------|------------|-----------------------------------------------------------------|-------------|---|
| chr21:44771365 | {African_American: {CC: 62, CT: 4}, Not_African_American: {CC: 60, CT: 1}}                  | 0.36695816 | 0.90275544 | {ARMB: {CC: 58, CT: 1}, APMB: {CC: 64, CT: 4}}                  | 0.371424056 | 1 |
| chr21:44933675 | {African_American: {GG: 59, AG: 1}, Not_African_American: {GG: 61}}                         | 0.49586777 | 0.90275544 | {ARMB: {GG: 54, AG: 1}, APMB: {GG: 66}}                         | 0.454545455 | 1 |
| chr21:44933682 | {African_American: {CC: 48, CT: 14}, Not_African_American: {CC: 54, CT: 5}}                 | 0.0449688  | 0.49301959 | {ARMB: {CC: 52, CT: 5}, APMB: {CC: 50, CT: 14}}                 | 0.077888592 | 1 |
| chr21:44933723 | {African_American: {GG: 63, AG: 2}, Not_African_American: {GG: 61}}                         | 0.49650794 | 0.90275544 | {ARMB: {GG: 57, AG: 1}, APMB: {GG: 67, AG: 1}}                  | 0.460317322 | 1 |
| chr21:44933758 | {African_American: {CC: 63, CT: 2}, Not_African_American: {CC: 61}}                         | 0.49650794 | 0.90275544 | {ARMB: {CC: 57, CT: 1}, APMB: {CC: 67, CT: 1}}                  | 0.460317322 | 1 |
| chr21:44933763 | {African_American: {GG: 45, AG: 15, AA: 2}, Not_African_American: {GG: 41, AG: 9, AA: 4}}   | 0.45795352 | 0.90275544 | {ARMB: {GG: 44, AG: 8, AA: 3}, APMB: {GG: 42, AG: 16, AA: 3}}   | 0.319328029 | 1 |
| chr21:44933828 | {African_American: {TT: 66}, Not_African_American: {TT: 54, CT: 4}}                         | 0.04522531 | 0.49301959 | {ARMB: {TT: 58, CT: 1}, APMB: {TT: 62, CT: 3}}                  | 0.620639081 | 1 |
| chr21:44987924 | {African_American: {GG: 40, AG: 18, AA: 2}, Not_African_American: {GG: 60}}                 | 2.8456E-07 | 3.1464E-05 | {ARMB: {GG: 47, AG: 8}, APMB: {GG: 53, AG: 10, AA: 2}}          | 0.654064529 | 1 |
| chr21:45386476 | {African_American: {GG: 65, AG: 1}, Not_African_American: {GG: 61}}                         | 1          | 1          | {ARMB: {GG: 58}, APMB: {GG: 68, AG: 1}}                         | 1           | 1 |
| chr21:45386548 | {African_American: {CC: 61, GG: 1}, Not_African_American: {CC: 61}}                         | 1          | 1          | {ARMB: {CC: 54, GG: 1}, APMB: {CC: 68}}                         | 0.447154472 | 1 |
| chr22:30472059 | {African_American: {GG: 63, AG: 1}, Not_African_American: {GG: 61}}                         | 1          | 1          | {ARMB: {GG: 57, AG: 1}, APMB: {GG: 67}}                         | 0.464       | 1 |
| chr22:30858019 | {African_American: {GG: 66, AG: 1}, Not_African_American: {GG: 55, AG: 4}}                  | 0.1849029  | 0.90275544 | {ARMB: {GG: 56, AG: 2}, APMB: {GG: 65, AG: 3}}                  | 1           | 1 |
| chr22:35328430 | {African_American: {CC: 65, CT: 2}, Not_African_American: {CC: 61}}                         | 0.49717028 | 0.90275544 | {ARMB: {CC: 59}, APMB: {CC: 67, CT: 2}}                         | 0.49913878  | 1 |
| chr22:37807865 | {African_American: {TT: 57, CT: 5}, Not_African_American: {TT: 61}}                         | 0.05748169 | 0.56650187 | {ARMB: {TT: 55, CT: 1}, APMB: {TT: 63, CT: 4}}                  | 0.3749167   | 1 |
| chr22:37849451 | {African_American: {TT: 67}, Not_African_American: {TT: 60, GG: 1}}                         | 0.4765625  | 0.90275544 | {ARMB: {TT: 59}, APMB: {TT: 68, GG: 1}}                         | 1           | 1 |
| chr22:41926850 | {African_American: {GG: 64, TT: 1}, Not_African_American: {GG: 56}}                         | 1          | 1          | {ARMB: {GG: 55}, APMB: {GG: 65, TT: 1}}                         | 1           | 1 |
| chr22:41926853 | {African_American: {GG: 67}, Not_African_American: {GG: 58, AG: 2}}                         | 0.22122235 | 0.90275544 | {ARMB: {GG: 57, AG: 2}, APMB: {GG: 68}}                         | 0.213848269 | 1 |
| chr22:41926882 | {African_American: {GG: 67}, Not_African_American: {GG: 59, AG: 1}}                         | 0.47244094 | 0.90275544 | {ARMB: {GG: 58}, APMB: {GG: 68, AG: 1}}                         | 1           | 1 |
| chr22:44396152 | {African_American: {CC: 65, CT: 1}, Not_African_American: {CC: 58}}                         | 1          | 1          | {ARMB: {CC: 59}, APMB: {CC: 64, CT: 1}}                         | 1           | 1 |
| chr22:44396163 | {African_American: {CC: 65, CT: 1}, Not_African_American: {CC: 59}}                         | 1          | 1          | {ARMB: {CC: 57, CT: 1}, APMB: {CC: 67}}                         | 0.464       | 1 |
| chr22:44396200 | {African_American: {GG: 66, AG: 1}, Not_African_American: {GG: 61}}                         | 1          | 1          | {ARMB: {GG: 59}, APMB: {GG: 68, AG: 1}}                         | 1           | 1 |
| chr22:45585333 | {African_American: {GG: 67}, Not_African_American: {GG: 60, AG: 1}}                         | 0.4765625  | 0.90275544 | {ARMB: {GG: 59}, APMB: {GG: 68, AG: 1}}                         | 1           | 1 |
| chr22:45585404 | {African_American: {GG: 66, AG: 1}, Not_African_American: {GG: 61}}                         | 1          | 1          | {ARMB: {GG: 58, AG: 1}, APMB: {GG: 69}}                         | 0.4609375   | 1 |
| chr22:45585446 | {African_American: {GG: 66, AG: 1}, Not_African_American: {GG: 61}}                         | 1          | 1          | {ARMB: {GG: 59}, APMB: {GG: 68, AG: 1}}                         | 1           | 1 |
| chr22:45585506 | {African_American: {GG: 62, AG: 1}, Not_African_American: {GG: 61}}                         | 1          | 1          | {ARMB: {GG: 56, AG: 1}, APMB: {GG: 67}}                         | 0.459677419 | 1 |
| chr22:46686548 | {African_American: {CC: 47, CT: 12}, Not_African_American: {CC: 58, CT: 2}}                 | 0.00432903 | 0.08145506 | {ARMB: {CC: 51, CT: 5}, APMB: {CC: 54, CT: 9}}                  | 0.407124958 | 1 |
| chr22:48872959 | {African_American: {CC: 61, CT: 5}, Not_African_American: {CC: 59, CT: 1}}                  | 0.21067311 | 0.90275544 | {ARMB: {CC: 56, CT: 3}, APMB: {CC: 64, CT: 3}}                  | 1           | 1 |
| chr22:48873131 | {African_American: {CC: 59, CT: 1}, Not_African_American: {CC: 61}}                         | 0.49586777 | 0.90275544 | {ARMB: {CC: 55, CT: 1}, APMB: {CC: 65}}                         | 0.462809917 | 1 |
| chr22:49164342 | {African_American: {GG: 67}, Not_African_American: {GG: 60, AG: 1}}                         | 0.4765625  | 0.90275544 | {ARMB: {GG: 59}, APMB: {GG: 68, AG: 1}}                         | 1           | 1 |
| chr22:49164403 | {African_American: {GG: 60, AG: 1}, Not_African_American: {GG: 61}}                         | 1          | 1          | {ARMB: {GG: 57, AG: 1}, APMB: {GG: 64}}                         | 0.475409836 | 1 |
| chr22:50035094 | {African_American: {GG: 60, AG: 6}, Not_African_American: {GG: 60}}                         | 0.02861282 | 0.33555035 | {ARMB: {GG: 55, AG: 4}, APMB: {GG: 65, AG: 2}}                  | 0.417522922 | 1 |
| chr22:50035296 | {African_American: {GG: 66, AG: 1}, Not_African_American: {GG: 61}}                         | 1          | 1          | {ARMB: {GG: 58, AG: 1}, APMB: {GG: 69}}                         | 0.46039375  | 1 |
| chr22:50035352 | {African_American: {CC: 61, CT: 6}, Not_African_American: {CC: 55, CT: 2}}                  | 0.2860987  | 0.90275544 | {ARMB: {CC: 53, CT: 3}, APMB: {CC: 63, CT: 5}}                  | 0.728298948 | 1 |
| chr22:50460235 | {African_American: {CC: 66, CT: 1}, Not_African_American: {CC: 61}}                         | 1          | 1          | {ARMB: {CC: 59}, APMB: {CC: 68, CT: 1}}                         | 1           | 1 |
| chr3:3109990   | {African_American: {GG: 56, AG: 6}, Not_African_American: {GG: 60}}                         | 0.02759406 | 0.33555035 | {ARMB: {GG: 55, AG: 2}, APMB: {GG: 61, AG: 4}}                  | 0.683809971 | 1 |
| chr3:3109996   | {African_American: {GG: 63, AG: 2}, Not_African_American: {GG: 61}}                         | 0.49650794 | 0.90275544 | {ARMB: {GG: 57, AG: 1}, APMB: {GG: 67, AG: 1}}                  | 1           | 1 |
| chr3:31981244  | {African_American: {TT: 63, CT: 1}, Not_African_American: {TT: 59, CT: 1}}                  | 1          | 1          | {ARMB: {TT: 54, CT: 2}, APMB: {TT: 68}}                         | 0.201940729 | 1 |
| chr3:32511621  | {African_American: {CC: 66, CT: 1}, Not_African_American: {CC: 61}}                         | 1          | 1          | {ARMB: {CC: 59}, APMB: {CC: 68, CT: 1}}                         | 1           | 1 |
| chr3:46208383  | {African_American: {GG: 65, AG: 1}, Not_African_American: {GG: 60}}                         | 1          | 1          | {ARMB: {GG: 58, AG: 1}, APMB: {GG: 67}}                         | 0.468253968 | 1 |
| chr3:46370968  | {African_American: {CC: 67}, Not_African_American: {CC: 60, GG: 1}}                         | 0.4765625  | 0.90275544 | {ARMB: {CC: 59}, APMB: {CC: 68, GG: 1}}                         | 1           | 1 |
| chr3:49708248  | {African_American: {GG: 67}, Not_African_American: {GG: 60, AG: 1}}                         | 0.4765625  | 0.90275544 | {ARMB: {GG: 59}, APMB: {GG: 68, AG: 1}}                         | 1           | 1 |
| chr3:49929805  | {African_American: {GG: 66}, Not_African_American: {GG: 60, AG: 1}}                         | 0.48031496 | 0.90275544 | {ARMB: {GG: 59}, APMB: {GG: 67, AG: 1}}                         | 1           | 1 |
| chr3:52845481  | {African_American: {CC: 27, TT: 25, CC: 10}, Not_African_American: {TT: 58}}                | 1.9885E-14 | 1.5391E-11 | {ARMB: {TT: 41, CT: 8, CC: 6}, APMB: {TT: 42, CT: 19, CC: 4}}   | 0.128520674 | 1 |
| chr3:52845525  | {African_American: {AA: 61, AG: 1}, Not_African_American: {AA: 55}}                         | 1          | 1          | {ARMB: {AA: 52}, APMB: {AA: 64, AG: 1}}                         | 1           | 1 |
| chr3:53152345  | {African_American: {CC: 66, CT: 1}, Not_African_American: {CC: 61}}                         | 1          | 1          | {ARMB: {CC: 58, CT: 1}, APMB: {CC: 69}}                         | 0.4609375   | 1 |
| chr3:53152416  | {African_American: {TT: 55, CT: 9}, Not_African_American: {TT: 61}}                         | 0.00293535 | 0.0678263  | {ARMB: {TT: 51, CT: 7}, APMB: {TT: 65, CT: 2}}                  | 0.080111055 | 1 |
| chr3:53152429  | {African_American: {CC: 63, CT: 2}, Not_African_American: {CC: 60, CT: 1}}                  | 1          | 1          | {ARMB: {CC: 56, CT: 1}, APMB: {CC: 67, CT: 2}}                  | 1           | 1 |
| chr3:58123501  | {African_American: {GG: 57, AG: 9}, Not_African_American: {GG: 61}}                         | 0.00306708 | 0.0678263  | {ARMB: {GG: 53, AG: 5}, APMB: {GG: 65, AG: 4}}                  | 0.730952027 | 1 |
| chr3:63905612  | {African_American: {GG: 60, AG: 6}, Not_African_American: {GG: 61}}                         | 0.02831755 | 0.33555035 | {ARMB: {GG: 55, AG: 4}, APMB: {GG: 66, AG: 2}}                  | 0.415281114 | 1 |
| chr3:108822716 | {African_American: {GG: 66}, Not_African_American: {CC: 59, GG: 1}}                         | 0.47619048 | 0.90275544 | {ARMB: {CC: 57, GG: 1}, APMB: {CC: 68}}                         | 0.460317322 | 1 |
| chr3:108822794 | {African_American: {TT: 65, CT: 1}, Not_African_American: {TT: 61}}                         | 1          | 1          | {ARMB: {TT: 58}, APMB: {TT: 68, CT: 1}}                         | 1           | 1 |
| chr3:120682219 | {African_American: {AA: 66, AG: 1}, Not_African_American: {AA: 61}}                         | 1          | 1          | {ARMB: {AA: 58, AG: 1}, APMB: {AA: 69}}                         | 0.4609375   | 1 |
| chr3:120682223 | {African_American: {CC: 66, CT: 1}, Not_African_American: {CC: 61}}                         | 1          | 1          | {ARMB: {CC: 59}, APMB: {CC: 68, CT: 1}}                         | 1           | 1 |
| chr3:120682318 | {African_American: {CC: 65, CT: 2}, Not_African_American: {CC: 59, CT: 2}}                  | 1          | 1          | {ARMB: {CC: 57, CT: 2}, APMB: {CC: 67, CT: 2}}                  | 1           | 1 |
| chr3:125832562 | {African_American: {GG: 52, AG: 9}, Not_African_American: {GG: 60, AG: 1}}                  | 0.01665957 | 0.22621947 | {ARMB: {GG: 50, AG: 6}, APMB: {GG: 62, AG: 4}}                  | 0.510171666 | 1 |
| chr3:126056179 | {African_American: {GG: 62, AG: 3}, Not_African_American: {GG: 60, AG: 1}}                  | 0.61970702 | 1          | {ARMB: {GG: 58, AG: 1}, APMB: {GG: 64, AG: 3}}                  | 0.622042786 | 1 |
| chr3:126056218 | {African_American: {CC: 60, CT: 4}, Not_African_American: {CC: 44, CT: 10}}                 | 0.04871276 | 0.50950909 | {ARMB: {CC: 51, CT: 4}, APMB: {CC: 53, CT: 10}}                 | 0.167602294 | 1 |
| chr3:191329453 | {African_American: {CC: 67}, Not_African_American: {CC: 59, CT: 1}}                         | 0.47244094 | 0.90275544 | {ARMB: {CC: 58}, APMB: {CC: 68, CT: 1}}                         | 1           | 1 |
| chr3:194876195 | {African_American: {GG: 55, AG: 10}, Not_African_American: {GG: 61}}                        | 0.00139725 | 0.03862405 | {ARMB: {GG: 53, AG: 5}, APMB: {GG: 63, AG: 5}}                  | 1           | 1 |
| chr3:197533514 | {African_American: {CC: 66, CT: 1}, Not_African_American: {CC: 61}}                         | 1          | 1          | {ARMB: {CC: 59}, APMB: {CC: 68, CT: 1}}                         | 1           | 1 |
| chr3:197547814 | {African_American: {CC: 30, CT: 27, TT: 3}, Not_African_American: {CC: 49, CT: 9, TT: 2}}   | 0.00038366 | 0.01649722 | {ARMB: {CC: 43, CT: 12, TT: 1}, APMB: {CC: 36, CT: 24, TT: 4}}  | 0.059291535 | 1 |
| chr3:197547856 | {African_American: {CC: 50, CT: 11, TT: 2}, Not_African_American: {CC: 58, CT: 2}}          | 0.00684432 | 0.11271291 | {ARMB: {CC: 53, CT: 3, TT: 1}, APMB: {CC: 55, CT: 10, TT: 1}}   | 0.136561472 | 1 |
| chr4:981746    | {African_American: {CC: 67}, Not_African_American: {CC: 60, CT: 1}}                         | 0.4765625  | 0.90275544 | {ARMB: {CC: 59}, APMB: {CC: 68, CT: 1}}                         | 1           | 1 |
| chr4:981776    | {African_American: {TT: 66, GG: 1}, Not_African_American: {TT: 61}}                         | 1          | 1          | {ARMB: {TT: 59}, APMB: {TT: 68, GG: 1}}                         | 1           | 1 |
| chr4:981788    | {African_American: {CC: 67}, Not_African_American: {CC: 60, AA: 1}}                         | 0.4765625  | 0.90275544 | {ARMB: {CC: 59}, APMB: {CC: 68, AA: 1}}                         | 1           | 1 |
| chr4:981797    | {African_American: {CC: 66, AA: 1}, Not_African_American: {CC: 61}}                         | 1          | 1          | {ARMB: {CC: 58, AA: 1}, APMB: {CC: 69}}                         | 0.4609375   | 1 |
| chr4:981823    | {African_American: {TT: 66, GG: 1}, Not_African_American: {TT: 61}}                         | 1          | 1          | {ARMB: {TT: 59}, APMB: {TT: 68, GG: 1}}                         | 1           | 1 |
| chr4:981826    | {African_American: {TT: 66, GG: 1}, Not_African_American: {TT: 61}}                         | 1          | 1          | {ARMB: {TT: 58, GG: 1}, APMB: {TT: 69}}                         | 0.4609375   | 1 |
| chr4:1092766   | {African_American: {GG: 66, AG: 1}, Not_African_American: {GG: 61}}                         | 1          | 1          | {ARMB: {GG: 59}, APMB: {GG: 68, AG: 1}}                         | 1           | 1 |
| chr4:1092801   | {African_American: {AG: 27, GG: 20, AA: 17}, Not_African_American: {GG: 49, AG: 6, AA: 11}} | 4.4007E-10 | 1.1354E-07 | {ARMB: {GG: 27, AG: 17, AA: 8}, APMB: {GG: 42, AG: 16, AA: 10}} | 0.485653505 | 1 |
| chr4:1092827   | {African_American: {GG: 67}, Not_African_American: {GG: 58, AG: 2}}                         | 0.22122235 | 0.90275544 | {ARMB: {GG: 56, AG: 2}, APMB: {GG: 69}}                         | 0.206599175 | 1 |
| chr4:1205170   | {African_American: {GG: 63, AG: 3}, Not_African_American: {GG: 61}}                         | 0.24521935 | 0.90275544 | {ARMB: {GG: 59}, APMB: {GG: 65, AG: 3}}                         | 0.247844019 | 1 |
| chr4:1533498   | {African_American: {AA: 66, AG: 1}, Not_African_American: {AA: 61}}                         | 1          | 1          | {ARMB: {AA: 59}, APMB: {AA: 68, AG: 1}}                         | 1           | 1 |
| chr4:1533661   | {African_American: {GG: 67}, Not_African_American: {GG: 59, AG: 1}}                         | 0.47244094 | 0.90275544 | {ARMB: {GG: 58, AG: 1}, APMB: {GG: 68}}                         | 0.464566929 | 1 |
| chr4:1533663   | {African_American: {CC: 66, CT: 1}, Not_African_American: {CC: 61}}                         | 1          | 1          | {ARMB: {CC: 59}, APMB: {CC: 68, CT: 1}}                         | 1           | 1 |
| chr4:5731792   | {African_American: {GG: 64, AG: 3}, Not_African_American: {GG: 60, AG: 1}}                  | 0.62072272 | 1          | {ARMB: {GG: 55, AG: 4}, APMB: {GG: 69}}                         | 0.04266273  | 1 |
| chr4:5731801   | {African_American: {GG: 61, AG: 1}, Not_African_American: {GG: 61}}                         | 1          | 1          | {ARMB: {GG: 57, AG: 1}, APMB: {GG: 65}}                         | 0.471544715 | 1 |
| chr4:5731811   | {African_American: {AA: 63, AG: 2}, Not_African_American: {AA: 51, AG: 1}}                  | 1          | 1          | {ARMB: {AA: 54, AG: 2}, APMB: {AA: 60, AG: 1}}                  | 0.606043132 | 1 |
| chr4:5731839   | {African_American: {GG: 65}, Not_African_American: {GG: 59, AG: 1}}                         | 0.48       | 0.90275544 | {ARMB: {GG: 58}, APMB: {GG: 66, AG: 1}}                         | 1           | 1 |
| chr4:7277944   | {African_American: {CC: 67}, Not_African_American: {CC: 53, CT: 3, TT: 1}}                  | 0.04210632 | 0.47232312 | {ARMB: {CC: 55, CT: 2, TT: 1}, APMB: {CC: 65, CT: 1}}           | 0.409860689 | 1 |
| chr4:7473855   | {African_American: {GG: 66, AG: 1}, Not_African_American: {GG: 61}}                         | 1          | 1          | {ARMB: {GG: 59}, APMB: {GG: 68, AG: 1}}                         | 1           | 1 |
| chr4:8286717   | {African_American: {CC: 66, CT: 1}, Not_African_American: {CC: 61}}                         | 1          | 1          | {ARMB: {CC: 58, CT: 1}, APMB: {CC: 69}}                         | 0.4609375   | 1 |
| chr4:8635503   | {African_American: {AA: 62, AG: 3}, Not_African_American: {AA: 60}}                         | 0.24516129 | 0.90275544 | {ARMB: {AA: 56, AG: 1}, APMB: {AA: 66, AG: 2}}                  | 1           | 1 |
| chr4:9566848   | {African_American: {GG: 65}, Not_African_American: {GG: 59, AG: 1}}                         | 0.48       | 0.90275544 | {ARMB: {GG: 58, AG: 1}, APMB: {GG: 66}}                         | 0.472       | 1 |
| chr4:73869391  | {African_American: {CC: 56, CT: 2}, Not_African_American: {CC: 57, CT: 4}}                  | 0.67997902 | 1          | {ARMB: {CC: 53, CT: 2}, APMB: {CC: 60, CT: 4}}                  | 0.685008368 | 1 |
| chr4:108399770 | {African_American: {GG: 67}, Not_African_American: {GG: 60, AG: 1}}                         | 0.4765625  | 0.90275544 | {ARMB: {GG: 59}, APMB: {GG: 68, AG: 1}}                         | 1           | 1 |
| chr4:159267797 | {African_American: {TT: 66, AA: 1}, Not_African_American: {TT: 61}}                         | 1          | 1          | {ARMB: {TT: 58, AA: 1}, APMB: {TT: 69}}                         | 0.4609375   | 1 |
| chr4:178415404 | {African_American: {AA: 59, GG: 1, AG: 1}, Not_African_American: {AA: 60}}                  | 1          | 1          | {ARMB: {AA: 56, GG: 1}, APMB: {AA: 63, AG: 1}}                  | 0.72231405  | 1 |
| chr5:3750985   | {African_American: {CC: 67}, Not_African_American: {CC: 60, CT: 1}}                         | 0.4765625  | 0.90275544 | {ARMB: {CC: 58, CT: 1}, APMB: {CC: 69}}                         | 0.4609375   | 1 |
| chr5:4879235   | {African_American: {CC: 51, CT: 11}, Not_African_American: {CC: 59, CT: 1}}                 | 0.00426055 | 0.08145506 | {ARMB: {CC: 52, CT: 4}, APMB: {CC: 58, CT: 8}}                  | 0.545454822 | 1 |
| chr5:4879236   | {African_American: {GG: 66}, Not_African_American: {GG: 58, AG: 3}}                         | 0.10795651 | 0.81817066 | {ARMB: {GG: 58, AG: 1}, APMB: {GG: 66, AG: 2}}                  | 1           | 1 |
| chr5:32203752  | {African_American: {CC: 66, GG: 1}, Not_African_American: {CC: 61}}                         | 1          | 1          | {ARMB: {CC: 58, GG: 1}, APMB: {CC: 69}}                         | 0.4609375   | 1 |
| chr5:32203821  | {African_American: {CC: 65, CT: 1}, Not_African_American: {CC: 61}}                         | 1          | 1          | {ARMB: {CC: 59}, APMB: {CC: 67, CT: 1}}                         | 1           | 1 |
| chr5:54392346  | {African_American: {GG: 64, AG: 2}, Not_African_American: {GG: 61}}                         | 0.4968129  | 0.90275544 | {ARMB: {GG: 58, AG: 1}, APMB: {GG: 67, AG: 1}}                  | 1           | 1 |
| chr5:76801588  | {African_American: {GG: 65, AG: 2}, Not_African_American: {GG: 61}}                         | 0.49717028 | 0.90275544 | {ARMB: {GG: 58, AG: 1}, APMB: {GG: 68, AG: 1}}                  | 1           | 1 |
| chr5:11224329  | {African_American: {CC: 66, AA: 1}, Not_African_American: {CC: 60}}                         | 1          | 1          | {ARMB: {CC: 59}, APMB: {CC: 67, AA: 1}}                         | 1           | 1 |
| chr5:132658121 | {African_American: {GG: 66, AA: 1}, Not_African_American: {TT: 61}}                         | 1          | 1          | {ARMB: {TT:                                                     |             |   |

|                |                                                                                             |             |            |                                                                  |             |   |
|----------------|---------------------------------------------------------------------------------------------|-------------|------------|------------------------------------------------------------------|-------------|---|
| chr5:135825756 | {African_American: {GG: 65, AG: 1}, Not_African_American: {GG: 61}}                         | 1           | 1          | [ARMB: {GG: 59}, APMB: {GG: 67, AG: 1}]                          | 1           | 1 |
| chr5:138213299 | {African_American: {GG: 67}, Not_African_American: {GG: 60, AG: 1}}                         | 0.4765625   | 0.90275544 | [ARMB: {GG: 58, AG: 1}, APMB: {GG: 69}]                          | 0.4609375   | 1 |
| chr5:149141544 | {African_American: {TT: 66, GG: 1}, Not_African_American: {TT: 61}}                         | 1           | 1          | [ARMB: {TT: 59}, APMB: {TT: 68, GG: 1}]                          | 1           | 1 |
| chr5:170149611 | {African_American: {GG: 66, AG: 1}, Not_African_American: {GG: 58}}                         | 1           | 1          | [ARMB: {GG: 59}, APMB: {GG: 65, AG: 1}]                          | 1           | 1 |
| chr5:170149645 | {African_American: {GG: 47, AG: 17}, Not_African_American: {GG: 33, AG: 20, AA: 2}}         | 0.11723872  | 0.81817066 | [ARMB: {GG: 28, AG: 23, AA: 2}, APMB: {GG: 52, AG: 14}]          | 0.003110806 | 1 |
| chr5:173795109 | {African_American: {TT: 57, CT: 7}, Not_African_American: {TT: 61}}                         | 0.01326158  | 0.19002349 | [ARMB: {TT: 54, CT: 3}, APMB: {TT: 64, CT: 4}]                   | 1           | 1 |
| chr5:173795253 | {African_American: {CC: 64, CT: 2}, Not_African_American: {CC: 61}}                         | 0.4968129   | 0.90275544 | [ARMB: {CC: 58, CT: 1}, APMB: {CC: 67, CT: 1}]                   | 1           | 1 |
| chr5:177386403 | {African_American: {CC: 60, CT: 3}, Not_African_American: {CC: 36, TT: 9, CT: 8}}           | 9.3795605   | 0.0051855  | [ARMB: {CC: 47, CT: 5, TT: 1}, APMB: {CC: 49, TT: 8, CT: 6}]     | 0.090910121 | 1 |
| chr5:177386404 | {African_American: {GG: 66, AG: 1}, Not_African_American: {GG: 61}}                         | 1           | 1          | [ARMB: {GG: 59}, APMB: {GG: 68, AG: 1}]                          | 1           | 1 |
| chr5:177599665 | {African_American: {GG: 66, AG: 1}, Not_African_American: {GG: 60, AG: 1}}                  | 1           | 1          | [ARMB: {GG: 59}, APMB: {GG: 67, AG: 2}]                          | 0.49913878  | 1 |
| chr5:178287030 | {African_American: {TT: 65, CT: 2}, Not_African_American: {TT: 61}}                         | 0.49717028  | 0.90275544 | [ARMB: {TT: 59}, APMB: {TT: 67, CT: 2}]                          | 1           | 1 |
| chr5:178287108 | {African_American: {CT: 28, CC: 24, TT: 10}, Not_African_American: {TT: 31, CT: 18, CC: 7}} | 1.1892E-05  | 0.00076704 | [ARMB: {TT: 23, CT: 20, CC: 11}, APMB: {CT: 26, CC: 20, TT: 18}] | 0.220197747 | 1 |
| chr5:178287122 | {African_American: {GG: 67}, Not_African_American: {GG: 60, AG: 1}}                         | 0.4765625   | 0.90275544 | [ARMB: {GG: 59}, APMB: {GG: 68, AG: 1}]                          | 1           | 1 |
| chr6:13711789  | {African_American: {GG: 66, AG: 1}, Not_African_American: {GG: 58, AG: 2}}                  | 0.60206974  | 1          | [ARMB: {GG: 56, AG: 2}, APMB: {GG: 68, AG: 1}]                   | 0.591847019 | 1 |
| chr6:14949717  | {African_American: {GG: 65, AG: 1}, Not_African_American: {GG: 61}}                         | 1           | 1          | [ARMB: {GG: 59}, APMB: {GG: 67, AG: 1}]                          | 1           | 1 |
| chr6:14949830  | {African_American: {GG: 65, AG: 1}, Not_African_American: {GG: 61}}                         | 1           | 1          | [ARMB: {GG: 59}, APMB: {GG: 67, AG: 1}]                          | 1           | 1 |
| chr6:25279039  | {African_American: {CC: 67}, Not_African_American: {CC: 60, AA: 1}}                         | 0.4765625   | 0.90275544 | [ARMB: {CC: 59}, APMB: {CC: 68, AA: 1}]                          | 1           | 1 |
| chr6:25279045  | {African_American: {CC: 66, AA: 1}, Not_African_American: {CC: 61}}                         | 1           | 1          | [ARMB: {CC: 58, AA: 1}, APMB: {CC: 69}]                          | 0.4609375   | 1 |
| chr6:32666627  | {African_American: {GG: 62, AA: 1}, Not_African_American: {GG: 60, AG: 1}}                  | 0.743902044 | 1          | [ARMB: {GG: 55, AA: 1, AG: 1}, APMB: {GG: 67}]                   | 0.209284028 | 1 |
| chr6:33075962  | {African_American: {TT: 67}, Not_African_American: {TT: 60, GG: 1}}                         | 0.4765625   | 0.90275544 | [ARMB: {TT: 59}, APMB: {TT: 68, GG: 1}]                          | 1           | 1 |
| chr6:33076025  | {African_American: {CC: 66, GG: 1}, Not_African_American: {CC: 61}}                         | 1           | 1          | [ARMB: {CC: 59}, APMB: {CC: 68, GG: 1}]                          | 1           | 1 |
| chr6:42966673  | {African_American: {CC: 67}, Not_African_American: {CC: 59, CT: 1}}                         | 0.47244094  | 0.90275544 | [ARMB: {CC: 58}, APMB: {CC: 68, CT: 1}]                          | 1           | 1 |
| chr6:42966785  | {African_American: {GG: 64, AG: 1}, Not_African_American: {GG: 58, AG: 1}}                  | 1           | 1          | [ARMB: {GG: 58}, APMB: {GG: 64, AG: 2}]                          | 0.498033045 | 1 |
| chr6:42966786  | {African_American: {AA: 65, AG: 1}, Not_African_American: {AA: 61}}                         | 1           | 1          | [ARMB: {AA: 57, AG: 1}, APMB: {AA: 69}]                          | 0.456692913 | 1 |
| chr6:42966787  | {African_American: {GG: 64, AG: 1}, Not_African_American: {GG: 58}}                         | 1           | 1          | [ARMB: {GG: 57}, APMB: {GG: 65, AG: 1}]                          | 1           | 1 |
| chr6:42966792  | {African_American: {TT: 67}, Not_African_American: {TT: 60, AA: 1}}                         | 0.4765625   | 0.90275544 | [ARMB: {TT: 59}, APMB: {TT: 68, AA: 1}]                          | 1           | 1 |
| chr6:42966793  | {African_American: {GG: 64, AG: 1}, Not_African_American: {GG: 57}}                         | 1           | 1          | [ARMB: {GG: 55, AG: 1}, APMB: {GG: 66}]                          | 0.459016393 | 1 |
| chr6:42966801  | {African_American: {TT: 67}, Not_African_American: {TT: 60, AA: 1}}                         | 0.4765625   | 0.90275544 | [ARMB: {TT: 59}, APMB: {TT: 68, AA: 1}]                          | 1           | 1 |
| chr6:42966806  | {African_American: {GG: 65, AG: 1}, Not_African_American: {GG: 58, AG: 1}}                  | 1           | 1          | [ARMB: {GG: 56, AG: 1}, APMB: {GG: 67, AG: 1}]                   | 1           | 1 |
| chr6:42966817  | {African_American: {GG: 60, AG: 1}, Not_African_American: {GG: 58}}                         | 1           | 1          | [ARMB: {GG: 55}, APMB: {GG: 63, AG: 1}]                          | 1           | 1 |
| chr6:42966824  | {African_American: {GG: 59, AA: 1}, Not_African_American: {GG: 56}}                         | 1           | 1          | [ARMB: {GG: 54}, APMB: {GG: 61, AA: 1}]                          | 1           | 1 |
| chr6:42966825  | {African_American: {TT: 66, AA: 1}, Not_African_American: {TT: 61}}                         | 1           | 1          | [ARMB: {TT: 59}, APMB: {TT: 68, AA: 1}]                          | 1           | 1 |
| chr6:42966834  | {African_American: {CC: 66, GG: 1}, Not_African_American: {CC: 61}}                         | 1           | 1          | [ARMB: {CC: 59}, APMB: {CC: 68, GG: 1}]                          | 1           | 1 |
| chr6:56099008  | {African_American: {CC: 67}, Not_African_American: {CC: 59, CT: 1}}                         | 0.47244094  | 0.90275544 | [ARMB: {CC: 59}, APMB: {CC: 67, CT: 1}]                          | 1           | 1 |
| chr6:56099165  | {African_American: {AA: 67}, Not_African_American: {AA: 58, AG: 1}}                         | 0.46825397  | 0.90275544 | [ARMB: {AA: 58, AG: 1}, APMB: {AA: 67}]                          | 0.468253968 | 1 |
| chr6:85450023  | {African_American: {TT: 67}, Not_African_American: {TT: 60, AA: 1}}                         | 0.4765625   | 0.90275544 | [ARMB: {TT: 58, AA: 1}, APMB: {TT: 69}]                          | 0.4609375   | 1 |
| chr6:85450061  | {African_American: {CC: 67}, Not_African_American: {CC: 58, CT: 2}}                         | 0.22122235  | 0.90275544 | [ARMB: {CC: 57, CT: 1}, APMB: {CC: 68, CT: 1}]                   | 1           | 1 |
| chr6:85450121  | {African_American: {CC: 66, GG: 1}, Not_African_American: {CC: 61}}                         | 1           | 1          | [ARMB: {CC: 59}, APMB: {CC: 68, GG: 1}]                          | 1           | 1 |
| chr6:88963603  | {African_American: {GG: 65, AG: 2}, Not_African_American: {GG: 61}}                         | 0.49717028  | 0.90275544 | [ARMB: {GG: 58, AG: 1}, APMB: {GG: 68, AG: 1}]                   | 1           | 1 |
| chr6:96521782  | {African_American: {CC: 66, AA: 1}, Not_African_American: {CC: 61}}                         | 1           | 1          | [ARMB: {CC: 59}, APMB: {CC: 68, AA: 1}]                          | 1           | 1 |
| chr6:96521784  | {African_American: {CC: 66, AA: 1}, Not_African_American: {CC: 61}}                         | 1           | 1          | [ARMB: {CC: 59}, APMB: {CC: 68, AA: 1}]                          | 1           | 1 |
| chr6:100881320 | {African_American: {GG: 60, AG: 4}, Not_African_American: {GG: 61}}                         | 0.11940834  | 0.81817066 | [ARMB: {GG: 57, AG: 1}, APMB: {GG: 64, AG: 3}]                   | 0.622882924 | 1 |
| chr6:136360972 | {African_American: {TT: 67}, Not_African_American: {TT: 56, CT: 1}}                         | 0.45967742  | 0.90275544 | [ARMB: {TT: 56, CT: 1}, APMB: {TT: 67}]                          | 0.459677419 | 1 |
| chr6:136360994 | {African_American: {TT: 66, CT: 1}, Not_African_American: {TT: 55}}                         | 1           | 1          | [ARMB: {TT: 54, CT: 1}, APMB: {TT: 67}]                          | 0.450819672 | 1 |
| chr6:136361049 | {African_American: {GG: 62}, Not_African_American: {GG: 58, AG: 1}}                         | 0.472       | 0.90275544 | [ARMB: {GG: 57}, APMB: {GG: 65, AG: 1}]                          | 1           | 1 |
| chr6:136361091 | {African_American: {CC: 66, AA: 1}, Not_African_American: {CC: 61}}                         | 1           | 1          | [ARMB: {CC: 59}, APMB: {CC: 68, AA: 1}]                          | 1           | 1 |
| chr6:136361094 | {African_American: {GG: 60, AA: 1, AG: 1}, Not_African_American: {GG: 55}}                  | 1           | 1          | [ARMB: {GG: 55, AG: 1}, APMB: {GG: 60, AA: 1}]                   | 0.730327144 | 1 |
| chr6:136361096 | {African_American: {TT: 66, AA: 1}, Not_African_American: {TT: 61}}                         | 1           | 1          | [ARMB: {TT: 59}, APMB: {TT: 68, AA: 1}]                          | 1           | 1 |
| chr6:136361102 | {African_American: {TT: 67}, Not_African_American: {TT: 60, GG: 1}}                         | 0.4765625   | 0.90275544 | [ARMB: {TT: 59}, APMB: {TT: 68, GG: 1}]                          | 1           | 1 |
| chr6:136361111 | {African_American: {CC: 67}, Not_African_American: {CC: 60, GG: 1}}                         | 0.4765625   | 0.90275544 | [ARMB: {CC: 58, GG: 1}, APMB: {CC: 69}]                          | 0.4609375   | 1 |
| chr6:136361113 | {African_American: {CC: 66}, Not_African_American: {CC: 60, AA: 1}}                         | 0.48031496  | 0.90275544 | [ARMB: {CC: 58, AA: 1}, APMB: {CC: 68}]                          | 0.464566929 | 1 |
| chr6:139771739 | {African_American: {CC: 63, CT: 1}, Not_African_American: {CC: 59}}                         | 1           | 1          | [ARMB: {CC: 56}, APMB: {CC: 66, CT: 1}]                          | 1           | 1 |
| chr6:139771752 | {African_American: {TT: 61, CT: 1}, Not_African_American: {TT: 59}}                         | 1           | 1          | [ARMB: {TT: 55}, APMB: {TT: 65, CT: 1}]                          | 1           | 1 |
| chr6:139771753 | {African_American: {CC: 65}, Not_African_American: {CC: 59, CT: 1}}                         | 0.48        | 0.90275544 | [ARMB: {CC: 57}, APMB: {CC: 67, CT: 1}]                          | 1           | 1 |
| chr6:139771878 | {African_American: {GG: 66, AG: 1}, Not_African_American: {GG: 61}}                         | 1           | 1          | [ARMB: {GG: 59}, APMB: {GG: 68, AG: 1}]                          | 1           | 1 |
| chr6:139771908 | {African_American: {GG: 62}, Not_African_American: {GG: 57, AG: 1}}                         | 0.48333333  | 0.90275544 | [ARMB: {GG: 54, AG: 1}, APMB: {GG: 65}]                          | 0.458333333 | 1 |
| chr6:150064928 | {African_American: {AA: 66}, Not_African_American: {AA: 60, AG: 1}}                         | 0.48031496  | 0.90275544 | [ARMB: {AA: 59}, APMB: {AA: 67, AG: 1}]                          | 1           | 1 |
| chr6:150301084 | {African_American: {TT: 63}, Not_African_American: {TT: 57, CT: 1}}                         | 0.47933884  | 0.90275544 | [ARMB: {TT: 55, CT: 1}, APMB: {TT: 65}]                          | 0.462809917 | 1 |
| chr6:150301093 | {African_American: {CC: 64, CT: 1}, Not_African_American: {CC: 56}}                         | 1           | 1          | [ARMB: {CC: 53}, APMB: {CC: 67, CT: 1}]                          | 1           | 1 |
| chr6:155256739 | {African_American: {AA: 63, GG: 1}, Not_African_American: {AA: 60}}                         | 1           | 1          | [ARMB: {AA: 57}, APMB: {AA: 66, GG: 1}]                          | 1           | 1 |
| chr6:155256752 | {African_American: {GG: 62}, Not_African_American: {GG: 58, AG: 1}}                         | 0.48760331  | 0.90275544 | [ARMB: {GG: 57}, APMB: {GG: 63, AG: 1}]                          | 1           | 1 |
| chr6:155256754 | {African_American: {AA: 61, AG: 1}, Not_African_American: {AA: 59}}                         | 1           | 1          | [ARMB: {AA: 57}, APMB: {AA: 63, AG: 1}]                          | 1           | 1 |
| chr6:155256767 | {African_American: {TT: 66, GG: 1}, Not_African_American: {TT: 61}}                         | 1           | 1          | [ARMB: {TT: 58, GG: 1}, APMB: {TT: 69}]                          | 0.4609375   | 1 |
| chr6:159316147 | {African_American: {GG: 61, AG: 2, AA: 1}, Not_African_American: {GG: 61}}                  | 0.49625806  | 0.90275544 | [ARMB: {GG: 56, AA: 1}, APMB: {GG: 66, AG: 2}]                   | 0.342149889 | 1 |
| chr6:159316164 | {African_American: {GG: 62, CC: 2}, Not_African_American: {GG: 49, CC: 4}}                  | 0.40798953  | 0.90275544 | [ARMB: {GG: 47, CC: 4}, APMB: {GG: 64, CC: 2}]                   | 0.401498599 | 1 |
| chr6:159316167 | {African_American: {CC: 65, CT: 1}, Not_African_American: {CC: 60}}                         | 1           | 1          | [ARMB: {CC: 57, CT: 1}, APMB: {CC: 68}]                          | 0.46031746  | 1 |
| chr6:159316298 | {African_American: {GG: 65, AG: 1}, Not_African_American: {GG: 60}}                         | 1           | 1          | [ARMB: {GG: 59}, APMB: {GG: 66, AG: 1}]                          | 1           | 1 |
| chr6:159316301 | {African_American: {GG: 65}, Not_African_American: {GG: 56, AA: 1}}                         | 0.46721311  | 0.90275544 | [ARMB: {GG: 56}, APMB: {GG: 65, AA: 1}]                          | 1           | 1 |
| chr6:168995812 | {African_American: {GG: 66, AG: 1}, Not_African_American: {GG: 61}}                         | 1           | 1          | [ARMB: {GG: 59}, APMB: {GG: 68, AG: 1}]                          | 1           | 1 |
| chr6:168995860 | {African_American: {TT: 63, CT: 1}, Not_African_American: {TT: 61}}                         | 1           | 1          | [ARMB: {TT: 57}, APMB: {TT: 67, CT: 1}]                          | 1           | 1 |
| chr6:169072569 | {African_American: {CC: 66, TT: 1}, Not_African_American: {CC: 61}}                         | 1           | 1          | [ARMB: {CC: 59}, APMB: {CC: 68, TT: 1}]                          | 1           | 1 |
| chr6:169072575 | {African_American: {CC: 66, TT: 1}, Not_African_American: {CC: 61}}                         | 1           | 1          | [ARMB: {CC: 59}, APMB: {CC: 68, TT: 1}]                          | 1           | 1 |
| chr6:169072588 | {African_American: {TT: 66, CC: 1}, Not_African_American: {TT: 61}}                         | 1           | 1          | [ARMB: {TT: 59}, APMB: {TT: 68, CC: 1}]                          | 1           | 1 |
| chr6:169072699 | {African_American: {AA: 67}, Not_African_American: {AA: 60, AG: 1}}                         | 0.4765625   | 0.90275544 | [ARMB: {AA: 59}, APMB: {AA: 68, AG: 1}]                          | 1           | 1 |
| chr6:169240429 | {African_American: {AA: 58, AG: 2}, Not_African_American: {AA: 61}}                         | 0.24380165  | 0.90275544 | [ARMB: {AA: 57, AG: 1}, APMB: {AA: 62, AG: 1}]                   | 1           | 1 |
| chr6:169240512 | {African_American: {GG: 62}, Not_African_American: {GG: 58, AG: 1}}                         | 1           | 1          | [ARMB: {GG: 54, AG: 1}, APMB: {GG: 62}]                          | 0.47008547  | 1 |
| chr6:169240524 | {African_American: {GG: 66, AG: 1}, Not_African_American: {GG: 60}}                         | 1           | 1          | [ARMB: {GG: 59}, APMB: {GG: 67, AG: 1}]                          | 1           | 1 |
| chr6:170023459 | {African_American: {CC: 63}, Not_African_American: {CC: 58, CT: 1}}                         | 0.48360656  | 0.90275544 | [ARMB: {CC: 55, CT: 1}, APMB: {CC: 66}]                          | 0.459016393 | 1 |
| chr6:170023465 | {African_American: {CC: 63}, Not_African_American: {CC: 58, CT: 1}}                         | 0.48360656  | 0.90275544 | [ARMB: {CC: 56, CT: 1}, APMB: {CC: 65}]                          | 0.467213115 | 1 |
| chr6:170023526 | {African_American: {CC: 63, CT: 1}, Not_African_American: {CC: 61}}                         | 1           | 1          | [ARMB: {CC: 59}, APMB: {CC: 65, CT: 1}]                          | 1           | 1 |
| chr6:170023606 | {African_American: {GG: 67}, Not_African_American: {GG: 60, AG: 1}}                         | 0.4765625   | 0.90275544 | [ARMB: {GG: 59}, APMB: {GG: 68, AG: 1}]                          | 1           | 1 |
| chr6:170023624 | {African_American: {AA: 65, AG: 1}, Not_African_American: {AA: 60}}                         | 1           | 1          | [ARMB: {AA: 58, AG: 1}, APMB: {AA: 67}]                          | 0.468253968 | 1 |
| chr6:170248094 | {African_American: {CC: 64}, Not_African_American: {CC: 56, CT: 1}}                         | 0.47107438  | 0.90275544 | [ARMB: {CC: 56}, APMB: {CC: 64, CT: 1}]                          | 1           | 1 |
| chr6:170248100 | {African_American: {TT: 66}, Not_African_American: {TT: 56, CT: 1}}                         | 0.46341463  | 0.90275544 | [ARMB: {TT: 57}, APMB: {TT: 65, CT: 1}]                          | 1           | 1 |
| chr6:170248190 | {African_American: {CC: 65, CT: 1}, Not_African_American: {CC: 57, TT: 2}}                  | 0.22077419  | 0.90275544 | [ARMB: {CC: 54, TT: 2, CT: 1}, APMB: {CC: 68}]                   | 0.092084972 | 1 |
| chr7:376941    | {African_American: {GG: 67}, Not_African_American: {GG: 60, AG: 1}}                         | 0.4765625   | 0.90275544 | [ARMB: {GG: 59}, APMB: {GG: 68, AG: 1}]                          | 1           | 1 |
| chr7:377077    | {African_American: {GG: 63, AG: 1}, Not_African_American: {GG: 60}}                         | 1           | 1          | [ARMB: {GG: 56}, APMB: {GG: 67, AG: 1}]                          | 1           | 1 |
| chr7:377084    | {African_American: {GG: 66}, Not_African_American: {GG: 60, AG: 1}}                         | 0.48031496  | 0.90275544 | [ARMB: {GG: 58}, APMB: {GG: 68, AG: 1}]                          | 1           | 1 |
| chr7:377085    | {African_American: {AA: 66}, Not_African_American: {AA: 60, AG: 1}}                         | 0.48031496  | 0.90275544 | [ARMB: {AA: 57, AG: 1}, APMB: {AA: 69}]                          | 0.456692913 | 1 |
| chr7:1116393   | {African_American: {CC: 62, CT: 1, TT: 1}, Not_African_American: {CC: 61}}                  | 1           | 1          | [ARMB: {CC: 57}, APMB: {CC: 66, CT: 1, TT: 1}]                   | 1           | 1 |
| chr7:1116469   | {African_American: {GG: 59, AG: 1}, Not_African_American: {GG: 61}}                         | 0.49586777  | 0.90275544 | [ARMB: {GG: 54}, APMB: {GG: 66, AG: 1}]                          | 1           | 1 |
| chr7:1331771   | {African_American: {CC: 60}, Not_African_American: {CC: 60, TT: 1}}                         | 1           | 1          | [ARMB: {CC: 54, TT: 1}, APMB: {CC: 66}]                          | 0.454545455 | 1 |
| chr7:1331795   | {African_American: {CC: 65}, Not_African_American: {CC: 60, CT: 1}}                         | 0.48412698  | 0.90275544 | [ARMB: {CC: 56, CT: 1}, APMB: {CC: 69}]                          | 0.452380952 | 1 |
| chr7:1331798   | {African_American: {CC: 65, CT: 2}, Not_African_American: {CC: 59}}                         | 0.49803175  | 0.90275544 | [ARMB: {CC: 57, CT: 2}, APMB: {CC: 67}]                          | 0.217269844 | 1 |
| chr7:1331942   | {African_American: {AA: 66}, Not_African_American: {AA: 58, AG: 1}}                         | 0.472       | 0.90275544 | [ARMB: {AA: 56, AG: 1}, APMB: {AA: 68}]                          | 0.456       | 1 |
| chr7:1492734   | {African_American: {CC: 52, AG: 6, AA: 2}, Not_African_American: {GG: 59}}                  | 0.00690006  | 0.10642654 | [ARMB: {GG: 49, AA: 2, AG: 2}, APMB: {GG: 62, AG: 4}]            | 0.304424233 | 1 |
| chr7:1492748   | {African_American: {CC: 45, CT: 9, TT: 3}, Not_African_American: {CC: 59, CT: 2}}           | 0.00619603  | 0.10642654 | [ARMB: {CC: 44, CT: 4, TT: 3}, APMB: {CC: 60, CT: 7}]            | 0.137226375 | 1 |
| chr7:1492772   | {African_American: {CC: 67}, Not_African_American: {CC: 60, CT: 1}}                         | 0.4765625   | 0.90275544 | [ARMB: {CC: 58, CT: 1}, APMB: {CC: 69}]                          | 0.4609375   | 1 |
| chr7:1492817   | {African_American: {TT: 67}, Not_African_American: {TT: 60, CT: 1}}                         | 0.4765625   | 0.90275544 | [ARMB: {TT: 59}, APMB: {TT: 68, CT: 1}]                          | 1           | 1 |
| chr7:1492840</ |                                                                                             |             |            |                                                                  |             |   |

|                |                                                                              |            |            |                                                  |             |   |
|----------------|------------------------------------------------------------------------------|------------|------------|--------------------------------------------------|-------------|---|
| chr7:1936548   | {African_American:[CC:66],Not_African_American:[CC:59,CT:1]}                 | 0.47619048 | 0.90275544 | {ARMB:[CC:57],APMB:[CC:68,CT:1]}                 | 1           | 1 |
| chr7:1936558   | {African_American:[TT:67],Not_African_American:[TT:59,CT:1]}                 | 0.47244094 | 0.90275544 | {ARMB:[TT:57,CT:1],APMB:[TT:69]}                 | 0.456692913 | 1 |
| chr7:1936623   | {African_American:[CC:66,CT:1],Not_African_American:[CC:61]}                 | 1          | 1          | {ARMB:[CC:59],APMB:[CC:68,CT:1]}                 | 1           | 1 |
| chr7:1936665   | {African_American:[AA:65,AG:1],Not_African_American:[AA:61]}                 | 1          | 1          | {ARMB:[AA:58],APMB:[AA:68,AG:1]}                 | 1           | 1 |
| chr7:2146074   | {African_American:[AA:65,AG:1],Not_African_American:[AA:61]}                 | 1          | 1          | {ARMB:[AA:57,AG:1],APMB:[AA:69]}                 | 0.456692913 | 1 |
| chr7:3043904   | {African_American:[GG:65,AG:1],Not_African_American:[GG:61]}                 | 1          | 1          | {ARMB:[GG:58],APMB:[GG:68,AG:1]}                 | 1           | 1 |
| chr7:4116340   | {African_American:[GG:66,AG:1],Not_African_American:[GG:61]}                 | 1          | 1          | {ARMB:[GG:59],APMB:[GG:68,AG:1]}                 | 1           | 1 |
| chr7:4116379   | {African_American:[GG:59,AG:4,AA:1],Not_African_American:[GG:52,AG:5]}       | 0.85955813 | 1          | {ARMB:[GG:50,AG:3,AA:1],APMB:[GG:61,AG:6]}       | 0.489600109 | 1 |
| chr7:4116390   | {African_American:[CC:66],Not_African_American:[CC:56,CT:1]}                 | 0.46341463 | 0.90275544 | {ARMB:[CC:55],APMB:[CC:67,CT:1]}                 | 1           | 1 |
| chr7:4116443   | {African_American:[CC:61,TT:1],Not_African_American:[CC:60]}                 | 1          | 1          | {ARMB:[CC:57],APMB:[CC:64,TT:1]}                 | 1           | 1 |
| chr7:4116446   | {African_American:[CC:61,TT:1],Not_African_American:[CC:60]}                 | 1          | 1          | {ARMB:[CC:57],APMB:[CC:64,TT:1]}                 | 1           | 1 |
| chr7:4235954   | {African_American:[TT:65],Not_African_American:[TT:60,CT:1]}                 | 0.48412698 | 0.90275544 | {ARMB:[TT:58],APMB:[TT:67,CT:1]}                 | 1           | 1 |
| chr7:4235957   | {African_American:[TT:66],Not_African_American:[TT:59,CT:1]}                 | 0.47619048 | 0.90275544 | {ARMB:[TT:58],APMB:[TT:67,CT:1]}                 | 1           | 1 |
| chr7:4236078   | {African_American:[AA:67],Not_African_American:[AA:60,AG:1]}                 | 0.4765625  | 0.90275544 | {ARMB:[AA:58,AG:1],APMB:[AA:69]}                 | 0.4609375   | 1 |
| chr7:4236091   | {African_American:[TT:66,AA:1],Not_African_American:[TT:61]}                 | 1          | 1          | {ARMB:[TT:59],APMB:[TT:68,AA:1]}                 | 1           | 1 |
| chr7:4236109   | {African_American:[GG:66],Not_African_American:[GG:56,AG:2]}                 | 0.21675846 | 0.90275544 | {ARMB:[GG:56,AG:1],APMB:[GG:66,AG:1]}            | 1           | 1 |
| chr7:4236115   | {African_American:[AA:66,GG:1],Not_African_American:[AA:58]}                 | 1          | 1          | {ARMB:[AA:58],APMB:[AA:66,GG:1]}                 | 1           | 1 |
| chr7:4236119   | {African_American:[AA:67],Not_African_American:[AA:58,GG:1]}                 | 0.46825397 | 0.90275544 | {ARMB:[AA:58],APMB:[AA:67,GG:1]}                 | 1           | 1 |
| chr7:4707144   | {African_American:[TT:65],Not_African_American:[TT:59,CT:1]}                 | 0.48       | 0.90275544 | {ARMB:[TT:58],APMB:[TT:66,CT:1]}                 | 1           | 1 |
| chr7:4707147   | {African_American:[CC:63,CT:2],Not_African_American:[CC:58]}                 | 0.49753432 | 0.90275544 | {ARMB:[CC:56],APMB:[CC:65,CT:2]}                 | 0.49993336  | 1 |
| chr7:4707152   | {African_American:[CC:65,CT:1],Not_African_American:[CC:58,CT:1]}            | 1          | 1          | {ARMB:[CC:57,CT:1],APMB:[CC:66,CT:1]}            | 1           | 1 |
| chr7:4707153   | {African_American:[CC:63],Not_African_American:[CC:57,CT:1]}                 | 0.47933884 | 0.90275544 | {ARMB:[CC:55,CT:1],APMB:[CC:65]}                 | 0.462809917 | 1 |
| chr7:4707154   | {African_American:[CC:65,CT:1],Not_African_American:[CC:56]}                 | 1          | 1          | {ARMB:[CC:56,CT:1],APMB:[CC:65]}                 | 0.467213115 | 1 |
| chr7:4707174   | {African_American:[TT:66,CT:1],Not_African_American:[TT:61]}                 | 1          | 1          | {ARMB:[TT:59],APMB:[TT:68,CT:1]}                 | 1           | 1 |
| chr7:5045837   | {African_American:[TT:67],Not_African_American:[TT:60,AA:1]}                 | 0.4765625  | 0.90275544 | {ARMB:[TT:59],APMB:[TT:68,AA:1]}                 | 1           | 1 |
| chr7:5045838   | {African_American:[CC:67],Not_African_American:[CC:59,GG:1]}                 | 0.47244094 | 0.90275544 | {ARMB:[CC:59],APMB:[CC:67,GG:1]}                 | 1           | 1 |
| chr7:5045865   | {African_American:[CC:67],Not_African_American:[CC:60,AA:1]}                 | 0.4765625  | 0.90275544 | {ARMB:[CC:59],APMB:[CC:68,AA:1]}                 | 1           | 1 |
| chr7:5045900   | {African_American:[TT:66,AA:1],Not_African_American:[TT:61]}                 | 1          | 1          | {ARMB:[TT:58,AA:1],APMB:[TT:69]}                 | 0.4609375   | 1 |
| chr7:6648198   | {African_American:[AA:65,AG:1],Not_African_American:[AA:60]}                 | 1          | 1          | {ARMB:[AA:59],APMB:[AA:66,AG:1]}                 | 1           | 1 |
| chr7:29645711  | {African_American:[TT:66,CT:1],Not_African_American:[TT:61]}                 | 1          | 1          | {ARMB:[TT:58,CT:1],APMB:[TT:69]}                 | 0.4609375   | 1 |
| chr7:29645806  | {African_American:[CC:52,CT:5,TT:2],Not_African_American:[CC:60,CT:1]}       | 0.04611009 | 0.49569219 | {ARMB:[CC:56,CT:1,TT:1],APMB:[CC:56,CT:5,TT:1]}  | 0.257232637 | 1 |
| chr7:29645809  | {African_American:[CC:42,CT:12,TT:7],Not_African_American:[CC:53,CT:4,TT:1]} | 0.00750113 | 0.12095571 | {ARMB:[CC:48,CT:6,TT:2],APMB:[CC:47,CT:10,TT:6]} | 0.291204604 | 1 |
| chr7:29645810  | {African_American:[GG:67],Not_African_American:[GG:60,AG:1]}                 | 0.4765625  | 0.90275544 | {ARMB:[GG:59],APMB:[GG:68,AG:1]}                 | 1           | 1 |
| chr7:55068619  | {African_American:[TT:66,CT:1],Not_African_American:[TT:57]}                 | 1          | 1          | {ARMB:[TT:58],APMB:[TT:65,CT:1]}                 | 1           | 1 |
| chr7:55068646  | {African_American:[CC:65],Not_African_American:[CC:60,CT:1]}                 | 0.48412698 | 0.90275544 | {ARMB:[CC:58,CT:1],APMB:[CC:67]}                 | 0.468253968 | 1 |
| chr7:55068682  | {African_American:[CC:63],Not_African_American:[CC:58,CT:1]}                 | 0.48360656 | 0.90275544 | {ARMB:[CC:57],APMB:[CC:64,CT:1]}                 | 1           | 1 |
| chr7:55068713  | {African_American:[GG:60,AG:2],Not_African_American:[GG:61]}                 | 0.49593496 | 0.90275544 | {ARMB:[GG:59],APMB:[GG:62,AG:2]}                 | 0.496734639 | 1 |
| chr7:64794466  | {African_American:[TT:66,AA:1],Not_African_American:[TT:61]}                 | 1          | 1          | {ARMB:[TT:59],APMB:[TT:68,AA:1]}                 | 1           | 1 |
| chr7:66503301  | {African_American:[CC:66,CT:1],Not_African_American:[CC:61]}                 | 1          | 1          | {ARMB:[CC:59],APMB:[CC:68,CT:1]}                 | 1           | 1 |
| chr7:7174462   | {African_American:[GG:66,AG:1],Not_African_American:[GG:59]}                 | 1          | 1          | {ARMB:[GG:58,AG:1],APMB:[GG:67]}                 | 0.468253968 | 1 |
| chr7:75912253  | {African_American:[CC:67],Not_African_American:[CC:60,AA:1]}                 | 0.4765625  | 0.90275544 | {ARMB:[CC:58,AA:1],APMB:[CC:69]}                 | 0.4609375   | 1 |
| chr7:75912290  | {African_American:[TT:66,GG:1],Not_African_American:[TT:61]}                 | 1          | 1          | {ARMB:[TT:59],APMB:[TT:68,GG:1]}                 | 1           | 1 |
| chr7:75912291  | {African_American:[CC:66,GG:1],Not_African_American:[CC:61]}                 | 1          | 1          | {ARMB:[CC:59],APMB:[CC:68,GG:1]}                 | 1           | 1 |
| chr7:128121707 | {African_American:[GG:59,AG:4],Not_African_American:[GG:61]}                 | 0.11912271 | 0.81817066 | {ARMB:[GG:54,AG:2],APMB:[GG:66,AG:2]}            | 1           | 1 |
| chr7:128121729 | {African_American:[CC:67,CT:1],Not_African_American:[CC:60]}                 | 1          | 1          | {ARMB:[CC:57,CT:1],APMB:[CC:66]}                 | 0.467741935 | 1 |
| chr7:12952812  | {African_American:[CC:57,CT:4],Not_African_American:[CC:61]}                 | 0.1188277  | 0.81817066 | {ARMB:[CC:53,CT:2],APMB:[CC:65,CT:2]}            | 1           | 1 |
| chr7:129528260 | {African_American:[TT:62,CT:1,CC:1],Not_African_American:[TT:61]}            | 1          | 1          | {ARMB:[TT:56,CT:1],APMB:[TT:67,CC:1]}            | 0.706064516 | 1 |
| chr7:129529240 | {African_American:[CC:63,CT:4],Not_African_American:[CC:61]}                 | 0.12076631 | 0.81817066 | {ARMB:[CC:57,CT:2],APMB:[CC:67,CT:2]}            | 1           | 1 |
| chr7:129529245 | {African_American:[GG:66,AG:1],Not_African_American:[GG:61]}                 | 1          | 1          | {ARMB:[GG:59],APMB:[GG:68,AG:1]}                 | 1           | 1 |
| chr7:134779647 | {African_American:[CC:66,AA:1],Not_African_American:[CC:61]}                 | 1          | 1          | {ARMB:[CC:59],APMB:[CC:68,AA:1]}                 | 1           | 1 |
| chr7:143408852 | {African_American:[GG:67],Not_African_American:[GG:60,AG:1]}                 | 0.4765625  | 0.90275544 | {ARMB:[GG:59],APMB:[GG:68,AG:1]}                 | 1           | 1 |
| chr7:149822008 | {African_American:[CC:62,CT:1],Not_African_American:[CC:55]}                 | 1          | 1          | {ARMB:[CC:56,CT:1],APMB:[CC:61]}                 | 0.483050847 | 1 |
| chr7:149822141 | {African_American:[GG:67],Not_African_American:[GG:59,AG:1]}                 | 0.47244094 | 0.90275544 | {ARMB:[GG:59],APMB:[GG:67,AG:1]}                 | 1           | 1 |
| chr7:149873920 | {African_American:[TT:66,AA:1],Not_African_American:[TT:61]}                 | 1          | 1          | {ARMB:[TT:59],APMB:[TT:68,AA:1]}                 | 1           | 1 |
| chr7:158252872 | {African_American:[CC:62,CT:1],Not_African_American:[CC:57,CT:1]}            | 1          | 1          | {ARMB:[CC:55],APMB:[CC:64,CT:2]}                 | 0.5         | 1 |
| chr7:158252987 | {African_American:[AA:67],Not_African_American:[AA:60,AG:1]}                 | 0.4765625  | 0.90275544 | {ARMB:[AA:59],APMB:[AA:68,AG:1]}                 | 1           | 1 |
| chr7:158279860 | {African_American:[CC:55,CT:5,TT:1],Not_African_American:[CC:61]}            | 0.02747342 | 0.33555035 | {ARMB:[CC:54,CT:2,TT:1],APMB:[CC:62,CT:3]}       | 0.821783802 | 1 |
| chr8:11501656  | {African_American:[TT:67],Not_African_American:[TT:60,AA:1]}                 | 0.4765625  | 0.90275544 | {ARMB:[TT:58,AA:1],APMB:[TT:69]}                 | 0.4609375   | 1 |
| chr8:11501659  | {African_American:[CC:49,CT:7,TT:3],Not_African_American:[CC:61]}            | 0.00054131 | 0.01904412 | {ARMB:[CC:50,CT:6,TT:1],APMB:[CC:60,TT:2,CT:1]}  | 0.080950041 | 1 |
| chr8:28029316  | {African_American:[TT:65,CT:1],Not_African_American:[TT:60]}                 | 1          | 1          | {ARMB:[TT:56,CT:1],APMB:[TT:69]}                 | 0.452380952 | 1 |
| chr8:28029459  | {African_American:[GG:65,AG:1],Not_African_American:[GG:59,AG:1]}            | 1          | 1          | {ARMB:[GG:59],APMB:[GG:65,AG:2]}                 | 0.498031746 | 1 |
| chr8:28029460  | {African_American:[GG:65,AG:1],Not_African_American:[GG:60]}                 | 1          | 1          | {ARMB:[GG:58],APMB:[GG:67,AG:1]}                 | 1           | 1 |
| chr8:28029467  | {African_American:[GG:54,AG:3],Not_African_American:[GG:61]}                 | 0.1096225  | 0.81817066 | {ARMB:[GG:55,AG:1],APMB:[GG:60,AG:2]}            | 1           | 1 |
| chr8:28029468  | {African_American:[GG:54,AG:2],Not_African_American:[GG:60]}                 | 0.23088456 | 0.90275544 | {ARMB:[GG:56,AG:1],APMB:[GG:58,AG:1]}            | 1           | 1 |
| chr8:28317297  | {African_American:[CC:66,GG:1],Not_African_American:[CC:61]}                 | 1          | 1          | {ARMB:[CC:59],APMB:[CC:68,GG:1]}                 | 1           | 1 |
| chr8:29711230  | {African_American:[AA:66],Not_African_American:[AA:60,AG:1]}                 | 0.48031496 | 0.90275544 | {ARMB:[AA:58],APMB:[AA:68,AG:1]}                 | 1           | 1 |
| chr8:39913834  | {African_American:[CC:60,CT:4],Not_African_American:[CC:61]}                 | 0.11940834 | 0.81817066 | {ARMB:[CC:55,CT:1],APMB:[CC:66,CT:3]}            | 0.627210793 | 1 |
| chr8:60714930  | {African_American:[CC:64],Not_African_American:[CC:56,CT:1]}                 | 0.47107438 | 0.90275544 | {ARMB:[CC:54,CT:1],APMB:[CC:66]}                 | 0.454545455 | 1 |
| chr8:85177144  | {African_American:[CC:66,AG:1],Not_African_American:[CC:61]}                 | 1          | 1          | {ARMB:[CC:59],APMB:[CC:68,AG:1]}                 | 1           | 1 |
| chr8:94719844  | {African_American:[CC:66,GG:1],Not_African_American:[CC:60]}                 | 1          | 1          | {ARMB:[CC:59],APMB:[CC:67,GG:1]}                 | 1           | 1 |
| chr8:94719846  | {African_American:[CC:66,GG:1],Not_African_American:[CC:60]}                 | 1          | 1          | {ARMB:[CC:59],APMB:[CC:67,GG:1]}                 | 1           | 1 |
| chr8:94719877  | {African_American:[CC:67],Not_African_American:[CC:60,GG:1]}                 | 0.4765625  | 0.90275544 | {ARMB:[CC:58,GG:1],APMB:[CC:69]}                 | 0.4609375   | 1 |
| chr8:133461935 | {African_American:[GG:64,AG:2],Not_African_American:[GG:61]}                 | 0.4968129  | 0.90275544 | {ARMB:[GG:58],APMB:[GG:67,AG:2]}                 | 0.499812523 | 1 |
| chr8:133461984 | {African_American:[TT:64],Not_African_American:[TT:58,CT:1]}                 | 0.4796748  | 0.90275544 | {ARMB:[TT:57],APMB:[TT:65,CT:1]}                 | 1           | 1 |
| chr8:140350873 | {African_American:[CC:65,CT:1],Not_African_American:[CC:58]}                 | 1          | 1          | {ARMB:[CC:56],APMB:[CC:67,CT:1]}                 | 1           | 1 |
| chr8:140350901 | {African_American:[AA:66],Not_African_American:[AA:58,TT:2]}                 | 0.2247619  | 0.90275544 | {ARMB:[AA:57,TT:1],APMB:[AA:67,TT:1]}            | 1           | 1 |
| chr8:140350968 | {African_American:[GG:66,AG:1],Not_African_American:[GG:61]}                 | 1          | 1          | {ARMB:[GG:59],APMB:[GG:68,AG:1]}                 | 1           | 1 |
| chr8:140351024 | {African_American:[CC:62,CT:2],Not_African_American:[CC:59,CT:2]}            | 1          | 1          | {ARMB:[CC:56,CT:2],APMB:[CC:65,CT:2]}            | 1           | 1 |
| chr8:142016979 | {African_American:[CC:63,TT:1],Not_African_American:[CC:60]}                 | 1          | 1          | {ARMB:[CC:55,TT:1],APMB:[CC:68]}                 | 0.451612903 | 1 |
| chr8:142017040 | {African_American:[GG:55,AG:7],Not_African_American:[GG:53,AG:4,AA:1]}       | 0.44094599 | 0.90275544 | {ARMB:[GG:52,AG:4],APMB:[GG:56,AG:7,AA:1]}       | 0.637810736 | 1 |
| chr8:142017153 | {African_American:[GG:66,AG:1],Not_African_American:[GG:61]}                 | 1          | 1          | {ARMB:[GG:59],APMB:[GG:68,AG:1]}                 | 1           | 1 |
| chr8:142670253 | {African_American:[TT:62,CT:1],Not_African_American:[TT:60]}                 | 1          | 1          | {ARMB:[TT:56,CT:1],APMB:[TT:66]}                 | 0.463414634 | 1 |
| chr9:34400530  | {African_American:[TT:65],Not_African_American:[TT:59,CT:1]}                 | 0.48       | 0.90275544 | {ARMB:[TT:58],APMB:[TT:66,CT:1]}                 | 1           | 1 |
| chr9:34400627  | {African_American:[GG:65,AG:1],Not_African_American:[GG:57]}                 | 1          | 1          | {ARMB:[GG:55],APMB:[GG:67,AG:1]}                 | 1           | 1 |
| chr9:34400638  | {African_American:[CC:67],Not_African_American:[CC:60,GG:1]}                 | 0.4765625  | 0.90275544 | {ARMB:[CC:59],APMB:[CC:68,GG:1]}                 | 1           | 1 |
| chr9:34400645  | {African_American:[GG:66],Not_African_American:[GG:57,AG:1]}                 | 0.46774194 | 0.90275544 | {ARMB:[GG:58],APMB:[GG:65,AG:1]}                 | 1           | 1 |
| chr9:34400648  | {African_American:[GG:64,AG:1],Not_African_American:[GG:58]}                 | 1          | 1          | {ARMB:[GG:56,AG:1],APMB:[GG:66]}                 | 0.463414634 | 1 |
| chr9:34400670  | {African_American:[GG:63,AG:1],Not_African_American:[GG:54]}                 | 1          | 1          | {ARMB:[GG:53],APMB:[GG:64,AG:1]}                 | 1           | 1 |
| chr9:35651010  | {African_American:[GG:66],Not_African_American:[GG:59,AG:1]}                 | 0.47619048 | 0.90275544 | {ARMB:[GG:57],APMB:[GG:68,AG:1]}                 | 1           | 1 |
| chr9:87551727  | {African_American:[CC:64],Not_African_American:[CC:54,CT:1]}                 | 0.46218487 | 0.90275544 | {ARMB:[CC:55],APMB:[CC:63,CT:1]}                 | 1           | 1 |
| chr9:87551803  | {African_American:[GG:58,AG:4],Not_African_American:[GG:61]}                 | 0.11892764 | 0.81817066 | {ARMB:[GG:55,AG:2],APMB:[GG:64,AG:2]}            | 1           | 1 |
| chr9:89656065  | {African_American:[TT:63],Not_African_American:[TT:57,CT:1]}                 | 0.47933884 | 0.90275544 | {ARMB:[TT:55],APMB:[TT:65,CT:1]}                 | 1           | 1 |
| chr9:89656101  | {African_American:[CC:60,CT:2],Not_African_American:[CC:61]}                 | 0.49593496 | 0.90275544 | {ARMB:[CC:56],APMB:[CC:65,CT:2]}                 | 0.49993336  | 1 |
| chr9:89656113  | {African_American:[CC:67],Not_African_American:[CC:60,CT:1]}                 | 0.4765625  | 0.90275544 | {ARMB:[CC:58,CT:1],APMB:[CC:69]}                 | 0.4609375   | 1 |
| chr9:89656157  | {African_American:[CC:64,CT:1],Not_African_American:[CC:61]}                 | 1          | 1          | {ARMB:[CC:57],APMB:[CC:68,CT:1]}                 | 1           | 1 |
| chr9:108615987 | {African_American:[CC:65,CT:1],Not_African_American:[CC:61]}                 | 1          | 1          | {ARMB:[CC:58,CT:1],APMB:[CC:68]}                 | 0.464566929 | 1 |
| chr9:108616208 | {African_American:[AA:65,AG:1],Not_African_American:[AA:60]}                 | 1          | 1          | {ARMB:[AA:57,AG:1],APMB:[AA:68]}                 | 0.46031746  | 1 |
| chr9:111687606 | {African_American:[AA:63,AG:2],Not_African_American:[AA:61]}                 | 0.49650794 | 0.90275544 | {ARMB:[AA:58],APMB:[AA:66,AG:2]}                 | 0.499174603 | 1 |
| chr9:111687611 | {African_American:[TT:67],Not_African_American:[TT:60,CT:1]}                 | 0.4765625  | 0.90275544 | {ARMB:[TT:58,CT:1],APMB:[TT:69]}                 | 0.4609375   | 1 |
| chr9:111687640 | {African_American:[CC:60,CT:1],Not_African_American:[CC:61]}                 | 1          | 1          | {ARMB:[CC:55],APMB:[CC:66,CT:1]}                 | 1           | 1 |

|                |                                                                                            |            |            |                                                                  |             |   |
|----------------|--------------------------------------------------------------------------------------------|------------|------------|------------------------------------------------------------------|-------------|---|
| chr9:119360941 | {African_American: {TT: 67}, Not_African_American: {TT: 60, CT: 1}}                        | 0.4765625  | 0.90275544 | {ARMB: {TT: 59}, APMB: {TT: 68, CT: 1}}                          | 1           | 1 |
| chr9:119361087 | {African_American: {GG: 57, AG: 1}, Not_African_American: {GG: 59}}                        | 0.4957265  | 0.90275544 | {ARMB: {GG: 57, AG: 1}, APMB: {GG: 59}}                          | 0.495726496 | 1 |
| chr9:124096328 | {African_American: {CC: 63, CT: 1}, Not_African_American: {CC: 54}}                        | 1          | 1          | {ARMB: {CC: 54, CT: 1}, APMB: {CC: 63}}                          | 0.466101695 | 1 |
| chr9:124096336 | {African_American: {TT: 64}, Not_African_American: {TT: 58, CT: 1}}                        | 0.4796748  | 0.90275544 | {ARMB: {TT: 56, CT: 1}, APMB: {TT: 66}}                          | 0.463414634 | 1 |
| chr9:124096491 | {African_American: {AA: 67}, Not_African_American: {AA: 58, AG: 1}}                        | 0.46825397 | 0.90275544 | {ARMB: {AA: 57, AG: 1}, APMB: {AA: 68}}                          | 0.46031746  | 1 |
| chr9:124369596 | {African_American: {CC: 65, CT: 1}, Not_African_American: {CC: 61}}                        | 1          | 1          | {ARMB: {CC: 57, CT: 1}, APMB: {CC: 69}}                          | 0.456692913 | 1 |
| chr9:126420886 | {African_American: {TT: 67}, Not_African_American: {TT: 58, CC: 1}}                        | 0.46825397 | 0.90275544 | {ARMB: {TT: 57, CC: 1}, APMB: {TT: 68}}                          | 0.46031746  | 1 |
| chr9:126421062 | {African_American: {AA: 61, AG: 1}, Not_African_American: {AA: 57}}                        | 1          | 1          | {ARMB: {AA: 55, AG: 1}, APMB: {AA: 63}}                          | 0.470588235 | 1 |
| chr9:132197966 | {African_American: {GG: 65, AG: 1}, Not_African_American: {GG: 61}}                        | 1          | 1          | {ARMB: {GG: 58, AG: 1}, APMB: {GG: 68}}                          | 0.464566929 | 1 |
| chr9:132197982 | {African_American: {GG: 65}, Not_African_American: {GG: 55, AG: 1}}                        | 0.46280992 | 0.90275544 | {ARMB: {GG: 55, AG: 1}, APMB: {GG: 65}}                          | 0.462809917 | 1 |
| chr9:132197985 | {African_American: {GG: 65, AG: 1}, Not_African_American: {GG: 56}}                        | 1          | 1          | {ARMB: {GG: 56, AG: 1}, APMB: {GG: 65}}                          | 0.467213115 | 1 |
| chr9:132197990 | {African_American: {GG: 65}, Not_African_American: {GG: 55, AA: 1}}                        | 0.46280992 | 0.90275544 | {ARMB: {GG: 54, AA: 1}, APMB: {GG: 66}}                          | 0.454545455 | 1 |
| chr9:132197992 | {African_American: {GG: 64}, Not_African_American: {GG: 57, AA: 1}}                        | 0.47540984 | 0.90275544 | {ARMB: {GG: 55, AA: 1}, APMB: {GG: 66}}                          | 0.459016393 | 1 |
| chr9:132197994 | {African_American: {GG: 66}, Not_African_American: {GG: 54, AA: 1}}                        | 0.45454545 | 0.90275544 | {ARMB: {GG: 55, AA: 1}, APMB: {GG: 65}}                          | 0.462809917 | 1 |
| chr9:132197996 | {African_American: {GG: 64}, Not_African_American: {GG: 55, AG: 1}}                        | 0.46666667 | 0.90275544 | {ARMB: {GG: 53}, APMB: {GG: 66, AG: 1}}                          | 1           | 1 |
| chr9:132197999 | {African_American: {GG: 63, AG: 1}, Not_African_American: {GG: 57}}                        | 1          | 1          | {ARMB: {GG: 55}, APMB: {GG: 65, AG: 1}}                          | 1           | 1 |
| chr9:132198004 | {African_American: {CC: 66, AA: 1}, Not_African_American: {CC: 61}}                        | 1          | 1          | {ARMB: {CC: 59}, APMB: {CC: 68, AA: 1}}                          | 1           | 1 |
| chr9:133574964 | {African_American: {CC: 66, CT: 1}, Not_African_American: {CC: 61}}                        | 1          | 1          | {ARMB: {CC: 58, CT: 1}, APMB: {CC: 69}}                          | 0.4609375   | 1 |
| chr9:133575023 | {African_American: {TT: 67}, Not_African_American: {TT: 60, AA: 1}}                        | 0.4765625  | 0.90275544 | {ARMB: {TT: 58, AA: 1}, APMB: {TT: 69}}                          | 0.4609375   | 1 |
| chr9:133575024 | {African_American: {GG: 63}, Not_African_American: {GG: 57, AG: 1}}                        | 0.47933884 | 0.90275544 | {ARMB: {GG: 55}, APMB: {GG: 65, AG: 1}}                          | 1           | 1 |
| chr9:133708206 | {African_American: {TT: 63}, Not_African_American: {TT: 59, CT: 1}}                        | 0.48780488 | 0.90275544 | {ARMB: {TT: 56}, APMB: {TT: 66, CT: 1}}                          | 1           | 1 |
| chr9:133708218 | {African_American: {CC: 66, CT: 1}, Not_African_American: {CC: 60}}                        | 1          | 1          | {ARMB: {CC: 58, CT: 1}, APMB: {CC: 68}}                          | 0.464566929 | 1 |
| chr9:133708220 | {African_American: {CC: 65}, Not_African_American: {CC: 59, CT: 1}}                        | 0.48       | 0.90275544 | {ARMB: {CC: 58}, APMB: {CC: 66, CT: 1}}                          | 1           | 1 |
| chr9:133708261 | {African_American: {CC: 65, CT: 1}, Not_African_American: {CC: 59}}                        | 1          | 1          | {ARMB: {CC: 57}, APMB: {CC: 67, CT: 1}}                          | 1           | 1 |
| chr9:133708299 | {African_American: {GG: 65, AG: 1}, Not_African_American: {GG: 61}}                        | 1          | 1          | {ARMB: {GG: 58}, APMB: {GG: 68, AG: 1}}                          | 1           | 1 |
| chr9:133708380 | {African_American: {TT: 66, GG: 1}, Not_African_American: {TT: 61}}                        | 1          | 1          | {ARMB: {TT: 58, GG: 1}, APMB: {TT: 69}}                          | 0.4609375   | 1 |
| chr9:133960123 | {African_American: {CC: 62}, Not_African_American: {CC: 55, CT: 1}}                        | 0.47457627 | 0.90275544 | {ARMB: {CC: 54}, APMB: {CC: 63, CT: 1}}                          | 1           | 1 |
| chr9:133960128 | {African_American: {TT: 64}, Not_African_American: {TT: 56, CT: 1}}                        | 0.47107438 | 0.90275544 | {ARMB: {TT: 55}, APMB: {TT: 65, CT: 1}}                          | 1           | 1 |
| chr9:133960129 | {African_American: {CC: 63}, Not_African_American: {CC: 55, CT: 1}}                        | 0.47058824 | 0.90275544 | {ARMB: {CC: 55}, APMB: {CC: 63, CT: 1}}                          | 1           | 1 |
| chr9:133960273 | {African_American: {GG: 66, AG: 1}, Not_African_American: {GG: 60}}                        | 1          | 1          | {ARMB: {GG: 58, AG: 1}, APMB: {GG: 68}}                          | 0.464566929 | 1 |
| chr9:134282248 | {African_American: {TT: 60, CT: 1}, Not_African_American: {TT: 59}}                        | 1          | 1          | {ARMB: {TT: 53, CT: 1}, APMB: {TT: 66}}                          | 0.45        | 1 |
| chr9:134282254 | {African_American: {CC: 62}, Not_African_American: {CC: 59, TT: 1}}                        | 0.49180328 | 0.90275544 | {ARMB: {CC: 56}, APMB: {CC: 65, TT: 1}}                          | 1           | 1 |
| chr9:134282261 | {African_American: {TT: 65}, Not_African_American: {TT: 59, CT: 1}}                        | 0.48       | 0.90275544 | {ARMB: {TT: 56}, APMB: {TT: 68, CT: 1}}                          | 1           | 1 |
| chr9:134282376 | {African_American: {GG: 65, AG: 1}, Not_African_American: {GG: 60}}                        | 1          | 1          | {ARMB: {GG: 57}, APMB: {GG: 68, AG: 1}}                          | 1           | 1 |
| chr9:134282383 | {African_American: {GG: 65, AG: 1}, Not_African_American: {GG: 59}}                        | 1          | 1          | {ARMB: {GG: 56, AG: 1}, APMB: {GG: 68}}                          | 0.456       | 1 |
| chr9:134282387 | {African_American: {GG: 60, AG: 1}, Not_African_American: {GG: 61}}                        | 1          | 1          | {ARMB: {GG: 56, AG: 1}, APMB: {GG: 65}}                          | 0.467213115 | 1 |
| chr9:134282388 | {African_American: {GG: 64, AG: 1}, Not_African_American: {GG: 61}}                        | 1          | 1          | {ARMB: {GG: 57}, APMB: {GG: 68, AG: 1}}                          | 1           | 1 |
| chr9:134282395 | {African_American: {GG: 63, AG: 2}, Not_African_American: {GG: 61}}                        | 0.49650794 | 0.90275544 | {ARMB: {GG: 57, AG: 1}, APMB: {GG: 67, AG: 1}}                   | 1           | 1 |
| chr9:134282407 | {African_American: {GG: 64}, Not_African_American: {GG: 60}}                               | 1          | 1          | {ARMB: {GG: 58}, APMB: {GG: 66, AG: 1}}                          | 1           | 1 |
| chr9:134282408 | {African_American: {AA: 64}, Not_African_American: {AA: 58, AG: 1}}                        | 0.4796748  | 0.90275544 | {ARMB: {AA: 54, AG: 1}, APMB: {AA: 68}}                          | 0.447154472 | 1 |
| chr9:134282409 | {African_American: {GG: 65}, Not_African_American: {GG: 52, AG: 1}}                        | 0.44915254 | 0.90275544 | {ARMB: {GG: 54}, APMB: {GG: 63, AG: 1}}                          | 1           | 1 |
| chr9:134333397 | {African_American: {TT: 59, CC: 1}, Not_African_American: {TT: 57}}                        | 1          | 1          | {ARMB: {TT: 56}, APMB: {TT: 60, CC: 1}}                          | 1           | 1 |
| chr9:134333407 | {African_American: {CC: 63, TT: 1}, Not_African_American: {CC: 59}}                        | 1          | 1          | {ARMB: {CC: 58, TT: 1}, APMB: {CC: 64}}                          | 0.479674797 | 1 |
| chr9:134333410 | {African_American: {CC: 62, CT: 1}, Not_African_American: {CC: 59}}                        | 1          | 1          | {ARMB: {CC: 55, CT: 1}, APMB: {CC: 66}}                          | 0.459016393 | 1 |
| chr9:134333424 | {African_American: {CC: 65}, Not_African_American: {CC: 58, CT: 1}}                        | 0.47580645 | 0.90275544 | {ARMB: {CC: 56, CT: 1}, APMB: {CC: 67}}                          | 0.459677419 | 1 |
| chr9:134333430 | {African_American: {CC: 64, CT: 1}, Not_African_American: {CC: 59}}                        | 1          | 1          | {ARMB: {CC: 57}, APMB: {CC: 66, CT: 1}}                          | 1           | 1 |
| chr9:134333442 | {African_American: {CC: 62, CT: 2}, Not_African_American: {CC: 61}}                        | 0.49625806 | 0.90275544 | {ARMB: {CC: 58}, APMB: {CC: 65, CT: 2}}                          | 0.498580645 | 1 |
| chr9:134333448 | {African_American: {CC: 64, CT: 1}, Not_African_American: {CC: 59, CT: 1}}                 | 1          | 1          | {ARMB: {CC: 56, CT: 2}, APMB: {CC: 67}}                          | 0.213290323 | 1 |
| chr9:134333455 | {African_American: {TT: 65, CT: 1}, Not_African_American: {TT: 59}}                        | 1          | 1          | {ARMB: {TT: 57}, APMB: {TT: 67, CT: 1}}                          | 1           | 1 |
| chr9:134333571 | {African_American: {AA: 61, GG: 1}, Not_African_American: {AA: 60}}                        | 1          | 1          | {ARMB: {AA: 56, GG: 1}, APMB: {AA: 65}}                          | 0.467213115 | 1 |
| chr9:134373222 | {African_American: {CC: 67}, Not_African_American: {CC: 60, CT: 1}}                        | 0.4765625  | 0.90275544 | {ARMB: {CC: 58, CT: 1}, APMB: {CC: 69}}                          | 0.4609375   | 1 |
| chr9:134373223 | {African_American: {GG: 66, AG: 1}, Not_African_American: {GG: 61}}                        | 1          | 1          | {ARMB: {GG: 57, AG: 1}, APMB: {GG: 68}}                          | 0.46031746  | 1 |
| chr9:134373227 | {African_American: {CC: 66, CT: 1}, Not_African_American: {CC: 60}}                        | 1          | 1          | {ARMB: {CC: 58, CT: 1}, APMB: {CC: 68}}                          | 0.464566929 | 1 |
| chr9:134373236 | {African_American: {CC: 66, CT: 1}, Not_African_American: {CC: 61}}                        | 1          | 1          | {ARMB: {CC: 58, CT: 1}, APMB: {CC: 69}}                          | 0.4609375   | 1 |
| chr9:134373293 | {African_American: {CC: 66, CT: 1}, Not_African_American: {CC: 61}}                        | 1          | 1          | {ARMB: {CC: 59}, APMB: {CC: 68, CT: 1}}                          | 1           | 1 |
| chr9:134373321 | {African_American: {CC: 61, CT: 3}, Not_African_American: {CC: 61}}                        | 0.2443871  | 0.90275544 | {ARMB: {CC: 57, CT: 2}, APMB: {CC: 65, CT: 1}}                   | 0.601715185 | 1 |
| chr9:134416325 | {African_American: {CC: 64, CT: 1}, Not_African_American: {CC: 60}}                        | 1          | 1          | {ARMB: {CC: 59}, APMB: {CC: 65, CT: 1}}                          | 1           | 1 |
| chr9:134416483 | {African_American: {AA: 62, AG: 1}, Not_African_American: {AA: 55}}                        | 1          | 1          | {ARMB: {AA: 56}, APMB: {AA: 61, AG: 1}}                          | 1           | 1 |
| chr9:134481969 | {African_American: {GG: 57, AG: 4}, Not_African_American: {GG: 61}}                        | 0.1188277  | 0.81817066 | {ARMB: {GG: 52, AG: 2}, APMB: {GG: 66, AG: 2}}                   | 1           | 1 |
| chr9:134482040 | {African_American: {CC: 67}, Not_African_American: {CC: 60, AA: 1}}                        | 0.4765625  | 0.90275544 | {ARMB: {CC: 59}, APMB: {CC: 68, AA: 1}}                          | 1           | 1 |
| chr9:134690653 | {African_American: {CC: 63}, Not_African_American: {CC: 56, CT: 1}}                        | 0.475      | 0.90275544 | {ARMB: {CC: 55, CT: 1}, APMB: {CC: 64}}                          | 0.466666667 | 1 |
| chr9:134690734 | {African_American: {GG: 34, AG: 19, AA: 8}, Not_African_American: {AA: 31, AG: 18, GG: 6}} | 2.683E-08  | 5.1917E+06 | {ARMB: {AA: 22, AG: 21, GG: 11}, APMB: {GG: 29, AA: 17, AG: 16}} | 0.011616841 | 1 |
| chr9:134690739 | {African_American: {GG: 66, AG: 1}, Not_African_American: {GG: 61}}                        | 1          | 1          | {ARMB: {GG: 58, AG: 1}, APMB: {GG: 69}}                          | 0.4609375   | 1 |
| chr9:134690810 | {African_American: {AA: 65}, Not_African_American: {AA: 58, AG: 1}}                        | 0.47580645 | 0.90275544 | {ARMB: {AA: 56}, APMB: {AA: 67, AG: 1}}                          | 1           | 1 |
| chr9:136522661 | {African_American: {CC: 67}, Not_African_American: {CC: 60, CT: 1}}                        | 0.4765625  | 0.90275544 | {ARMB: {CC: 59}, APMB: {CC: 68, CT: 1}}                          | 1           | 1 |
| chr9:136522665 | {African_American: {GG: 66, AG: 1}, Not_African_American: {GG: 56, AG: 2}}                 | 0.59641857 | 1          | {ARMB: {GG: 55, AG: 2}, APMB: {GG: 67, AG: 1}}                   | 0.591357986 | 1 |
| chr9:136522702 | {African_American: {CC: 66}, Not_African_American: {CC: 59, CT: 2}}                        | 0.22872141 | 0.90275544 | {ARMB: {CC: 58, CT: 1}, APMB: {CC: 67, CT: 1}}                   | 1           | 1 |
| chr9:136522799 | {African_American: {GG: 63, AG: 1}, Not_African_American: {GG: 60}}                        | 1          | 1          | {ARMB: {GG: 55, AG: 1}, APMB: {GG: 68}}                          | 0.451612903 | 1 |
| chr9:136600063 | {African_American: {CC: 65, TT: 1}, Not_African_American: {CC: 61}}                        | 1          | 1          | {ARMB: {CC: 58, TT: 1}, APMB: {CC: 68}}                          | 0.464566929 | 1 |
| chr9:136600201 | {African_American: {TT: 50, CT: 10}, Not_African_American: {TT: 61}}                       | 0.00059588 | 0.02005278 | {ARMB: {TT: 52, CT: 7}, APMB: {TT: 59, CT: 3}}                   | 0.197802356 | 1 |
| chr9:137041311 | {African_American: {TT: 65}, Not_African_American: {TT: 58, CT: 1}}                        | 0.47580645 | 0.90275544 | {ARMB: {TT: 55}, APMB: {TT: 68, CT: 1}}                          | 1           | 1 |
| chr9:137041426 | {African_American: {GG: 64, AG: 1}, Not_African_American: {GG: 59}}                        | 1          | 1          | {ARMB: {GG: 57, AG: 1}, APMB: {GG: 66}}                          | 0.467741935 | 1 |
| chr9:137459331 | {African_American: {GG: 66}, Not_African_American: {GG: 56, AG: 2}}                        | 0.21675846 | 0.90275544 | {ARMB: {GG: 58, AG: 1}, APMB: {GG: 64, AG: 1}}                   | 1           | 1 |
| chrX:79367344  | {African_American: {GG: 64, AA: 1, AG: 1}, Not_African_American: {GG: 61}}                 | 1          | 1          | {ARMB: {GG: 56, AA: 1, AG: 1}, APMB: {GG: 69}}                   | 0.206599175 | 1 |
| chrX:103376547 | {African_American: {TT: 67}, Not_African_American: {TT: 60, AA: 1}}                        | 0.4765625  | 0.90275544 | {ARMB: {TT: 59}, APMB: {TT: 68, AA: 1}}                          | 1           | 1 |
| chrX:118727561 | {African_American: {CC: 67}, Not_African_American: {CC: 58, TT: 1}}                        | 0.46825397 | 0.90275544 | {ARMB: {CC: 57, TT: 1}, APMB: {CC: 68}}                          | 0.46031746  | 1 |



## Reference

1. K. Fu *et al.*, A temporal transcriptome and methylome in human embryonic stem cell-derived cardiomyocytes identifies novel regulators of early cardiac development. *Epigenetics* 10.1080/15592294.2018.1526029 (2018).
2. R. M. Leggett, R. H. Ramirez-Gonzalez, B. J. Clavijo, D. Waite, R. P. Davey, Sequencing quality assessment tools to enable data-driven informatics for high throughput genomics. *Front Genet* **4**, 288 (2013).
3. A. M. Bolger, M. Lohse, B. Usadel, Trimmomatic: a flexible trimmer for Illumina sequence data. *Bioinformatics* **30**, 2114-2120 (2014).
4. W. Guo *et al.*, BS-Seeker2: a versatile aligning pipeline for bisulfite sequencing data. *BMC Genomics* **14**, 774 (2013).
5. C. Farrell, M. Thompson, A. Tosevska, A. Oyetunde, M. Pellegrini, BiSulfite Bolt: A BiSulfite Sequencing Analysis Platform. *bioRxiv* 10.1101/2020.10.06.328559, 2020.2010.2006.328559 (2020).
6. M. Morselli *et al.*, Targeted bisulfite sequencing for biomarker discovery. *Methods* 10.1016/j.ymeth.2020.07.006 (2020).
7. H. Zou, T. Hastie, Regularization and variable selection via the elastic net (vol B 67, pg 301, 2005). *J R Stat Soc B* **67**, 768-768 (2005).
8. I. Guyon, J. Weston, S. Barnhill, V. Vapnik, Gene Selection for Cancer Classification using Support Vector Machines. *Machine Learning* **46**, 389-422 (2002).
9. N. C. Sheffield, C. Bock, LOLA: enrichment analysis for genomic region sets and regulatory elements in R and Bioconductor. *Bioinformatics* **32**, 587-589 (2016).
10. J. Harrow *et al.*, GENCODE: the reference human genome annotation for The ENCODE Project. *Genome Res* **22**, 1760-1774 (2012).
11. M. Sanchez-Castillo *et al.*, CODEX: a next-generation sequencing experiment database for the haematopoietic and embryonic stem cell communities. *Nucleic Acids Res* **43**, D1117-1123 (2015).
12. M. Farlik *et al.*, DNA Methylation Dynamics of Human Hematopoietic Stem Cell Differentiation. *Cell Stem Cell* **19**, 808-822 (2016).
13. L. D. Orozco *et al.*, Epigenome-wide association in adipose tissue from the METSIM cohort. *Hum Mol Genet* **27**, 2586 (2018).
14. P. Y. Chen *et al.*, Prenatal Growth Patterns and Birthweight Are Associated With Differential DNA Methylation and Gene Expression of Cardiometabolic Risk Genes in Human Placentas: A Discovery-Based Approach. *Reprod Sci* **25**, 523-539 (2018).
15. L. Lam *et al.*, Epigenetic changes in T-cell and monocyte signatures and production of neurotoxic cytokines in ALS patients. *FASEB J* **30**, 3461-3473 (2016).
16. J. H. Martens, H. G. Stunnenberg, BLUEPRINT: mapping human blood cell epigenomes. *Haematologica* **98**, 1487-1489 (2013).

***MRSA Systems Immunobiology Group Author List:*** Richard Ahn, Arnold S. Bayer, Liana C. Chan, Yu-Ling Chang, Scott G. Filler, Vance G. Fowler, Jr., David Gjertson, Alexander Hoffmann, Felix Mba Medie, Tsuyoshi Mikkaichi, Simon Mitchell, Yan Qin, Elaine F. Reed, Maura Rossetti, Felicia Ruffin, Batu K. Sharma-Kuinkel, Katherine Sheu, Joshua Thaden, Alan J. Waring, Yan Q. Xiong, Ying Zheng, Michael R. Yeaman
